# Supplementary material for: Triple coding in human SRD5A1 mRNA
Source: Research Square preprint supplement (doi:10.21203/rs.3.rs-5390104/v1), 2024-12-19
Supplement: Supplementary file 2 [file 5fc1f14d1c38f5df7584377d.xlsx]

## Sheet: martidata_zscored
study_accession	Run	spots	bases	avgLength	size_MB	Experiment	LibraryName	LibraryStrategy	LibrarySelection	LibrarySource	LibraryLayout	InsertSize	InsertDev	Platform	Model	SRAStudy	BioProject	Study_Pubmed_id	ProjectID	Sample	BioSample	SampleType	TaxID	ScientificName	SampleName	CenterName	Submission	MONTH	YEAR	AUTHOR	sample_source	sample_title	LIBRARYTYPE	REPLICATE	CONDITION	INHIBITOR	BATCH	TIMEPOINT	TISSUE	CELL_LINE	GENE	FRACTION	KEEP	UNIQUE	CHECKED	name	not_unique	ratio	mean_tpm
PRJNA755296	SRR15480790	44115556	1306405839	29	480	SRX11780887		OTHER	other	TRANSCRIPTOMIC	SINGLE	0	0	ILLUMINA	Illumina NovaSeq 6000	SRP332718	PRJNA755296	35869499		SRS9785572	SAMN20810605	simple	9606	Homo sapiens	GSM5520352	GEO	SRA1278709	8	2021	Chen	Control cells	Ribo-seq_C03	RFP	1								auto_2967	TRUE		auto	RFP_NA_1_NA_NA_NA_NA_NA_auto_2967_NA	FALSE	1	0.00561273
PRJNA755296	SRR15480791	37293581	1140947271	30	417	SRX11780888		OTHER	other	TRANSCRIPTOMIC	SINGLE	0	0	ILLUMINA	Illumina NovaSeq 6000	SRP332718	PRJNA755296	35869499		SRS9785573	SAMN20810606	simple	9606	Homo sapiens	GSM5520353	GEO	SRA1278709	8	2021	Chen	Cells exposed to PM2.5	Ribo-seq_P4001	RFP	1								auto_2968	TRUE		auto	RFP_NA_1_NA_NA_NA_NA_NA_auto_2968_NA	FALSE	1	0.0232935
PRJNA756018	SRR15513198	34631016	1216179719	35	500	SRX11811992		RNA-Seq	cDNA	TRANSCRIPTOMIC	SINGLE	0	0	ILLUMINA	NextSeq 500	SRP333128	PRJNA756018	35841888		SRS9826512	SAMN20849892	simple	9606	Homo sapiens	GSM5527723	GEO	SRA1280330	7	2022	Chothani	untreated human aortic endothelial cells	HA_EC_2 (RiboSeq)	RFP	1								auto_3019	TRUE		auto	RFP_NA_1_NA_NA_NA_NA_NA_auto_3019_NA	FALSE	1	0.0108998
PRJNA809587	SRR18113810	34549631	5182444650	150	1847	SRX14264375	GSM5911790	OTHER	other	TRANSCRIPTOMIC	SINGLE	0	0	ILLUMINA	Illumina NovaSeq 6000	SRP361145	PRJNA809587	36074823		SRS12083335	SAMN26199033	simple	9606	Homo sapiens	GSM5911790	Wei Xie, School of Life Sciences, Tsinghua University	SRA1376840	10	2022	Zou	Preimplantation embryo	h_4cell_3PN_20_Ribo_rep2	RFP	2				1h				auto_3326	TRUE		auto	RFP_NA_2_1h_NA_NA_NA_NA_auto_3326_NA	FALSE	1	0.00776512
PRJNA809587	SRR18113789	12683413	1902511950	150	665	SRX14264385	GSM5911800	OTHER	other	TRANSCRIPTOMIC	SINGLE	0	0	ILLUMINA	Illumina NovaSeq 6000	SRP361145	PRJNA809587	36074823		SRS12083345	SAMN26199023	simple	9606	Homo sapiens	GSM5911800	Wei Xie, School of Life Sciences, Tsinghua University	SRA1376840	10	2022	Zou	Oocyte	h_MI_19_Ribo_rep2	RFP	2								auto_3341	TRUE		auto	RFP_NA_2_NA_NA_NA_NA_NA_auto_3341_NA	FALSE	1	0.0103507
PRJNA809587	SRR18113778	13183011	1977451650	150	696	SRX14264390	GSM5911805	OTHER	other	TRANSCRIPTOMIC	SINGLE	0	0	ILLUMINA	Illumina NovaSeq 6000	SRP361145	PRJNA809587	36074823		SRS12083350	SAMN26199018	simple	9606	Homo sapiens	GSM5911805	Wei Xie, School of Life Sciences, Tsinghua University	SRA1376840	10	2022	Zou	Preimplantation embryo	h_zygote_3PN_25_Ribo_rep2	RFP	1								auto_3350	TRUE		auto	RFP_NA_1_NA_NA_NA_NA_NA_auto_3350_NA	FALSE	1	0.00884301
PRJNA385767	SRR5515149	17368471	543794511	31	290	SRX2788528		OTHER	other	TRANSCRIPTOMIC	SINGLE	0	0	ILLUMINA	Illumina HiSeq 2500	SRP106608	PRJNA385767	28920958		SRS2170092	SAMN06909553	simple	9606	Homo sapiens	GSM2602090	GEO	SRA560458	9	2017	Vu	MOLM13 ribosome-depleted RNA	MOLM13 METTL3 shRNA #12 Ribo-seq rep 3	RFP	3								auto_946	TRUE		auto	RFP_NA_3_NA_NA_NA_NA_NA_auto_946_NA	FALSE	1	0.00575368
PRJNA625261	SRR11542156					SRX8112254		OTHER	other		SINGLE			ILLUMINA		SRP256332	PRJNA625261	33296667	625261	SRS6477340	SAMN14596008			Homo sapiens	GSM4475951	GEO	SRA1065150	12	2020	Chen	Malignant Melanoma	375_RocA3uM	RFP	1	3	chx			skin	A375		Rocalgamide	TRUE		PREETI	RFP_NA_1_NA_skin_A375_3_NA_Rocalgamide_chx	FALSE	1	0.00253859
PRJNA523167	SRR8590781					SRX5391050		RNA-Seq	cDNA		SINGLE			ILLUMINA		SRP186252	PRJNA523167	31911279	523167	SRS4378991	SAMN10965465			Homo sapiens	GSM3611937	GEO	SRA850276	12	2019	Vaklavas	Human ER(+) breast cancer	T47D Charcoal Stripped Serum ribosome protected fragments	RFP	2	charcoal	chx			breast	T47D			TRUE		TESHOME	RFP_NA_2_NA_breast_T47D_charcoal_NA_NA_chx	FALSE	1	0.0106404
PRJNA542670	SRR9049058					SRX5825530		OTHER	other		SINGLE			ILLUMINA		SRP198270	PRJNA542670	31284728	542670	SRS4753584	SAMN11635171			Homo sapiens	GSM3763602	GEO	SRA885795	10	2019	Chothani	Left ventricle tissue of end-stage DCM patients	Left ventricle tissue of end-stage DCM patients (20DM01835)	RFP	7		chx			heart	NONE			TRUE		TESHOME	RFP_NA_7_NA_heart_NONE_NA_NA_NA_chx	FALSE	1	0.00412915
PRJNA406823	SRR6026778	388884	10457719	26	3	SRX3177236		RNA-Seq	cDNA	TRANSCRIPTOMIC	SINGLE	0	0	ILLUMINA	NextSeq 500	SRP117282	PRJNA406823	30257221		SRS2506904	SAMN07629902	simple	9606	Homo sapiens	GSM2779674	GEO	SRA607220	1	2018	Woo	HEK293 cells	THAP_Riboseq_rep2	RFP	2					kidney	HEK293			TRUE		auto	RFP_NA_2_NA_kidney_HEK293_NA_NA_NA_NA	FALSE	1	0.00539059
PRJNA415390	SRR6202815					SRX3312737		OTHER	other		SINGLE			ILLUMINA		SRP120964	PRJNA415390	31601799	415390	SRS2618693	SAMN07822288			Homo sapiens	GSM2828167	GEO	SRA622650	8	2019	Kuppers	Ribosome protected RNA library from NTC sgRNA HEL cells	NTCribo_3	RFP	3		chx			blood	HEL		NTC	TRUE		TESHOME	RFP_NA_3_NA_blood_HEL_NA_NA_NTC_chx	FALSE	1	0.0161425
PRJNA515197	SRR8443313					SRX5250481		OTHER	other		SINGLE			ILLUMINA		SRP179458	PRJNA515197	31171704	515197	SRS4252129	SAMN10743991			Homo sapiens	GSM3562587	GEO	SRA834884	6	2019	Kearse	24 h-treated, HeLa cells	24 h-treated, replicate B footprints	RFP	2		chx		24h	ovary	HeLa			TRUE		TESHOME	RFP_NA_2_24h_ovary_HeLa_NA_NA_NA_chx	FALSE	1	0.0116594
PRJNA285961	SRR2052939					SRX1050356		OTHER	other		SINGLE			ILLUMINA		SRP059187	PRJNA285961	29321322	285961	SRS954620	SAMN03763422			Homo sapiens	GSM1704531	GEO	SRA271639	9	2016	Reid	Huh7 cells	24 h infection cytosol ribosome profiling (Rep 3)	RFP	3	infected	chx		24hr	liver	Huh7		cyto	TRUE		KORNEL	RFP_NA_3_24hr_liver_Huh7_infected_NA_cyto_chx	FALSE	1	0.00330623
PRJNA285961	SRR2052911					SRX1050328		OTHER	other		SINGLE			ILLUMINA		SRP059187	PRJNA285961	29321322	285961	SRS954647	SAMN03763400			Homo sapiens	GSM1704503	GEO	SRA271639	9	2016	Reid	Huh7 cells	6 h infection cytosol ribosome profiling (Rep 1)	RFP	1	infected	chx		6hr	liver	Huh7		cyto	TRUE		KORNEL	RFP_NA_1_6hr_liver_Huh7_infected_NA_cyto_chx	FALSE	1	0.00951744
PRJNA285961	SRR2052995					SRX1050412		OTHER	other		SINGLE			ILLUMINA		SRP059187	PRJNA285961	29321322	285961	SRS954569	SAMN03763479			Homo sapiens	GSM1704587	GEO	SRA271639	9	2016	Reid	Huh7 cells	12 h DENV2 infection Total cell lysate ribosome profiling (rep 1)	RFP	1	infected	chx		12hr	liver	Huh7		DENV2	TRUE		KORNEL	RFP_NA_1_12hr_liver_Huh7_infected_NA_DENV2_chx	FALSE	1	0.00593977
PRJNA285961	SRR2052926					SRX1050343		OTHER	other		SINGLE			ILLUMINA		SRP059187	PRJNA285961	29321322	285961	SRS954631	SAMN03763415			Homo sapiens	GSM1704518	GEO	SRA271639	9	2016	Reid	Huh7 cells	12 h infection ER ribosome profiling (Rep 2)	RFP	2	infected	chx		12hr	liver	Huh7		ER	TRUE		KORNEL	RFP_NA_2_12hr_liver_Huh7_infected_NA_ER_chx	FALSE	1	0.00657928
PRJNA940173	SRR23678229	33624423	1168158468	34	422	SRX19541066	GSM7074857	OTHER	other	TRANSCRIPTOMIC	SINGLE	0	0	ILLUMINA	Illumina NovaSeq 6000	SRP425191	PRJNA940173	1		SRS16926837	SAMN33556612	simple	9606	Homo sapiens	GSM7074857	Molecular and Cell Biology, University of California, Berkeley	SRA1597937	3	2023	Makar	K562	K562 CEBPA reporter cell line, nontargeting sgRNA ribo PI, biol rep 3	RFP	3					bone	K562		PI	TRUE		Michal	RFP_NA_3_NA_bone_K562_NA_NA_PI_NA	FALSE	1	0.00789352
PRJNA350543	SRR4450330					SRX2268407		OTHER	other		SINGLE			ILLUMINA		SRP092068	PRJNA350543	29551269	350543	SRS1759613	SAMN05941856			Homo sapiens	GSM2360178	GEO	SRA486943	2	2018	Khajuria	CD34+ hematopoietic cells	CD34_shRPS19_RPF_2	RFP	2	KD	frozen			blood	CD34	RPS19		TRUE		KORNEL	RFP_NA_2_NA_blood_CD34_KD_RPS19_NA_frozen	FALSE	1	0.00659408
PRJNA340948	SRR5099277					SRX2416033		OTHER	other		SINGLE			ILLUMINA		SRP083699	PRJNA340948	28106072	340948	SRS1853616	SAMN06131997			Homo sapiens	GSM2424853	GEO	SRA458091	12	2016	Shi	HeLa	Ribosome profiling-rep1-siYTHDF3-RPF	RFP	1	KD	chx			ovary	HeLa			TRUE		HÃ…KON	RFP_NA_1_NA_ovary_HeLa_KD_NA_NA_chx	FALSE	1	0.00501919
PRJNA551033	SRR9602039					SRX6367326		OTHER	other		SINGLE			ILLUMINA		SRP212089	PRJNA551033	31396629	551033	SRS5028751	SAMN12137828			Homo sapiens	GSM3905623	GEO	SRA914270	8	2019	Gopalakrishna	Human Embryonic Kidney_Flp-Inâ„¢ 293 T-REx	C6orf203 KO cells	RFP	1	KO	chx			kidney	HEK293		mito	TRUE		TESHOME	RFP_NA_1_NA_kidney_HEK293_KO_NA_mito_chx	FALSE	1	0.00659512
PRJNA527204	SRR8732206					SRX5525068		RNA-Seq	cDNA		SINGLE			ILLUMINA		SRP188505	PRJNA527204	31416668	527204	SRS4491749	SAMN11130401			Homo sapiens	GSM3671686	GEO	SRA860677	8	2019	Kwart	PSEN1 mutant iPSC-derived neurons	ribosome profiling PSEN_1	RFP	1	KO	chx			neuron	iPSC		PSEN1	TRUE		TESHOME	RFP_NA_1_NA_neuron_iPSC_KO_NA_PSEN1_chx	FALSE	1	0.103682
PRJNA275386	SRR1803161					SRX876738		OTHER	other		SINGLE			ILLUMINA		SRP055009	PRJNA275386	26297486	275386	SRS845411	SAMN03344033			Homo sapiens	GSM1609392	GEO	SRA241011	2	2015	Cenik	EBV-transformed lymphoblastoid cells	GM18504_Rep2	RFP	2		chx			bone	LCL		GM18504	TRUE		KORNEL	RFP_NA_2_NA_bone_LCL_NA_NA_GM18504_chx	FALSE	1	0.00719036
PRJNA720951	SRR14200575	82191398	3124357917	38	1267	SRX10567365		OTHER	other	TRANSCRIPTOMIC	SINGLE	0	0	ILLUMINA	Illumina HiSeq 4000	SRP314256	PRJNA720951	34166567		SRS8673642	SAMN18687190	simple	9606	Homo sapiens	GSM5234108	GEO	SRA1217043	4	2021	Sofiadis	Normal lung fibroblasts IMR90	Sen_rep2_rpf	RFP	2					lung			auto_3828	TRUE		auto	RFP_NA_2_NA_lung_NA_NA_NA_auto_3828_NA	FALSE	1	0.00838886
PRJNA542601	SRR9047188					SRX5823725		OTHER	other		SINGLE			ILLUMINA		SRP198221	PRJNA542601	32589965	542601	SRS4751826	SAMN11634331			Homo sapiens	GSM3763005	GEO	SRA885670	6	2020	Lin	MCF10-A cell line	Total RPF	RFP	1		chx			breast	MCF10A			TRUE		TESHOME	RFP_NA_1_NA_breast_MCF10A_NA_NA_NA_chx	FALSE	1	0.00738643
PRJNA603339	SRR10970363					SRX7635877	5R	RNA-Seq	PCR		SINGLE			ILLUMINA		SRP245385	PRJNA603339	31664102	603339	SRS6066596	SAMN13928247			Homo sapiens	5R_GGCTAC_c.459G>A	FOOD AND DRUG ADMINISTRATION	SRA1032624	1	2020	Alexaki		c.459G>A RIBO-SEQ 2	RFP	2	mutation	frozen			kidney	HEK293			TRUE		PREETI	RFP_NA_2_NA_kidney_HEK293_mutation_NA_NA_frozen	FALSE	1	0.00178401
PRJNA854905	SRR19918528	13079260	653963000	50	327	SRX15961067	GSM6284787	OTHER	other	TRANSCRIPTOMIC	SINGLE	0	0	ILLUMINA	Illumina HiSeq 2500	SRP384536	PRJNA854905	35891396		SRS13647409	SAMN29472421	simple	9606	Homo sapiens	GSM6284787	Kamini Singh, Molecular Pharmacology, Albert Einstein College of Medicine	SRA1447869	7	2022	Singh	primary hNPC	B2_ribo	RFP	2					throat	NPC		auto_3459	TRUE		auto	RFP_NA_2_NA_throat_NPC_NA_NA_auto_3459_NA	FALSE	1	0.00499202
PRJNA854905	SRR19918554	16318344	815917200	50	410	SRX15961064	GSM6284784	OTHER	other	TRANSCRIPTOMIC	SINGLE	0	0	ILLUMINA	Illumina HiSeq 2500	SRP384536	PRJNA854905	35891396		SRS13647406	SAMN29472424	simple	9606	Homo sapiens	GSM6284784	Kamini Singh, Molecular Pharmacology, Albert Einstein College of Medicine	SRA1447869	7	2022	Singh	primary hNPC	A1_ribo	RFP	2					throat	NPC			TRUE		auto	RFP_NA_2_NA_throat_NPC_NA_NA_NA_NA	FALSE	1	0.00363705
PRJNA285961	SRR2052932					SRX1050349		OTHER	other		SINGLE			ILLUMINA		SRP059187	PRJNA285961	29321322	285961	SRS954626	SAMN03763423			Homo sapiens	GSM1704524	GEO	SRA271639	9	2016	Reid	Huh7 cells	Interferon treatment ER ribosome profiling (Rep 2)	RFP	2	treated	chx			liver	Huh7		ER	TRUE		KORNEL	RFP_NA_2_NA_liver_Huh7_treated_NA_ER_chx	FALSE	1	0.00512584
PRJNA385767	SRR5515141	12628723	393555916	31	210	SRX2788521		OTHER	other	TRANSCRIPTOMIC	SINGLE	0	0	ILLUMINA	Illumina HiSeq 2500	SRP106608	PRJNA385767	28920958		SRS2170085	SAMN06909560	simple	9606	Homo sapiens	GSM2602082	GEO	SRA560458	9	2017	Vu	MOLM13 ribosome-depleted RNA	MOLM13 Control shRNA Ribo-seq rep 1	RFP	1	WT								TRUE		auto	RFP_NA_1_NA_NA_NA_WT_NA_NA_NA	FALSE	1	0.00466793
PRJNA656190	SRR12415945	8762690	657201750	75	196	SRX8912036		OTHER	other	TRANSCRIPTOMIC	SINGLE	0	0	ILLUMINA	Illumina HiSeq 2000	SRP276951	PRJNA656190	1		SRS7168899	SAMN15767708	simple	9606	Homo sapiens	GSM4715688	GEO	SRA1110388	12	2021	Makar	CAG WT	WT: Wildtype of human multiple myeloma cells for Ribo-seq	RFP	1	WT								TRUE		auto	RFP_NA_1_NA_NA_NA_WT_NA_NA_NA	FALSE	1	0.0044925
PRJNA551033	SRR9602037					SRX6367325		OTHER	other		SINGLE			ILLUMINA		SRP212089	PRJNA551033	31396629	551033	SRS5028750	SAMN12137829			Homo sapiens	GSM3905622	GEO	SRA914270	8	2019	Gopalakrishna	Human Embryonic Kidney_Flp-Inâ„¢ 293 T-REx	C6orf203 wild-type cells	RFP	3	WT	chx			kidney	HEK293		mito	TRUE		TESHOME	RFP_NA_3_NA_kidney_HEK293_WT_NA_mito_chx	FALSE	1	0.00398357
PRJNA359690	SRR5137683					SRX2457068		OTHER	other		SINGLE			ILLUMINA		SRP095901	PRJNA359690	28329689	359690	SRS1890308	SAMN06196956			Homo sapiens	GSM2443021	GEO	SRA517490	1	2020	Benhalevy	HEK293 cells	Wildtype_CHX 3	RFP	3	WT	chx			kidney	HEK293			TRUE		KORNEL	RFP_NA_3_NA_kidney_HEK293_WT_NA_NA_chx	FALSE	1	0.00437485
PRJNA359690	SRR5137684					SRX2457069		OTHER	other		SINGLE			ILLUMINA		SRP095901	PRJNA359690	28329689	359690	SRS1890309	SAMN06196954			Homo sapiens	GSM2443022	GEO	SRA517490	1	2020	Benhalevy	HEK293 cells	Wildtype_CHX 4	RFP	4	WT	chx			kidney	HEK293			TRUE		KORNEL	RFP_NA_4_NA_kidney_HEK293_WT_NA_NA_chx	FALSE	1	0.0031769
PRJNA340948	SRR5099275					SRX2416031		OTHER	other		SINGLE			ILLUMINA		SRP083699	PRJNA340948	28106072	340948	SRS1853614	SAMN06131999			Homo sapiens	GSM2424851	GEO	SRA458091	12	2016	Shi	HeLa	Ribosome profiling-siControl-RPF	RFP		WT	chx			ovary	HeLa			TRUE		HÃ…KON	RFP_NA_NA_NA_ovary_HeLa_WT_NA_NA_chx	FALSE	1	0.0129984
PRJNA527204	SRR8732202					SRX5525064		RNA-Seq	cDNA		SINGLE			ILLUMINA		SRP188505	PRJNA527204	31416668	527204	SRS4491745	SAMN11130405			Homo sapiens	GSM3671682	GEO	SRA860677	8	2019	Kwart	wiltype iPSC-derived neurons	ribosome profiling wt_3	RFP	3	WT	chx			neuron	iPSC			TRUE		TESHOME	RFP_NA_3_NA_neuron_iPSC_WT_NA_NA_chx	FALSE	1	0.0212552
PRJNA937159	SRR23563666	128247336	6412366800	50	3091	SRX19450595	GSM7054177	OTHER	other	TRANSCRIPTOMIC	SINGLE	0	0	ILLUMINA	Illumina HiSeq 2000	SRP423678	PRJNA937159	1		SRS16843369	SAMN33391483	simple	9606	Homo sapiens	GSM7054177	Kamini Singh, Molecular Pharmacology, Albert Einstein College of Medicine	SRA1593440	2	2023	Makar	PANC-1	PANC1 CT-2 RF	RFP	2	WT				pancreas	PANC1			TRUE		Michal	RFP_NA_2_NA_pancreas_PANC1_WT_NA_NA_NA	FALSE	1	0.0105316
PRJNA655417	SRR12391503					SRX8889938		OTHER	other		SINGLE			ILLUMINA		SRP276055	PRJNA655417	32992958	655417	SRS7149417	SAMN15734830			Homo sapiens	GSM4711286	GEO	SRA1108561	9	2020	Kiltschewskij	SH-SY5Y cell line	resting 1 [r1.ribo]	RFP	1	WT	chx			brain	SHSY5Y			TRUE		PREETI	RFP_NA_1_NA_brain_SHSY5Y_WT_NA_NA_chx	FALSE	1	0.00561354
PRJNA527204	SRR8732209					SRX5525071		RNA-Seq	cDNA		SINGLE			ILLUMINA		SRP188505	PRJNA527204	31416668	527204	SRS4491752	SAMN11130426			Homo sapiens	GSM3671689	GEO	SRA860677	8	2019	Kwart	APP/PSEN1 double mutant iPSC-derived neurons	ribosome profiling APP/PSEN1_1	RFP	1	DKO	chx			neuron	iPSC			TRUE		TESHOME	RFP_NA_1_NA_neuron_iPSC_DKO_NA_NA_chx	FALSE	0.944899	0.0746979
PRJNA527204	SRR8732203					SRX5525065		RNA-Seq	cDNA		SINGLE			ILLUMINA		SRP188505	PRJNA527204	31416668	527204	SRS4491746	SAMN11130404			Homo sapiens	GSM3671683	GEO	SRA860677	8	2019	Kwart	APP mutant iPSC-derived neurons	ribosome profiling APP_1	RFP	1	KO	chx			neuron	iPSC		APP	TRUE		TESHOME	RFP_NA_1_NA_neuron_iPSC_KO_NA_APP_chx	FALSE	0.9245	0.0983785
PRJNA285961	SRR2052915					SRX1050332		OTHER	other		SINGLE			ILLUMINA		SRP059187	PRJNA285961	29321322	285961	SRS954644	SAMN03763404			Homo sapiens	GSM1704507	GEO	SRA271639	9	2016	Reid	Huh7 cells	24 h infection cytosol ribosome profiling (Rep 1)	RFP	1	infected	chx		24hr	liver	Huh7		cyto	TRUE		KORNEL	RFP_NA_1_24hr_liver_Huh7_infected_NA_cyto_chx	FALSE	0.907856	0.0386794
PRJNA527204	SRR8732210					SRX5525072		RNA-Seq	cDNA		SINGLE			ILLUMINA		SRP188505	PRJNA527204	31416668	527204	SRS4491753	SAMN11130425			Homo sapiens	GSM3671690	GEO	SRA860677	8	2019	Kwart	APP/PSEN1 double mutant iPSC-derived neurons	ribosome profiling APP/PSEN1_2	RFP	2	DKO	chx			neuron	iPSC			TRUE		TESHOME	RFP_NA_2_NA_neuron_iPSC_DKO_NA_NA_chx	FALSE	0.90001	0.0419586
PRJNA527204	SRR8732207					SRX5525069		RNA-Seq	cDNA		SINGLE			ILLUMINA		SRP188505	PRJNA527204	31416668	527204	SRS4491750	SAMN11130400			Homo sapiens	GSM3671687	GEO	SRA860677	8	2019	Kwart	PSEN1 mutant iPSC-derived neurons	ribosome profiling PSEN_2	RFP	2	KO	chx			neuron	iPSC		PSEN1	TRUE		TESHOME	RFP_NA_2_NA_neuron_iPSC_KO_NA_PSEN1_chx	FALSE	0.860553	0.0902908
PRJNA527204	SRR8732211					SRX5525073		RNA-Seq	cDNA		SINGLE			ILLUMINA		SRP188505	PRJNA527204	31416668	527204	SRS4491754	SAMN11130424			Homo sapiens	GSM3671691	GEO	SRA860677	8	2019	Kwart	APP/PSEN1 double mutant iPSC-derived neurons	ribosome profiling APP/PSEN1_3	RFP	3	DKO	chx			neuron	iPSC			TRUE		TESHOME	RFP_NA_3_NA_neuron_iPSC_DKO_NA_NA_chx	FALSE	0.86048	0.0816559
PRJNA612239	SRR11294610	65451634	2175289986	33	791	SRX7900107		OTHER	other	TRANSCRIPTOMIC	SINGLE	0	0	ILLUMINA	HiSeq X Ten	SRP252557	PRJNA612239	32402251		SRS6308146	SAMN14365306	simple	9606	Homo sapiens	GSM4407816	GEO	SRA1054267	5	2020	Wang	THP-1	THP-1 control ribo rep1	RFP	1	WT				blood	THP1			TRUE		auto	RFP_NA_1_NA_blood_THP1_WT_NA_NA_NA	FALSE	0.842209	0.0226252
PRJNA729461	SRR14510089	16268210	414328493	25	180	SRX10855902		OTHER	other	TRANSCRIPTOMIC	SINGLE	0	0	ILLUMINA	Illumina NovaSeq 6000	SRP319472	PRJNA729461	34226921		SRS8951533	SAMN19116428	simple	9606	Homo sapiens	GSM5291933	GEO	SRA1231346	7	2021	Ichihara	HEK293T cells	si eIF2alpha #2 HEK293T Ribo-seq replicate 2	RFP	2					kidney	HEK293		auto_2791	TRUE		auto	RFP_NA_2_NA_kidney_HEK293_NA_NA_auto_2791_NA	FALSE	0.831447	0.0226108
PRJNA275386	SRR1803170					SRX876747		OTHER	other		SINGLE			ILLUMINA		SRP055009	PRJNA275386	26297486	275386	SRS845401	SAMN03344048			Homo sapiens	GSM1609401	GEO	SRA241011	2	2015	Cenik	EBV-transformed lymphoblastoid cells	GM18526_Rep1	RFP	1		chx			bone	LCL		GM18526	TRUE		KORNEL	RFP_NA_1_NA_bone_LCL_NA_NA_GM18526_chx	FALSE	0.8311	0.0423741
PRJNA448763	SRR6939963					SRX3884314		OTHER	other		SINGLE			ILLUMINA		SRP137150	PRJNA448763	31281537	448763	SRS3123586	SAMN08864550			Homo sapiens	GSM3081774	GEO	SRA681490	6	2019	Zou	tumor_RPF	LC509_tumor_RPF	RFP	10		chx			liver	NONE		tumor	TRUE		TESHOME	RFP_NA_10_NA_liver_NONE_NA_NA_tumor_chx	FALSE	0.808059	0.0307239
PRJNA182756	SRR627624					SRX207949		OTHER	other		SINGLE			ILLUMINA		SRP017378	PRJNA182756	23594524	182756	SRS377850	SAMN01821860			Homo sapiens	GSM1047588	GEO	SRA062117	3	2013	Loayza-Puch	Immortalized primary fibroblasts	preS.rp	RFP		preS	chx			skin	BJ		RASG12V	TRUE		HÃ…KON	RFP_NA_NA_NA_skin_BJ_preS_NA_RASG12V_chx	FALSE	0.78289	0.0376521
PRJNA731488	SRR14605927	23298426	616740422	26	280	SRX10949058		OTHER	other	TRANSCRIPTOMIC	SINGLE	0	0	ILLUMINA	Illumina HiSeq 4000	SRP320683	PRJNA731488	34876589		SRS9027930	SAMN19287228	simple	9606	Homo sapiens	GSM5326932	GEO	SRA1234845	11	2021	Kashiwagi	HEK293 T-REx	Ribo_mut_Tg50	RFP	1					kidney	HEK293		auto_2802	TRUE		auto	RFP_NA_1_NA_kidney_HEK293_NA_NA_auto_2802_NA	FALSE	0.77077	0.0234593
PRJNA509149	SRR8309246					SRX5123176		OTHER	other		SINGLE			ILLUMINA		SRP173217	PRJNA509149	30626644	509149	SRS4136491	SAMN10564076			Homo sapiens	GSM3506278	GEO	SRA822679	12	2018	Walczak	Membrane fraction from UFM1-KO HEK293 cells	ufm1_memb_b	RFP	2	ufm1	chx			kidney	HEK293		memb	TRUE		TESHOME	RFP_NA_2_NA_kidney_HEK293_ufm1_NA_memb_chx	FALSE	0.770147	0.0167386
PRJNA324409	SRR3623939	37265940	1900562940	51	1337	SRX1818910		OTHER	other	TRANSCRIPTOMIC	SINGLE	0	0	ILLUMINA	Illumina HiSeq 2000	SRP076102	PRJNA324409	27525483		SRS1482794	SAMN05202124	simple	9606	Homo sapiens	GSM2186925	GEO	SRA430681	8	2016	Bercovich-Kinori	ribosome profiling_8h	fp_chx_8hr_s4	RFP	1		chx		8h				auto_865	TRUE		auto	RFP_NA_1_8h_NA_NA_NA_NA_auto_865_chx	FALSE	0.767619	0.0362652
PRJNA287879	SRR2075939					SRX1070872		OTHER	other		SINGLE			ILLUMINA		SRP059825	PRJNA287879	27309803	287879	SRS969978	SAMN03788121			Homo sapiens	GSM1720817	GEO	SRA274158	6	2016	Iwasaki	HEK 293 T-Rex_ribo_Hipp1	ribo_Hipp1 [Sample 15]	RFP	1		chx			kidney	HEK293		Hipp1	TRUE		KORNEL	RFP_NA_1_NA_kidney_HEK293_NA_NA_Hipp1_chx	FALSE	0.762046	0.0168416
PRJNA182756	SRR627620					SRX207945		OTHER	other		SINGLE			ILLUMINA		SRP017378	PRJNA182756	23594524	182756	SRS377846	SAMN01821856			Homo sapiens	GSM1047584	GEO	SRA062117	3	2013	Loayza-Puch	Immortalized primary fibroblasts	C1.rp	RFP	1	WT	chx			skin	BJ		RASG12V	TRUE		HÃ…KON	RFP_NA_1_NA_skin_BJ_WT_NA_RASG12V_chx	FALSE	0.757718	0.00749134
PRJNA448763	SRR6939957					SRX3884308		OTHER	other		SINGLE			ILLUMINA		SRP137150	PRJNA448763	31281537	448763	SRS3123580	SAMN08864556			Homo sapiens	GSM3081768	GEO	SRA681490	6	2019	Zou	normal_RPF	LC508_normal_RPF	RFP	9		chx			liver	NONE		normal	TRUE		TESHOME	RFP_NA_9_NA_liver_NONE_NA_NA_normal_chx	FALSE	0.743937	0.36802
PRJNA527204	SRR8732204					SRX5525066		RNA-Seq	cDNA		SINGLE			ILLUMINA		SRP188505	PRJNA527204	31416668	527204	SRS4491747	SAMN11130403			Homo sapiens	GSM3671684	GEO	SRA860677	8	2019	Kwart	APP mutant iPSC-derived neurons	ribosome profiling APP_2	RFP	2	KO	chx			neuron	iPSC		APP	TRUE		TESHOME	RFP_NA_2_NA_neuron_iPSC_KO_NA_APP_chx	FALSE	0.739252	0.0506788
PRJNA527204	SRR8732205					SRX5525067		RNA-Seq	cDNA		SINGLE			ILLUMINA		SRP188505	PRJNA527204	31416668	527204	SRS4491748	SAMN11130402			Homo sapiens	GSM3671685	GEO	SRA860677	8	2019	Kwart	APP mutant iPSC-derived neurons	ribosome profiling APP_3	RFP	3	KO	chx			neuron	iPSC		APP	TRUE		TESHOME	RFP_NA_3_NA_neuron_iPSC_KO_NA_APP_chx	FALSE	0.726843	0.101926
PRJEB5938	ERR466124					ERX432359	Extract 2	OTHER	other		SINGLE			ILLUMINA		ERP005378	PRJEB5938	25550424	272022	ERS426768	SAMEA2421580			Homo sapiens	SAMEA2421580	female	ERA295459	1	2015	Dundee		E-MTAB-2421:U2OS_MN	RFP			chx			bone	U2OS		MN	TRUE		HÃ…KON	RFP_NA_NA_NA_bone_U2OS_NA_NA_MN_chx	FALSE	0.717163	0.0846341
PRJNA655417	SRR12391533					SRX8889968		OTHER	other		SINGLE			ILLUMINA		SRP276055	PRJNA655417	32992958	655417	SRS7149447	SAMN15734838			Homo sapiens	GSM4711316	GEO	SRA1108561	9	2020	Kiltschewskij	SH-SY5Y cell line	depol 2 hours 3 [k2h3.ribo]	RFP	3	depol	chx		2h	brain	SHSY5Y			TRUE		PREETI	RFP_NA_3_2h_brain_SHSY5Y_depol_NA_NA_chx	FALSE	0.713535	0.103441
PRJNA285961	SRR2053003					SRX1050420		OTHER	other		SINGLE			ILLUMINA		SRP059187	PRJNA285961	29321322	285961	SRS954561	SAMN03763431			Homo sapiens	GSM1704595	GEO	SRA271639	9	2016	Reid	Huh7 cells	6 h DENV2 infection Total cell lysate ribosome profiling (rep 2)	RFP	2	infected	chx		6hr	liver	Huh7		DENV2	TRUE		KORNEL	RFP_NA_2_6hr_liver_Huh7_infected_NA_DENV2_chx	FALSE	0.708492	0.0835257
PRJNA740301	SRR14890807	12254080	931310080	76	334	SRX11206960		OTHER	other	TRANSCRIPTOMIC	SINGLE	0	0	ILLUMINA	NextSeq 500	SRP325334	PRJNA740301	1		SRS9261342	SAMN19838081	simple	9606	Homo sapiens	GSM5397175	GEO	SRA1249860	6	2021	Makar	MB135iDUX4 myoblasts	MB135iDUX4-Ribo_14h_rep2	RFP	2									TRUE		auto	RFP_NA_2_NA_NA_NA_NA_NA_NA_NA	FALSE	0.681021	0.0119824
PRJNA238879	SRR1173914					SRX474115		RNA-Seq	cDNA		SINGLE			ILLUMINA		SRP038695	PRJNA238879	25621764	238879	SRS560104	SAMN02646674			Homo sapiens	GSM1331348	GEO	SRA141675	1	2015	Andreev	Hek293T	Arsenite riboseq, replicate 2	RFP	2	arsenite	chx	2		kidney	HEK293			TRUE		HÃ…KON	RFP_2_2_NA_kidney_HEK293_arsenite_NA_NA_chx	FALSE	0.681021	0.00869645
PRJNA523167	SRR8590780					SRX5391050		RNA-Seq	cDNA		SINGLE			ILLUMINA		SRP186252	PRJNA523167	31911279	523167	SRS4378991	SAMN10965465			Homo sapiens	GSM3611937	GEO	SRA850276	12	2019	Vaklavas	Human ER(+) breast cancer	T47D Charcoal Stripped Serum ribosome protected fragments	RFP	1	charcoal	chx			breast	T47D			TRUE		TESHOME	RFP_NA_1_NA_breast_T47D_charcoal_NA_NA_chx	FALSE	0.681021	0.0317421
PRJNA837585	SRR19178808	58942220	5894222000	100	1827	SRX15244120	GSM6135049	OTHER	other	TRANSCRIPTOMIC	SINGLE	0	0	ILLUMINA	Illumina NovaSeq 6000	SRP374956	PRJNA837585	1		SRS12977048	SAMN28207090	simple	9606	Homo sapiens	GSM6135049	Palazzo Lab, Biochemistry, University of Toronto	SRA1419466	5	2022	Makar	kidney	HEK293T Cells, shPKM Rep1, ribo-seq	RFP	1					kidney	HEK293			TRUE		auto	RFP_NA_1_NA_kidney_HEK293_NA_NA_NA_NA	FALSE	0.681021	0.0120699
PRJNA871214	SRR21146248	107840986	8088073950	75	2197	SRX17157957	GSM6481498	OTHER	other	TRANSCRIPTOMIC	SINGLE	0	0	ILLUMINA	Illumina NovaSeq 6000	SRP393125	PRJNA871214	36306790		SRS14729645	SAMN30410516	simple	9606	Homo sapiens	GSM6481498	Guangzhou Laboratory	SRA1479839	11	2022	Weng	Human AML cell MonoMac6	MM6, shBP2-2, ribo, rep1	RFP	1	infected		2		blood	MM6		shBP2	TRUE		Hakon	RFP_2_1_NA_blood_MM6_infected_NA_shBP2_NA	FALSE	0.681021	0.0258499
PRJNA779948	SRR16929296	1931022	66248592	34	26	SRX13121449		OTHER	other	TRANSCRIPTOMIC	SINGLE	0	0	ILLUMINA	NextSeq 550	SRP345769	PRJNA779948	36096941		SRS11056457	SAMN23081847	simple	9606	Homo sapiens	GSM5688486	GEO	SRA1328187	8	2022	Poetz	CPEB4 KO HeLa	condCKO_rep2_RPF	RFP	2	KO				ovary	HeLa	condC		TRUE		auto	RFP_NA_2_NA_ovary_HeLa_KO_condC_NA_NA	FALSE	0.681021	0.00634159
PRJNA181016	SRR619082					SRX205658		RNA-Seq	size fractionation		SINGLE			ILLUMINA		SRP017263	PRJNA181016	23290916	181016	SRS376432	SAMN01816428			Homo sapiens	HEK293_CON_Rep1	CORNELL	SRA061778	7	2015	Liu		HEK293_CON_Rep1	RFP	1	WT	chx			kidney	HEK293			TRUE		HÃ…KON	RFP_NA_1_NA_kidney_HEK293_WT_NA_NA_chx	FALSE	0.681021	0.0239757
PRJNA285961	SRR2052921					SRX1050338		OTHER	other		SINGLE			ILLUMINA		SRP059187	PRJNA285961	29321322	285961	SRS954636	SAMN03763410			Homo sapiens	GSM1704513	GEO	SRA271639	9	2016	Reid	Huh7 cells	Uninfected cytosol ribosome profiling (Rep 1)	RFP	1	WT	chx			liver	Huh7		cyto	TRUE		KORNEL	RFP_NA_1_NA_liver_Huh7_WT_NA_cyto_chx	FALSE	0.681021	0.0180272
PRJNA527204	SRR8732208					SRX5525070		RNA-Seq	cDNA		SINGLE			ILLUMINA		SRP188505	PRJNA527204	31416668	527204	SRS4491751	SAMN11130427			Homo sapiens	GSM3671688	GEO	SRA860677	8	2019	Kwart	PSEN1 mutant iPSC-derived neurons	ribosome profiling PSEN_3	RFP	3	KO	chx			neuron	iPSC		PSEN1	TRUE		TESHOME	RFP_NA_3_NA_neuron_iPSC_KO_NA_PSEN1_chx	FALSE	0.678296	0.0417788
PRJNA303958	SRR2954801	3498569	108974942	31	53	SRX1447297		OTHER	other	TRANSCRIPTOMIC	SINGLE	0	0	ILLUMINA	Illumina HiSeq 2500	SRP066598	PRJNA303958	27232982		SRS1175214	SAMN04288466	simple	9606	Homo sapiens	GSM1948926	GEO	SRA313218	12	2015	Raj	HapMap Lymphoblastoid Cell Line	GM19238 ribosome protected fragments	RFP	1								auto_820	TRUE		auto	RFP_NA_1_NA_NA_NA_NA_NA_auto_820_NA	FALSE	0.672284	0.0121398
PRJNA527204	SRR8732200					SRX5525062		RNA-Seq	cDNA		SINGLE			ILLUMINA		SRP188505	PRJNA527204	31416668	527204	SRS4491743	SAMN11130407			Homo sapiens	GSM3671680	GEO	SRA860677	8	2019	Kwart	wiltype iPSC-derived neurons	ribosome profiling wt_1	RFP	1	WT	chx			neuron	iPSC			TRUE		TESHOME	RFP_NA_1_NA_neuron_iPSC_WT_NA_NA_chx	FALSE	0.666716	0.0603464
PRJNA448763	SRR6939952					SRX3884304		OTHER	other		SINGLE			ILLUMINA		SRP137150	PRJNA448763	31281537	448763	SRS3123577	SAMN08864560			Homo sapiens	GSM3081764	GEO	SRA681490	6	2019	Zou	normal_RPF	LC507_normal_RPF	RFP	8		chx			liver	NONE		normal	TRUE		TESHOME	RFP_NA_8_NA_liver_NONE_NA_NA_normal_chx	FALSE	0.665261	0.155607
PRJEB33244	ERR3403465					ERX3427230	C1RPF_s	RNA-Seq	size fractionation		SINGLE			ILLUMINA		ERP116020	PRJEB33244		706227	ERS3547448	SAMEA5744161			Homo sapiens	E-MTAB-8100:C1RPF	Earlham Institute	ERA2022066	3	2021	Lezina	non-small cell lung carcinoma	C1RPF	RFP	1	KO	chx	1		lung	H1299	p53		TRUE		PREETI	RFP_1_1_NA_lung_H1299_KO_p53_NA_chx	FALSE	0.664772	0.303053
PRJNA448763	SRR6939940					SRX3884292		OTHER	other		SINGLE			ILLUMINA		SRP137150	PRJNA448763	31281537	448763	SRS3123564	SAMN08864574			Homo sapiens	GSM3081752	GEO	SRA681490	6	2019	Zou	normal_RPF	LC502_normal_RPF	RFP	5		chx			liver	NONE		normal	TRUE		TESHOME	RFP_NA_5_NA_liver_NONE_NA_NA_normal_chx	FALSE	0.654766	0.213064
PRJNA448763	SRR6939961					SRX3884312		OTHER	other		SINGLE			ILLUMINA		SRP137150	PRJNA448763	31281537	448763	SRS3123584	SAMN08864552			Homo sapiens	GSM3081772	GEO	SRA681490	6	2019	Zou	normal_RPF	LC509_normal_RPF	RFP	10		chx			liver	NONE		normal	TRUE		TESHOME	RFP_NA_10_NA_liver_NONE_NA_NA_normal_chx	FALSE	0.64679	0.633294
PRJNA448763	SRR6939944					SRX3884296		OTHER	other		SINGLE			ILLUMINA		SRP137150	PRJNA448763	31281537	448763	SRS3123568	SAMN08864570			Homo sapiens	GSM3081756	GEO	SRA681490	6	2019	Zou	normal_RPF	LC505_normal_RPF	RFP	6		chx			liver	NONE		normal	TRUE		TESHOME	RFP_NA_6_NA_liver_NONE_NA_NA_normal_chx	FALSE	0.639871	0.429864
PRJNA453915	SRR7073127					SRX4003575		RNA-Seq	cDNA		SINGLE			ILLUMINA		SRP143452	PRJNA453915	30029003	453915	SRS3225377	SAMN08993014			Homo sapiens	GSM3118934	GEO	SRA696853	7	2018	Darnell	HCT116 cells, NCI-60 panel	hct116_rich_3h	RFP			chx		3h	colon	HCT116		rich	TRUE		TESHOME	RFP_NA_NA_3h_colon_HCT116_NA_NA_rich_chx	FALSE	0.636178	0.140581
PRJNA665035	SRR14667090					SRX11005668		OTHER	other		SINGLE			ILLUMINA		SRP284977	PRJNA665035	32995776	665035	SRS9079688	SAMN19367818			Homo sapiens	GSM5342780	GEO	SRA1129972	6	2021	Rao	non-small cell lung carcinoma	NSP2-H1299-3_ribo	RFP	3	OE	chx			lung	H1299	NSP2		TRUE		PREETI	RFP_NA_3_NA_lung_H1299_OE_NSP2_NA_chx	FALSE	0.628207	0.173095
PRJNA532643	SRR8891622					SRX5676969		OTHER	other		SINGLE			ILLUMINA		SRP192442	PRJNA532643	32522993	532643	SRS4618347	SAMN11408165			Homo sapiens	GSM3721660	GEO	SRA873611	4	2020	Reich	LN308 cell line	LN308-untreated-GCCAAT-R1 (Ribo-Seq)	RFP	1	WT	chx		0h	brain	LN308		Ctrl	TRUE		TESHOME	RFP_NA_1_0h_brain_LN308_WT_NA_Ctrl_chx	FALSE	0.62421	0.176704
PRJNA448763	SRR6939950					SRX3884302		OTHER	other		SINGLE			ILLUMINA		SRP137150	PRJNA448763	31281537	448763	SRS3123574	SAMN08864562			Homo sapiens	GSM3081762	GEO	SRA681490	6	2019	Zou	tumor_RPF	LC506_tumor_RPF	RFP	7		chx			liver	NONE		tumor	TRUE		TESHOME	RFP_NA_7_NA_liver_NONE_NA_NA_tumor_chx	FALSE	0.623801	0.0717292
PRJNA809587	SRR18113803	22991435	3448715250	150	1236	SRX14264378	GSM5911793	OTHER	other	TRANSCRIPTOMIC	SINGLE	0	0	ILLUMINA	Illumina NovaSeq 6000	SRP361145	PRJNA809587	36074823		SRS12083338	SAMN26199030	simple	9606	Homo sapiens	GSM5911793	Wei Xie, School of Life Sciences, Tsinghua University	SRA1376840	10	2022	Zou	Embryonic kidney 293 cell	HEK293_1000_Ribo	RFP	1					kidney	HEK293			TRUE		auto	RFP_NA_1_NA_kidney_HEK293_NA_NA_NA_NA	FALSE	0.615569	0.0219826
PRJNA809587	SRR18113785	95266042	14289906300	150	5079	SRX14264387	GSM5911802	OTHER	other	TRANSCRIPTOMIC	SINGLE	0	0	ILLUMINA	Illumina NovaSeq 6000	SRP361145	PRJNA809587	36074823		SRS12083347	SAMN26199021	simple	9606	Homo sapiens	GSM5911802	Wei Xie, School of Life Sciences, Tsinghua University	SRA1376840	10	2022	Zou	Oocyte	h_MII_10_Ribo_rep2	RFP	2								auto_3345	TRUE		auto	RFP_NA_2_NA_NA_NA_NA_NA_auto_3345_NA	FALSE	0.609655	0.0278846
PRJNA591625	SRR10530128					SRX7214137		OTHER	other		SINGLE			ILLUMINA		SRP233222	PRJNA591625	33330931	591625	SRS5716940	SAMN13385779			Homo sapiens	GSM4192112	GEO	SRA1002630	11	2020	Selmi	human embryonic stem cells	H9.KO3.3.1_Ribo-seq	RFP	1	KO	chx	3		embryonic	H9		1	TRUE		PREETI	RFP_3_1_NA_embryonic_H9_KO_NA_1_chx	FALSE	0.604388	0.0164815
PRJEB33244	ERR3403466					ERX3427230	C1RPF_s	RNA-Seq	size fractionation		SINGLE			ILLUMINA		ERP116020	PRJEB33244		706227	ERS3547448	SAMEA5744161			Homo sapiens	E-MTAB-8100:C1RPF	Earlham Institute	ERA2022066	3	2021	Lezina	non-small cell lung carcinoma	C1RPF	RFP	1	KO	chx	2		lung	H1299	p53		TRUE		PREETI	RFP_2_1_NA_lung_H1299_KO_p53_NA_chx	FALSE	0.601478	0.470587
PRJNA453915	SRR7073128					SRX4003576		RNA-Seq	cDNA		SINGLE			ILLUMINA		SRP143452	PRJNA453915	30029003	453915	SRS3225378	SAMN08993047			Homo sapiens	GSM3118935	GEO	SRA696853	7	2018	Darnell	HeLa cells, ATCC CCL-2	hela_arg_mono_3h	RFP			chx		3h	ovary	HeLa		arg_mono	TRUE		TESHOME	RFP_NA_NA_3h_ovary_HeLa_NA_NA_arg_mono_chx	FALSE	0.592085	0.42902
PRJEB33244	ERR3403490					ERX3427242	W1RPF_s	RNA-Seq	size fractionation		SINGLE			ILLUMINA		ERP116020	PRJEB33244		706227	ERS3547460	SAMEA5744173			Homo sapiens	E-MTAB-8100:W1RPF	Earlham Institute	ERA2022066	3	2021	Lezina	non-small cell lung carcinoma	W1RPF	RFP	1	KO_rescue	chx	2		lung	H1299	p53		TRUE		PREETI	RFP_2_1_NA_lung_H1299_KO_rescue_p53_NA_chx	FALSE	0.59137	0.532146
PRJNA275305	SRR1802140					SRX876057		OTHER	other		SINGLE			ILLUMINA		SRP054971	PRJNA275305	26900662	275305	SRS844812	SAMN03342119			Homo sapiens	GSM1608279	GEO	SRA240809	11	2015	Ji	Breast epithelial cell	ERSrcTAM01hr_chx_rep2	RFP	2	KO	chx		1hr	breast	NONE		ER_SrcTAM	TRUE		KORNEL	RFP_NA_2_1hr_breast_NONE_KO_NA_ER_SrcTAM_chx	FALSE	0.588039	0.0582062
PRJNA181016	SRR619086					SRX205664		RNA-Seq	size fractionation		SINGLE			ILLUMINA		SRP017263	PRJNA181016	23290916	181016	SRS376438	SAMN01816432			Homo sapiens	HEK293_AZC	CORNELL	SRA061778	7	2015	Liu		HEK293_AZC	RFP		AZC	chx			kidney	HEK293			TRUE		HÃ…KON	RFP_NA_NA_NA_kidney_HEK293_AZC_NA_NA_chx	FALSE	0.587684	0.0281895
PRJNA523167	SRR8590768					SRX5391046		RNA-Seq	cDNA		SINGLE			ILLUMINA		SRP186252	PRJNA523167	31911279	523167	SRS4378987	SAMN10965469			Homo sapiens	GSM3611933	GEO	SRA850276	12	2019	Vaklavas	adult human female breast, fibrocystic disease	MCF10A Serum Deprived ribosome protected fragments	RFP	1	deprived	chx			breast	MCF10A			TRUE		TESHOME	RFP_NA_1_NA_breast_MCF10A_deprived_NA_NA_chx	FALSE	0.587345	0.0218292
PRJNA854905	SRR19918560	16507948	825397400	50	421	SRX15961064	GSM6284784	OTHER	other	TRANSCRIPTOMIC	SINGLE	0	0	ILLUMINA	Illumina HiSeq 2500	SRP384536	PRJNA854905	35891396		SRS13647406	SAMN29472424	simple	9606	Homo sapiens	GSM6284784	Kamini Singh, Molecular Pharmacology, Albert Einstein College of Medicine	SRA1447869	7	2022	Singh	primary hNPC	A1_ribo	RFP	8					throat	NPC			TRUE		auto	RFP_NA_8_NA_throat_NPC_NA_NA_NA_NA	FALSE	0.587345	0.0247692
PRJNA801861	SRR17818678	115526952	8664521400	75	2458	SRX13980547	GSM5848575	OTHER	other	TRANSCRIPTOMIC	SINGLE	0	0	ILLUMINA	Illumina NovaSeq 6000	SRP357375	PRJNA801861	1		SRS11817870	SAMN25408096	simple	9606	Homo sapiens	GSM5848575	????	SRA1364092	2	2022	Makar	cervical cancer	HeLaA3KO_2R for Ribo-seq	RFP	1	KO				ovary	HeLa	HeLaA3	auto_3299	TRUE		auto	RFP_NA_1_NA_ovary_HeLa_KO_HeLaA3_auto_3299_NA	FALSE	0.582809	0.259345
PRJNA527204	SRR8732201					SRX5525063		RNA-Seq	cDNA		SINGLE			ILLUMINA		SRP188505	PRJNA527204	31416668	527204	SRS4491744	SAMN11130406			Homo sapiens	GSM3671681	GEO	SRA860677	8	2019	Kwart	wiltype iPSC-derived neurons	ribosome profiling wt_2	RFP	2	WT	chx			neuron	iPSC			TRUE		TESHOME	RFP_NA_2_NA_neuron_iPSC_WT_NA_NA_chx	FALSE	0.581067	0.079757
PRJNA729461	SRR14510069	38186961	885680514	23	393	SRX10855882		OTHER	other	TRANSCRIPTOMIC	SINGLE	0	0	ILLUMINA	Illumina NovaSeq 6000	SRP319472	PRJNA729461	34226921		SRS8951513	SAMN19116448	simple	9606	Homo sapiens	GSM5291913	GEO	SRA1231346	7	2021	Ichihara	HEK293T cells	eIF2D KO HEK293T #1 arsenite Ribo-seq replicate 2	RFP	2	KO				kidney	HEK293	eIF2D	auto_2781	TRUE		auto	RFP_NA_2_NA_kidney_HEK293_KO_eIF2D_auto_2781_NA	FALSE	0.574616	0.0503566
PRJNA310107	SRR3131023					SRX1550684		RNA-Seq	cDNA		SINGLE			ILLUMINA		SRP069011	PRJNA310107	27259150	310107	SRS1267360	SAMN04446367			Homo sapiens	GSM2049924	GEO	SRA342556	6	2016	Goodarzi	MDA-parental	MDA-glu-RPF-rep1-readlane3	RFP	1	glu	chx			breast	MDA		lane3	TRUE		HÃ…KON	RFP_NA_1_NA_breast_MDA_glu_NA_lane3_chx	FALSE	0.57162	0.0558041
PRJNA278390	SRR1916550					SRX957359		RNA-Seq	cDNA		SINGLE			ILLUMINA		SRP056200	PRJNA278390	26538417	278390	SRS874703	SAMN03418228			Homo sapiens	GSM1634451	GEO	SRA246838	11	2015	Elkon	U2OS, Myc activation + Torin-1	Myc.Torin.rp.lane1	RFP	1	treated	chx	1		bone	U2OS		Myc_Torin	TRUE		KORNEL	RFP_1_1_NA_bone_U2OS_treated_NA_Myc_Torin_chx	FALSE	0.57162	0.0194604
PRJNA453915	SRR7073129					SRX4003577		RNA-Seq	cDNA		SINGLE			ILLUMINA		SRP143452	PRJNA453915	30029003	453915	SRS3225379	SAMN08993046			Homo sapiens	GSM3118936	GEO	SRA696853	7	2018	Darnell	HeLa cells, ATCC CCL-2	hela_leu_mono_3h	RFP			chx		3h	ovary	HeLa		leu_mono	TRUE		TESHOME	RFP_NA_NA_3h_ovary_HeLa_NA_NA_leu_mono_chx	FALSE	0.567649	0.105946
PRJDB15060	DRR428606	10723366	536168300	50	254	DRX413781		OTHER	other	TRANSCRIPTOMIC	SINGLE	0	0	ILLUMINA	Illumina HiSeq 2500	DRP009580	PRJDB15060	1		DRS279344	SAMD00571141	simple	9606	Homo sapiens	SAMD00571141	KUMAMOTO	DRA015477	2	2023	Makar		K562 cells treated with CX5461, replicate 1	RFP	1	CX5461				bone	K562			TRUE		Michal	RFP_NA_1_NA_bone_K562_CX5461_NA_NA_NA	FALSE	0.560445	0.0656385
PRJNA223608	SRR1598975					SRX367000		RNA-Seq	cDNA		SINGLE			ILLUMINA		SRP031849	PRJNA223608	25070500	223608	SRS493126	SAMN02380975			Homo sapiens	GSM1248729	GEO	SRA107958	7	2015	Guo	U2OS cells	miR-1-transfected ribosome profiling	RFP	1	mir1	chx			bone	U2OS			TRUE		HÃ…KON	RFP_NA_1_NA_bone_U2OS_mir1_NA_NA_chx	FALSE	0.556846	0.198795
PRJNA258219	SRR1551159					SRX680698		RNA-Seq	cDNA		SINGLE			ILLUMINA		SRP045501	PRJNA258219	25263593	258219	SRS684376	SAMN02990369			Homo sapiens	GSM1479592	GEO	SRA179319	7	2015	Eichhorn	U2OS cell line	miR-1-transfected U2OS RPF	RFP		mir1	chx			bone	U2OS			TRUE		HÃ…KON	RFP_NA_NA_NA_bone_U2OS_mir1_NA_NA_chx	FALSE	0.555858	0.221822
PRJNA756018	SRR15513150	89615744	3171868897	35	1305	SRX11811944		RNA-Seq	cDNA	TRANSCRIPTOMIC	SINGLE	0	0	ILLUMINA	NextSeq 500	SRP333128	PRJNA756018	35841888		SRS9826462	SAMN20849935	simple	9606	Homo sapiens	GSM5527675	GEO	SRA1280330	7	2022	Chothani	untreated normal human brain tissue	Brain_3 (RiboSeq)	RFP	1					brain			auto_2972	TRUE		auto	RFP_NA_1_NA_brain_NA_NA_NA_auto_2972_NA	FALSE	0.552408	0.318625
PRJNA285961	SRR2052914					SRX1050331		OTHER	other		SINGLE			ILLUMINA		SRP059187	PRJNA285961	29321322	285961	SRS954643	SAMN03763403			Homo sapiens	GSM1704506	GEO	SRA271639	9	2016	Reid	Huh7 cells	12 h infection ER ribosome profiling (Rep 1)	RFP	1	infected	chx		12hr	liver	Huh7		ER	TRUE		KORNEL	RFP_NA_1_12hr_liver_Huh7_infected_NA_ER_chx	FALSE	0.549812	0.0608778
PRJNA285961	SRR2052990					SRX1050407		OTHER	other		SINGLE			ILLUMINA		SRP059187	PRJNA285961	29321322	285961	SRS954574	SAMN03763474			Homo sapiens	GSM1704582	GEO	SRA271639	9	2016	Reid	Huh7 cells	24 h DENV1 infection Total cell lysate ribosome profiling (rep 2)	RFP	2	infected	chx		24hr	liver	Huh7		DENV1	TRUE		KORNEL	RFP_NA_2_24hr_liver_Huh7_infected_NA_DENV1_chx	FALSE	0.548826	0.0128274
PRJNA542601	SRR9047199					SRX5823722		RNA-Seq	cDNA		SINGLE			ILLUMINA		SRP198221	PRJNA542601	32589965	542601	SRS4751822	SAMN11634334			Homo sapiens	GSM3763002	GEO	SRA885670	6	2020	Lin	MCF10-A cell line	si_ctrl_1_TL	RFP	1	Ctrl	chx			breast	MCF10A		KD	TRUE		TESHOME	RFP_NA_1_NA_breast_MCF10A_Ctrl_NA_KD_chx	FALSE	0.548478	0.103726
PRJEB33244	ERR3403470					ERX3427232	C2RPF_s	RNA-Seq	size fractionation		SINGLE			ILLUMINA		ERP116020	PRJEB33244		706227	ERS3547450	SAMEA5744163			Homo sapiens	E-MTAB-8100:C2RPF	Earlham Institute	ERA2022066	3	2021	Lezina	non-small cell lung carcinoma	C2RPF	RFP	2	KO	chx	2		lung	H1299	p53		TRUE		PREETI	RFP_2_2_NA_lung_H1299_KO_p53_NA_chx	FALSE	0.547556	0.332994
PRJNA837585	SRR19178809	55528582	5552858200	100	1707	SRX15244121	GSM6135050	OTHER	other	TRANSCRIPTOMIC	SINGLE	0	0	ILLUMINA	Illumina NovaSeq 6000	SRP374956	PRJNA837585	1		SRS12977049	SAMN28207089	simple	9606	Homo sapiens	GSM6135050	Palazzo Lab, Biochemistry, University of Toronto	SRA1419466	5	2022	Makar	kidney	HEK293T Cells, shPKM Rep2, ribo-seq	RFP	2					kidney	HEK293			TRUE		auto	RFP_NA_2_NA_kidney_HEK293_NA_NA_NA_NA	FALSE	0.542665	0.0153271
PRJNA533074	SRR8907201					SRX5693022		OTHER	other		SINGLE			ILLUMINA		SRP192707	PRJNA533074	31167946	533074	SRS4632506	SAMN11433224			Homo sapiens	GSM3723766	GEO	SRA874614	5	2019	Holmes	Human Foreskin Fibroblasts and RH Toxoplasma	Riboseq_subconfluentHFF-RH_rep2	RFP	2		chx		24h	skin	SCRC1041		infe	TRUE		TESHOME	RFP_NA_2_24h_skin_SCRC1041_NA_NA_infe_chx	FALSE	0.542115	0.0581252
PRJNA748058	SRR15193578	31356645	965632271	30	427	SRX11500211		OTHER	other	TRANSCRIPTOMIC	SINGLE	0	0	ILLUMINA	NextSeq 500	SRP328974	PRJNA748058	34774131		SRS9539161	SAMN20307379	simple	9606	Homo sapiens	GSM5462323	GEO	SRA1261287	1	2023	SchÃ¶ller	Cell Culture	HEK 293 METTL8 overexpression mitoribosome profiling	RFP	1								mito	TRUE		auto	RFP_NA_1_NA_NA_NA_NA_NA_mito_NA	FALSE	0.541791	0.0156738
PRJNA453915	SRR7073126					SRX4003574		RNA-Seq	cDNA		SINGLE			ILLUMINA		SRP143452	PRJNA453915	30029003	453915	SRS3225376	SAMN08993035			Homo sapiens	GSM3118933	GEO	SRA696853	7	2018	Darnell	HCT116 cells, NCI-60 panel	hct116_leu_3h	RFP			chx		3h	colon	HCT116		leu	TRUE		TESHOME	RFP_NA_NA_3h_colon_HCT116_NA_NA_leu_chx	FALSE	0.537988	0.139955
PRJNA147613	SRR648670					SRX217031		RNA-Seq	other		SINGLE			ILLUMINA		SRP017942	PRJNA147613	23290915	147613	SRS385798	SAMN01886426			Homo sapiens	GSM1063578	GEO	SRA064749	7	2015	Shalgi	293T cells	293T_Hspa1a_2hrs_severe_Heat_Shock	RFP		HS	chx		2h	kidney	HEK293		HSPA1A	TRUE		HÃ…KON	RFP_NA_NA_2h_kidney_HEK293_HS_NA_HSPA1A_chx	FALSE	0.535739	0.109004
PRJEB33244	ERR3403469					ERX3427232	C2RPF_s	RNA-Seq	size fractionation		SINGLE			ILLUMINA		ERP116020	PRJEB33244		706227	ERS3547450	SAMEA5744163			Homo sapiens	E-MTAB-8100:C2RPF	Earlham Institute	ERA2022066	3	2021	Lezina	non-small cell lung carcinoma	C2RPF	RFP	2	KO	chx	1		lung	H1299	p53		TRUE		PREETI	RFP_1_2_NA_lung_H1299_KO_p53_NA_chx	FALSE	0.533849	0.335569
PRJNA472636	SRR7207280					SRX4116265		OTHER	other		SINGLE			ILLUMINA		SRP148767	PRJNA472636	30089253	472636	SRS3331553	SAMN09238861			Homo sapiens	GSM3150292	GEO	SRA709715	7	2018	Gameiro	Breast epithelial cell	EtOH_NoBCAA_04hr.3	RFP	3	NoBCAA	chx		4h	breast	MCF10A		EtOH	TRUE		TESHOME	RFP_NA_3_4h_breast_MCF10A_NoBCAA_NA_EtOH_chx	FALSE	0.531949	0.0504684
PRJNA677870	SRR14824512	146573353	5274013725	35	2877	SRX11154146		OTHER	other	TRANSCRIPTOMIC	SINGLE	0	0	ILLUMINA	HiSeq X Ten	SRP292287	PRJNA677870	34352206		SRS9215782	SAMN19716270	simple	9606	Homo sapiens	GSM5386899	GEO	SRA1157794	8	2021	Dai	intrahepatic cholangiocarcinoma cell line	Knockdown_RiboSeq_2	RFP	1	KD								TRUE		auto	RFP_NA_1_NA_NA_NA_KD_NA_NA_NA	FALSE	0.531735	0.36731
PRJNA275305	SRR1802138					SRX876055		OTHER	other		SINGLE			ILLUMINA		SRP054971	PRJNA275305	26900662	275305	SRS844814	SAMN03342128			Homo sapiens	GSM1608277	GEO	SRA240809	11	2015	Ji	Breast epithelial cell	ERSrcEtOH04hr_chx_rep2	RFP	2	KO	chx		4hr	breast	NONE		ER_SrcEtOH	TRUE		KORNEL	RFP_NA_2_4hr_breast_NONE_KO_NA_ER_SrcEtOH_chx	FALSE	0.531692	0.10322
PRJNA448763	SRR6939928					SRX3884280		OTHER	other		SINGLE			ILLUMINA		SRP137150	PRJNA448763	31281537	448763	SRS3123552	SAMN08864586			Homo sapiens	GSM3081740	GEO	SRA681490	6	2019	Zou	normal_RPF	LC033_normal_RPF	RFP	2		chx			liver	NONE		normal	TRUE		TESHOME	RFP_NA_2_NA_liver_NONE_NA_NA_normal_chx	FALSE	0.531691	0.195252
PRJNA756018	SRR15513149	145676168	5168784760	35	2231	SRX11811943		RNA-Seq	cDNA	TRANSCRIPTOMIC	SINGLE	0	0	ILLUMINA	NextSeq 500	SRP333128	PRJNA756018	35841888		SRS9826461	SAMN20849934	simple	9606	Homo sapiens	GSM5527674	GEO	SRA1280330	7	2022	Chothani	untreated normal human brain tissue	Brain_2 (RiboSeq)	RFP	1					brain			auto_2971	TRUE		auto	RFP_NA_1_NA_brain_NA_NA_NA_auto_2971_NA	FALSE	0.52709	0.320972
PRJNA940173	SRR23678228	79573484	2710045196	34	990	SRX19541067	GSM7074858	OTHER	other	TRANSCRIPTOMIC	SINGLE	0	0	ILLUMINA	Illumina NovaSeq 6000	SRP425191	PRJNA940173	1		SRS16926838	SAMN33556611	simple	9606	Homo sapiens	GSM7074858	Molecular and Cell Biology, University of California, Berkeley	SRA1597937	3	2023	Makar	K562	K562 CEBPA reporter cell line, PELO sgRNA ribo PI, biol rep 1	RFP	1					bone	K562	PELO	PI	TRUE		Michal	RFP_NA_1_NA_bone_K562_NA_PELO_PI_NA	FALSE	0.52676	0.0233691
PRJNA677870	SRR14824510	160456445	5727150497	35	3125	SRX11154144		OTHER	other	TRANSCRIPTOMIC	SINGLE	0	0	ILLUMINA	HiSeq X Ten	SRP292287	PRJNA677870	34352206		SRS9215780	SAMN19716272	simple	9606	Homo sapiens	GSM5386897	GEO	SRA1157794	8	2021	Dai	intrahepatic cholangiocarcinoma cell line	WT_RiboSeq_1	RFP	1	WT								TRUE		auto	RFP_NA_1_NA_NA_NA_WT_NA_NA_NA	FALSE	0.526013	0.20052
PRJNA665035	SRR14667089					SRX11005667		OTHER	other		SINGLE			ILLUMINA		SRP284977	PRJNA665035	32995776	665035	SRS9079687	SAMN19367819			Homo sapiens	GSM5342779	GEO	SRA1129972	6	2021	Rao	non-small cell lung carcinoma	NSP2-H1299-2_ribo	RFP	2	OE	chx			lung	H1299	NSP2		TRUE		PREETI	RFP_NA_2_NA_lung_H1299_OE_NSP2_NA_chx	FALSE	0.525985	0.0863292
PRJNA287879	SRR2075938					SRX1070871		OTHER	other		SINGLE			ILLUMINA		SRP059825	PRJNA287879	27309803	287879	SRS969975	SAMN03788120			Homo sapiens	GSM1720816	GEO	SRA274158	6	2016	Iwasaki	HEK 293 T-Rex_ribo_Hipp001	ribo_Hipp001 [Sample 14]	RFP	1		chx			kidney	HEK293		Hipp001	TRUE		KORNEL	RFP_NA_1_NA_kidney_HEK293_NA_NA_Hipp001_chx	FALSE	0.525213	0.0697082
PRJNA453915	SRR7073145					SRX4003593		RNA-Seq	cDNA		SINGLE			ILLUMINA		SRP143452	PRJNA453915	30029003	453915	SRS3225395	SAMN08993024			Homo sapiens	GSM3118952	GEO	SRA696853	7	2018	Darnell	HEK293T cells, ATCC CRL-3216 + AAVS1:hrGFP	hrgfp_rich_6h	RFP			chx		6h	kidney	HEK293		hrgfp_rich	TRUE		TESHOME	RFP_NA_NA_6h_kidney_HEK293_NA_NA_hrgfp_rich_chx	FALSE	0.524416	0.0505593
PRJEB33244	ERR3403489					ERX3427242	W1RPF_s	RNA-Seq	size fractionation		SINGLE			ILLUMINA		ERP116020	PRJEB33244		706227	ERS3547460	SAMEA5744173			Homo sapiens	E-MTAB-8100:W1RPF	Earlham Institute	ERA2022066	3	2021	Lezina	non-small cell lung carcinoma	W1RPF	RFP	1	KO_rescue	chx	1		lung	H1299	p53		TRUE		PREETI	RFP_1_1_NA_lung_H1299_KO_rescue_p53_NA_chx	FALSE	0.522523	0.420632
PRJNA665035	SRR12693497					SRX9173295		OTHER	other		SINGLE			ILLUMINA		SRP284977	PRJNA665035	32995776	665035	SRS7410873	SAMN16238711			Homo sapiens	GSM4798524	GEO	SRA1129972	10	2020	Rao	HEK293	NSP2-HEK-3_ribo	RFP	3	OE	chx			kidney	HEK293	NSP2		TRUE		PREETI	RFP_NA_3_NA_kidney_HEK293_OE_NSP2_NA_chx	FALSE	0.522245	0.282645
PRJNA147613	SRR648668					SRX217029		RNA-Seq	other		SINGLE			ILLUMINA		SRP017942	PRJNA147613	23290915	147613	SRS385796	SAMN01886424			Homo sapiens	GSM1063576	GEO	SRA064749	7	2015	Shalgi	293T cells	293T_GFP_2hrs_severe_Heat_Shock	RFP		HS	chx		2h	kidney	HEK293		GFP	TRUE		HÃ…KON	RFP_NA_NA_2h_kidney_HEK293_HS_NA_GFP_chx	FALSE	0.521618	0.127555
PRJNA756018	SRR15513148	146169387	5172116333	35	2237	SRX11811942		RNA-Seq	cDNA	TRANSCRIPTOMIC	SINGLE	0	0	ILLUMINA	NextSeq 500	SRP333128	PRJNA756018	35841888		SRS9826460	SAMN20849933	simple	9606	Homo sapiens	GSM5527673	GEO	SRA1280330	7	2022	Chothani	untreated normal human brain tissue	Brain_1 (RiboSeq)	RFP	1					brain				TRUE		auto	RFP_NA_1_NA_brain_NA_NA_NA_NA_NA	FALSE	0.520073	0.319079
PRJNA740301	SRR14890805	19485233	1480877708	76	514	SRX11206958		OTHER	other	TRANSCRIPTOMIC	SINGLE	0	0	ILLUMINA	NextSeq 500	SRP325334	PRJNA740301	1		SRS9261340	SAMN19838083	simple	9606	Homo sapiens	GSM5397173	GEO	SRA1249860	6	2021	Makar	MB135iDUX4 myoblasts	MB135iDUX4-Ribo_08h_rep3	RFP	3				8h					TRUE		auto	RFP_NA_3_8h_NA_NA_NA_NA_NA_NA	FALSE	0.516324	0.0417523
PRJNA533132	SRR8915512	42861569	3257479244	76	1230	SRX5696966		OTHER	other	TRANSCRIPTOMIC	SINGLE	0	0	ILLUMINA	NextSeq 500	SRP192770	PRJNA533132	1		SRS4636174	SAMN11440438	simple	9606	Homo sapiens	GSM3724999	GEO	SRA875251	8	2022	Makar	ribosome profiling	#NAME?	RFP	2								auto_1346	TRUE		auto	RFP_NA_2_NA_NA_NA_NA_NA_auto_1346_NA	FALSE	0.516324	0.0195134
PRJNA667051	SRR15324717	11804120	318585914	26	141	SRX11629096		OTHER	other	TRANSCRIPTOMIC	SINGLE	0	0	ILLUMINA	NextSeq 500	SRP286182	PRJNA667051	35604092		SRS9662997	SAMN20521082	simple	9606	Homo sapiens	GSM5494617	GEO	SRA1137052	8	2021	Puray-Chavez	Primary human bronchial epithelial cells	Ribo-seq-HBEC-mock-96hp-rep1	RFP	1								auto_2377	TRUE		auto	RFP_NA_1_NA_NA_NA_NA_NA_auto_2377_NA	FALSE	0.516324	0.00623451
PRJNA809587	SRR18113809	10118344	1517751600	150	542	SRX14264375	GSM5911790	OTHER	other	TRANSCRIPTOMIC	SINGLE	0	0	ILLUMINA	Illumina NovaSeq 6000	SRP361145	PRJNA809587	36074823		SRS12083335	SAMN26199033	simple	9606	Homo sapiens	GSM5911790	Wei Xie, School of Life Sciences, Tsinghua University	SRA1376840	10	2022	Zou	Preimplantation embryo	h_4cell_3PN_20_Ribo_rep2	RFP	1				1h				auto_3325	TRUE		auto	RFP_NA_1_1h_NA_NA_NA_NA_auto_3325_NA	FALSE	0.516324	0.0131417
PRJNA809587	SRR18113788	33289106	4993365900	150	2000	SRX14264385	GSM5911800	OTHER	other	TRANSCRIPTOMIC	SINGLE	0	0	ILLUMINA	Illumina NovaSeq 6000	SRP361145	PRJNA809587	36074823		SRS12083345	SAMN26199023	simple	9606	Homo sapiens	GSM5911800	Wei Xie, School of Life Sciences, Tsinghua University	SRA1376840	10	2022	Zou	Oocyte	h_MI_19_Ribo_rep2	RFP	1								auto_3340	TRUE		auto	RFP_NA_1_NA_NA_NA_NA_NA_auto_3340_NA	FALSE	0.516324	0.0165835
PRJNA385767	SRR5515145	14287412	448876581	31	241	SRX2788524		OTHER	other	TRANSCRIPTOMIC	SINGLE	0	0	ILLUMINA	Illumina HiSeq 2500	SRP106608	PRJNA385767	28920958		SRS2170088	SAMN06909556	simple	9606	Homo sapiens	GSM2602086	GEO	SRA560458	9	2017	Vu	MOLM13 ribosome-depleted RNA	MOLM13 METTL3 shRNA #9 Ribo-seq rep 2	RFP	2									TRUE		auto	RFP_NA_2_NA_NA_NA_NA_NA_NA_NA	FALSE	0.516324	0.00399724
PRJNA576653	SRR10251308					SRX6969314		RNA-Seq	cDNA		SINGLE			ILLUMINA		SRP224956	PRJNA576653	31971508	576653	SRS5494880	SAMN13000233			Homo sapiens	GSM4114802	GEO	SRA975938	1	2020	Wangen	Untreated ribosome profiling A	RPF_28_Calu6_1_Untr_A	RFP	1		chx	1		lung	Calu6		untreated	TRUE		PREETI	RFP_1_1_NA_lung_Calu6_NA_NA_untreated_chx	FALSE	0.516324	0.0107445
PRJNA310107	SRR3131015					SRX1550676		RNA-Seq	cDNA		SINGLE			ILLUMINA		SRP069011	PRJNA310107	27259150	310107	SRS1267369	SAMN04446359			Homo sapiens	GSM2049916	GEO	SRA342556	6	2016	Goodarzi	MDA-parental	MDA-glu-RPF-rep2-readlane1	RFP	2	glu	chx			breast	MDA		lane1	TRUE		HÃ…KON	RFP_NA_2_NA_breast_MDA_glu_NA_lane1_chx	FALSE	0.516324	0.0201842
PRJNA310107	SRR3131016					SRX1550677		RNA-Seq	cDNA		SINGLE			ILLUMINA		SRP069011	PRJNA310107	27259150	310107	SRS1267368	SAMN04446360			Homo sapiens	GSM2049917	GEO	SRA342556	6	2016	Goodarzi	MDA-parental	MDA-glu-RPF-rep2-readlane2	RFP	2	glu	chx			breast	MDA		lane2	TRUE		HÃ…KON	RFP_NA_2_NA_breast_MDA_glu_NA_lane2_chx	FALSE	0.516324	0.0208237
PRJNA542670	SRR9049052					SRX5825554		OTHER	other		SINGLE			ILLUMINA		SRP198270	PRJNA542670	31284728	542670	SRS4753608	SAMN11635147			Homo sapiens	GSM3763596	GEO	SRA885795	10	2019	Chothani	Left ventricle tissue of end-stage DCM patients	Left ventricle tissue of end-stage DCM patients (20AP01457)	RFP	1		chx			heart	NONE			TRUE		TESHOME	RFP_NA_1_NA_heart_NONE_NA_NA_NA_chx	FALSE	0.516324	0.0103737
PRJNA406823	SRR6026780	1935766	52661924	27	12	SRX3177238		RNA-Seq	cDNA	TRANSCRIPTOMIC	SINGLE	0	0	ILLUMINA	NextSeq 500	SRP117282	PRJNA406823	30257221		SRS2506906	SAMN07629900	simple	9606	Homo sapiens	GSM2779676	GEO	SRA607220	1	2018	Woo	HEK293 cells	THAP_Riboseq_rep4	RFP	4					kidney	HEK293			TRUE		auto	RFP_NA_4_NA_kidney_HEK293_NA_NA_NA_NA	FALSE	0.516324	0.00788621
PRJNA415390	SRR6202814					SRX3312736		OTHER	other		SINGLE			ILLUMINA		SRP120964	PRJNA415390	31601799	415390	SRS2618691	SAMN07822286			Homo sapiens	GSM2828166	GEO	SRA622650	8	2019	Kuppers	Ribosome protected RNA library from NTC sgRNA HEL cells	NTCribo_2	RFP	2		chx			blood	HEL		NTC	TRUE		TESHOME	RFP_NA_2_NA_blood_HEL_NA_NA_NTC_chx	FALSE	0.516324	0.0111216
PRJNA515197	SRR8443308					SRX5250476		OTHER	other		SINGLE			ILLUMINA		SRP179458	PRJNA515197	31171704	515197	SRS4252124	SAMN10743996			Homo sapiens	GSM3562582	GEO	SRA834884	6	2019	Kearse	Vehicle-treated, HeLa cells	Vehicle-treated, replicate A footprints	RFP	1		chx			ovary	HeLa			TRUE		TESHOME	RFP_NA_1_NA_ovary_HeLa_NA_NA_NA_chx	FALSE	0.516324	0.00697309
PRJNA779948	SRR16929291	2240699	71770521	32	29	SRX13121444		OTHER	other	TRANSCRIPTOMIC	SINGLE	0	0	ILLUMINA	NextSeq 550	SRP345769	PRJNA779948	36096941		SRS11056452	SAMN23081842	simple	9606	Homo sapiens	GSM5688481	GEO	SRA1328187	8	2022	Poetz	parental HeLa	condHeLa_rep1_RPF	RFP	1					ovary	HeLa			TRUE		auto	RFP_NA_1_NA_ovary_HeLa_NA_NA_NA_NA	FALSE	0.516324	0.00686119
PRJNA779948	SRR16929292	1338613	41935840	31	17	SRX13121445		OTHER	other	TRANSCRIPTOMIC	SINGLE	0	0	ILLUMINA	NextSeq 550	SRP345769	PRJNA779948	36096941		SRS11056453	SAMN23081843	simple	9606	Homo sapiens	GSM5688482	GEO	SRA1328187	8	2022	Poetz	parental HeLa	condHeLa_rep2_RPF	RFP	2					ovary	HeLa			TRUE		auto	RFP_NA_2_NA_ovary_HeLa_NA_NA_NA_NA	FALSE	0.516324	0.00620404
PRJNA285961	SRR2052927					SRX1050344		OTHER	other		SINGLE			ILLUMINA		SRP059187	PRJNA285961	29321322	285961	SRS954632	SAMN03763416			Homo sapiens	GSM1704519	GEO	SRA271639	9	2016	Reid	Huh7 cells	24 h infection cytosol ribosome profiling (Rep 2)	RFP	2	infected	chx		24hr	liver	Huh7		cyto	TRUE		KORNEL	RFP_NA_2_24hr_liver_Huh7_infected_NA_cyto_chx	FALSE	0.516324	0.0058756
PRJNA285961	SRR2052993					SRX1050410		OTHER	other		SINGLE			ILLUMINA		SRP059187	PRJNA285961	29321322	285961	SRS954571	SAMN03763477			Homo sapiens	GSM1704585	GEO	SRA271639	9	2016	Reid	Huh7 cells	72 h DENV1 infection Total cell lysate ribosome profiling (rep 2)	RFP	2	infected	chx		72hr	liver	Huh7		DENV1	TRUE		KORNEL	RFP_NA_2_72hr_liver_Huh7_infected_NA_DENV1_chx	FALSE	0.516324	0.0193639
PRJNA285961	SRR2052916					SRX1050333		OTHER	other		SINGLE			ILLUMINA		SRP059187	PRJNA285961	29321322	285961	SRS954642	SAMN03763405			Homo sapiens	GSM1704508	GEO	SRA271639	9	2016	Reid	Huh7 cells	24 h infection ER ribosome profiling (Rep 1)	RFP	1	infected	chx		24hr	liver	Huh7		ER	TRUE		KORNEL	RFP_NA_1_24hr_liver_Huh7_infected_NA_ER_chx	FALSE	0.516324	0.0268314
PRJNA285961	SRR2052942					SRX1050359		OTHER	other		SINGLE			ILLUMINA		SRP059187	PRJNA285961	29321322	285961	SRS954616	SAMN03763371			Homo sapiens	GSM1704534	GEO	SRA271639	9	2016	Reid	Huh7 cells	40 h infection ER ribosome profiling (Rep 3)	RFP	3	infected	chx		40hr	liver	Huh7		ER	TRUE		KORNEL	RFP_NA_3_40hr_liver_Huh7_infected_NA_ER_chx	FALSE	0.516324	0.0105415
PRJNA285961	SRR2052924					SRX1050341		OTHER	other		SINGLE			ILLUMINA		SRP059187	PRJNA285961	29321322	285961	SRS954634	SAMN03763413			Homo sapiens	GSM1704516	GEO	SRA271639	9	2016	Reid	Huh7 cells	6 h infection ER ribosome profiling (Rep 2)	RFP	2	infected	chx		6hr	liver	Huh7		ER	TRUE		KORNEL	RFP_NA_2_6hr_liver_Huh7_infected_NA_ER_chx	FALSE	0.516324	0.0587045
PRJNA401882	SRR5990840					SRX3146524		OTHER	cDNA		SINGLE			ILLUMINA		SRP131318	PRJNA401882	29696588	401882	SRS2478483	SAMN07573553			Homo sapiens	GSM2760257	GEO	SRA604097	5	2018	Lin	muscle and virus	Infect, 6.25 h, RPF, rep1	RFP	1	infected	chx	5	6h	muscle	NONE			TRUE		TESHOME	RFP_5_1_6h_muscle_NONE_infected_NA_NA_chx	FALSE	0.516324	0.0114376
PRJNA940173	SRR23678231	39603146	1364836931	34	492	SRX19541064	GSM7074855	OTHER	other	TRANSCRIPTOMIC	SINGLE	0	0	ILLUMINA	Illumina NovaSeq 6000	SRP425191	PRJNA940173	1		SRS16926835	SAMN33556614	simple	9606	Homo sapiens	GSM7074855	Molecular and Cell Biology, University of California, Berkeley	SRA1597937	3	2023	Makar	K562	K562 CEBPA reporter cell line, nontargeting sgRNA ribo PI, biol rep 1	RFP	1					bone	K562		PI	TRUE		Michal	RFP_NA_1_NA_bone_K562_NA_NA_PI_NA	FALSE	0.516324	0.00872887
PRJDB15060	DRR428601	15396377	769818850	50	343	DRX413776		OTHER	other	TRANSCRIPTOMIC	SINGLE	0	0	ILLUMINA	Illumina HiSeq 2500	DRP009580	PRJDB15060	1		DRS279339	SAMD00571136	simple	9606	Homo sapiens	SAMD00571136	KUMAMOTO	DRA015477	2	2023	Makar		K562 cells expressing shScramble, replicate 2	RFP	2					bone	K562	shScramble		TRUE		Michal	RFP_NA_2_NA_bone_K562_NA_shScramble_NA_NA	FALSE	0.516324	0.00972207
PRJNA317019	SRR3317845					SRX1672234		RNA-Seq	cDNA		SINGLE			ILLUMINA		SRP072710	PRJNA317019	27406171	317019	SRS1369305	SAMN04595289			Homo sapiens	GSM2103082	GEO	SRA401941	7	2016	Tichon	U2OS cells	Ribo-seq following transfection of siRNA 2 against NORAD	RFP	2	KD	chx			bone	U2OS		NORAD	TRUE		HÃ…KON	RFP_NA_2_NA_bone_U2OS_KD_NA_NORAD_chx	FALSE	0.516324	0.0107146
PRJNA275305	SRR1802135					SRX876052		OTHER	other		SINGLE			ILLUMINA		SRP054971	PRJNA275305	26900662	275305	SRS844817	SAMN03342111			Homo sapiens	GSM1608274	GEO	SRA240809	11	2015	Ji	Breast epithelial cell	ERSrcTAM04hr_harr_rep1	RFP	1	KO	harr		4hr	breast	NONE		ER_SrcTAM	TRUE		KORNEL	RFP_NA_1_4hr_breast_NONE_KO_NA_ER_SrcTAM_harr	FALSE	0.516324	0.00854205
PRJNA734003	SRR14693253	57420914	4306568550	75	1280	SRX11031377		OTHER	other	TRANSCRIPTOMIC	SINGLE	0	0	ILLUMINA	HiSeq X Ten	SRP321996	PRJNA734003	1		SRS9102194	SAMN19468237	simple	9606	Homo sapiens	GSM5348510	GEO	SRA1238758	6	2021	Makar	Hepatocellular carcinoma HepG2 cells	HepG2 Knockout_RiboSeq	RFP	1	KO				liver	HepG2			TRUE		auto	RFP_NA_1_NA_liver_HepG2_KO_NA_NA_NA	FALSE	0.516324	0.0161181
PRJNA275386	SRR1803162					SRX876739		OTHER	other		SINGLE			ILLUMINA		SRP055009	PRJNA275386	26297486	275386	SRS845409	SAMN03344025			Homo sapiens	GSM1609393	GEO	SRA241011	2	2015	Cenik	EBV-transformed lymphoblastoid cells	GM18504_Rep3	RFP	3		chx			bone	LCL		GM18504	TRUE		KORNEL	RFP_NA_3_NA_bone_LCL_NA_NA_GM18504_chx	FALSE	0.516324	0.0253707
PRJNA667051	SRR12764797	25072235	795180836	31	338	SRX9235487		OTHER	other	TRANSCRIPTOMIC	SINGLE	0	0	ILLUMINA	NextSeq 500	SRP286182	PRJNA667051	35604092		SRS7468837	SAMN16351590	simple	9606	Homo sapiens	GSM4815968	GEO	SRA1137052	11	2020	Puray-Chavez	Primary human bronchial epithelial cells	Ribo-seq-HBEC-mock-lowMOI	RFP		low								TRUE		auto	RFP_NA_NA_NA_NA_NA_low_NA_NA_NA	FALSE	0.516324	0.008012
PRJNA272597	SRR1758395					SRX842645		RNA-Seq	cDNA		SINGLE			ILLUMINA		SRP052229	PRJNA272597	26729373	272597	SRS818819	SAMN03284296			Homo sapiens	GSM1585227	GEO	SRA231648	1	2016	Xu	Human fibroblast	10_mut l-leucine rep2 RPF	RFP	2	MUT	chx	1		fibroblast	NONE		lLeucine	TRUE		KORNEL	RFP_1_2_NA_fibroblast_NONE_MUT_NA_lLeucine_chx	FALSE	0.516324	0.0999408
PRJNA854905	SRR19918547	12442075	622103750	50	317	SRX15961065	GSM6284785	OTHER	other	TRANSCRIPTOMIC	SINGLE	0	0	ILLUMINA	Illumina HiSeq 2500	SRP384536	PRJNA854905	35891396		SRS13647407	SAMN29472423	simple	9606	Homo sapiens	GSM6284785	Kamini Singh, Molecular Pharmacology, Albert Einstein College of Medicine	SRA1447869	7	2022	Singh	primary hNPC	B1_ribo	RFP	3					throat	NPC		auto_3444	TRUE		auto	RFP_NA_3_NA_throat_NPC_NA_NA_auto_3444_NA	FALSE	0.516324	0.0146208
PRJNA854905	SRR19918532	13095946	654797300	50	332	SRX15961067	GSM6284787	OTHER	other	TRANSCRIPTOMIC	SINGLE	0	0	ILLUMINA	Illumina HiSeq 2500	SRP384536	PRJNA854905	35891396		SRS13647409	SAMN29472421	simple	9606	Homo sapiens	GSM6284787	Kamini Singh, Molecular Pharmacology, Albert Einstein College of Medicine	SRA1447869	7	2022	Singh	primary hNPC	B2_ribo	RFP	6					throat	NPC		auto_3463	TRUE		auto	RFP_NA_6_NA_throat_NPC_NA_NA_auto_3463_NA	FALSE	0.516324	0.0118717
PRJNA257365	SRR1535531					SRX668707		RNA-Seq	cDNA		SINGLE			ILLUMINA		SRP045214	PRJNA257365	25989971	257365	SRS673069	SAMN02950957			Homo sapiens	GSM1464100	GEO	SRA177782	7	2015	Rutkowski	Ribosome profiling	RP 8 h p.i. - Rep 1	RFP	1		chx	1	8h	skin	NONE			TRUE		HÃ…KON	RFP_1_1_8h_skin_NONE_NA_NA_NA_chx	FALSE	0.516324	0.0267626
PRJNA181016	SRR619090					SRX205667		RNA-Seq	size fractionation		SINGLE			ILLUMINA		SRP017263	PRJNA181016	23290916	181016	SRS376441	SAMN01816435			Homo sapiens	HEK293_VER	CORNELL	SRA061778	1	2013	Liu		HEK293_VER	RFP	1	VER	chx			kidney	HEK293			TRUE		HÃ…KON	RFP_NA_1_NA_kidney_HEK293_VER_NA_NA_chx	FALSE	0.516324	0.0111292
PRJNA309995	SRR3129152					SRX1549425		RNA-Seq	cDNA		SINGLE			ILLUMINA		SRP068967	PRJNA309995	27259150	309995	SRS1266214	SAMN04444431			Homo sapiens	GSM2048208	GEO	SRA342069	6	2016	Goodarzi	CN34-LM1a	CN34-LM1a-RPF-rep1	RFP	1	WT	chx			breast	CN34		LM1a	TRUE		HÃ…KON	RFP_NA_1_NA_breast_CN34_WT_NA_LM1a_chx	FALSE	0.516324	0.00941841
PRJNA591214	SRR10513636					SRX7201733	1R	RNA-Seq	PCR		SINGLE			ILLUMINA		SRP231304	PRJNA591214	33014344	591214	SRS5706994	SAMN13354200			Homo sapiens	1R_CAGATC	FOOD AND DRUG ADMINISTRATION	SRA1001027	11	2019	Alexaki		Ribo-Seq WT1	RFP	1	WT	frozen			kidney	HEK293			TRUE		PREETI	RFP_NA_1_NA_kidney_HEK293_WT_NA_NA_frozen	FALSE	0.516324	0.00626931
PRJNA659066	SRR12511461					SRX9002218	JR_SP2_RPI_6_WT.fq.gz	RNA-Seq	RT-PCR		SINGLE			ILLUMINA		SRP278682	PRJNA659066		659066	SRS5028751	SAMN12137828			Homo sapiens	GSM3905623	KI (KAROLINSKA INSTITUTET)	SRA1116651	8	2020	Rorbach	Human Embryonic Kidney_Flp-Inâ„¢ 293 T-REx	C6orf203 KO cells	RFP	2	WT	chx			kidney	HEK293		mitochondrial	TRUE		PREETI	RFP_NA_2_NA_kidney_HEK293_WT_NA_mitochondrial_chx	FALSE	0.516324	0.0163857
PRJNA310015	SRR3129937					SRX1550085		RNA-Seq	cDNA		SINGLE			ILLUMINA		SRP068977	PRJNA310015	27259150	310015	SRS1266870	SAMN04445128			Homo sapiens	GSM2049158	GEO	SRA342122	6	2016	Goodarzi	MDA-parental	MDA-RPF-rep2	RFP	2	WT	chx			breast	MDA		parental	TRUE		HÃ…KON	RFP_NA_2_NA_breast_MDA_WT_NA_parental_chx	FALSE	0.516324	0.0194677
PRJNA379448	SRR5350740					SRX2647162		OTHER	other		SINGLE			ILLUMINA		SRP102020	PRJNA379448	28388414	379448	SRS2052442	SAMN06608456			Homo sapiens	GSM2538884	GEO	SRA546519	6	2017	Slobodin	MCF7	MCF7.C.ribo	RFP		WT	chx			breast	MCF7			TRUE		HÃ…KON	RFP_NA_NA_NA_breast_MCF7_WT_NA_NA_chx	FALSE	0.515661	0.369427
PRJNA262009	SRR1585557					SRX709900		RNA-Seq	cDNA		SINGLE			ILLUMINA		SRP047476	PRJNA262009	25657249	262009	SRS708916	SAMN03079319			Homo sapiens	GSM1513258	GEO	SRA185822	12	2014	Battle	lymphoblastoid cell lines derived fromHapMap Yoruba individual	GM19257	RFP	72		frozen			bone	LCL		cyto	TRUE		HÃ…KON	RFP_NA_72_NA_bone_LCL_NA_NA_cyto_frozen	FALSE	0.514835	0.023208
PRJNA448763	SRR6939932					SRX3884284		OTHER	other		SINGLE			ILLUMINA		SRP137150	PRJNA448763	31281537	448763	SRS3123557	SAMN08864582			Homo sapiens	GSM3081744	GEO	SRA681490	6	2019	Zou	normal_RPF	LC034_normal_RPF	RFP	3		chx			liver	NONE		normal	TRUE		TESHOME	RFP_NA_3_NA_liver_NONE_NA_NA_normal_chx	FALSE	0.513844	0.476453
PRJNA310096	SRR3130944					SRX1550640		RNA-Seq	cDNA		SINGLE			ILLUMINA		SRP069008	PRJNA310096	27259150	310096	SRS1267339	SAMN04446281			Homo sapiens	GSM2049173	GEO	SRA342503	6	2016	Goodarzi	MDA-parental	MDA-Arg-RPF-rep1	RFP	1	Arg	chx			breast	MDA			TRUE		HÃ…KON	RFP_NA_1_NA_breast_MDA_Arg_NA_NA_chx	FALSE	0.509898	0.0752096
PRJNA681523	SRR13165894					SRX9604755		OTHER	other		SINGLE			ILLUMINA		SRP295094	PRJNA681523		681523	SRS7808356	SAMN16955148			Homo sapiens	GSM4949733	GEO	SRA1165019	4	2021	Waldron	Calu 3 cells, ATCC HTB-52	Calu3_fp_5hpi	RFP	1	COV2	chx		5h	lung	Calu3			TRUE		PREETI	RFP_NA_1_5h_lung_Calu3_COV2_NA_NA_chx	FALSE	0.508336	0.08962
PRJNA453915	SRR7073125					SRX4003573		RNA-Seq	cDNA		SINGLE			ILLUMINA		SRP143452	PRJNA453915	30029003	453915	SRS3225375	SAMN08993036			Homo sapiens	GSM3118932	GEO	SRA696853	7	2018	Darnell	HCT116 cells, NCI-60 panel	hct116_arg_3h	RFP			chx		3h	colon	HCT116		arg	TRUE		TESHOME	RFP_NA_NA_3h_colon_HCT116_NA_NA_arg_chx	FALSE	0.508332	0.104813
PRJNA414611	SRR6181547					SRX3292091		OTHER	other		SINGLE			ILLUMINA		SRP120157	PRJNA414611	30591072	414611	SRS2601270	SAMN07795656			Homo sapiens	GSM2817682	GEO	SRA620345	4	2018	Murat	ATCC Cell Lines	RPF-sc-3	RFP	3		chx	1		ovary	HeLa		sc	TRUE		TESHOME	RFP_1_3_NA_ovary_HeLa_NA_NA_sc_chx	FALSE	0.506588	0.0836264
PRJNA256317	SRR1528677					SRX663288		OTHER	other		SINGLE			ILLUMINA		SRP044936	PRJNA256317	28274951	256317	SRS668163	SAMN02943059			Homo sapiens	GSM1446867	GEO	SRA176907	7	2017	Loayza-Puch	U2OS myc batch6 RP	U2OS myc batch6 RP	RFP	1	myc	chx	6		bone	U2OS			TRUE		HÃ…KON	RFP_6_1_NA_bone_U2OS_myc_NA_NA_chx	FALSE	0.506577	0.64504
PRJNA540298	SRR11626656	66419146	3320957300	50	1336	SRX8190760		OTHER	other	TRANSCRIPTOMIC	SINGLE	0	0	ILLUMINA	Illumina HiSeq 2500	SRP194188	PRJNA540298	34244513		SRS6549550	SAMN14755289	simple	9606	Homo sapiens	GSM4504140	GEO	SRA880706	3	2021	Lim	Prostate cancer tissue	Lucap 78 Tumor sample, Ribosome bound RNA, replicate2	RFP	2					prostate				TRUE		auto	RFP_NA_2_NA_prostate_NA_NA_NA_NA_NA	FALSE	0.506024	0.0779977
PRJNA413138	SRR6130308					SRX3242684		RNA-Seq	cDNA		SINGLE			ILLUMINA		SRP119397	PRJNA413138		413138	SRS2565672	SAMN07736632			Homo sapiens	GSM2803855	GEO	SRA616966	10	2020	Rauscher	CFBE cells 48h after transfection with wild-type CFTR	CFBE RPF enriched for CFTR	RFP			chx			lung	CFBE			TRUE		TESHOME	RFP_NA_NA_NA_lung_CFBE_NA_NA_NA_chx	FALSE	0.502897	0.0988569
PRJNA542670	SRR9049066					SRX5825538		OTHER	other		SINGLE			ILLUMINA		SRP198270	PRJNA542670	31284728	542670	SRS4753592	SAMN11635163			Homo sapiens	GSM3763610	GEO	SRA885795	10	2019	Chothani	Left ventricle tissue of end-stage DCM patients	Left ventricle tissue of end-stage DCM patients (20MC01828)	RFP	15		chx			heart	NONE			TRUE		TESHOME	RFP_NA_15_NA_heart_NONE_NA_NA_NA_chx	FALSE	0.50264	0.0305772
PRJNA477831	SRR7883754					SRX4721985		OTHER	other		SINGLE			ILLUMINA		SRP151279	PRJNA477831	30590705	477831	SRS3807072	SAMN10097082			Homo sapiens	GSM3396996	GEO	SRA728057	3	2019	Liu	iPSC	qc_sample_ipsc7_low_rnase	RFP	7	low	chx			embryonic	iPSC			TRUE		TESHOME	RFP_NA_7_NA_embryonic_iPSC_low_NA_NA_chx	FALSE	0.502257	0.0297373
PRJNA275386	SRR1803185					SRX876762		OTHER	other		SINGLE			ILLUMINA		SRP055009	PRJNA275386	26297486	275386	SRS845385	SAMN03343993			Homo sapiens	GSM1609416	GEO	SRA241011	2	2015	Cenik	EBV-transformed lymphoblastoid cells	GM19201_Rep1	RFP	1		chx			bone	LCL		GM19201	TRUE		KORNEL	RFP_NA_1_NA_bone_LCL_NA_NA_GM19201_chx	FALSE	0.500719	0.0262694
PRJNA278390	SRR1916543					SRX957352		RNA-Seq	cDNA		SINGLE			ILLUMINA		SRP056200	PRJNA278390	26538417	278390	SRS874709	SAMN03418224			Homo sapiens	GSM1634444	GEO	SRA246838	11	2015	Elkon	U2OS, Myc activation (36 hr)	Myc.rp.rep1	RFP	1	treated	chx			bone	U2OS		Myc	TRUE		KORNEL	RFP_NA_1_NA_bone_U2OS_treated_NA_Myc_chx	FALSE	0.500205	0.182473
PRJNA587516	SRR10399046					SRX7099268		OTHER	other		SINGLE			ILLUMINA		SRP228560	PRJNA587516	33142117	587516	SRS5611530	SAMN13192266			Homo sapiens	GSM4148622	GEO	SRA991392	11	2020	Banh	Pancreactic Ductal Adenocarcinom	PATU-8902_RPF_woSG1	RFP	1		chx			pancreas	PATU			TRUE		PREETI	RFP_NA_1_NA_pancreas_PATU_NA_NA_NA_chx	FALSE	0.497011	0.0159694
PRJNA275386	SRR1803178					SRX876755		OTHER	other		SINGLE			ILLUMINA		SRP055009	PRJNA275386	26297486	275386	SRS845390	SAMN03344035			Homo sapiens	GSM1609409	GEO	SRA241011	2	2015	Cenik	EBV-transformed lymphoblastoid cells	GM19137_Rep1	RFP	1		chx			bone	LCL		GM19137	TRUE		KORNEL	RFP_NA_1_NA_bone_LCL_NA_NA_GM19137_chx	FALSE	0.496428	0.154584
PRJNA275386	SRR1803174					SRX876751		OTHER	other		SINGLE			ILLUMINA		SRP055009	PRJNA275386	26297486	275386	SRS845395	SAMN03344050			Homo sapiens	GSM1609405	GEO	SRA241011	2	2015	Cenik	EBV-transformed lymphoblastoid cells	GM18951_Rep3	RFP	3		chx			bone	LCL		GM18951	TRUE		KORNEL	RFP_NA_3_NA_bone_LCL_NA_NA_GM18951_chx	FALSE	0.495874	0.266404
PRJNA396698	SRR5886323	88773976	6746822176	76	2306	SRX3052239		OTHER	other	TRANSCRIPTOMIC	SINGLE	0	0	ILLUMINA	NextSeq 500	SRP114504	PRJNA396698	30449621		SRS2398667	SAMN07431142	simple	9606	Homo sapiens	GSM2724039	GEO	SRA595098	11	2018	Arango	HeLa cells, Ribosome Protected RNA	NAT10_KO_Ribo-seq_BioRep_2 (protected RNA)	RFP	2	KO				ovary	HeLa	NAT10_	auto_963	TRUE		auto	RFP_NA_2_NA_ovary_HeLa_KO_NAT10__auto_963_NA	FALSE	0.4954	0.539355
PRJNA756018	SRR15513152	76499364	2702125563	35	1111	SRX11811946		RNA-Seq	cDNA	TRANSCRIPTOMIC	SINGLE	0	0	ILLUMINA	NextSeq 500	SRP333128	PRJNA756018	35841888		SRS9826464	SAMN20849937	simple	9606	Homo sapiens	GSM5527677	GEO	SRA1280330	7	2022	Chothani	untreated normal human brain tissue	Brain_5 (RiboSeq)	RFP	1					brain			auto_2974	TRUE		auto	RFP_NA_1_NA_brain_NA_NA_NA_auto_2974_NA	FALSE	0.492465	0.356716
PRJNA809587	SRR18113903	19986726	2998008900	150	1080	SRX14264283	GSM5911787	OTHER	other	TRANSCRIPTOMIC	SINGLE	0	0	ILLUMINA	Illumina NovaSeq 6000	SRP361145	PRJNA809587	36074823		SRS12083243	SAMN26199036	simple	9606	Homo sapiens	GSM5911787	Wei Xie, School of Life Sciences, Tsinghua University	SRA1376840	10	2022	Zou	Preimplantation embryo	h_2cell_2PN_21_Ribo_rep1	RFP	1									TRUE		auto	RFP_NA_1_NA_NA_NA_NA_NA_NA_NA	FALSE	0.490707	0.0376724
PRJNA756018	SRR15513151	140962476	4985219559	35	2109	SRX11811945		RNA-Seq	cDNA	TRANSCRIPTOMIC	SINGLE	0	0	ILLUMINA	NextSeq 500	SRP333128	PRJNA756018	35841888		SRS9826463	SAMN20849936	simple	9606	Homo sapiens	GSM5527676	GEO	SRA1280330	7	2022	Chothani	untreated normal human brain tissue	Brain_4 (RiboSeq)	RFP	1					brain			auto_2973	TRUE		auto	RFP_NA_1_NA_brain_NA_NA_NA_auto_2973_NA	FALSE	0.490697	0.298518
PRJNA756018	SRR15513159	62564469	2202162454	35	892	SRX11811953		RNA-Seq	cDNA	TRANSCRIPTOMIC	SINGLE	0	0	ILLUMINA	NextSeq 500	SRP333128	PRJNA756018	35841888		SRS9826471	SAMN20849944	simple	9606	Homo sapiens	GSM5527684	GEO	SRA1280330	7	2022	Chothani	untreated normal human fat tissue	Fat_1 (RiboSeq)	RFP	1								auto_2980	TRUE		auto	RFP_NA_1_NA_NA_NA_NA_NA_auto_2980_NA	FALSE	0.489869	0.0316356
PRJNA453915	SRR7073143					SRX4003591		RNA-Seq	cDNA		SINGLE			ILLUMINA		SRP143452	PRJNA453915	30029003	453915	SRS3225393	SAMN08993026			Homo sapiens	GSM3118950	GEO	SRA696853	7	2018	Darnell	HEK293T cells, ATCC CRL-3216 + AAVS1:hrGFP	hrgfp_arg_6h	RFP			chx		6h	kidney	HEK293		hrgfp_arg	TRUE		TESHOME	RFP_NA_NA_6h_kidney_HEK293_NA_NA_hrgfp_arg_chx	FALSE	0.489549	0.120968
PRJNA731473	SRR14602126	137949003	6897450150	50	2227	SRX10947892		OTHER	other	TRANSCRIPTOMIC	SINGLE	0	0	ILLUMINA	Illumina NovaSeq 6000	SRP320668	PRJNA731473	34850942		SRS9026796	SAMN19285888	simple	9606	Homo sapiens	GSM5325967	GEO	SRA1234831	3	2022	Del	Treated HEK293T cells, Riboseq/ILMN	HEK_Hpos_ILMN	RFP	1					kidney	HEK293		auto_2796	TRUE		auto	RFP_NA_1_NA_kidney_HEK293_NA_NA_auto_2796_NA	FALSE	0.488418	0.0618197
PRJNA542670	SRR9049071					SRX5825543		OTHER	other		SINGLE			ILLUMINA		SRP198270	PRJNA542670	31284728	542670	SRS4753597	SAMN11635157			Homo sapiens	GSM3763615	GEO	SRA885795	10	2019	Chothani	Left ventricle tissue of end-stage DCM patients	Left ventricle tissue of end-stage DCM patients (20MS01733)	RFP	20		chx			heart	NONE			TRUE		TESHOME	RFP_NA_20_NA_heart_NONE_NA_NA_NA_chx	FALSE	0.486809	0.0141573
PRJNA285961	SRR2052920					SRX1050337		OTHER	other		SINGLE			ILLUMINA		SRP059187	PRJNA285961	29321322	285961	SRS954638	SAMN03763409			Homo sapiens	GSM1704512	GEO	SRA271639	9	2016	Reid	Huh7 cells	Interferon treatment ER ribosome profiling (Rep 1)	RFP	1	treated	chx			liver	Huh7		ER	TRUE		KORNEL	RFP_NA_1_NA_liver_Huh7_treated_NA_ER_chx	FALSE	0.486737	0.011839
PRJNA729461	SRR14510056	49198915	1158906235	23	509	SRX10855869		OTHER	other	TRANSCRIPTOMIC	SINGLE	0	0	ILLUMINA	Illumina NovaSeq 6000	SRP319472	PRJNA729461	34226921		SRS8951500	SAMN19116420	simple	9606	Homo sapiens	GSM5291900	GEO	SRA1231346	7	2021	Ichihara	HEK293T cells	WT HEK293T arsenite Ribo-seq replicate 1	RFP	1	WT				kidney	HEK293			TRUE		auto	RFP_NA_1_NA_kidney_HEK293_WT_NA_NA_NA	FALSE	0.485325	0.0310452
PRJNA272597	SRR1758397					SRX842647		RNA-Seq	cDNA		SINGLE			ILLUMINA		SRP052229	PRJNA272597	26729373	272597	SRS818821	SAMN03284315			Homo sapiens	GSM1585229	GEO	SRA231648	1	2016	Xu	Human fibroblast	12_mut l-leucine rep2 RPF	RFP	2	MUT	chx	2		fibroblast	NONE		lLeucine	TRUE		KORNEL	RFP_2_2_NA_fibroblast_NONE_MUT_NA_lLeucine_chx	FALSE	0.485247	0.0219642
PRJNA272597	SRR1758381					SRX842631		RNA-Seq	cDNA		SINGLE			ILLUMINA		SRP052229	PRJNA272597	26729373	272597	SRS818805	SAMN03284310			Homo sapiens	GSM1585213	GEO	SRA231648	1	2016	Xu	Human fibroblast	6_corr l-leucine rep1 RPF	RFP	1	CORR	chx			fibroblast	NONE		lLeucine	TRUE		KORNEL	RFP_NA_1_NA_fibroblast_NONE_CORR_NA_lLeucine_chx	FALSE	0.482609	0.420927
PRJNA182756	SRR627625					SRX207950		OTHER	other		SINGLE			ILLUMINA		SRP017378	PRJNA182756	23594524	182756	SRS377851	SAMN01821861			Homo sapiens	GSM1047589	GEO	SRA062117	3	2013	Loayza-Puch	Immortalized primary fibroblasts	S.rp	RFP		WT	chx			skin	BJ		RASG12V	TRUE		HÃ…KON	RFP_NA_NA_NA_skin_BJ_WT_NA_RASG12V_chx	FALSE	0.480865	0.0866351
PRJNA181016	SRR619087					SRX205665		RNA-Seq	size fractionation		SINGLE			ILLUMINA		SRP017263	PRJNA181016	23290916	181016	SRS376439	SAMN01816433			Homo sapiens	HEK293_MG132	CORNELL	SRA061778	7	2015	Liu		HEK293_MG132	RFP		MG	chx			kidney	HEK293			TRUE		HÃ…KON	RFP_NA_NA_NA_kidney_HEK293_MG_NA_NA_chx	FALSE	0.480546	0.0189674
PRJNA720951	SRR14200571	29499039	1148013753	38	477	SRX10567361		OTHER	other	TRANSCRIPTOMIC	SINGLE	0	0	ILLUMINA	Illumina HiSeq 4000	SRP314256	PRJNA720951	34166567		SRS8673638	SAMN18687195	simple	9606	Homo sapiens	GSM5234104	GEO	SRA1217043	4	2021	Sofiadis	Normal lung fibroblasts IMR90	Pro_rep1_rpf	RFP	1					lung				TRUE		auto	RFP_NA_1_NA_lung_NA_NA_NA_NA_NA	FALSE	0.478597	0.0161909
PRJNA317266	SRR5938225	34260531	1713026550	50	1111	SRX3098108		OTHER	other	TRANSCRIPTOMIC	SINGLE	0	0	ILLUMINA	Illumina HiSeq 2000	SRP072804	PRJNA317266	31142587		SRS2434432	SAMN07511566	simple	9606	Homo sapiens	GSM2745775	GEO	SRA403832	4	2019	Singh	P493 cell line	P493_3_plus_HR_RF	RFP	2								auto_843	TRUE		auto	RFP_NA_2_NA_NA_NA_NA_NA_auto_843_NA	FALSE	0.476608	0.0104072
PRJEB33244	ERR3403493					ERX3427244	W2RPF_s	RNA-Seq	size fractionation		SINGLE			ILLUMINA		ERP116020	PRJEB33244		706227	ERS3547462	SAMEA5744175			Homo sapiens	E-MTAB-8100:W2RPF	Earlham Institute	ERA2022066	3	2021	Lezina	non-small cell lung carcinoma	W2RPF	RFP	2	KO_rescue	chx	1		lung	H1299	p53		TRUE		PREETI	RFP_1_2_NA_lung_H1299_KO_rescue_p53_NA_chx	FALSE	0.476094	0.489919
PRJNA589466	SRR10441368					SRX7136114		RNA-Seq	cDNA		SINGLE			ILLUMINA		SRP229759	PRJNA589466	32821933	589466	SRS5645032	SAMN13281627			Homo sapiens	GSM4160136	GEO	SRA995632	8	2020	Patel	miR-122 expressing cells	miR-122 expressing cells rep 1 [Ribo-seq]	RFP	1	OE	chx			kidney	HEK293		mir122	TRUE		PREETI	RFP_NA_1_NA_kidney_HEK293_OE_NA_mir122_chx	FALSE	0.475966	0.537402
PRJNA743042	SRR15014901	33323040	2665843200	80	903	SRX11326833		OTHER	other	TRANSCRIPTOMIC	SINGLE	0	0	ILLUMINA	NextSeq 500	SRP326500	PRJNA743042	35322228		SRS9360259	SAMN19989677	simple	9606	Homo sapiens	GSM5412814	GEO	SRA1253510	7	2021	Wang	Patient fibroblasts (PFB)	Ribo_PFB_Lib3_05G418_rep1	RFP	1								auto_2831	TRUE		auto	RFP_NA_1_NA_NA_NA_NA_NA_auto_2831_NA	FALSE	0.475798	0.126829
PRJEB33244	ERR3403497					ERX3427246	W3RPF_s	RNA-Seq	size fractionation		SINGLE			ILLUMINA		ERP116020	PRJEB33244		706227	ERS3547464	SAMEA5744177			Homo sapiens	E-MTAB-8100:W3RPF	Earlham Institute	ERA2022066	3	2021	Lezina	non-small cell lung carcinoma	W3RPF	RFP	3	KO_rescue	chx	1		lung	H1299	p53		TRUE		PREETI	RFP_1_3_NA_lung_H1299_KO_rescue_p53_NA_chx	FALSE	0.475796	0.188229
PRJNA665035	SRR12693492					SRX9173290		OTHER	other		SINGLE			ILLUMINA		SRP284977	PRJNA665035	32995776	665035	SRS7410868	SAMN16238716			Homo sapiens	GSM4798519	GEO	SRA1129972	10	2020	Rao	HEK293	NSP1-HEK-1_ribo	RFP	1	OE	chx			kidney	HEK293	NSP1		TRUE		PREETI	RFP_NA_1_NA_kidney_HEK293_OE_NSP1_NA_chx	FALSE	0.474983	0.208637
PRJNA542601	SRR9047186					SRX5823723		RNA-Seq	cDNA		SINGLE			ILLUMINA		SRP198221	PRJNA542601	32589965	542601	SRS4751824	SAMN11634333			Homo sapiens	GSM3763003	GEO	SRA885670	6	2020	Lin	MCF10-A cell line	si_ctrl_2_TL	RFP	2	Ctrl	chx			breast	MCF10A		KD	TRUE		TESHOME	RFP_NA_2_NA_breast_MCF10A_Ctrl_NA_KD_chx	FALSE	0.473652	0.250619
PRJEB28810	ERR2812354					ERX2819185	human_liver_ribo_3_s	RNA-Seq	other		SINGLE			ILLUMINA		ERP111066	PRJEB28810		575406	ERS2758376	SAMEA4939593			Homo sapiens	SAMEA4939593	Lausanne Genomic Technologies Facility, Lausanne, Switzerland	ERA1612101	10	2019	Wang		E-MTAB-7247:human_liver_ribo_3	RFP	3		chx			liver	NONE			TRUE		PREETI	RFP_NA_3_NA_liver_NONE_NA_NA_NA_chx	FALSE	0.473068	3.23486
PRJNA665035	SRR12693498					SRX9173296		OTHER	other		SINGLE			ILLUMINA		SRP284977	PRJNA665035	32995776	665035	SRS7410874	SAMN16238710			Homo sapiens	GSM4798525	GEO	SRA1129972	10	2020	Rao	HEK293	WT-HEK-1_ribo	RFP	1	WT	chx			kidney	HEK293			TRUE		PREETI	RFP_NA_1_NA_kidney_HEK293_WT_NA_NA_chx	FALSE	0.472503	0.376329
PRJNA590503	SRR10491340	46228496	3467137200	75	1487	SRX7180458	mito_t2_2	RNA-Seq	MNase	TRANSCRIPTOMIC	SINGLE	0	0	ILLUMINA	Illumina HiSeq 2500	SRP230533	PRJNA590503	1		SRS5687200	SAMN13331088	simple	9606	Homo sapiens	HCT116_SHMT2_2	Princeton University	SRA998619	1	2020	Makar		MitoRiboSeq SHMT2 del 2	RFP	2								auto_2038	TRUE		auto	RFP_NA_2_NA_NA_NA_NA_NA_auto_2038_NA	FALSE	0.470783	0.0911899
PRJNA532643	SRR8891631					SRX5676978		OTHER	other		SINGLE			ILLUMINA		SRP192442	PRJNA532643	32522993	532643	SRS4618355	SAMN11408156			Homo sapiens	GSM3721669	GEO	SRA873611	4	2020	Reich	LN308 cell line	LN308-2h-Thapsigargin-TACAAG (Ribo-Seq)	RFP			chx		2h	brain	LN308		thaps	TRUE		TESHOME	RFP_NA_NA_2h_brain_LN308_NA_NA_thaps_chx	FALSE	0.470095	0.2437
PRJNA591625	SRR10530147					SRX7214148		OTHER	other		SINGLE			ILLUMINA		SRP233222	PRJNA591625	33330931	591625	SRS5716951	SAMN13385768			Homo sapiens	GSM4192123	GEO	SRA1002630	11	2020	Selmi	human embryonic stem cells	H9.WT.2.3_Ribo-seq	RFP	3	WT	chx	2		embryonic	H9		2	TRUE		PREETI	RFP_2_3_NA_embryonic_H9_WT_NA_2_chx	FALSE	0.467928	0.06386
PRJNA182756	SRR627621					SRX207946		OTHER	other		SINGLE			ILLUMINA		SRP017378	PRJNA182756	23594524	182756	SRS377847	SAMN01821857			Homo sapiens	GSM1047585	GEO	SRA062117	3	2013	Loayza-Puch	Immortalized primary fibroblasts	C2.rp	RFP	2	WT	chx			skin	BJ		RASG12V	TRUE		HÃ…KON	RFP_NA_2_NA_skin_BJ_WT_NA_RASG12V_chx	FALSE	0.465922	0.0159162
PRJNA509230	SRR8310203					SRX5124107		OTHER	other		SINGLE			ILLUMINA		SRP173240	PRJNA509230	30707697	509230	SRS4137421	SAMN10574522			Homo sapiens	GSM3507228	GEO	SRA822727	1	2019	O'Connell	Skin fibroblasts	patient rep4 Ribo-seq	RFP	4	patient	chx			skin	fibroblast			TRUE		TESHOME	RFP_NA_4_NA_skin_fibroblast_patient_NA_NA_chx	FALSE	0.464241	0.0159794
PRJNA532643	SRR8891626					SRX5676973		OTHER	other		SINGLE			ILLUMINA		SRP192442	PRJNA532643	32522993	532643	SRS4618349	SAMN11408161			Homo sapiens	GSM3721664	GEO	SRA873611	4	2020	Reich	LN308 cell line	LN308-2h-Tunicamycin-AGGAAT-R2 (Ribo-Seq)	RFP	2		chx		2h	brain	LN308		Tuni	TRUE		TESHOME	RFP_NA_2_2h_brain_LN308_NA_NA_Tuni_chx	FALSE	0.463856	0.369279
PRJNA665035	SRR12693499					SRX9173297		OTHER	other		SINGLE			ILLUMINA		SRP284977	PRJNA665035	32995776	665035	SRS7410875	SAMN16238709			Homo sapiens	GSM4798526	GEO	SRA1129972	10	2020	Rao	HEK293	WT-HEK-2_ribo	RFP	2	WT	chx			kidney	HEK293			TRUE		PREETI	RFP_NA_2_NA_kidney_HEK293_WT_NA_NA_chx	FALSE	0.462917	0.162534
PRJEB28810	ERR2812348					ERX2819179	human_brain_ribo_3_s	RNA-Seq	other		SINGLE			ILLUMINA		ERP111066	PRJEB28810		575406	ERS2758370	SAMEA4939587			Homo sapiens	SAMEA4939587	Lausanne Genomic Technologies Facility, Lausanne, Switzerland	ERA1612101	10	2019	Wang		E-MTAB-7247:human_brain_ribo_3	RFP	3		chx			brain	NONE			TRUE		PREETI	RFP_NA_3_NA_brain_NONE_NA_NA_NA_chx	FALSE	0.461238	0.81241
PRJNA589466	SRR10441365					SRX7136111		RNA-Seq	cDNA		SINGLE			ILLUMINA		SRP229759	PRJNA589466	32821933	589466	SRS5645029	SAMN13281630			Homo sapiens	GSM4160133	GEO	SRA995632	8	2020	Patel	Empty vector control	Empty vector control rep 2 [Ribo-seq]	RFP	2	WT	chx			kidney	HEK293			TRUE		PREETI	RFP_NA_2_NA_kidney_HEK293_WT_NA_NA_chx	FALSE	0.46115	0.81729
PRJNA275386	SRR1803163					SRX876740		OTHER	other		SINGLE			ILLUMINA		SRP055009	PRJNA275386	26297486	275386	SRS845406	SAMN03344038			Homo sapiens	GSM1609394	GEO	SRA241011	2	2015	Cenik	EBV-transformed lymphoblastoid cells	GM18505_Rep1	RFP	1		chx			bone	LCL		GM18505	TRUE		KORNEL	RFP_NA_1_NA_bone_LCL_NA_NA_GM18505_chx	FALSE	0.460626	0.0576464
PRJNA278390	SRR1916551					SRX957360		RNA-Seq	cDNA		SINGLE			ILLUMINA		SRP056200	PRJNA278390	26538417	278390	SRS874702	SAMN03418223			Homo sapiens	GSM1634452	GEO	SRA246838	11	2015	Elkon	U2OS, Myc activation + Torin-1	Myc.Torin.rp.lane2	RFP	1	treated	chx	2		bone	U2OS		Myc_Torin	TRUE		KORNEL	RFP_2_1_NA_bone_U2OS_treated_NA_Myc_Torin_chx	FALSE	0.460626	0.0194703
PRJNA147613	SRR648667					SRX217028		RNA-Seq	other		SINGLE			ILLUMINA		SRP017942	PRJNA147613	23290915	147613	SRS385795	SAMN01886423			Homo sapiens	GSM1063575	GEO	SRA064749	7	2015	Shalgi	293T cells	293T_GFP	RFP			chx			kidney	HEK293		GFP	TRUE		HÃ…KON	RFP_NA_NA_NA_kidney_HEK293_NA_NA_GFP_chx	FALSE	0.460176	0.100437
PRJNA212323	SRR935452					SRX323408		OTHER	other		SINGLE			ILLUMINA		SRP027514	PRJNA212323	24301020	212323	SRS459815	SAMN02252763			Homo sapiens	GSM1187138	GEO	SRA093551	10	2013	Rooijers	Osteosarcoma	Cybrid_control_RP_rep1	RFP	1	WT	chx			bone	cybrid			TRUE		HÃ…KON	RFP_NA_1_NA_bone_cybrid_WT_NA_NA_chx	FALSE	0.4596	0.187476
PRJNA512837	SRR8392707	60450688	3753949314	62	1506	SRX5202418		RNA-Seq	cDNA	TRANSCRIPTOMIC	SINGLE	0	0	ILLUMINA	Illumina HiSeq 2000	SRP175158	PRJNA512837	33257563		SRS4207569	SAMN10689173	simple	9606	Homo sapiens	GSM3537592	GEO	SRA830119	12	2020	Sabath	WI38 cells	Young_HS1_Ribo_Seq	RFP	1								auto_1252	TRUE		auto	RFP_NA_1_NA_NA_NA_NA_NA_auto_1252_NA	FALSE	0.458968	0.0737486
PRJNA256317	SRR1528676					SRX663287		OTHER	other		SINGLE			ILLUMINA		SRP044936	PRJNA256317	28274951	256317	SRS668160	SAMN02943058			Homo sapiens	GSM1446866	GEO	SRA176907	7	2017	Loayza-Puch	U2OS control batch6 RP	U2OS control batch6 RP	RFP	1	WT	chx	6		bone	U2OS			TRUE		HÃ…KON	RFP_6_1_NA_bone_U2OS_WT_NA_NA_chx	FALSE	0.456684	0.473383
PRJNA278390	SRR1916542					SRX957351		RNA-Seq	cDNA		SINGLE			ILLUMINA		SRP056200	PRJNA278390	26538417	278390	SRS874710	SAMN03418218			Homo sapiens	GSM1634443	GEO	SRA246838	11	2015	Elkon	U2OS, control	C.rp.rep1	RFP	1	WT	chx			bone	U2OS			TRUE		KORNEL	RFP_NA_1_NA_bone_U2OS_WT_NA_NA_chx	FALSE	0.456447	0.170288
PRJNA806946	SRR18017747	35225531	1266885373	35	491	SRX14171968	GSM5899110	RNA-Seq	cDNA	TRANSCRIPTOMIC	SINGLE	0	0	ILLUMINA	NextSeq 2000	SRP359785	PRJNA806946	36433934		SRS11995931	SAMN25941492	simple	9606	Homo sapiens	GSM5899110	van Heesch, Princess Maxima Center	SRA1372962	12	2022	Palomar-Siles	epithelial	Ribo-Seq H1299-R213X-1	RFP	1								auto_3311	TRUE		auto	RFP_NA_1_NA_NA_NA_NA_NA_auto_3311_NA	FALSE	0.456148	0.142693
PRJNA542670	SRR9049075					SRX5825547		OTHER	other		SINGLE			ILLUMINA		SRP198270	PRJNA542670	31284728	542670	SRS4753601	SAMN11635153			Homo sapiens	GSM3763619	GEO	SRA885795	10	2019	Chothani	Left ventricle tissue of end-stage DCM patients	Left ventricle tissue of end-stage DCM patients (20RL01528)	RFP	24		chx			heart	NONE			TRUE		TESHOME	RFP_NA_24_NA_heart_NONE_NA_NA_NA_chx	FALSE	0.455176	0.051025
PRJEB33244	ERR3403473					ERX3427234	C3RPF_s	RNA-Seq	size fractionation		SINGLE			ILLUMINA		ERP116020	PRJEB33244		706227	ERS3547452	SAMEA5744165			Homo sapiens	E-MTAB-8100:C3RPF	Earlham Institute	ERA2022066	3	2021	Lezina	non-small cell lung carcinoma	C3RPF	RFP	3	KO	chx	1		lung	H1299	p53		TRUE		PREETI	RFP_1_3_NA_lung_H1299_KO_p53_NA_chx	FALSE	0.454796	0.218571
PRJNA663848	SRR12651190					SRX9132414		OTHER	other		SINGLE			ILLUMINA		SRP282584	PRJNA663848	33556964	663848	SRS7374662	SAMN16179952			Homo sapiens	GSM4787169	GEO	SRA1126237	1	2021	Karasik	whole cell	AK012F: A549 wt, 0.25 Âµg/ml poly I:C, 4.5 h	RFP	1	WT	chx		4.5h	lung	A549		polyIC	TRUE		PREETI	RFP_NA_1_4.5h_lung_A549_WT_NA_polyIC_chx	FALSE	0.453993	0.00619895
PRJNA274997	SRR1795436					SRX870809		RNA-Seq	cDNA		SINGLE			ILLUMINA		SRP053402	PRJNA274997	25719440	274997	SRS841574	SAMN03334844			Homo sapiens	GSM1606112	GEO	SRA237056	2	2015	Sidrauski	HEK293T	ribo_tm_b	RFP	4	treated	chx			kidney	HEK293		tm	TRUE		KORNEL	RFP_NA_4_NA_kidney_HEK293_treated_NA_tm_chx	FALSE	0.453681	0.0512509
GSE208041	SRR20106160	184517112	6498475416	35	2161	SRX16141483	GSM6333421	OTHER	other	TRANSCRIPTOMIC	SINGLE	0	0	ILLUMINA	Illumina NovaSeq 6000	SRP386079	PRJNA858047	36284713		SRS13803508	SAMN29660998	simple	9606	Homo sapiens	GSM6333421	AG Uhlenhaut, Institute for Diabetes and Endocrinology (IDE), Helmholz Zentrum MÃ¼nchen	SRA1453914	10	2022	Ansari	THP-1	THP-1 cells, Riboseq/LPS, 3h, rep4	RFP	4				3h	blood	THP1		LPS	TRUE		Michal	RFP_NA_4_3h_blood_THP1_NA_NA_LPS_NA	FALSE	0.452594	1.30529
PRJNA287136	SRR2064439					SRX1059906		OTHER	other		SINGLE			ILLUMINA		SRP059546	PRJNA287136	26878238	287136	SRS962189	SAMN03776754			Homo sapiens	GSM1712838	GEO	SRA273143	7	2017	Loayza-Puch	SUM159 cell line	SUM159 batch3d leucine starvation 0x 12h RP	RFP	1	starvation	chx	3	12h	breast	SUM159			TRUE		KORNEL	RFP_3_1_12h_breast_SUM159_starvation_NA_NA_chx	FALSE	0.452519	0.544758
PRJNA448763	SRR6939959					SRX3884310		OTHER	other		SINGLE			ILLUMINA		SRP137150	PRJNA448763	31281537	448763	SRS3123581	SAMN08864554			Homo sapiens	GSM3081770	GEO	SRA681490	6	2019	Zou	tumor_RPF	LC508_tumor_RPF	RFP	9		chx			liver	NONE		tumor	TRUE		TESHOME	RFP_NA_9_NA_liver_NONE_NA_NA_tumor_chx	FALSE	0.452265	0.129251
PRJEB33244	ERR3403478					ERX3427236	M1RPF_s	RNA-Seq	size fractionation		SINGLE			ILLUMINA		ERP116020	PRJEB33244		706227	ERS3547454	SAMEA5744167			Homo sapiens	E-MTAB-8100:M1RPF	Earlham Institute	ERA2022066	3	2021	Lezina	non-small cell lung carcinoma	M1RPF	RFP	1	KO_mutant	chx	2		lung	H1299	p53		TRUE		PREETI	RFP_2_1_NA_lung_H1299_KO_mutant_p53_NA_chx	FALSE	0.451907	0.20998
PRJNA415033	SRR6191037	142175468	4096230740	28	4084	SRX3301064		OTHER	other	TRANSCRIPTOMIC	SINGLE	0	0	ILLUMINA	Illumina HiSeq 3000	SRP120504	PRJNA415033	31160600		SRS2612413	SAMN07814396	simple	9606	Homo sapiens	GSM2824214	GEO	SRA621248	7	2019	Sauer	HEK293 cells	Wildtype Riboseq 1	RFP	1					kidney	HEK293			TRUE		auto	RFP_NA_1_NA_kidney_HEK293_NA_NA_NA_NA	FALSE	0.451452	0.200496
PRJNA707431	SRR13884537	48881773	1512411107	30	709	SRX10264806		OTHER	other	TRANSCRIPTOMIC	SINGLE	0	0	ILLUMINA	Illumina NovaSeq 6000	SRP309704	PRJNA707431	35137207		SRS8398434	SAMN18205326	simple	9606	Homo sapiens	GSM5140260	GEO	SRA1203922	7	2021	Luan	Cell line:A549	siL23A.Riboseq	RFP	1					lung	A549		auto_2607	TRUE		auto	RFP_NA_1_NA_lung_A549_NA_NA_auto_2607_NA	FALSE	0.451444	0.0246808
PRJEB28810	ERR2812358					ERX2819189	human_testis_ribo_1_s	RNA-Seq	other		SINGLE			ILLUMINA		ERP111066	PRJEB28810		575406	ERS2758380	SAMEA4939597			Homo sapiens	SAMEA4939597	Lausanne Genomic Technologies Facility, Lausanne, Switzerland	ERA1612101	10	2019	Wang		E-MTAB-7247:human_testis_ribo_1	RFP	1		chx			testis	NONE			TRUE		PREETI	RFP_NA_1_NA_testis_NONE_NA_NA_NA_chx	FALSE	0.450287	0.112473
PRJNA540298	SRR11626668	47608731	2380436550	50	865	SRX8190772		OTHER	other	TRANSCRIPTOMIC	SINGLE	0	0	ILLUMINA	Illumina HiSeq 2500	SRP194188	PRJNA540298	34244513		SRS6549562	SAMN14755272	simple	9606	Homo sapiens	GSM4504152	GEO	SRA880706	3	2021	Lim	Prostate cancer tissue	Lucap 145 Tumor sample, Ribosome bound RNA, replicate2	RFP	2					prostate			auto_1360	TRUE		auto	RFP_NA_2_NA_prostate_NA_NA_NA_auto_1360_NA	FALSE	0.449401	0.165796
PRJNA528026	SRR8752387					SRX5543313		RNA-Seq	cDNA		SINGLE			ILLUMINA		SRP188848	PRJNA528026	32040547	528026	SRS4508983	SAMN11166403			Homo sapiens	GSM3679626	GEO	SRA862154	2	2020	Haneke	RPEI cells	FP_RO_2	RFP	2		chx			eye	RPEI		Ro3306	TRUE		TESHOME	RFP_NA_2_NA_eye_RPEI_NA_NA_Ro3306_chx	FALSE	0.447535	0.0651401
PRJNA599943	SRR10850870					SRX7521413		RNA-Seq	cDNA		SINGLE			ILLUMINA		SRP240357	PRJNA599943	32807779	599943	SRS5961020	SAMN13762545			Homo sapiens	GSM4256664	GEO	SRA1022253	6	2020	Karousis	ABCE1 KD 03 - riboseq	AK3_M (L6)	RFP	3	KD	frozen			ovary	HeLa		L6	TRUE		PREETI	RFP_NA_3_NA_ovary_HeLa_KD_NA_L6_frozen	FALSE	0.447447	0.0929269
PRJNA453915	SRR7073144					SRX4003592		RNA-Seq	cDNA		SINGLE			ILLUMINA		SRP143452	PRJNA453915	30029003	453915	SRS3225394	SAMN08993025			Homo sapiens	GSM3118951	GEO	SRA696853	7	2018	Darnell	HEK293T cells, ATCC CRL-3216 + AAVS1:hrGFP	hrgfp_leu_6h	RFP			chx		6h	kidney	HEK293		hrgfp_leu	TRUE		TESHOME	RFP_NA_NA_6h_kidney_HEK293_NA_NA_hrgfp_leu_chx	FALSE	0.447394	0.153105
PRJNA599943	SRR10850869					SRX7521412		RNA-Seq	cDNA		SINGLE			ILLUMINA		SRP240357	PRJNA599943	32807779	599943	SRS5961021	SAMN13762547			Homo sapiens	GSM4256663	GEO	SRA1022253	6	2020	Karousis	ABCE1 KD 02 - riboseq	AK2_M (L6)	RFP	2	KD	frozen			ovary	HeLa		L6	TRUE		PREETI	RFP_NA_2_NA_ovary_HeLa_KD_NA_L6_frozen	FALSE	0.447151	0.0477132
PRJNA152347	SRR403893					SRX118296	GSM869047: Footprint for PP242 treated PC3 cells, replicate #2.	RNA-Seq	cDNA		SINGLE			ILLUMINA		SRP010679	PRJNA152347	22367541	152347	SRS290865	SAMN00779928			Homo sapiens	GSM869047	GEO	SRA049772	2	2012	Hsieh	PC3 human prostate cancer cells	Footprint for PP242 treated PC3 cells, replicate #2.	RFP	2	PP242	chx			prostate	PC3			TRUE		HÃ…KON	RFP_NA_2_NA_prostate_PC3_PP242_NA_NA_chx	FALSE	0.446945	0.0188782
PRJNA275386	SRR1803187					SRX876764		OTHER	other		SINGLE			ILLUMINA		SRP055009	PRJNA275386	26297486	275386	SRS845384	SAMN03344009			Homo sapiens	GSM1609418	GEO	SRA241011	2	2015	Cenik	EBV-transformed lymphoblastoid cells	GM19238_Rep3	RFP	3		chx			bone	LCL		GM19238	TRUE		KORNEL	RFP_NA_3_NA_bone_LCL_NA_NA_GM19238_chx	FALSE	0.445235	0.00912034
PRJNA499096	SRR8130839					SRX4951952	RPF_9	OTHER	other		SINGLE			ILLUMINA		SRP167154	PRJNA499096	32699630	499096	SRS3993628	SAMN10343283			Homo sapiens	MKL1 N200	INSTITUT PASTEUR DE MONTEVIDEO	SRA800308	11	2019	Fernandez-Calero	MKL1		RFP	9	MKL1	chx			breast	MCF7			TRUE		TESHOME	RFP_NA_9_NA_breast_MCF7_MKL1_NA_NA_chx	FALSE	0.444637	0.0161884
PRJNA285961	SRR2052934					SRX1050351		OTHER	other		SINGLE			ILLUMINA		SRP059187	PRJNA285961	29321322	285961	SRS954624	SAMN03763425			Homo sapiens	GSM1704526	GEO	SRA271639	9	2016	Reid	Huh7 cells	Uninfected ER ribosome profiling (Rep 2)	RFP	2	WT	chx			liver	Huh7		ER	TRUE		KORNEL	RFP_NA_2_NA_liver_Huh7_WT_NA_ER_chx	FALSE	0.444637	0.0224883
PRJNA521751	SRR8558082					SRX5359742		OTHER	other		SINGLE			ILLUMINA		SRP185496	PRJNA521751	31619139	521751	SRS4350376	SAMN10910517			Homo sapiens	GSM3597564	GEO	SRA848188	10	2019	Aliouat	colon cancer cell line	RIBOSEQ-eRF3-KO-1	RFP	1	KO	chx			colon	HTC116		eRF3	TRUE		TESHOME	RFP_NA_1_NA_colon_HTC116_KO_NA_eRF3_chx	FALSE	0.44374	0.317722
PRJNA532643	SRR8891630					SRX5676977		OTHER	other		SINGLE			ILLUMINA		SRP192442	PRJNA532643	32522993	532643	SRS4618354	SAMN11408157			Homo sapiens	GSM3721668	GEO	SRA873611	4	2020	Reich	LN308 cell line	LN308-6h-Tunicamycin-GAATGA-R3 (Ribo-Seq)	RFP	3		chx		6h	brain	LN308		Tuni	TRUE		TESHOME	RFP_NA_3_6h_brain_LN308_NA_NA_Tuni_chx	FALSE	0.443051	0.20621
PRJNA303958	SRR2954800	6614307	209723160	31	103	SRX1447296		OTHER	other	TRANSCRIPTOMIC	SINGLE	0	0	ILLUMINA	Illumina HiSeq 2500	SRP066598	PRJNA303958	27232982		SRS1175215	SAMN04288465	simple	9606	Homo sapiens	GSM1948925	GEO	SRA313218	12	2015	Raj	HapMap Lymphoblastoid Cell Line	GM19204 ribosome protected fragments	RFP	1									TRUE		auto	RFP_NA_1_NA_NA_NA_NA_NA_NA_NA	FALSE	0.440517	0.00442523
PRJNA453915	SRR7073154					SRX4003602		RNA-Seq	cDNA		SINGLE			ILLUMINA		SRP143452	PRJNA453915	30029003	453915	SRS3225404	SAMN08993015			Homo sapiens	GSM3118961	GEO	SRA696853	7	2018	Darnell	HEK293T cells, ATCC CRL-3216	293t_rich_6h	RFP			chx		6h	kidney	HEK293		rich	TRUE		TESHOME	RFP_NA_NA_6h_kidney_HEK293_NA_NA_rich_chx	FALSE	0.437968	0.0598415
PRJNA541324	SRR9019688	17339802	1213786140	70	465	SRX5797784		RNA-Seq	cDNA	TRANSCRIPTOMIC	SINGLE	0	0	ILLUMINA	NextSeq 500	SRP195632	PRJNA541324	31944153		SRS4728928	SAMN11583000	simple	9606	Homo sapiens	GSM3753506	GEO	SRA883373	1	2020	Lyabin	Human embryonic kidney	Ribo-Seq wt+HA (RP_wt_HA), run 1	RFP	1					kidney				TRUE		auto	RFP_NA_1_NA_kidney_NA_NA_NA_NA_NA	FALSE	0.437631	0.119879
PRJNA818335	SRR18402610	151536796	7576839800	50	2163	SRX14536493	GSM5964226	OTHER	other	TRANSCRIPTOMIC	SINGLE	0	0	ILLUMINA	Illumina NovaSeq 6000	SRP365126	PRJNA818335	36653366		SRS12333591	SAMN26855357	simple	9606	Homo sapiens	GSM5964226	Adrian Whitehouse, Faculty of Biological Sciences, University of Leeds	SRA1390089	12	2022	Murphy	TREx BCBL1-Rta	Repeat 1: Scrambled shRNA - ribosome footprint RNA	RFP	1									TRUE		auto	RFP_NA_1_NA_NA_NA_NA_NA_NA_NA	FALSE	0.436512	0.0467857
PRJNA310015	SRR3129936					SRX1550084		RNA-Seq	cDNA		SINGLE			ILLUMINA		SRP068977	PRJNA310015	27259150	310015	SRS1266871	SAMN04445127			Homo sapiens	GSM2049157	GEO	SRA342122	6	2016	Goodarzi	MDA-parental	MDA-RPF-rep1	RFP	1	WT	chx			breast	MDA		parental	TRUE		HÃ…KON	RFP_NA_1_NA_breast_MDA_WT_NA_parental_chx	FALSE	0.436405	0.0694697
PRJEB28810	ERR2812353					ERX2819184	human_liver_ribo_2_s	RNA-Seq	other		SINGLE			ILLUMINA		ERP111066	PRJEB28810		575406	ERS2758375	SAMEA4939592			Homo sapiens	SAMEA4939592	Lausanne Genomic Technologies Facility, Lausanne, Switzerland	ERA1612101	10	2019	Wang		E-MTAB-7247:human_liver_ribo_2	RFP	2		chx			liver	NONE			TRUE		PREETI	RFP_NA_2_NA_liver_NONE_NA_NA_NA_chx	FALSE	0.436137	1.85049
PRJNA599422	SRR10846534					SRX7517157		OTHER	other		SINGLE			ILLUMINA		SRP239882	PRJNA599422		599422	SRS5956823	SAMN13750411			Homo sapiens	GSM4255699	GEO	SRA1021798	8	2020	Ouspenskaia	HCT116	HCT116_CHX-	RFP			chx			colon	HCT116		m	TRUE		PREETI	RFP_NA_NA_NA_colon_HCT116_NA_NA_m_chx	FALSE	0.43544	0.52195
PRJNA272597	SRR1758380					SRX842630		RNA-Seq	cDNA		SINGLE			ILLUMINA		SRP052229	PRJNA272597	26729373	272597	SRS818804	SAMN03284299			Homo sapiens	GSM1585212	GEO	SRA231648	1	2016	Xu	Human fibroblast	5_corr d-leucine rep1 RPF	RFP	1	CORR	chx		5h	fibroblast	NONE		dLeucine	TRUE		KORNEL	RFP_NA_1_5h_fibroblast_NONE_CORR_NA_dLeucine_chx	FALSE	0.434851	0.613243
PRJNA396698	SRR5886322	89926731	6834431556	76	2437	SRX3052239		OTHER	other	TRANSCRIPTOMIC	SINGLE	0	0	ILLUMINA	NextSeq 500	SRP114504	PRJNA396698	30449621		SRS2398667	SAMN07431142	simple	9606	Homo sapiens	GSM2724039	GEO	SRA595098	11	2018	Arango	HeLa cells, Ribosome Protected RNA	NAT10_KO_Ribo-seq_BioRep_2 (protected RNA)	RFP	1	KO				ovary	HeLa	NAT10_	auto_962	TRUE		auto	RFP_NA_1_NA_ovary_HeLa_KO_NAT10__auto_962_NA	FALSE	0.433499	0.627132
PRJNA665035	SRR12693500					SRX9173298		OTHER	other		SINGLE			ILLUMINA		SRP284977	PRJNA665035	32995776	665035	SRS7410876	SAMN16238708			Homo sapiens	GSM4798527	GEO	SRA1129972	10	2020	Rao	HEK293	WT-HEK-3_ribo	RFP	3	WT	chx			kidney	HEK293			TRUE		PREETI	RFP_NA_3_NA_kidney_HEK293_WT_NA_NA_chx	FALSE	0.43341	0.125376
PRJEB28810	ERR2812352					ERX2819183	human_liver_ribo_1_s	RNA-Seq	other		SINGLE			ILLUMINA		ERP111066	PRJEB28810		575406	ERS2758374	SAMEA4939591			Homo sapiens	SAMEA4939591	Lausanne Genomic Technologies Facility, Lausanne, Switzerland	ERA1612101	10	2019	Wang		E-MTAB-7247:human_liver_ribo_1	RFP	1		chx			liver	NONE			TRUE		PREETI	RFP_NA_1_NA_liver_NONE_NA_NA_NA_chx	FALSE	0.433151	0.911811
PRJNA542670	SRR9049068					SRX5825540		OTHER	other		SINGLE			ILLUMINA		SRP198270	PRJNA542670	31284728	542670	SRS4753593	SAMN11635160			Homo sapiens	GSM3763612	GEO	SRA885795	10	2019	Chothani	Left ventricle tissue of end-stage DCM patients	Left ventricle tissue of end-stage DCM patients (20MH01845)	RFP	17		chx			heart	NONE			TRUE		TESHOME	RFP_NA_17_NA_heart_NONE_NA_NA_NA_chx	FALSE	0.43306	0.0129666
PRJNA509149	SRR8309250					SRX5123180		OTHER	other		SINGLE			ILLUMINA		SRP173217	PRJNA509149	30626644	509149	SRS4136495	SAMN10564050			Homo sapiens	GSM3506282	GEO	SRA822679	12	2018	Walczak	Membrane fraction from UFSP2-KO HEK293 cells	ufsp2_memb_b	RFP	2	ufsp2	chx			kidney	HEK293		memb	TRUE		TESHOME	RFP_NA_2_NA_kidney_HEK293_ufsp2_NA_memb_chx	FALSE	0.43292	0.0246769
PRJNA576651	SRR10251305					SRX6969311		RNA-Seq	cDNA		SINGLE			ILLUMINA		SRP224954	PRJNA576651	31971508	576651	SRS5494877	SAMN13000238			Homo sapiens	GSM4114799	GEO	SRA975936	1	2020	Wangen	G418 500 ug/mL ribosome profiling A	RPF_25_G418rep2_3_G418_A	RFP	2		chx	3		kidney	HEK293		G418	TRUE		PREETI	RFP_3_2_NA_kidney_HEK293_NA_NA_G418_chx	FALSE	0.432794	0.10519
PRJNA854905	SRR19918490	13433989	671699450	50	331	SRX15961072	GSM6284788	OTHER	other	TRANSCRIPTOMIC	SINGLE	0	0	ILLUMINA	Illumina HiSeq 2500	SRP384536	PRJNA854905	35891396		SRS13647414	SAMN29472420	simple	9606	Homo sapiens	GSM6284788	Kamini Singh, Molecular Pharmacology, Albert Einstein College of Medicine	SRA1447869	7	2022	Singh	primary hNPC	A3_ribo	RFP	4					throat	NPC		auto_3477	TRUE		auto	RFP_NA_4_NA_throat_NPC_NA_NA_auto_3477_NA	FALSE	0.432686	0.0297546
PRJNA284399	SRR2033090					SRX1033333		OTHER	other		SINGLE			ILLUMINA		SRP058501	PRJNA284399	28578850	284399	SRS940877	SAMN03701904			Homo sapiens	GSM1691204	GEO	SRA268955	5	2017	Liu	MM1.S cells	12h ribosome footprint data	RFP		treated	chx		12hr	blood	MM1		bortezomib	TRUE		KORNEL	RFP_NA_NA_12hr_blood_MM1_treated_NA_bortezomib_chx	FALSE	0.432624	0.0283296
PRJNA807729	SRR18054549	161870989	8255420439	51	3269	SRX14206582	GSM5904808	OTHER	other	TRANSCRIPTOMIC	SINGLE	0	0	ILLUMINA	NextSeq 500	SRP360229	PRJNA807729	36856111		SRS12028677	SAMN26000269	simple	9606	Homo sapiens	GSM5904808	Bioinformatics & Comp Biology, UT MD Anderson Cancer Center	SRA1374251	3	2023	Zheng	Breast invasive carcinoma	MCF7 RPF R1	RFP	1					breast	MCF7			TRUE		HÃ¥kon	RFP_NA_1_NA_breast_MCF7_NA_NA_NA_NA	FALSE	0.431385	1.39665
PRJNA806946	SRR18017753	27312241	979282851	35	387	SRX14171962	GSM5899104	RNA-Seq	cDNA	TRANSCRIPTOMIC	SINGLE	0	0	ILLUMINA	NextSeq 2000	SRP359785	PRJNA806946	36433934		SRS11995925	SAMN25941498	simple	9606	Homo sapiens	GSM5899104	van Heesch, Princess Maxima Center	SRA1372962	12	2022	Palomar-Siles	epithelial	Ribo-Seq H1299-EVG418-4	RFP	1								auto_3305	TRUE		auto	RFP_NA_1_NA_NA_NA_NA_NA_auto_3305_NA	FALSE	0.431106	0.168395
PRJNA453915	SRR7073150					SRX4003598		RNA-Seq	cDNA		SINGLE			ILLUMINA		SRP143452	PRJNA453915	30029003	453915	SRS3225400	SAMN08993019			Homo sapiens	GSM3118957	GEO	SRA696853	7	2018	Darnell	HEK293T cells, ATCC CRL-3216, GCN2 KO	gcn2ko_leu_6h	RFP			chx		6h	kidney	HEK293		gcn2ko_leu	TRUE		TESHOME	RFP_NA_NA_6h_kidney_HEK293_NA_NA_gcn2ko_leu_chx	FALSE	0.430836	0.0770293
PRJNA542601	SRR9047187					SRX5823724		RNA-Seq	cDNA		SINGLE			ILLUMINA		SRP198221	PRJNA542601	32589965	542601	SRS4751825	SAMN11634332			Homo sapiens	GSM3763004	GEO	SRA885670	6	2020	Lin	MCF10-A cell line	si_ctrl_3_TL	RFP	3	Ctrl	chx			breast	MCF10A		KD	TRUE		TESHOME	RFP_NA_3_NA_breast_MCF10A_Ctrl_NA_KD_chx	FALSE	0.429883	0.200138
PRJNA292020	SRR2146893					SRX1134554		OTHER	other		SINGLE			ILLUMINA		SRP062074	PRJNA292020	26595770	292020	SRS1024438	SAMN03959896			Homo sapiens	GSM1844759	GEO	SRA282320	11	2015	Siprashvili	CHL-1 melanoma cells	10mM AZC + MG132	RFP		KD	chx			skin	CHL1		10mM AZC	TRUE		KORNEL	RFP_NA_NA_NA_skin_CHL1_KD_NA_10mM AZC_chx	FALSE	0.42977	0.0934526
PRJNA532643	SRR8891625					SRX5676972		OTHER	other		SINGLE			ILLUMINA		SRP192442	PRJNA532643	32522993	532643	SRS4618350	SAMN11408162			Homo sapiens	GSM3721663	GEO	SRA873611	4	2020	Reich	LN308 cell line	LN308-2h-Tunicamycin-AGGAAT-R1 (Ribo-Seq)	RFP	1		chx		2h	brain	LN308		Tuni	TRUE		TESHOME	RFP_NA_1_2h_brain_LN308_NA_NA_Tuni_chx	FALSE	0.429229	0.206291
PRJNA807729	SRR18054547	176680836	9010722636	51	2767	SRX14206584	GSM5904810	OTHER	other	TRANSCRIPTOMIC	SINGLE	0	0	ILLUMINA	NextSeq 500	SRP360229	PRJNA807729	36856111		SRS12028679	SAMN26000267	simple	9606	Homo sapiens	GSM5904810	Bioinformatics & Comp Biology, UT MD Anderson Cancer Center	SRA1374251	3	2023	Zheng	Breast invasive carcinoma	MCF7 RPF R3	RFP	3					breast	MCF7			TRUE		HÃ¥kon	RFP_NA_3_NA_breast_MCF7_NA_NA_NA_NA	FALSE	0.428691	2.01433
PRJNA285961	SRR2052912					SRX1050329		OTHER	other		SINGLE			ILLUMINA		SRP059187	PRJNA285961	29321322	285961	SRS954645	SAMN03763401			Homo sapiens	GSM1704504	GEO	SRA271639	9	2016	Reid	Huh7 cells	6 h infection ER ribosome profiling (Rep 1)	RFP	1	infected	chx		6hr	liver	Huh7		ER	TRUE		KORNEL	RFP_NA_1_6hr_liver_Huh7_infected_NA_ER_chx	FALSE	0.428469	0.0398284
PRJNA521751	SRR8558085					SRX5359745		OTHER	other		SINGLE			ILLUMINA		SRP185496	PRJNA521751	31619139	521751	SRS4350379	SAMN10910526			Homo sapiens	GSM3597567	GEO	SRA848188	10	2019	Aliouat	colon cancer cell line	RIBOSEQ-Upf1-KO-2	RFP	2	KO	chx			colon	HTC116		Upf1	TRUE		TESHOME	RFP_NA_2_NA_colon_HTC116_KO_NA_Upf1_chx	FALSE	0.42774	0.42001
PRJNA822939	SRR18592268	23607566	2006643110	85	674	SRX14720939	GSM6008628	OTHER	other	TRANSCRIPTOMIC	SINGLE	0	0	ILLUMINA	NextSeq 500	SRP367409	PRJNA822939	35858571		SRS12483100	SAMN27283805	simple	9606	Homo sapiens	GSM6008628	Department of Genetics and Genome Sciences, Case Western Reserve University	SRA1400321	4	2022	Krokowski	Corneal epithelial cells	6h 500 mOsm + Torin1 rep1 Ribosome profiling	RFP	1	high								TRUE		auto	RFP_NA_1_NA_NA_NA_high_NA_NA_NA	FALSE	0.427672	0.0799329
PRJNA256317	SRR1528682					SRX663292		OTHER	other		SINGLE			ILLUMINA		SRP044936	PRJNA256317	28274951	256317	SRS668165	SAMN02943063			Homo sapiens	GSM1446871	GEO	SRA176907	7	2017	Loayza-Puch	U2OS myc batch7 RP	U2OS myc batch7 RP	RFP	1	myc	chx	7		bone	U2OS			TRUE		HÃ…KON	RFP_7_1_NA_bone_U2OS_myc_NA_NA_chx	FALSE	0.427672	0.15008
PRJNA278390	SRR1916546					SRX957355		RNA-Seq	cDNA		SINGLE			ILLUMINA		SRP056200	PRJNA278390	26538417	278390	SRS874707	SAMN03418221			Homo sapiens	GSM1634447	GEO	SRA246838	11	2015	Elkon	U2OS, Myc activation (36 hr)	Myc.rp.rep2.lane1	RFP	2	treated	chx	1		bone	U2OS		Myc	TRUE		KORNEL	RFP_1_2_NA_bone_U2OS_treated_NA_Myc_chx	FALSE	0.427672	0.0393817
PRJNA807729	SRR18054548	190609615	9721090365	51	2992	SRX14206583	GSM5904809	OTHER	other	TRANSCRIPTOMIC	SINGLE	0	0	ILLUMINA	NextSeq 500	SRP360229	PRJNA807729	36856111		SRS12028678	SAMN26000268	simple	9606	Homo sapiens	GSM5904809	Bioinformatics & Comp Biology, UT MD Anderson Cancer Center	SRA1374251	3	2023	Zheng	Breast invasive carcinoma	MCF7 RPF R2	RFP	2					breast	MCF7			TRUE		HÃ¥kon	RFP_NA_2_NA_breast_MCF7_NA_NA_NA_NA	FALSE	0.427202	1.50467
PRJNA275386	SRR1803173					SRX876750		OTHER	other		SINGLE			ILLUMINA		SRP055009	PRJNA275386	26297486	275386	SRS845397	SAMN03344040			Homo sapiens	GSM1609404	GEO	SRA241011	2	2015	Cenik	EBV-transformed lymphoblastoid cells	GM18951_Rep2	RFP	2		chx			bone	LCL		GM18951	TRUE		KORNEL	RFP_NA_2_NA_bone_LCL_NA_NA_GM18951_chx	FALSE	0.426963	0.0676894
PRJNA528026	SRR8752389					SRX5543315		RNA-Seq	cDNA		SINGLE			ILLUMINA		SRP188848	PRJNA528026	32040547	528026	SRS4508985	SAMN11166400			Homo sapiens	GSM3679628	GEO	SRA862154	2	2020	Haneke	RPEI cells	FP_RO_3	RFP	3		chx			eye	RPEI		Ro3306	TRUE		TESHOME	RFP_NA_3_NA_eye_RPEI_NA_NA_Ro3306_chx	FALSE	0.426163	0.0586981
PRJNA272597	SRR1758378					SRX842628		RNA-Seq	cDNA		SINGLE			ILLUMINA		SRP052229	PRJNA272597	26729373	272597	SRS818802	SAMN03284312			Homo sapiens	GSM1585210	GEO	SRA231648	1	2016	Xu	Human fibroblast	1_wt d-leucine rep1 RPF	RFP	1	WT	chx			fibroblast	NONE		dLeucine	TRUE		KORNEL	RFP_NA_1_NA_fibroblast_NONE_WT_NA_dLeucine_chx	FALSE	0.425919	0.233276
PRJNA472636	SRR7207279					SRX4116264		OTHER	other		SINGLE			ILLUMINA		SRP148767	PRJNA472636	30089253	472636	SRS3331552	SAMN09238862			Homo sapiens	GSM3150291	GEO	SRA709715	7	2018	Gameiro	Breast epithelial cell	EtOH_NoG_04hr.3	RFP	3	NoG	chx		4h	breast	MCF10A		EtOH	TRUE		TESHOME	RFP_NA_3_4h_breast_MCF10A_NoG_NA_EtOH_chx	FALSE	0.425772	0.150039
PRJNA272597	SRR1758379					SRX842629		RNA-Seq	cDNA		SINGLE			ILLUMINA		SRP052229	PRJNA272597	26729373	272597	SRS818803	SAMN03284297			Homo sapiens	GSM1585211	GEO	SRA231648	1	2016	Xu	Human fibroblast	2_wt l-leucine rep1 RPF	RFP	1	WT	chx			fibroblast	NONE		lLeucine	TRUE		KORNEL	RFP_NA_1_NA_fibroblast_NONE_WT_NA_lLeucine_chx	FALSE	0.425408	0.166594
PRJNA129385	SRR057529					SRX021974	GSM546928: Footprint_miR-155_12hr_run1	RNA-Seq	cDNA		SINGLE			ILLUMINA		SRP002605	PRJNA129385	20703300	129385	SRS079393	SAMN00014838			Homo sapiens	GSM546928	GEO	SRA020150	8	2010	Guo	HeLa	Footprint_miR-155_12hr_run1	RFP	1	mir155	chx		12h	ovary	HeLa			TRUE		HÃ…KON	RFP_NA_1_12h_ovary_HeLa_mir155_NA_NA_chx	FALSE	0.424834	0.368582
PRJNA263582	SRR1610245					SRX730866		OTHER	other		SINGLE			ILLUMINA		SRP048825	PRJNA263582	26399832	263582	SRS720043	SAMN03104419			Homo sapiens	GSM1523625	GEO	SRA189363	9	2015	Werner	hES cell, treated with sh control, ND 1d	ribo_ND1_shControl_replicate1	RFP	1	WT	chx	1	1d	embryonic	H1			TRUE		KORNEL	RFP_1_1_1d_embryonic_H1_WT_NA_NA_chx	FALSE	0.424732	0.0787081
PRJNA272597	SRR1758411					SRX842661		RNA-Seq	cDNA		SINGLE			ILLUMINA		SRP052229	PRJNA272597	26729373	272597	SRS818835	SAMN03284278			Homo sapiens	GSM1585243	GEO	SRA231648	1	2016	Xu	Human fibroblast	10_mut l-leucine rep3 RPF	RFP	3	MUT	chx	1		fibroblast	NONE		lLeucine	TRUE		KORNEL	RFP_1_3_NA_fibroblast_NONE_MUT_NA_lLeucine_chx	FALSE	0.42464	0.228083
PRJNA532643	SRR8891628					SRX5676975		OTHER	other		SINGLE			ILLUMINA		SRP192442	PRJNA532643	32522993	532643	SRS4618353	SAMN11408159			Homo sapiens	GSM3721666	GEO	SRA873611	4	2020	Reich	LN308 cell line	LN308-6h-Tunicamycin-GAATGA-R1 (Ribo-Seq)	RFP	1		chx		6h	brain	LN308		Tuni	TRUE		TESHOME	RFP_NA_1_6h_brain_LN308_NA_NA_Tuni_chx	FALSE	0.423892	0.174278
PRJNA316618	SRR3306589	242417925	12363314175	51	7884	SRX1667370		OTHER	other	TRANSCRIPTOMIC	SINGLE	0	0	ILLUMINA	Illumina HiSeq 2000	SRP072459	PRJNA316618	27153541		SRS1365642	SAMN04588789	simple	9606	Homo sapiens	GSM2100602	GEO	SRA399402	4	2016	Park	HeLa	Asynchronous cell ribosome profiling 2	RFP	2					ovary	HeLa		auto_839	TRUE		auto	RFP_NA_2_NA_ovary_HeLa_NA_NA_auto_839_NA	FALSE	0.422354	2.16762
PRJNA818335	SRR18402611	143779824	7188991200	50	2077	SRX14536494	GSM5964227	OTHER	other	TRANSCRIPTOMIC	SINGLE	0	0	ILLUMINA	Illumina NovaSeq 6000	SRP365126	PRJNA818335	36653366		SRS12333592	SAMN26855356	simple	9606	Homo sapiens	GSM5964227	Adrian Whitehouse, Faculty of Biological Sciences, University of Leeds	SRA1390089	12	2022	Murphy	TREx BCBL1-Rta	Repeat 1: BUD23 targetting shRNA - ribosome footprint RNA	RFP	1								auto_3359	TRUE		auto	RFP_NA_1_NA_NA_NA_NA_NA_auto_3359_NA	FALSE	0.422192	0.0677338
PRJNA576649	SRR10251276					SRX6969282		RNA-Seq	cDNA		SINGLE			ILLUMINA		SRP224952	PRJNA576649	31971508	576649	SRS5494848	SAMN13000198			Homo sapiens	GSM4114770	GEO	SRA975922	1	2020	Wangen	G418 500 ug/mL ribosome profiling B	RPF_4_allAG_4_G418_500_B	RFP	2	0.5k	chx			kidney	HEK293		G418	TRUE		PREETI	RFP_NA_2_NA_kidney_HEK293_0.5k_NA_G418_chx	FALSE	0.420357	0.110257
PRJNA472015	SRR7182549					SRX4099348		OTHER	other		SINGLE			ILLUMINA		SRP148422	PRJNA472015	30673779	472015	SRS3315533	SAMN09223525			Homo sapiens	GSM3146278	GEO	SRA706809	5	2018	Machkovech	A549 cells	ribosome footprints_cyclo_ifn_vir	RFP			chx			lung	A549		ifnvir	TRUE		TESHOME	RFP_NA_NA_NA_lung_A549_NA_NA_ifnvir_chx	FALSE	0.419966	0.0713174
PRJNA472636	SRR7207278					SRX4116263		OTHER	other		SINGLE			ILLUMINA		SRP148767	PRJNA472636	30089253	472636	SRS3331551	SAMN09238863			Homo sapiens	GSM3150290	GEO	SRA709715	7	2018	Gameiro	Breast epithelial cell	EtOH_NoCys_04hr.3	RFP	3	NoCys	chx		4h	breast	MCF10A		EtOH	TRUE		TESHOME	RFP_NA_3_4h_breast_MCF10A_NoCys_NA_EtOH_chx	FALSE	0.418609	0.19378
PRJNA453915	SRR7073147					SRX4003595		RNA-Seq	cDNA		SINGLE			ILLUMINA		SRP143452	PRJNA453915	30029003	453915	SRS3225397	SAMN08993022			Homo sapiens	GSM3118954	GEO	SRA696853	7	2018	Darnell	HEK293T cells, ATCC CRL-3216 + AAVS1:Flag-RagB-Q99L	ragbq99l_leu_6h	RFP			chx		6h	kidney	HEK293		ragbq99l_leu	TRUE		TESHOME	RFP_NA_NA_6h_kidney_HEK293_NA_NA_ragbq99l_leu_chx	FALSE	0.417635	0.0878563
PRJNA729461	SRR14510065	101304975	2265336988	22	1042	SRX10855878		OTHER	other	TRANSCRIPTOMIC	SINGLE	0	0	ILLUMINA	Illumina NovaSeq 6000	SRP319472	PRJNA729461	34226921		SRS8951509	SAMN19116492	simple	9606	Homo sapiens	GSM5291909	GEO	SRA1231346	7	2021	Ichihara	HEK293T cells	eIF2A KO HEK293T #2 arsenite Ribo-seq replicate 2	RFP	2	KO				kidney	HEK293	eIF2A	auto_2779	TRUE		auto	RFP_NA_2_NA_kidney_HEK293_KO_eIF2A_auto_2779_NA	FALSE	0.416936	0.162173
PRJNA809587	SRR18113901	38395715	5759357250	150	2045	SRX14264285	GSM5911788	OTHER	other	TRANSCRIPTOMIC	SINGLE	0	0	ILLUMINA	Illumina NovaSeq 6000	SRP361145	PRJNA809587	36074823		SRS12083245	SAMN26199035	simple	9606	Homo sapiens	GSM5911788	Wei Xie, School of Life Sciences, Tsinghua University	SRA1376840	10	2022	Zou	Preimplantation embryo	h_2cell_3PN_22_Ribo_rep2	RFP	2								auto_3324	TRUE		auto	RFP_NA_2_NA_NA_NA_NA_NA_auto_3324_NA	FALSE	0.416271	0.0369458
PRJEB23298	ERR2189765					ERX2245880	EV-A71_5hpi.rep2_s	OTHER	other		SINGLE			ILLUMINA		ERP105038	PRJEB23298		497718	ERS1992217	SAMEA104367239			Homo sapiens	SAMEA104367239	Dr. Valeria Lulla	ERA1125282	10	2018	Dinan		E-MTAB-6180:EV-A71_5hpi.rep2	RFP	2	A72	chx		5h	muscle	RD			TRUE		TESHOME	RFP_NA_2_5h_muscle_RD_A72_NA_NA_chx	FALSE	0.415774	0.0592937
PRJEB23398	ERR2193158					ERX2249181	ID31RPF_s	RNA-Seq	size fractionation		SINGLE			ILLUMINA		ERP105150	PRJEB23398	30082430	485091	ERS2000954	SAMEA104375976			Homo sapiens	SAMEA104375976	The Genome Analysis Centre, Norwich, UK	ERA1131598	8	2018	Lezina		E-MTAB-6196:ID31RPF	RFP	7		chx			blood	NONE			TRUE		TESHOME	RFP_NA_7_NA_blood_NONE_NA_NA_NA_chx	FALSE	0.415774	0.0152126
PRJNA545050	SRR9132359					SRX5906179		OTHER	other		SINGLE			ILLUMINA		SRP199612	PRJNA545050	31959994	545050	SRS4825475	SAMN11872202			Homo sapiens	GSM3820024	GEO	SRA890744	11	2019	Basak	adult erythroid cells	Adult1-ribosomeprofiling	RFP	2		chx	1		blood	CD34		adult	TRUE		TESHOME	RFP_1_2_NA_blood_CD34_NA_NA_adult_chx	FALSE	0.415774	0.032189
PRJNA667051	SRR12764799	12787860	378807137	29	169	SRX9235489		OTHER	other	TRANSCRIPTOMIC	SINGLE	0	0	ILLUMINA	NextSeq 500	SRP286182	PRJNA667051	35604092		SRS7468839	SAMN16351588	simple	9606	Homo sapiens	GSM4815970	GEO	SRA1137052	11	2020	Puray-Chavez	Primary human bronchial epithelial cells	Ribo-seq-HBEC-SARS2-lowMOI-24hpi	RFP		low							auto_2364	TRUE		auto	RFP_NA_NA_NA_NA_NA_low_NA_auto_2364_NA	FALSE	0.415774	0.0272413
PRJNA258219	SRR1551167					SRX680706		RNA-Seq	cDNA		SINGLE			ILLUMINA		SRP045501	PRJNA258219	25263593	258219	SRS684385	SAMN02990402			Homo sapiens	GSM1479600	GEO	SRA179319	7	2015	Eichhorn	HEK293T cell line	miR-1-transfected HEK293T RPF	RFP		mir1	chx			kidney	HEK293			TRUE		HÃ…KON	RFP_NA_NA_NA_kidney_HEK293_mir1_NA_NA_chx	FALSE	0.415774	0.0230825
PRJNA181016	SRR619092					SRX205668		RNA-Seq	size fractionation		SINGLE			ILLUMINA		SRP017263	PRJNA181016	23290916	181016	SRS376442	SAMN01816436			Homo sapiens	HEK293_PES	CORNELL	SRA061778	1	2013	Liu		HEK293_PES	RFP	1	PES	chx			kidney	HEK293			TRUE		HÃ…KON	RFP_NA_1_NA_kidney_HEK293_PES_NA_NA_chx	FALSE	0.415774	0.018223
PRJNA533074	SRR8907198					SRX5693019		OTHER	other		SINGLE			ILLUMINA		SRP192707	PRJNA533074	31167946	533074	SRS4632504	SAMN11433229			Homo sapiens	GSM3723763	GEO	SRA874614	5	2019	Holmes	Human Foreskin Fibroblasts	Riboseq_subconfluentHFF_rep2	RFP	2		chx		24h	skin	SCRC1041		Ctrl	TRUE		TESHOME	RFP_NA_2_24h_skin_SCRC1041_NA_NA_Ctrl_chx	FALSE	0.415774	0.0327308
PRJNA533074	SRR8907188					SRX5693009		OTHER	other		SINGLE			ILLUMINA		SRP192707	PRJNA533074	31167946	533074	SRS4632494	SAMN11433241			Homo sapiens	GSM3723753	GEO	SRA874614	5	2019	Holmes	Human Foreskin Fibroblasts and RH Toxoplasma	Riboseq_confluentHFF-RH_rep1	RFP	1		chx		48h	skin	SCRC1041		infe	TRUE		TESHOME	RFP_NA_1_48h_skin_SCRC1041_NA_NA_infe_chx	FALSE	0.415774	0.034958
PRJNA795419	SRR20307020	30908368	1545418400	50	466	SRX16340461	GSM6347758	OTHER	other	TRANSCRIPTOMIC	SINGLE	0	0	ILLUMINA	Illumina NovaSeq 6000	SRP353938	PRJNA795419	1		SRS13978464	SAMN29826183	simple	9606	Homo sapiens	GSM6347758	school of medicine, sysu	SRA1457614	2	2023	Makar	Hela cell	riboseq analysis in hela cells treated with control amo	RFP	1	WT				ovary	HeLa		auto_3274	TRUE		auto	RFP_NA_1_NA_ovary_HeLa_WT_NA_auto_3274_NA	FALSE	0.415774	0.0293194
PRJNA275386	SRR1803169					SRX876746		OTHER	other		SINGLE			ILLUMINA		SRP055009	PRJNA275386	26297486	275386	SRS845402	SAMN03344049			Homo sapiens	GSM1609400	GEO	SRA241011	2	2015	Cenik	EBV-transformed lymphoblastoid cells	GM18523_Rep3	RFP	3		chx			bone	LCL		GM18523	TRUE		KORNEL	RFP_NA_3_NA_bone_LCL_NA_NA_GM18523_chx	FALSE	0.415096	0.044096
PRJNA300627	SRR2873533					SRX1402244		OTHER	other		SINGLE			ILLUMINA		SRP065528	PRJNA300627	26878238	300627	SRS1141529	SAMN04226645			Homo sapiens	GSM1921990	GEO	SRA308231	2	2016	Loayza-Puch	PC3 cell line	PC3 ASNase batch1 RP	RFP	2	ASNase	chx	1		prostate	PC3		ASNase	TRUE		KORNEL	RFP_1_2_NA_prostate_PC3_ASNase_NA_ASNase_chx	FALSE	0.414943	1.49493
PRJNA533132	SRR8915514	36350034	2762602584	76	1042	SRX5696968		OTHER	other	TRANSCRIPTOMIC	SINGLE	0	0	ILLUMINA	NextSeq 500	SRP192770	PRJNA533132	1		SRS4636176	SAMN11440436	simple	9606	Homo sapiens	GSM3725001	GEO	SRA875251	8	2022	Makar	ribosome profiling	#NAME?	RFP	2								auto_1348	TRUE		auto	RFP_NA_2_NA_NA_NA_NA_NA_auto_1348_NA	FALSE	0.414835	0.0875311
PRJNA729461	SRR14510064	28438281	670967115	23	293	SRX10855877		OTHER	other	TRANSCRIPTOMIC	SINGLE	0	0	ILLUMINA	Illumina NovaSeq 6000	SRP319472	PRJNA729461	34226921		SRS8951508	SAMN19116493	simple	9606	Homo sapiens	GSM5291908	GEO	SRA1231346	7	2021	Ichihara	HEK293T cells	eIF2A KO HEK293T #2 arsenite Ribo-seq replicate 1	RFP	1	KO				kidney	HEK293	eIF2A	auto_2778	TRUE		auto	RFP_NA_1_NA_kidney_HEK293_KO_eIF2A_auto_2778_NA	FALSE	0.414479	0.0873807
PRJNA707431	SRR13884516	48569657	1491119359	30	806	SRX10264793		OTHER	other	TRANSCRIPTOMIC	SINGLE	0	0	ILLUMINA	Illumina NovaSeq 6000	SRP309704	PRJNA707431	35137207		SRS8398421	SAMN18205304	simple	9606	Homo sapiens	GSM5140239	GEO	SRA1203922	7	2021	Luan	Cell line:A549	siL7.Riboseq	RFP	1					lung	A549		auto_2602	TRUE		auto	RFP_NA_1_NA_lung_A549_NA_NA_auto_2602_NA	FALSE	0.413272	0.34152
PRJNA152347	SRR403889					SRX118292	GSM869043: Footprint for vehicle treated PC3 cells, replicate #2.	RNA-Seq	cDNA		SINGLE			ILLUMINA		SRP010679	PRJNA152347	22367541	152347	SRS290861	SAMN00779924			Homo sapiens	GSM869043	GEO	SRA049772	2	2012	Hsieh	PC3 human prostate cancer cells	Footprint for vehicle treated PC3 cells, replicate #2.	RFP	2	WT	chx			prostate	PC3			TRUE		HÃ…KON	RFP_NA_2_NA_prostate_PC3_WT_NA_NA_chx	FALSE	0.413182	0.0732659
PRJNA453915	SRR7073132					SRX4003580		RNA-Seq	cDNA		SINGLE			ILLUMINA		SRP143452	PRJNA453915	30029003	453915	SRS3225382	SAMN08993043			Homo sapiens	GSM3118939	GEO	SRA696853	7	2018	Darnell	HEK293T cells, ATCC CRL-3216 + AAVS1:hrGFP	293t_hrgfp_argtorin1_3h	RFP			chx		3h	kidney	HEK293		hrgfp_argtorin1	TRUE		TESHOME	RFP_NA_NA_3h_kidney_HEK293_NA_NA_hrgfp_argtorin1_chx	FALSE	0.412758	0.101564
PRJNA287879	SRR2075936					SRX1070869		OTHER	other		SINGLE			ILLUMINA		SRP059825	PRJNA287879	27309803	287879	SRS969980	SAMN03788118			Homo sapiens	GSM1720814	GEO	SRA274158	6	2016	Iwasaki	HEK 293 T-Rex_ribo_DMSO	ribo_DMSO_replicate3 [Sample 12]	RFP	3		chx			kidney	HEK293		dmso	TRUE		KORNEL	RFP_NA_3_NA_kidney_HEK293_NA_NA_dmso_chx	FALSE	0.412051	0.220062
PRJNA509149	SRR8309255					SRX5123185		OTHER	other		SINGLE			ILLUMINA		SRP173217	PRJNA509149	30626644	509149	SRS4136500	SAMN10564021			Homo sapiens	GSM3506287	GEO	SRA822679	12	2018	Walczak	Cytosolic fraction from HEK293 cells	wt_cyto_a	RFP	1	WT	chx			kidney	HEK293		cyto	TRUE		TESHOME	RFP_NA_1_NA_kidney_HEK293_WT_NA_cyto_chx	FALSE	0.410554	0.00755387
PRJNA453915	SRR7073122					SRX4003570		RNA-Seq	cDNA		SINGLE			ILLUMINA		SRP143452	PRJNA453915	30029003	453915	SRS3225373	SAMN08993039			Homo sapiens	GSM3118929	GEO	SRA696853	7	2018	Darnell	HEK293T cells, ATCC CRL-3216	293t_rpC_arg_6h	RFP			chx		6h	kidney	HEK293		rpC_arg	TRUE		TESHOME	RFP_NA_NA_6h_kidney_HEK293_NA_NA_rpC_arg_chx	FALSE	0.410036	0.163297
PRJNA287136	SRR2064440					SRX1059906		OTHER	other		SINGLE			ILLUMINA		SRP059546	PRJNA287136	26878238	287136	SRS962189	SAMN03776754			Homo sapiens	GSM1712838	GEO	SRA273143	7	2017	Loayza-Puch	SUM159 cell line	SUM159 batch3d leucine starvation 0x 12h RP	RFP	2	starvation	chx	3	12h	breast	SUM159			TRUE		KORNEL	RFP_3_2_12h_breast_SUM159_starvation_NA_NA_chx	FALSE	0.409686	0.609141
PRJNA756018	SRR15513155	95744067	3366650374	35	1366	SRX11811949		RNA-Seq	cDNA	TRANSCRIPTOMIC	SINGLE	0	0	ILLUMINA	NextSeq 500	SRP333128	PRJNA756018	35841888		SRS9826467	SAMN20849940	simple	9606	Homo sapiens	GSM5527680	GEO	SRA1280330	7	2022	Chothani	untreated human embryonic stem cells	ES_3 (RiboSeq)	RFP	1								auto_2976	TRUE		auto	RFP_NA_1_NA_NA_NA_NA_NA_auto_2976_NA	FALSE	0.409392	0.388806
PRJNA665035	SRR14667088					SRX11005666		OTHER	other		SINGLE			ILLUMINA		SRP284977	PRJNA665035	32995776	665035	SRS9079686	SAMN19367820			Homo sapiens	GSM5342778	GEO	SRA1129972	6	2021	Rao	non-small cell lung carcinoma	NSP2-H1299-1_ribo	RFP	1	OE	chx			lung	H1299	NSP2		TRUE		PREETI	RFP_NA_1_NA_lung_H1299_OE_NSP2_NA_chx	FALSE	0.408897	0.165854
PRJNA591625	SRR10530127					SRX7214136		OTHER	other		SINGLE			ILLUMINA		SRP233222	PRJNA591625	33330931	591625	SRS5716939	SAMN13385785			Homo sapiens	GSM4192111	GEO	SRA1002630	11	2020	Selmi	human embryonic stem cells	H9.KO2.2.4_Ribo-seq	RFP	4	KO	chx	2		embryonic	H9		2	TRUE		PREETI	RFP_2_4_NA_embryonic_H9_KO_NA_2_chx	FALSE	0.408886	0.0575164
PRJNA472636	SRR7207276					SRX4116261		OTHER	other		SINGLE			ILLUMINA		SRP148767	PRJNA472636	30089253	472636	SRS3331549	SAMN09238866			Homo sapiens	GSM3150288	GEO	SRA709715	7	2018	Gameiro	Breast epithelial cell	TAM_NoQ_04hr.2	RFP	2	NoQ	chx		4h	breast	MCF10A		TAM	TRUE		TESHOME	RFP_NA_2_4h_breast_MCF10A_NoQ_NA_TAM_chx	FALSE	0.407905	0.152335
PRJNA714824	SRR13976755	129551827	6607143177	51	2225	SRX10354414		RNA-Seq	cDNA	TRANSCRIPTOMIC	SINGLE	0	0	ILLUMINA	NextSeq 550	SRP310845	PRJNA714824	34871442		SRS8472700	SAMN18318635	simple	9606	Homo sapiens	GSM5173412	GEO	SRA1206835	12	2021	Bohlen	HeLa Cells	p-RPS6 selective Riosome footprints from HeLa cells	RFP	1					ovary	HeLa			TRUE		auto	RFP_NA_1_NA_ovary_HeLa_NA_NA_NA_NA	FALSE	0.407461	1.04422
PRJNA870413	SRR21102203	78742258	4015855158	51	1780	SRX17115751	GSM6470172	OTHER	other	TRANSCRIPTOMIC	SINGLE	0	0	ILLUMINA	NextSeq 550	SRP392653	PRJNA870413	1		SRS14689928	SAMN30370418	simple	9606	Homo sapiens	GSM6470172	AG Teleman, B140, DKFZ	SRA1519790	2	2023	Makar	HeLa	R1_80S_IPC	RFP	1	WT				ovary	HeLa			TRUE		HÃ¥kon	RFP_NA_1_NA_ovary_HeLa_WT_NA_NA_NA	FALSE	0.4065	1.46092
PRJNA316618	SRR3306587	242516177	12368325027	51	7970	SRX1667368		OTHER	other	TRANSCRIPTOMIC	SINGLE	0	0	ILLUMINA	Illumina HiSeq 2000	SRP072459	PRJNA316618	27153541		SRS1365638	SAMN04588787	simple	9606	Homo sapiens	GSM2100600	GEO	SRA399402	4	2016	Park	HeLa	M phase ribosome profiling synchronized by shake off	RFP						ovary	HeLa			TRUE		auto	RFP_NA_NA_NA_ovary_HeLa_NA_NA_NA_NA	FALSE	0.406336	1.9897
PRJNA806946	SRR18017740	39185167	1403837197	35	523	SRX14171975	GSM5899117	RNA-Seq	cDNA	TRANSCRIPTOMIC	SINGLE	0	0	ILLUMINA	NextSeq 2000	SRP359785	PRJNA806946	36433934		SRS11995938	SAMN25941485	simple	9606	Homo sapiens	GSM5899117	van Heesch, Princess Maxima Center	SRA1372962	12	2022	Palomar-Siles	epithelial	Ribo-Seq H1299-R213XG418-5	RFP	1								auto_3318	TRUE		auto	RFP_NA_1_NA_NA_NA_NA_NA_auto_3318_NA	FALSE	0.405548	0.13042
PRJNA801861	SRR17818680	129760506	9732037950	75	2723	SRX13980545	GSM5848573	OTHER	other	TRANSCRIPTOMIC	SINGLE	0	0	ILLUMINA	Illumina NovaSeq 6000	SRP357375	PRJNA801861	1		SRS11817868	SAMN25408098	simple	9606	Homo sapiens	GSM5848573	????	SRA1364092	2	2022	Makar	cervical cancer	HeLa1014_2R for Ribo-seq	RFP	1					ovary	HeLa		auto_3298	TRUE		auto	RFP_NA_1_NA_ovary_HeLa_NA_NA_auto_3298_NA	FALSE	0.404822	0.286913
PRJNA448763	SRR6939955					SRX3884306		OTHER	other		SINGLE			ILLUMINA		SRP137150	PRJNA448763	31281537	448763	SRS3123576	SAMN08864558			Homo sapiens	GSM3081766	GEO	SRA681490	6	2019	Zou	tumor_RPF	LC507_tumor_RPF	RFP	8		chx			liver	NONE		tumor	TRUE		TESHOME	RFP_NA_8_NA_liver_NONE_NA_NA_tumor_chx	FALSE	0.404706	0.0285727
PRJNA300627	SRR2873532					SRX1402244		OTHER	other		SINGLE			ILLUMINA		SRP065528	PRJNA300627	26878238	300627	SRS1141529	SAMN04226645			Homo sapiens	GSM1921990	GEO	SRA308231	2	2016	Loayza-Puch	PC3 cell line	PC3 ASNase batch1 RP	RFP	1	ASNase	chx	1		prostate	PC3		ASNase	TRUE		KORNEL	RFP_1_1_NA_prostate_PC3_ASNase_NA_ASNase_chx	FALSE	0.404588	1.78978
PRJNA729461	SRR14510076	52748897	1313813926	24	572	SRX10855889		OTHER	other	TRANSCRIPTOMIC	SINGLE	0	0	ILLUMINA	Illumina NovaSeq 6000	SRP319472	PRJNA729461	34226921		SRS8951520	SAMN19116441	simple	9606	Homo sapiens	GSM5291920	GEO	SRA1231346	7	2021	Ichihara	HEK293T cells	eIF2A, eIF2D DKO HEK293T #1 arsenite Ribo-seq replicate 1	RFP	1	KO				kidney	HEK293	eIF2A, eIF2D D	auto_2784	TRUE		auto	RFP_NA_1_NA_kidney_HEK293_KO_eIF2A, eIF2D D_auto_2784_NA	FALSE	0.40449	0.0616086
PRJNA533132	SRR8915508	42445859	3225885284	76	1191	SRX5696962		OTHER	other	TRANSCRIPTOMIC	SINGLE	0	0	ILLUMINA	NextSeq 500	SRP192770	PRJNA533132	1		SRS4636170	SAMN11440442	simple	9606	Homo sapiens	GSM3724995	GEO	SRA875251	8	2022	Makar	ribosome profiling	LogPhase_monosome_rep.2	RFP	2									TRUE		auto	RFP_NA_2_NA_NA_NA_NA_NA_NA_NA	FALSE	0.404229	0.0290363
PRJNA275386	SRR1803183					SRX876760		OTHER	other		SINGLE			ILLUMINA		SRP055009	PRJNA275386	26297486	275386	SRS845393	SAMN03344016			Homo sapiens	GSM1609414	GEO	SRA241011	2	2015	Cenik	EBV-transformed lymphoblastoid cells	GM19193_Rep1	RFP	1		chx			bone	LCL		GM19193	TRUE		KORNEL	RFP_NA_1_NA_bone_LCL_NA_NA_GM19193_chx	FALSE	0.404029	0.0311035
PRJNA453915	SRR7073152					SRX4003600		RNA-Seq	cDNA		SINGLE			ILLUMINA		SRP143452	PRJNA453915	30029003	453915	SRS3225402	SAMN08993017			Homo sapiens	GSM3118959	GEO	SRA696853	7	2018	Darnell	HEK293T cells, ATCC CRL-3216	293t_arg_6h	RFP			chx		6h	kidney	HEK293		2arg	TRUE		TESHOME	RFP_NA_NA_6h_kidney_HEK293_NA_NA_2arg_chx	FALSE	0.403851	0.0516145
PRJNA439265	SRR6869755					SRX3824010		RNA-Seq	cDNA		SINGLE			ILLUMINA		SRP136094	PRJNA439265	31174582	439265	SRS3073338	SAMN08743009			Homo sapiens	GSM3057212	GEO	SRA668547	5	2019	BornelÃ¶v	H9 cells	Riboseq differentiating rep1	RFP	1		chx			blood	H9		diff	TRUE		TESHOME	RFP_NA_1_NA_blood_H9_NA_NA_diff_chx	FALSE	0.403658	0.199457
PRJNA589466	SRR10441367					SRX7136113		RNA-Seq	cDNA		SINGLE			ILLUMINA		SRP229759	PRJNA589466	32821933	589466	SRS5645031	SAMN13281628			Homo sapiens	GSM4160135	GEO	SRA995632	8	2020	Patel	miR-1 expressing cells	miR-1 expressing cells rep 2 [Ribo-seq]	RFP	2	OE	chx			kidney	HEK293		mir1	TRUE		PREETI	RFP_NA_2_NA_kidney_HEK293_OE_NA_mir1_chx	FALSE	0.403501	0.43711
PRJNA260073	SRR1562930					SRX691060		OTHER	other		SINGLE			ILLUMINA		SRP046016	PRJNA260073	25378630	260073	SRS693527	SAMN03015574			Homo sapiens	GSM1495536	GEO	SRA181105	11	2014	Jan	HEK293T	BirAmCherrySec61beta_+CHX_10minBiotin_pulldown	RFP	1	PD	chx			kidney	HEK293			TRUE		HÃ…KON	RFP_NA_1_NA_kidney_HEK293_PD_NA_NA_chx	FALSE	0.403215	0.0576936
PRJNA665035	SRR12693493					SRX9173291		OTHER	other		SINGLE			ILLUMINA		SRP284977	PRJNA665035	32995776	665035	SRS7410869	SAMN16238715			Homo sapiens	GSM4798520	GEO	SRA1129972	10	2020	Rao	HEK293	NSP1-HEK-2_ribo	RFP	2	OE	chx			kidney	HEK293	NSP1		TRUE		PREETI	RFP_NA_2_NA_kidney_HEK293_OE_NSP1_NA_chx	FALSE	0.40283	0.146411
PRJNA268354	SRR1661497					SRX767139		OTHER	other		SINGLE			ILLUMINA		SRP050213	PRJNA268354	26046440	268354	SRS751238	SAMN03218425			Homo sapiens	GSM1553254	GEO	SRA204377	6	2015	Wang	HeLa cell	Ribosome profiling rep2-SiYTHDF1_8-RPF	RFP	2	KD	chx			ovary	HeLa			TRUE		HÃ…KON	RFP_NA_2_NA_ovary_HeLa_KD_NA_NA_chx	FALSE	0.402153	0.0244215
PRJNA258219	SRR1551163					SRX680702		RNA-Seq	cDNA		SINGLE			ILLUMINA		SRP045501	PRJNA258219	25263593	258219	SRS684380	SAMN02990373			Homo sapiens	GSM1479596	GEO	SRA179319	7	2015	Eichhorn	U2OS cell line	miR-155-transfected U2OS RPF	RFP		mir155	chx			bone	U2OS			TRUE		HÃ…KON	RFP_NA_NA_NA_bone_U2OS_mir155_NA_NA_chx	FALSE	0.401945	0.0213176
PRJNA292020	SRR2146894					SRX1134555		OTHER	other		SINGLE			ILLUMINA		SRP062074	PRJNA292020	26595770	292020	SRS1024437	SAMN03959897			Homo sapiens	GSM1844760	GEO	SRA282320	11	2015	Siprashvili	CHL-1 melanoma cells	10mM AZC + MG132 - rRNA removed	RFP		KD	chx			skin	CHL1		10mM_AZC_rRNAdep	TRUE		KORNEL	RFP_NA_NA_NA_skin_CHL1_KD_NA_10mM_AZC_rRNAdep_chx	FALSE	0.401934	0.0740583
PRJNA599422	SRR10846535					SRX7517158		OTHER	other		SINGLE			ILLUMINA		SRP239882	PRJNA599422		599422	SRS5956824	SAMN13750410			Homo sapiens	GSM4255700	GEO	SRA1021798	8	2020	Ouspenskaia	Hmel	Hmel_rep1	RFP	1		chx	1		breast	Hmel			TRUE		PREETI	RFP_1_1_NA_breast_Hmel_NA_NA_NA_chx	FALSE	0.401547	0.0976213
PRJNA663848	SRR12651189					SRX9132413		OTHER	other		SINGLE			ILLUMINA		SRP282584	PRJNA663848	33556964	663848	SRS7374661	SAMN16179953			Homo sapiens	GSM4787168	GEO	SRA1126237	1	2021	Karasik	whole cell	AK011F: A549 wt, 10 ÂµM trimer 2-5A, 4.5 h	RFP	1	WT	chx		4.5h	lung	A549		2to5A_10_tri	TRUE		PREETI	RFP_NA_1_4.5h_lung_A549_WT_NA_2to5A_10_tri_chx	FALSE	0.401293	0.0189612
PRJEB23298	ERR2189768					ERX2245883	EV_4hpi.rep1_s	OTHER	other		SINGLE			ILLUMINA		ERP105038	PRJEB23298		497718	ERS1992220	SAMEA104367242			Homo sapiens	SAMEA104367242	Dr. Valeria Lulla	ERA1125282	10	2018	Dinan		E-MTAB-6180:EV_4hpi.rep1	RFP	1	EV	chx		4h	muscle	RD			TRUE		TESHOME	RFP_NA_1_4h_muscle_RD_EV_NA_NA_chx	FALSE	0.401185	0.0226908
PRJNA727298	SRR14421810					SRX10773168		OTHER	other		SINGLE			ILLUMINA		SRP318452	PRJNA727298	34107246	727298	SRS8861852	SAMN19014965			Homo sapiens	GSM5281843	GEO	SRA1228234	6	2021	Wu	HEK293 cells	HEK293 si-Hsp70L1_si-Pelo DMSO rep2	RFP	2	KD	chx			kidney	HEK293	H_P	dmso	TRUE		PREETI	RFP_NA_2_NA_kidney_HEK293_KD_H_P_dmso_chx	FALSE	0.400908	0.131032
PRJNA665035	SRR12693495					SRX9173293		OTHER	other		SINGLE			ILLUMINA		SRP284977	PRJNA665035	32995776	665035	SRS7410871	SAMN16238713			Homo sapiens	GSM4798522	GEO	SRA1129972	10	2020	Rao	HEK293	NSP2-HEK-1_ribo	RFP	1	OE	chx			kidney	HEK293	NSP2		TRUE		PREETI	RFP_NA_1_NA_kidney_HEK293_OE_NSP2_NA_chx	FALSE	0.400713	0.189462
PRJNA272597	SRR1758392					SRX842642		RNA-Seq	cDNA		SINGLE			ILLUMINA		SRP052229	PRJNA272597	26729373	272597	SRS818816	SAMN03284311			Homo sapiens	GSM1585224	GEO	SRA231648	1	2016	Xu	Human fibroblast	7_corr d-leucine rep2 RPF	RFP	2	CORR	chx	2		fibroblast	NONE		dLeucine	TRUE		KORNEL	RFP_2_2_NA_fibroblast_NONE_CORR_NA_dLeucine_chx	FALSE	0.399524	0.0613298
PRJNA439265	SRR6869758					SRX3824013		RNA-Seq	cDNA		SINGLE			ILLUMINA		SRP136094	PRJNA439265	31174582	439265	SRS3073341	SAMN08743006			Homo sapiens	GSM3057215	GEO	SRA668547	5	2019	BornelÃ¶v	H9 cells	Riboseq differentiating rep4	RFP	4		chx			blood	H9		diff	TRUE		TESHOME	RFP_NA_4_NA_blood_H9_NA_NA_diff_chx	FALSE	0.398605	0.0515978
PRJNA591625	SRR10530139					SRX7214143		OTHER	other		SINGLE			ILLUMINA		SRP233222	PRJNA591625	33330931	591625	SRS5716946	SAMN13385773			Homo sapiens	GSM4192118	GEO	SRA1002630	11	2020	Selmi	human embryonic stem cells	H9.WT.1.2_Ribo-seq	RFP	2	WT	chx	1		embryonic	H9			TRUE		PREETI	RFP_1_2_NA_embryonic_H9_WT_NA_NA_chx	FALSE	0.398131	0.106642
PRJNA473925	SRR7240721	63315693	3672310194	58	1220	SRX4146502		OTHER	other	TRANSCRIPTOMIC	SINGLE	0	0	ILLUMINA	Illumina HiSeq 2500	SRP149426	PRJNA473925	30297778		SRS3360119	SAMN09288577	simple	9606	Homo sapiens	GSM3168232	GEO	SRA713134	8	2018	Zhang	WT Riboseq	WT Riboseq rep1	RFP	1	WT								TRUE		auto	RFP_NA_1_NA_NA_NA_WT_NA_NA_NA	FALSE	0.397789	0.616039
PRJNA521751	SRR8558081					SRX5359741		OTHER	other		SINGLE			ILLUMINA		SRP185496	PRJNA521751	31619139	521751	SRS4350375	SAMN10910521			Homo sapiens	GSM3597563	GEO	SRA848188	10	2019	Aliouat	colon cancer cell line	RIBOSEQ-WT-2	RFP	2	WT	chx			colon	HTC116			TRUE		TESHOME	RFP_NA_2_NA_colon_HTC116_WT_NA_NA_chx	FALSE	0.397007	0.48241
PRJNA129385	SRR057512					SRX021966	GSM546920: Footprint_mock_32hr_runs1-2	RNA-Seq	cDNA		SINGLE			ILLUMINA		SRP002605	PRJNA129385	20703300	129385	SRS079385	SAMN00014830			Homo sapiens	GSM546920	GEO	SRA020150	8	2010	Guo	HeLa	Footprint_mock_32hr_runs1-2	RFP	2	WT	chx		32h	ovary	HeLa			TRUE		HÃ…KON	RFP_NA_2_32h_ovary_HeLa_WT_NA_NA_chx	FALSE	0.396708	0.063408
PRJNA401882	SRR5990817					SRX3146516		OTHER	cDNA		SINGLE			ILLUMINA		SRP131318	PRJNA401882	29696588	401882	SRS2478475	SAMN07573561			Homo sapiens	GSM2760249	GEO	SRA604097	5	2018	Lin	muscle and virus	Infect,1.75 h, RPF	RFP	6	infected	chx		1h	muscle	NONE			TRUE		TESHOME	RFP_NA_6_1h_muscle_NONE_infected_NA_NA_chx	FALSE	0.396687	0.3342
PRJNA664116	SRR12660873	64435036	1933905331	30	884	SRX9141925		OTHER	other	TRANSCRIPTOMIC	SINGLE	0	0	ILLUMINA	NextSeq 500	SRP282906	PRJNA664116	34615539		SRS7383237	SAMN16198230	simple	9606	Homo sapiens	GSM4793172	GEO	SRA1127134	8	2021	Gillen	HEK293 cells	Ribo-Seq siCNOT1 Replicate 2	RFP	2					kidney	HEK293			TRUE		auto	RFP_NA_2_NA_kidney_HEK293_NA_NA_NA_NA	FALSE	0.396653	0.400148
PRJNA287879	SRR2075937					SRX1070870		OTHER	other		SINGLE			ILLUMINA		SRP059825	PRJNA287879	27309803	287879	SRS969979	SAMN03788119			Homo sapiens	GSM1720815	GEO	SRA274158	6	2016	Iwasaki	HEK 293 T-Rex_ribo_DMSO	ribo_DMSO_replicate4 [Sample 13]	RFP	4		chx			kidney	HEK293		dmso	TRUE		KORNEL	RFP_NA_4_NA_kidney_HEK293_NA_NA_dmso_chx	FALSE	0.396113	0.168475
PRJNA218051	SRR970538					SRX345302		RNA-Seq	size fractionation		SINGLE			ILLUMINA		SRP029589	PRJNA218051	24120665	218051	SRS476841	SAMN02344694			Homo sapiens	Hela G1 RP CS28	UNIVERSITY OF CALIFORNIA SAN FRANCISCO	SRA099816	7	2015	Stumpf		G1 synch hela RP 2	RFP	2	G1	chx			ovary	HeLa			TRUE		HÃ…KON	RFP_NA_2_NA_ovary_HeLa_G1_NA_NA_chx	FALSE	0.395426	2.52334
PRJNA727298	SRR14421814					SRX10773172		OTHER	other		SINGLE			ILLUMINA		SRP318452	PRJNA727298	34107246	727298	SRS8861856	SAMN19014961			Homo sapiens	GSM5281847	GEO	SRA1228234	6	2021	Wu	HEK293 cells	HEK293 si-Hsp70L1 Thapsigargin rep2	RFP	2	KD	chx			kidney	HEK293	HSP70	thaps	TRUE		PREETI	RFP_NA_2_NA_kidney_HEK293_KD_HSP70_thaps_chx	FALSE	0.394618	0.0665448
PRJNA729461	SRR14510077	41284082	958241403	23	424	SRX10855890		OTHER	other	TRANSCRIPTOMIC	SINGLE	0	0	ILLUMINA	Illumina NovaSeq 6000	SRP319472	PRJNA729461	34226921		SRS8951521	SAMN19116440	simple	9606	Homo sapiens	GSM5291921	GEO	SRA1231346	7	2021	Ichihara	HEK293T cells	eIF2A, eIF2D DKO HEK293T #1 arsenite Ribo-seq replicate 2	RFP	2	KO				kidney	HEK293	eIF2A, eIF2D D	auto_2785	TRUE		auto	RFP_NA_2_NA_kidney_HEK293_KO_eIF2A, eIF2D D_auto_2785_NA	FALSE	0.394349	0.05625
PRJNA556267	SRR9737074	54360154	2772367854	51	844	SRX6494020		OTHER	other	TRANSCRIPTOMIC	SINGLE	0	0	ILLUMINA	Illumina HiSeq 4000	SRP216083	PRJNA556267	32348767		SRS5142589	SAMN12346082	simple	9606	Homo sapiens	GSM3966953	GEO	SRA925389	1	2020	Groenke	Transfected HEK 293T cells	Ribosome profiling from 72min Replicate 1	RFP	1					kidney	HEK293		auto_1762	TRUE		auto	RFP_NA_1_NA_kidney_HEK293_NA_NA_auto_1762_NA	FALSE	0.394251	0.16159
PRJNA729461	SRR14510061	59124643	1441835708	24	630	SRX10855874		OTHER	other	TRANSCRIPTOMIC	SINGLE	0	0	ILLUMINA	Illumina NovaSeq 6000	SRP319472	PRJNA729461	34226921		SRS8951505	SAMN19116496	simple	9606	Homo sapiens	GSM5291905	GEO	SRA1231346	7	2021	Ichihara	HEK293T cells	eIF2A KO HEK293T #1 arsenite Ribo-seq replicate 2	RFP	2	KO				kidney	HEK293	eIF2A	auto_2777	TRUE		auto	RFP_NA_2_NA_kidney_HEK293_KO_eIF2A_auto_2777_NA	FALSE	0.393671	0.068727
PRJNA353260	SRR5013260					SRX2343261	2200	RNA-Seq	cDNA		SINGLE			ILLUMINA		SRP093314	PRJNA353260	28003488	353260	SRS1795335	SAMN06013485			Homo sapiens	RPF mock 8h	SUN YAT-SEN UNIVERSITY	SRA492656	12	2016	Dai			RFP	1	WT	chx		8h	ovary	HeLa			TRUE		KORNEL	RFP_NA_1_8h_ovary_HeLa_WT_NA_NA_chx	FALSE	0.392598	3.01225
PRJNA414611	SRR6181562					SRX3292095		OTHER	other		SINGLE			ILLUMINA		SRP120157	PRJNA414611	30591072	414611	SRS2601274	SAMN07795664			Homo sapiens	GSM2817686	GEO	SRA620345	4	2018	Murat	ATCC Cell Lines	RPF-DHX36-3	RFP	3		chx	2		ovary	HeLa		DHX36	TRUE		TESHOME	RFP_2_3_NA_ovary_HeLa_NA_NA_DHX36_chx	FALSE	0.392477	0.248076
PRJNA218051	SRR970565					SRX345306		RNA-Seq	size fractionation		SINGLE			ILLUMINA		SRP029589	PRJNA218051	24120665	218051	SRS476845	SAMN02344698			Homo sapiens	Hela S RP CS9	UNIVERSITY OF CALIFORNIA SAN FRANCISCO	SRA099816	7	2015	Stumpf		S-phase hela RP 2	RFP	2	S	chx			ovary	HeLa			TRUE		HÃ…KON	RFP_NA_2_NA_ovary_HeLa_S_NA_NA_chx	FALSE	0.392034	2.17835
PRJNA244941	SRR1257263					SRX522495		OTHER	other		SINGLE			ILLUMINA		SRP041298	PRJNA244941	26338483	244941	SRS594850	SAMN02730034			Homo sapiens	GSM1371481	GEO	SRA158793	8	2015	Jang	U2-OS Cells	Bmal1_kd_ribo_profile_CT04_rep2	RFP	2	KD	chx			bone	U2OS		CT04	TRUE		HÃ…KON	RFP_NA_2_NA_bone_U2OS_KD_NA_CT04_chx	FALSE	0.392032	0.117285
PRJNA478455	SRR7451190					SRX4321698	D17-4819	OTHER	RT-PCR		SINGLE			ILLUMINA		SRP151602	PRJNA478455	30466063	478455	SRS3484165	SAMN09516436			Homo sapiens	RP30-1	MASSACHUSETTS INSTITUTE OF TECHNOLOGY	SRA730597	6	2018	Rothenberg		RFP_PBS_30_min_Rep_1	RFP	1		chx		30m	breast	MCF10A		PBS	TRUE		TESHOME	RFP_NA_1_30m_breast_MCF10A_NA_NA_PBS_chx	FALSE	0.391685	1.11391
PRJNA218051	SRR970490					SRX345301		RNA-Seq	size fractionation		SINGLE			ILLUMINA		SRP029589	PRJNA218051	24120665	218051	SRS476840	SAMN02344693			Homo sapiens	Hela G1 RP CS26	UNIVERSITY OF CALIFORNIA SAN FRANCISCO	SRA099816	7	2015	Stumpf		G1 synch hela RP 1	RFP	1	G1	chx			ovary	HeLa			TRUE		HÃ…KON	RFP_NA_1_NA_ovary_HeLa_G1_NA_NA_chx	FALSE	0.391678	1.40283
PRJNA278390	SRR1916548					SRX957357		RNA-Seq	cDNA		SINGLE			ILLUMINA		SRP056200	PRJNA278390	26538417	278390	SRS874705	SAMN03418215			Homo sapiens	GSM1634449	GEO	SRA246838	11	2015	Elkon	U2OS, Torin-1	Torin.rp.lane1	RFP	1	treated	chx	1		bone	U2OS		Torin	TRUE		KORNEL	RFP_1_1_NA_bone_U2OS_treated_NA_Torin_chx	FALSE	0.391195	0.125551
PRJNA478455	SRR7451191					SRX4321697	D17-4820	OTHER	RT-PCR		SINGLE			ILLUMINA		SRP151602	PRJNA478455	30466063	478455	SRS3484164	SAMN09516437			Homo sapiens	RP60-1	MASSACHUSETTS INSTITUTE OF TECHNOLOGY	SRA730597	6	2018	Rothenberg		RFP_PBS_60_min_Rep_1	RFP	1		chx		60m	breast	MCF10A		PBS	TRUE		TESHOME	RFP_NA_1_60m_breast_MCF10A_NA_NA_PBS_chx	FALSE	0.390903	1.44559
PRJNA729461	SRR14510068	40995418	1000399422	24	437	SRX10855881		OTHER	other	TRANSCRIPTOMIC	SINGLE	0	0	ILLUMINA	Illumina NovaSeq 6000	SRP319472	PRJNA729461	34226921		SRS8951512	SAMN19116449	simple	9606	Homo sapiens	GSM5291912	GEO	SRA1231346	7	2021	Ichihara	HEK293T cells	eIF2D KO HEK293T #1 arsenite Ribo-seq replicate 1	RFP	1	KO				kidney	HEK293	eIF2D	auto_2780	TRUE		auto	RFP_NA_1_NA_kidney_HEK293_KO_eIF2D_auto_2780_NA	FALSE	0.39089	0.0720041
PRJNA854905	SRR19918536	13528868	676443400	50	336	SRX15961072	GSM6284788	OTHER	other	TRANSCRIPTOMIC	SINGLE	0	0	ILLUMINA	Illumina HiSeq 2500	SRP384536	PRJNA854905	35891396		SRS13647414	SAMN29472420	simple	9606	Homo sapiens	GSM6284788	Kamini Singh, Molecular Pharmacology, Albert Einstein College of Medicine	SRA1447869	7	2022	Singh	primary hNPC	A3_ribo	RFP	8					throat	NPC		auto_3481	TRUE		auto	RFP_NA_8_NA_throat_NPC_NA_NA_auto_3481_NA	FALSE	0.390673	0.044418
PRJNA415390	SRR6202820					SRX3312742		OTHER	other		SINGLE			ILLUMINA		SRP120964	PRJNA415390	31601799	415390	SRS2618698	SAMN07822279			Homo sapiens	GSM2828172	GEO	SRA622650	8	2019	Kuppers	Ribosome protected RNA library from WTAP sgRNA HEL cells	WTAPribo_2	RFP	2	WT	chx			blood	HEL			TRUE		TESHOME	RFP_NA_2_NA_blood_HEL_WT_NA_NA_chx	FALSE	0.39043	0.0313524
PRJNA256316	SRR1528687					SRX663295		OTHER	other		SINGLE			ILLUMINA		SRP044937	PRJNA256316	26878238	256316	SRS668168	SAMN02943066			Homo sapiens	GSM1446874	GEO	SRA176910	2	2016	Loayza-Puch	Kidney normal tissue 1 RP	Kidney normal tissue 1 RP	RFP	2	WT	chx	1		kidney	NONE			TRUE		HÃ…KON	RFP_1_2_NA_kidney_NONE_WT_NA_NA_chx	FALSE	0.39043	0.0487268
PRJNA278009	SRR1910736					SRX952426		RNA-Seq	cDNA		SINGLE			ILLUMINA		SRP056098	PRJNA278009	26147685	278009	SRS872580	SAMN03401165			Homo sapiens	GSM1632599	GEO	SRA246404	6	2015	Su	human primary macrophages	IFNg RPF replicate 2	RFP	2	IFN	chx			blood	macrophage			TRUE		KORNEL	RFP_NA_2_NA_blood_macrophage_IFN_NA_NA_chx	FALSE	0.389538	0.0908637
PRJEB28810	ERR2812359					ERX2819190	human_testis_ribo_2_s	RNA-Seq	other		SINGLE			ILLUMINA		ERP111066	PRJEB28810		575406	ERS2758381	SAMEA4939598			Homo sapiens	SAMEA4939598	Lausanne Genomic Technologies Facility, Lausanne, Switzerland	ERA1612101	10	2019	Wang		E-MTAB-7247:human_testis_ribo_2	RFP	2		chx			testis	NONE			TRUE		PREETI	RFP_NA_2_NA_testis_NONE_NA_NA_NA_chx	FALSE	0.38929	0.11648
PRJNA740301	SRR14890802	18133986	1378182936	76	477	SRX11206955		OTHER	other	TRANSCRIPTOMIC	SINGLE	0	0	ILLUMINA	NextSeq 500	SRP325334	PRJNA740301	1		SRS9261337	SAMN19838086	simple	9606	Homo sapiens	GSM5397170	GEO	SRA1249860	6	2021	Makar	MB135iDUX4 myoblasts	MB135iDUX4-Ribo_04h_rep3	RFP	3				4h					TRUE		auto	RFP_NA_3_4h_NA_NA_NA_NA_NA_NA	FALSE	0.389083	0.0519587
PRJNA729461	SRR14510072	41915530	1046434086	24	450	SRX10855885		OTHER	other	TRANSCRIPTOMIC	SINGLE	0	0	ILLUMINA	Illumina NovaSeq 6000	SRP319472	PRJNA729461	34226921		SRS8951516	SAMN19116445	simple	9606	Homo sapiens	GSM5291916	GEO	SRA1231346	7	2021	Ichihara	HEK293T cells	eIF2D KO HEK293T #2 arsenite Ribo-seq replicate 1	RFP	1	KO				kidney	HEK293	eIF2D	auto_2782	TRUE		auto	RFP_NA_1_NA_kidney_HEK293_KO_eIF2D_auto_2782_NA	FALSE	0.388893	0.0687097
PRJNA664116	SRR12660872	66549287	2095256691	31	945	SRX9141924		OTHER	other	TRANSCRIPTOMIC	SINGLE	0	0	ILLUMINA	NextSeq 500	SRP282906	PRJNA664116	34615539		SRS7383236	SAMN16198231	simple	9606	Homo sapiens	GSM4793171	GEO	SRA1127134	8	2021	Gillen	HEK293 cells	Ribo-Seq siCNOT1 Replicate 1	RFP	1					kidney	HEK293			TRUE		auto	RFP_NA_1_NA_kidney_HEK293_NA_NA_NA_NA	FALSE	0.388694	0.287626
PRJNA272597	SRR1758396					SRX842646		RNA-Seq	cDNA		SINGLE			ILLUMINA		SRP052229	PRJNA272597	26729373	272597	SRS818820	SAMN03284306			Homo sapiens	GSM1585228	GEO	SRA231648	1	2016	Xu	Human fibroblast	11_mut d-leucine rep2 RPF	RFP	2	MUT	chx	2		fibroblast	NONE		dLeucine	TRUE		KORNEL	RFP_2_2_NA_fibroblast_NONE_MUT_NA_dLeucine_chx	FALSE	0.388692	0.0541557
PRJNA576650	SRR10251299					SRX6969305		RNA-Seq	cDNA		SINGLE			ILLUMINA		SRP224953	PRJNA576650	31971508	576650	SRS5494871	SAMN13000242			Homo sapiens	GSM4114793	GEO	SRA975934	1	2020	Wangen	Untreated ribosome profiling A	RPF_19_G418rep1_1_Untr_A	RFP	1		chx	1		kidney	HEK293		untreated	TRUE		PREETI	RFP_1_1_NA_kidney_HEK293_NA_NA_untreated_chx	FALSE	0.388278	0.196199
PRJNA542670	SRR9049074					SRX5825546		OTHER	other		SINGLE			ILLUMINA		SRP198270	PRJNA542670	31284728	542670	SRS4753600	SAMN11635154			Homo sapiens	GSM3763618	GEO	SRA885795	10	2019	Chothani	Left ventricle tissue of end-stage DCM patients	Left ventricle tissue of end-stage DCM patients (20PL01827)	RFP	23		chx			heart	NONE			TRUE		TESHOME	RFP_NA_23_NA_heart_NONE_NA_NA_NA_chx	FALSE	0.38818	0.0366132
PRJDB15060	DRR428607	10906452	545322600	50	259	DRX413782		OTHER	other	TRANSCRIPTOMIC	SINGLE	0	0	ILLUMINA	Illumina HiSeq 2500	DRP009580	PRJDB15060	1		DRS279345	SAMD00571142	simple	9606	Homo sapiens	SAMD00571142	KUMAMOTO	DRA015477	2	2023	Makar		K562 cells treated with CX5461, replicate 2	RFP	2	CX5461				bone	K562			TRUE		Michal	RFP_NA_2_NA_bone_K562_CX5461_NA_NA_NA	FALSE	0.388083	0.114082
PRJNA414611	SRR6181548					SRX3292091		OTHER	other		SINGLE			ILLUMINA		SRP120157	PRJNA414611	30591072	414611	SRS2601270	SAMN07795656			Homo sapiens	GSM2817682	GEO	SRA620345	4	2018	Murat	ATCC Cell Lines	RPF-sc-3	RFP	3		chx	2		ovary	HeLa		sc	TRUE		TESHOME	RFP_2_3_NA_ovary_HeLa_NA_NA_sc_chx	FALSE	0.387892	0.23364
PRJNA665035	SRR12693494					SRX9173292		OTHER	other		SINGLE			ILLUMINA		SRP284977	PRJNA665035	32995776	665035	SRS7410870	SAMN16238714			Homo sapiens	GSM4798521	GEO	SRA1129972	10	2020	Rao	HEK293	NSP1-HEK-3_ribo	RFP	3	OE	chx			kidney	HEK293	NSP1		TRUE		PREETI	RFP_NA_3_NA_kidney_HEK293_OE_NSP1_NA_chx	FALSE	0.387066	0.167638
PRJNA478455	SRR7451194					SRX4321694	D17-4823	OTHER	RT-PCR		SINGLE			ILLUMINA		SRP151602	PRJNA478455	30466063	478455	SRS3484161	SAMN09516440			Homo sapiens	RE60-1	MASSACHUSETTS INSTITUTE OF TECHNOLOGY	SRA730597	6	2018	Rothenberg		RFP_EGF_60_min_Rep_1	RFP	1		chx		60m	breast	MCF10A		EGF	TRUE		TESHOME	RFP_NA_1_60m_breast_MCF10A_NA_NA_EGF_chx	FALSE	0.386811	0.844157
PRJNA275386	SRR1803146					SRX876723		OTHER	other		SINGLE			ILLUMINA		SRP055009	PRJNA275386	26297486	275386	SRS845425	SAMN03344057			Homo sapiens	GSM1609377	GEO	SRA241011	2	2015	Cenik	EBV-transformed lymphoblastoid cells	GM10847_Rep1	RFP	1		chx			bone	LCL		GM10847	TRUE		KORNEL	RFP_NA_1_NA_bone_LCL_NA_NA_GM10847_chx	FALSE	0.38642	0.0446536
PRJNA129385	SRR057516					SRX021968	GSM546922: Footprint_miR-155_32hr_runs1-2	RNA-Seq	cDNA		SINGLE			ILLUMINA		SRP002605	PRJNA129385	20703300	129385	SRS079387	SAMN00014832			Homo sapiens	GSM546922	GEO	SRA020150	8	2010	Guo	HeLa	Footprint_miR-155_32hr_runs1-2	RFP	1	mir155	chx		32h	ovary	HeLa			TRUE		HÃ…KON	RFP_NA_1_32h_ovary_HeLa_mir155_NA_NA_chx	FALSE	0.386261	0.171125
PRJNA509149	SRR8309249					SRX5123179		OTHER	other		SINGLE			ILLUMINA		SRP173217	PRJNA509149	30626644	509149	SRS4136494	SAMN10564057			Homo sapiens	GSM3506281	GEO	SRA822679	12	2018	Walczak	Membrane fraction from UFSP2-KO HEK293 cells	ufsp2_memb_a	RFP	1	ufsp2	chx			kidney	HEK293		memb	TRUE		TESHOME	RFP_NA_1_NA_kidney_HEK293_ufsp2_NA_memb_chx	FALSE	0.386003	0.0143438
PRJNA729461	SRR14510057	34698419	847450374	24	370	SRX10855870		OTHER	other	TRANSCRIPTOMIC	SINGLE	0	0	ILLUMINA	Illumina NovaSeq 6000	SRP319472	PRJNA729461	34226921		SRS8951501	SAMN19116419	simple	9606	Homo sapiens	GSM5291901	GEO	SRA1231346	7	2021	Ichihara	HEK293T cells	WT HEK293T arsenite Ribo-seq replicate 2	RFP	2	WT				kidney	HEK293			TRUE		auto	RFP_NA_2_NA_kidney_HEK293_WT_NA_NA_NA	FALSE	0.385815	0.0605774
PRJNA756018	SRR15513160	50307263	1766973759	35	713	SRX11811954		RNA-Seq	cDNA	TRANSCRIPTOMIC	SINGLE	0	0	ILLUMINA	NextSeq 500	SRP333128	PRJNA756018	35841888		SRS9826472	SAMN20849945	simple	9606	Homo sapiens	GSM5527685	GEO	SRA1280330	7	2022	Chothani	untreated normal human fat tissue	Fat_2 (RiboSeq)	RFP	1								auto_2981	TRUE		auto	RFP_NA_1_NA_NA_NA_NA_NA_auto_2981_NA	FALSE	0.385422	0.0821669
PRJNA720951	SRR14200572	43452706	1685423062	38	680	SRX10567362		OTHER	other	TRANSCRIPTOMIC	SINGLE	0	0	ILLUMINA	Illumina HiSeq 4000	SRP314256	PRJNA720951	34166567		SRS8673639	SAMN18687194	simple	9606	Homo sapiens	GSM5234105	GEO	SRA1217043	4	2021	Sofiadis	Normal lung fibroblasts IMR90	Pro_rep2_rpf	RFP	2					lung				TRUE		auto	RFP_NA_2_NA_lung_NA_NA_NA_NA_NA	FALSE	0.385364	0.0407361
PRJNA472015	SRR7182547					SRX4099346		OTHER	other		SINGLE			ILLUMINA		SRP148422	PRJNA472015	30673779	472015	SRS3315531	SAMN09223527			Homo sapiens	GSM3146276	GEO	SRA706809	5	2018	Machkovech	A549 cells	ribosome footprints_cyclo_ifn	RFP			chx			lung	A549		ifn	TRUE		TESHOME	RFP_NA_NA_NA_lung_A549_NA_NA_ifn_chx	FALSE	0.385087	0.0543274
PRJEB33244	ERR3403494					ERX3427244	W2RPF_s	RNA-Seq	size fractionation		SINGLE			ILLUMINA		ERP116020	PRJEB33244		706227	ERS3547462	SAMEA5744175			Homo sapiens	E-MTAB-8100:W2RPF	Earlham Institute	ERA2022066	3	2021	Lezina	non-small cell lung carcinoma	W2RPF	RFP	2	KO_rescue	chx	2		lung	H1299	p53		TRUE		PREETI	RFP_2_2_NA_lung_H1299_KO_rescue_p53_NA_chx	FALSE	0.385085	0.391901
PRJNA599422	SRR10846537					SRX7517158		OTHER	other		SINGLE			ILLUMINA		SRP239882	PRJNA599422		599422	SRS5956824	SAMN13750410			Homo sapiens	GSM4255700	GEO	SRA1021798	8	2020	Ouspenskaia	Hmel	Hmel_rep1	RFP	3		chx	1		breast	Hmel			TRUE		PREETI	RFP_1_3_NA_breast_Hmel_NA_NA_NA_chx	FALSE	0.384056	0.0655571
PRJNA818335	SRR18402615	145443324	7272166200	50	2122	SRX14536498	GSM5964231	OTHER	other	TRANSCRIPTOMIC	SINGLE	0	0	ILLUMINA	Illumina NovaSeq 6000	SRP365126	PRJNA818335	36653366		SRS12333596	SAMN26855352	simple	9606	Homo sapiens	GSM5964231	Adrian Whitehouse, Faculty of Biological Sciences, University of Leeds	SRA1390089	12	2022	Murphy	TREx BCBL1-Rta	Repeat 2: BUD23 targetting shRNA - ribosome footprint RNA	RFP	1								auto_3361	TRUE		auto	RFP_NA_1_NA_NA_NA_NA_NA_auto_3361_NA	FALSE	0.383603	0.0647456
PRJNA521751	SRR8558080					SRX5359740		OTHER	other		SINGLE			ILLUMINA		SRP185496	PRJNA521751	31619139	521751	SRS4350374	SAMN10910522			Homo sapiens	GSM3597562	GEO	SRA848188	10	2019	Aliouat	colon cancer cell line	RIBOSEQ-WT-1	RFP	1	WT	chx			colon	HTC116			TRUE		TESHOME	RFP_NA_1_NA_colon_HTC116_WT_NA_NA_chx	FALSE	0.382525	0.811462
PRJNA795419	SRR17481808	39177933	1958896650	50	561	SRX13652318	GSM5776306	OTHER	other	TRANSCRIPTOMIC	SINGLE	0	0	ILLUMINA	Illumina NovaSeq 6000	SRP353938	PRJNA795419	1		SRS11538497	SAMN24719591	simple	9606	Homo sapiens	GSM5776306	school of medicine, sysu	SRA1353741	2	2023	Makar	HeLa cell	control Ribo-seq	RFP	1	WT				ovary	HeLa			TRUE		auto	RFP_NA_1_NA_ovary_HeLa_WT_NA_NA_NA	FALSE	0.382507	0.120902
PRJNA314507	SRR3208905					SRX1617588		RNA-Seq	cDNA		SINGLE			ILLUMINA		SRP071235	PRJNA314507	27655340	314507	SRS1326972	SAMN04536322			Homo sapiens	GSM2082557	GEO	SRA379362	7	2016	Grabole	TSC2-/- cells (number 19) treated with AZD-8055, RPF	Ribosome protected fragments (RPF) of TSC2-/- cells (number 19) treated with AZD-8055, Biological Replicate 1	RFP	1	m_m	chx	19		skin	TSC2		AZD	TRUE		KORNEL	RFP_19_1_NA_skin_TSC2_m_m_NA_AZD_chx	FALSE	0.381885	0.190078
PRJNA630716	SRR12216748					SRX8727227		RNA-Seq	cDNA		SINGLE			ILLUMINA		SRP260279	PRJNA630716	32906143	630716	SRS7001893	SAMN15526211			Homo sapiens	GSM4670762	GEO	SRA1072683	9	2020	Finkel	Calu 3 cells, ATCC HTB-55	fp_chx_07hr_1	RFP	1		chx		7h	lung	Calu3			TRUE		PREETI	RFP_NA_1_7h_lung_Calu3_NA_NA_NA_chx	FALSE	0.381841	0.22294
PRJNA316618	SRR3306584	242256008	12355056408	51	8063	SRX1667365		OTHER	other	TRANSCRIPTOMIC	SINGLE	0	0	ILLUMINA	Illumina HiSeq 2000	SRP072459	PRJNA316618	27153541		SRS1365641	SAMN04588784	simple	9606	Homo sapiens	GSM2100597	GEO	SRA399402	4	2016	Park	HeLa	S phase ribosome profiling replicate 2	RFP	2					ovary	HeLa			TRUE		auto	RFP_NA_2_NA_ovary_HeLa_NA_NA_NA_NA	FALSE	0.381756	1.51835
PRJNA414611	SRR6181561					SRX3292095		OTHER	other		SINGLE			ILLUMINA		SRP120157	PRJNA414611	30591072	414611	SRS2601274	SAMN07795664			Homo sapiens	GSM2817686	GEO	SRA620345	4	2018	Murat	ATCC Cell Lines	RPF-DHX36-3	RFP	3		chx	1		ovary	HeLa		DHX36	TRUE		TESHOME	RFP_1_3_NA_ovary_HeLa_NA_NA_DHX36_chx	FALSE	0.381693	0.224882
PRJNA533132	SRR8915507	44228026	3361329976	76	1141	SRX5696961		OTHER	other	TRANSCRIPTOMIC	SINGLE	0	0	ILLUMINA	NextSeq 500	SRP192770	PRJNA533132	1		SRS4636169	SAMN11440431	simple	9606	Homo sapiens	GSM3724994	GEO	SRA875251	8	2022	Makar	ribosome profiling	LogPhase_monosome_rep.1	RFP	1									TRUE		auto	RFP_NA_1_NA_NA_NA_NA_NA_NA_NA	FALSE	0.381423	0.0250288
PRJNA472636	SRR7207258					SRX4116243		OTHER	other		SINGLE			ILLUMINA		SRP148767	PRJNA472636	30089253	472636	SRS3331531	SAMN09238884			Homo sapiens	GSM3150271	GEO	SRA709715	7	2018	Gameiro	Breast epithelial cell	TAM_Ctrl_30min.2	RFP	2	WT	chx		30m	breast	MCF10A		TAM	TRUE		TESHOME	RFP_NA_2_30m_breast_MCF10A_WT_NA_TAM_chx	FALSE	0.381286	0.0692716
PRJNA212323	SRR935449					SRX323405		OTHER	other		SINGLE			ILLUMINA		SRP027514	PRJNA212323	24301020	212323	SRS459812	SAMN02252761			Homo sapiens	GSM1187135	GEO	SRA093551	10	2013	Rooijers	Foreskin fibroblast	BJ_RP_rep2	RFP	2		chx			skin	BJ			TRUE		HÃ…KON	RFP_NA_2_NA_skin_BJ_NA_NA_NA_chx	FALSE	0.381215	0.0800502
PRJNA448763	SRR6939924					SRX3884275		OTHER	other		SINGLE			ILLUMINA		SRP137150	PRJNA448763	31281537	448763	SRS3123547	SAMN08864564			Homo sapiens	GSM3081736	GEO	SRA681490	6	2019	Zou	normal_RPF	LC001_normal_RPF	RFP	1		chx			liver	NONE		normal	TRUE		TESHOME	RFP_NA_1_NA_liver_NONE_NA_NA_normal_chx	FALSE	0.380789	0.358914
PRJNA533074	SRR8907200					SRX5693021		OTHER	other		SINGLE			ILLUMINA		SRP192707	PRJNA533074	31167946	533074	SRS4632507	SAMN11433227			Homo sapiens	GSM3723765	GEO	SRA874614	5	2019	Holmes	Human Foreskin Fibroblasts and RH Toxoplasma	Riboseq_subconfluentHFF-RH_rep1	RFP	1		chx		24h	skin	SCRC1041		infe	TRUE		TESHOME	RFP_NA_1_24h_skin_SCRC1041_NA_NA_infe_chx	FALSE	0.38069	0.0315762
PRJNA589466	SRR10441364					SRX7136110		RNA-Seq	cDNA		SINGLE			ILLUMINA		SRP229759	PRJNA589466	32821933	589466	SRS5645028	SAMN13281631			Homo sapiens	GSM4160132	GEO	SRA995632	8	2020	Patel	Empty vector control	Empty vector control rep 1 [Ribo-seq]	RFP	1	WT	chx			kidney	HEK293			TRUE		PREETI	RFP_NA_1_NA_kidney_HEK293_WT_NA_NA_chx	FALSE	0.380316	0.931455
PRJNA414611	SRR6181538					SRX3292088		OTHER	other		SINGLE			ILLUMINA		SRP120157	PRJNA414611	30591072	414611	SRS2601267	SAMN07795659			Homo sapiens	GSM2817679	GEO	SRA620345	4	2018	Murat	ATCC Cell Lines	RPF-NT-1	RFP	1		chx	1		ovary	HeLa		NT	TRUE		TESHOME	RFP_1_1_NA_ovary_HeLa_NA_NA_NT_chx	FALSE	0.379971	0.152814
PRJNA129385	SRR057532					SRX021976	GSM546930: Footprint_miR-1_12hr_run1	RNA-Seq	cDNA		SINGLE			ILLUMINA		SRP002605	PRJNA129385	20703300	129385	SRS079395	SAMN00014840			Homo sapiens	GSM546930	GEO	SRA020150	8	2010	Guo	HeLa	Footprint_miR-1_12hr_run1	RFP	1	mir1	chx		12h	ovary	HeLa			TRUE		HÃ…KON	RFP_NA_1_12h_ovary_HeLa_mir1_NA_NA_chx	FALSE	0.379805	0.0620609
PRJNA809587	SRR18113904	24537112	3680566800	150	1323	SRX14264283	GSM5911787	OTHER	other	TRANSCRIPTOMIC	SINGLE	0	0	ILLUMINA	Illumina NovaSeq 6000	SRP361145	PRJNA809587	36074823		SRS12083243	SAMN26199036	simple	9606	Homo sapiens	GSM5911787	Wei Xie, School of Life Sciences, Tsinghua University	SRA1376840	10	2022	Zou	Preimplantation embryo	h_2cell_2PN_21_Ribo_rep1	RFP	2									TRUE		auto	RFP_NA_2_NA_NA_NA_NA_NA_NA_NA	FALSE	0.379664	0.0303627
PRJNA634332	SRR11825717					SRX8376267	2R2	RNA-Seq	PCR		SINGLE			ILLUMINA		SRP262616	PRJNA634332	30920299	634332	SRS6691033	SAMN14988436			Homo sapiens	2R_S6_L002_R1_001	FOOD AND DRUG ADMINISTRATION	SRA1078014	5	2020	Hettiarachchi	primary Hepatocytes	2R2	RFP	2		frozen		30min	liver	hepato			TRUE		PREETI	RFP_NA_2_30min_liver_hepato_NA_NA_NA_frozen	FALSE	0.379113	0.0266071
PRJNA477831	SRR7883752					SRX4721983		OTHER	other		SINGLE			ILLUMINA		SRP151279	PRJNA477831	30590705	477831	SRS3807068	SAMN10097084			Homo sapiens	GSM3396994	GEO	SRA728057	3	2019	Liu	iPSC	qc_sample_ipsc5_low_rnase	RFP	5	low	chx			embryonic	iPSC			TRUE		TESHOME	RFP_NA_5_NA_embryonic_iPSC_low_NA_NA_chx	FALSE	0.378882	0.0243807
PRJNA256318	SRR1528661					SRX663275		OTHER	other		SINGLE			ILLUMINA		SRP044935	PRJNA256318	28274951	256318	SRS668148	SAMN02943076			Homo sapiens	GSM1446854	GEO	SRA176906	7	2017	Loayza-Puch	MCF10A siCtrl batch4 RP	MCF10A siCtrl batch4 RP	RFP	2	WT	chx	4		breast	MCF10A			TRUE		HÃ…KON	RFP_4_2_NA_breast_MCF10A_WT_NA_NA_chx	FALSE	0.378882	0.104263
PRJEB23298	ERR2189764					ERX2245879	EV-A71_5hpi.rep1_s	OTHER	other		SINGLE			ILLUMINA		ERP105038	PRJEB23298		497718	ERS1992216	SAMEA104367238			Homo sapiens	SAMEA104367238	Dr. Valeria Lulla	ERA1125282	10	2018	Dinan		E-MTAB-6180:EV-A71_5hpi.rep1	RFP	1	A71	chx		5h	muscle	RD			TRUE		TESHOME	RFP_NA_1_5h_muscle_RD_A71_NA_NA_chx	FALSE	0.378704	0.0841749
PRJNA499096	SRR8130831					SRX4951960	RPF_2	OTHER	other		SINGLE			ILLUMINA		SRP167154	PRJNA499096	32699630	499096	SRS3993628	SAMN10343283			Homo sapiens	MKL1 N200	INSTITUT PASTEUR DE MONTEVIDEO	SRA800308	11	2019	Fernandez-Calero	MKL1		RFP	2	MKL1	chx			breast	MCF7			TRUE		TESHOME	RFP_NA_2_NA_breast_MCF7_MKL1_NA_NA_chx	FALSE	0.378249	0.0178202
PRJNA727298	SRR14421804					SRX10773162		OTHER	other		SINGLE			ILLUMINA		SRP318452	PRJNA727298	34107246	727298	SRS8861637	SAMN19014971			Homo sapiens	GSM5281837	GEO	SRA1228234	6	2021	Wu	HEK293 cells	HEK293 si-Control DMSO rep2	RFP	2	WT	chx			kidney	HEK293		dmso	TRUE		PREETI	RFP_NA_2_NA_kidney_HEK293_WT_NA_dmso_chx	FALSE	0.3774	0.0749987
PRJNA532643	SRR8891623					SRX5676970		OTHER	other		SINGLE			ILLUMINA		SRP192442	PRJNA532643	32522993	532643	SRS4618346	SAMN11408164			Homo sapiens	GSM3721661	GEO	SRA873611	4	2020	Reich	LN308 cell line	LN308-untreated-GCCAAT-R2 (Ribo-Seq)	RFP	2	WT	chx		0h	brain	LN308		Ctrl	TRUE		TESHOME	RFP_NA_2_0h_brain_LN308_WT_NA_Ctrl_chx	FALSE	0.377228	0.276494
PRJNA532643	SRR8891624					SRX5676971		OTHER	other		SINGLE			ILLUMINA		SRP192442	PRJNA532643	32522993	532643	SRS4618348	SAMN11408163			Homo sapiens	GSM3721662	GEO	SRA873611	4	2020	Reich	LN308 cell line	LN308-untreated-GCCAAT-R3 (Ribo-Seq)	RFP	3	WT	chx		0h	brain	LN308		Ctrl	TRUE		TESHOME	RFP_NA_3_0h_brain_LN308_WT_NA_Ctrl_chx	FALSE	0.376794	0.401218
PRJNA324409	SRR3623938	43031308	2194596708	51	1544	SRX1818909		OTHER	other	TRANSCRIPTOMIC	SINGLE	0	0	ILLUMINA	Illumina HiSeq 2000	SRP076102	PRJNA324409	27525483		SRS1482792	SAMN05202123	simple	9606	Homo sapiens	GSM2186924	GEO	SRA430681	8	2016	Bercovich-Kinori	ribosome profiling_4h	fp_chx_4hr_s4	RFP	1		chx		4h				auto_864	TRUE		auto	RFP_NA_1_4h_NA_NA_NA_NA_auto_864_chx	FALSE	0.376602	0.123345
PRJNA707431	SRR13884561	90034705	2881284405	32	1307	SRX10264954		OTHER	other	TRANSCRIPTOMIC	SINGLE	0	0	ILLUMINA	Illumina NovaSeq 6000	SRP309704	PRJNA707431	35137207		SRS8398584	SAMN18205168	simple	9606	Homo sapiens	GSM5140284	GEO	SRA1203922	7	2021	Luan	Cell line:A549	siNC_21.Riboseq	RFP	1					lung	A549		auto_2693	TRUE		auto	RFP_NA_1_NA_lung_A549_NA_NA_auto_2693_NA	FALSE	0.375736	1.13799
PRJNA729461	SRR14510081	40422424	972992194	24	424	SRX10855894		OTHER	other	TRANSCRIPTOMIC	SINGLE	0	0	ILLUMINA	Illumina NovaSeq 6000	SRP319472	PRJNA729461	34226921		SRS8951525	SAMN19116436	simple	9606	Homo sapiens	GSM5291925	GEO	SRA1231346	7	2021	Ichihara	HEK293T cells	eIF2A, eIF2D DKO HEK293T #2 arsenite Ribo-seq replicate 2	RFP	2	KO				kidney	HEK293	eIF2A, eIF2D D	auto_2787	TRUE		auto	RFP_NA_2_NA_kidney_HEK293_KO_eIF2A, eIF2D D_auto_2787_NA	FALSE	0.375478	0.0841852
PRJNA541324	SRR9019689	21627638	1103009538	51	734	SRX5797785		RNA-Seq	cDNA	TRANSCRIPTOMIC	SINGLE	0	0	ILLUMINA	Illumina HiSeq 2000	SRP195632	PRJNA541324	31944153		SRS4728929	SAMN11582999	simple	9606	Homo sapiens	GSM3753507	GEO	SRA883373	1	2020	Lyabin	Human embryonic kidney	Ribo-Seq wt+HA (RP_wt_HA), run 2	RFP	2					kidney				TRUE		auto	RFP_NA_2_NA_kidney_NA_NA_NA_NA_NA	FALSE	0.375343	0.118837
PRJNA854905	SRR19918526	19255080	962754000	50	468	SRX15961068	GSM6284789	OTHER	other	TRANSCRIPTOMIC	SINGLE	0	0	ILLUMINA	Illumina HiSeq 2500	SRP384536	PRJNA854905	35891396		SRS13647410	SAMN29472419	simple	9606	Homo sapiens	GSM6284789	Kamini Singh, Molecular Pharmacology, Albert Einstein College of Medicine	SRA1447869	7	2022	Singh	primary hNPC	B3_ribo	RFP	8					throat	NPC		auto_3473	TRUE		auto	RFP_NA_8_NA_throat_NPC_NA_NA_auto_3473_NA	FALSE	0.375048	0.127113
PRJNA707431	SRR13884567	94747637	3021448774	31	1913	SRX10264960		OTHER	other	TRANSCRIPTOMIC	SINGLE	0	0	ILLUMINA	Illumina NovaSeq 6000	SRP309704	PRJNA707431	35137207		SRS8398591	SAMN18205163	simple	9606	Homo sapiens	GSM5140290	GEO	SRA1203922	7	2021	Luan	Cell line:A549	siNC9.Riboseq	RFP	1					lung	A549		auto_2699	TRUE		auto	RFP_NA_1_NA_lung_A549_NA_NA_auto_2699_NA	FALSE	0.373836	0.490037
PRJNA707431	SRR13884519	54249841	1690123789	31	1256	SRX10264796		OTHER	other	TRANSCRIPTOMIC	SINGLE	0	0	ILLUMINA	Illumina NovaSeq 6000	SRP309704	PRJNA707431	35137207		SRS8398422	SAMN18205344	simple	9606	Homo sapiens	GSM5140242	GEO	SRA1203922	7	2021	Luan	Cell line:A549	siL9.Riboseq	RFP	1					lung	A549		auto_2605	TRUE		auto	RFP_NA_1_NA_lung_A549_NA_NA_auto_2605_NA	FALSE	0.373557	0.287924
PRJNA414611	SRR6181569					SRX3292097		OTHER	other		SINGLE			ILLUMINA		SRP120157	PRJNA414611	30591072	414611	SRS2601276	SAMN07795676			Homo sapiens	GSM2817688	GEO	SRA620345	4	2018	Murat	ATCC Cell Lines	RPF_DHX9_2	RFP	2		chx	2		ovary	HeLa		DHX9	TRUE		TESHOME	RFP_2_2_NA_ovary_HeLa_NA_NA_DHX9_chx	FALSE	0.373246	0.601801
PRJNA398679	SRR5943477					SRX3101967		OTHER	other		SINGLE			ILLUMINA		SRP115659	PRJNA398679	28981728	398679	SRS2437903	SAMN07515389			Homo sapiens	GSM2746370	GEO	SRA600071	8	2017	Tang	Human Embryonic Kidney Cells	Ribo-Seq (eIF5&5MP,HEK293)	RFP			chx			kidney	HEK293		eIF5_MP5	TRUE		HÃ…KON	RFP_NA_NA_NA_kidney_HEK293_NA_NA_eIF5_MP5_chx	FALSE	0.372921	0.0340835
PRJNA414611	SRR6181570					SRX3292097		OTHER	other		SINGLE			ILLUMINA		SRP120157	PRJNA414611	30591072	414611	SRS2601276	SAMN07795676			Homo sapiens	GSM2817688	GEO	SRA620345	4	2018	Murat	ATCC Cell Lines	RPF_DHX9_2	RFP	2		chx	3		ovary	HeLa		DHX9	TRUE		TESHOME	RFP_3_2_NA_ovary_HeLa_NA_NA_DHX9_chx	FALSE	0.372914	0.510219
PRJNA854905	SRR19918491	13409320	670466000	50	330	SRX15961072	GSM6284788	OTHER	other	TRANSCRIPTOMIC	SINGLE	0	0	ILLUMINA	Illumina HiSeq 2500	SRP384536	PRJNA854905	35891396		SRS13647414	SAMN29472420	simple	9606	Homo sapiens	GSM6284788	Kamini Singh, Molecular Pharmacology, Albert Einstein College of Medicine	SRA1447869	7	2022	Singh	primary hNPC	A3_ribo	RFP	5					throat	NPC		auto_3478	TRUE		auto	RFP_NA_5_NA_throat_NPC_NA_NA_auto_3478_NA	FALSE	0.372744	0.0582391
PRJNA406823	SRR6026775	4043631	110337154	27	26	SRX3177233		RNA-Seq	cDNA	TRANSCRIPTOMIC	SINGLE	0	0	ILLUMINA	NextSeq 500	SRP117282	PRJNA406823	30257221		SRS2506901	SAMN07629905	simple	9606	Homo sapiens	GSM2779671	GEO	SRA607220	1	2018	Woo	HEK293 cells	DMSO_Riboseq_rep3	RFP	3					kidney	HEK293		dmso	TRUE		auto	RFP_NA_3_NA_kidney_HEK293_NA_NA_dmso_NA	FALSE	0.372276	0.0746438
PRJNA533074	SRR8907202					SRX5693023		OTHER	other		SINGLE			ILLUMINA		SRP192707	PRJNA533074	31167946	533074	SRS4632508	SAMN11433223			Homo sapiens	GSM3723767	GEO	SRA874614	5	2019	Holmes	Human Foreskin Fibroblasts and RH Toxoplasma	Riboseq_subconfluentHFF-RH_rep3	RFP	3		chx		24h	skin	SCRC1041		infe	TRUE		TESHOME	RFP_NA_3_24h_skin_SCRC1041_NA_NA_infe_chx	FALSE	0.372276	0.0507168
PRJNA540298	SRR11626660	62020417	3101020850	50	1189	SRX8190764		OTHER	other	TRANSCRIPTOMIC	SINGLE	0	0	ILLUMINA	Illumina HiSeq 2500	SRP194188	PRJNA540298	34244513		SRS6549554	SAMN14755285	simple	9606	Homo sapiens	GSM4504144	GEO	SRA880706	3	2021	Lim	Prostate cancer tissue	Lucap 81 Tumor sample, Ribosome bound RNA, replicate2	RFP	2					prostate			auto_1356	TRUE		auto	RFP_NA_2_NA_prostate_NA_NA_NA_auto_1356_NA	FALSE	0.372195	0.462362
PRJNA238879	SRR1173907					SRX474111		RNA-Seq	cDNA		SINGLE			ILLUMINA		SRP038695	PRJNA238879	25621764	238879	SRS560101	SAMN02646676			Homo sapiens	GSM1331344	GEO	SRA141675	1	2015	Andreev	Hek293T	Arsenite riboseq, replicate 1	RFP	1	arsenite	chx	1		kidney	HEK293			TRUE		HÃ…KON	RFP_1_1_NA_kidney_HEK293_arsenite_NA_NA_chx	FALSE	0.370958	0.023884
PRJNA599943	SRR10850875					SRX7521418		RNA-Seq	cDNA		SINGLE			ILLUMINA		SRP240357	PRJNA599943	32807779	599943	SRS5961026	SAMN13762537			Homo sapiens	GSM4256669	GEO	SRA1022253	6	2020	Karousis	ABCE1 KD 02 - riboseq	AK2_M (L7)	RFP	2	KD	frozen			ovary	HeLa		L7	TRUE		PREETI	RFP_NA_2_NA_ovary_HeLa_KD_NA_L7_frozen	FALSE	0.370696	0.0494659
PRJNA740301	SRR14890806	19953228	1516445328	76	521	SRX11206959		OTHER	other	TRANSCRIPTOMIC	SINGLE	0	0	ILLUMINA	NextSeq 500	SRP325334	PRJNA740301	1		SRS9261341	SAMN19838082	simple	9606	Homo sapiens	GSM5397174	GEO	SRA1249860	6	2021	Makar	MB135iDUX4 myoblasts	MB135iDUX4-Ribo_14h_rep1	RFP	1									TRUE		auto	RFP_NA_1_NA_NA_NA_NA_NA_NA_NA	FALSE	0.370613	0.0242894
PRJNA316125	SRR3286543					SRX1657158		RNA-Seq	cDNA		SINGLE			ILLUMINA		SRP072231	PRJNA316125	31340039	316125	SRS1357385	SAMN04576208			Homo sapiens	GSM2097522	GEO	SRA393427	7	2019	Lu	HBE	HBE cells ribosome profiling	RFP	1		chx			lung	HBE			TRUE		KORNEL	RFP_NA_1_NA_lung_HBE_NA_NA_NA_chx	FALSE	0.37033	0.122099
PRJNA414611	SRR6181545					SRX3292090		OTHER	other		SINGLE			ILLUMINA		SRP120157	PRJNA414611	30591072	414611	SRS2601269	SAMN07795657			Homo sapiens	GSM2817681	GEO	SRA620345	4	2018	Murat	ATCC Cell Lines	RPF_sc_2	RFP	2		chx	4		ovary	HeLa		sc	TRUE		TESHOME	RFP_4_2_NA_ovary_HeLa_NA_NA_sc_chx	FALSE	0.370141	0.200739
PRJNA453915	SRR7073153					SRX4003601		RNA-Seq	cDNA		SINGLE			ILLUMINA		SRP143452	PRJNA453915	30029003	453915	SRS3225403	SAMN08993016			Homo sapiens	GSM3118960	GEO	SRA696853	7	2018	Darnell	HEK293T cells, ATCC CRL-3216	293t_leu_6h	RFP			chx		6h	kidney	HEK293		leu	TRUE		TESHOME	RFP_NA_NA_6h_kidney_HEK293_NA_NA_leu_chx	FALSE	0.368715	0.0876927
PRJNA591625	SRR10530121					SRX7214133		OTHER	other		SINGLE			ILLUMINA		SRP233222	PRJNA591625	33330931	591625	SRS5716936	SAMN13385781			Homo sapiens	GSM4192108	GEO	SRA1002630	11	2020	Selmi	human embryonic stem cells	H9.KO2.2.1_Ribo-seq	RFP	1	KO	chx	2		embryonic	H9		2	TRUE		PREETI	RFP_2_1_NA_embryonic_H9_KO_NA_2_chx	FALSE	0.368011	0.034772
PRJNA806946	SRR18017752	25445851	905530774	35	349	SRX14171963	GSM5899105	RNA-Seq	cDNA	TRANSCRIPTOMIC	SINGLE	0	0	ILLUMINA	NextSeq 2000	SRP359785	PRJNA806946	36433934		SRS11995926	SAMN25941497	simple	9606	Homo sapiens	GSM5899105	van Heesch, Princess Maxima Center	SRA1372962	12	2022	Palomar-Siles	epithelial	Ribo-Seq H1299-EVG418-5	RFP	1								auto_3306	TRUE		auto	RFP_NA_1_NA_NA_NA_NA_NA_auto_3306_NA	FALSE	0.367989	0.139065
PRJNA854905	SRR19918541	25764301	1288215050	50	620	SRX15961066	GSM6284786	OTHER	other	TRANSCRIPTOMIC	SINGLE	0	0	ILLUMINA	Illumina HiSeq 2500	SRP384536	PRJNA854905	35891396		SRS13647408	SAMN29472422	simple	9606	Homo sapiens	GSM6284786	Kamini Singh, Molecular Pharmacology, Albert Einstein College of Medicine	SRA1447869	7	2022	Singh	primary hNPC	A2_ribo	RFP	5					throat	NPC		auto_3454	TRUE		auto	RFP_NA_5_NA_throat_NPC_NA_NA_auto_3454_NA	FALSE	0.367591	0.0537086
PRJNA861947	SRR20613391	13592783	406348484	29	220	SRX16637177	GSM6381586	OTHER	other	TRANSCRIPTOMIC	SINGLE	0	0	ILLUMINA	Illumina HiSeq 2500	SRP387901	PRJNA861947	1		SRS14271738	SAMN29933664	simple	9606	Homo sapiens	GSM6381586	Waseda University	SRA1462202	7	2022	Makar	293T	Ribo-seq miRNA inhibitors_2	RFP	1					kidney	HEK293		auto_3488	TRUE		auto	RFP_NA_1_NA_kidney_HEK293_NA_NA_auto_3488_NA	FALSE	0.367143	0.118456
PRJNA353260	SRR5013257					SRX2343258	2199	RNA-Seq	cDNA		SINGLE			ILLUMINA		SRP093314	PRJNA353260	28003488	353260	SRS1795334	SAMN06013484			Homo sapiens	RPF mock 4h	SUN YAT-SEN UNIVERSITY	SRA492656	12	2016	Dai			RFP	1	WT	chx		4h	ovary	HeLa			TRUE		KORNEL	RFP_NA_1_4h_ovary_HeLa_WT_NA_NA_chx	FALSE	0.366932	3.68871
PRJNA666167	SRR12730634					SRX9203988		OTHER	other		SINGLE			ILLUMINA		SRP285644	PRJNA666167	33664453	666167	SRS7438921	SAMN16282460			Homo sapiens	GSM4805333	GEO	SRA1133793	4	2021	Reinsborough	MDA-MB-231 cell line	RiboProfiling-shBCDIN3D-RapPlus-Rep1	RFP	1	KD	chx			breast	MDA		BCDIN3D_Rapamycin	TRUE		PREETI	RFP_NA_1_NA_breast_MDA_KD_NA_BCDIN3D_Rapamycin_chx	FALSE	0.36692	0.0294588
PRJNA542670	SRR9049056					SRX5825528		OTHER	other		SINGLE			ILLUMINA		SRP198270	PRJNA542670	31284728	542670	SRS4753582	SAMN11635142			Homo sapiens	GSM3763600	GEO	SRA885795	10	2019	Chothani	Left ventricle tissue of end-stage DCM patients	Left ventricle tissue of end-stage DCM patients (20CT01836)	RFP	5		chx			heart	NONE			TRUE		TESHOME	RFP_NA_5_NA_heart_NONE_NA_NA_NA_chx	FALSE	0.366789	0.0420684
PRJNA548813	SRR9300367					SRX6069660		OTHER	other		SINGLE			ILLUMINA		SRP201395	PRJNA548813	31340047	548813	SRS4971935	SAMN12056127			Homo sapiens	GSM3890769	GEO	SRA899165	7	2019	Chang	HEK293T	Wild-type replicate 2 for Ribo-seq	RFP	2	WT	chx			kidney	HEK293			TRUE		TESHOME	RFP_NA_2_NA_kidney_HEK293_WT_NA_NA_chx	FALSE	0.366748	0.200033
GSE208041	SRR20106155	178403458	6276999801	35	2065	SRX16141488	GSM6333426	OTHER	other	TRANSCRIPTOMIC	SINGLE	0	0	ILLUMINA	Illumina NovaSeq 6000	SRP386079	PRJNA858047	36284713		SRS13803513	SAMN29660993	simple	9606	Homo sapiens	GSM6333426	AG Uhlenhaut, Institute for Diabetes and Endocrinology (IDE), Helmholz Zentrum MÃ¼nchen	SRA1453914	10	2022	Ansari	THP-1	THP-1 cells, Riboseq/LPSDex, 3h, rep4	RFP	4				3h	blood	THP1		LPSDex	TRUE		Michal	RFP_NA_4_3h_blood_THP1_NA_NA_LPSDex_NA	FALSE	0.366441	1.43456
PRJNA163111	SRR493748					SRX145830	GSM926675: HEK293 medium	OTHER	other		SINGLE			ILLUMINA		SRP012648	PRJNA163111	22836135	163111	SRS312026	SAMN00990791			Homo sapiens	GSM926675	GEO	SRA052308	7	2012	Ingolia	HEK293 medium	HEK293 medium	RFP		medium	chx			kidney	HEK293			TRUE		HÃ…KON	RFP_NA_NA_NA_kidney_HEK293_medium_NA_NA_chx	FALSE	0.366368	0.11242
PRJNA257365	SRR1535548					SRX668712		RNA-Seq	cDNA		SINGLE			ILLUMINA		SRP045214	PRJNA257365	25989971	257365	SRS673075	SAMN02950962			Homo sapiens	GSM1464105	GEO	SRA177782	7	2015	Rutkowski	Ribosome profiling	RP 6 h p.i. - Rep 2	RFP	3		chx	2	6h	skin	NONE			TRUE		HÃ…KON	RFP_2_3_6h_skin_NONE_NA_NA_NA_chx	FALSE	0.366152	0.0984616
PRJNA278390	SRR1916547					SRX957356		RNA-Seq	cDNA		SINGLE			ILLUMINA		SRP056200	PRJNA278390	26538417	278390	SRS874706	SAMN03418229			Homo sapiens	GSM1634448	GEO	SRA246838	11	2015	Elkon	U2OS, Myc activation (36 hr)	Myc.rp.rep2.lane2	RFP	2	treated	chx	2		bone	U2OS		Myc	TRUE		KORNEL	RFP_2_2_NA_bone_U2OS_treated_NA_Myc_chx	FALSE	0.3661	0.0602557
PRJNA707431	SRR13884556	70701693	2227616448	31	1195	SRX10264893		OTHER	other	TRANSCRIPTOMIC	SINGLE	0	0	ILLUMINA	Illumina NovaSeq 6000	SRP309704	PRJNA707431	35137207		SRS8398521	SAMN18205173	simple	9606	Homo sapiens	GSM5140279	GEO	SRA1203922	7	2021	Luan	Cell line:A549	siL41.Riboseq	RFP	1					lung	A549		auto_2650	TRUE		auto	RFP_NA_1_NA_lung_A549_NA_NA_auto_2650_NA	FALSE	0.364792	0.126621
PRJNA599943	SRR10850866					SRX7521409		RNA-Seq	cDNA		SINGLE			ILLUMINA		SRP240357	PRJNA599943	32807779	599943	SRS5961017	SAMN13762553			Homo sapiens	GSM4256660	GEO	SRA1022253	6	2020	Karousis	CTRL KD 02 - riboseq	SK2_M (L6)	RFP	2	WT	frozen			ovary	HeLa		L6	TRUE		PREETI	RFP_NA_2_NA_ovary_HeLa_WT_NA_L6_frozen	FALSE	0.364638	0.20775
PRJNA129385	SRR057517					SRX021968	GSM546922: Footprint_miR-155_32hr_runs1-2	RNA-Seq	cDNA		SINGLE			ILLUMINA		SRP002605	PRJNA129385	20703300	129385	SRS079387	SAMN00014832			Homo sapiens	GSM546922	GEO	SRA020150	8	2010	Guo	HeLa	Footprint_miR-155_32hr_runs1-2	RFP	2	mir155	chx		32h	ovary	HeLa			TRUE		HÃ…KON	RFP_NA_2_32h_ovary_HeLa_mir155_NA_NA_chx	FALSE	0.364591	0.2725
PRJNA272597	SRR1758410					SRX842660		RNA-Seq	cDNA		SINGLE			ILLUMINA		SRP052229	PRJNA272597	26729373	272597	SRS818834	SAMN03284283			Homo sapiens	GSM1585242	GEO	SRA231648	1	2016	Xu	Human fibroblast	9_mut d-leucine rep3 RPF	RFP	3	MUT	chx	1		fibroblast	NONE		dLeucine	TRUE		KORNEL	RFP_1_3_NA_fibroblast_NONE_MUT_NA_dLeucine_chx	FALSE	0.364268	0.154779
PRJNA256317	SRR1528683					SRX663292		OTHER	other		SINGLE			ILLUMINA		SRP044936	PRJNA256317	28274951	256317	SRS668165	SAMN02943063			Homo sapiens	GSM1446871	GEO	SRA176907	7	2017	Loayza-Puch	U2OS myc batch7 RP	U2OS myc batch7 RP	RFP	2	myc	chx	7		bone	U2OS			TRUE		HÃ…KON	RFP_7_2_NA_bone_U2OS_myc_NA_NA_chx	FALSE	0.363931	0.192894
PRJNA453915	SRR7073130					SRX4003578		RNA-Seq	cDNA		SINGLE			ILLUMINA		SRP143452	PRJNA453915	30029003	453915	SRS3225380	SAMN08993045			Homo sapiens	GSM3118937	GEO	SRA696853	7	2018	Darnell	HeLa cells, ATCC CCL-2	hela_rich_mono_3h	RFP			chx		3h	ovary	HeLa		rich_mono	TRUE		TESHOME	RFP_NA_NA_3h_ovary_HeLa_NA_NA_rich_mono_chx	FALSE	0.363512	0.400389
PRJNA701951	SRR13712432	14556675	742390425	51	247	SRX10101208		RNA-Seq	cDNA	TRANSCRIPTOMIC	SINGLE	0	0	ILLUMINA	NextSeq 500	SRP306464	PRJNA701951	35388737		SRS8258240	SAMN17918135	simple	9606	Homo sapiens	GSM5082446	GEO	SRA1196414	4	2022	Hisaoka	HCT116	TP53-KO_Ctrl_RPF_rep2	RFP	2	KO				colon	HCT116	TP53-		TRUE		auto	RFP_NA_2_NA_colon_HCT116_KO_TP53-_NA_NA	FALSE	0.363308	0.0358684
PRJNA448763	SRR6939942					SRX3884294		OTHER	other		SINGLE			ILLUMINA		SRP137150	PRJNA448763	31281537	448763	SRS3123566	SAMN08864572			Homo sapiens	GSM3081754	GEO	SRA681490	6	2019	Zou	tumor_RPF	LC502_tumor_RPF	RFP	5		chx			liver	NONE		tumor	TRUE		TESHOME	RFP_NA_5_NA_liver_NONE_NA_NA_tumor_chx	FALSE	0.363075	0.15979
PRJNA316618	SRR3306586	239897608	12234778008	51	7928	SRX1667367		OTHER	other	TRANSCRIPTOMIC	SINGLE	0	0	ILLUMINA	Illumina HiSeq 2000	SRP072459	PRJNA316618	27153541		SRS1365639	SAMN04588786	simple	9606	Homo sapiens	GSM2100599	GEO	SRA399402	4	2016	Park	HeLa	M phase ribosome profiling replicate 2	RFP	2					ovary	HeLa		auto_837	TRUE		auto	RFP_NA_2_NA_ovary_HeLa_NA_NA_auto_837_NA	FALSE	0.362919	0.989388
PRJNA600267	SRR10859273	50309690	2515484500	50	1256	SRX7529370		OTHER	other	TRANSCRIPTOMIC	SINGLE	0	0	ILLUMINA	Illumina HiSeq 2500	SRP240955	PRJNA600267	35953468		SRS5968655	SAMN13810471	simple	9606	Homo sapiens	GSM4258236	GEO	SRA1023076	6	2022	Jungfleisch	whole cell	ER non-infected RPF, replicate 2	RFP	2				auto15				ER	TRUE		auto	RFP_NA_2_auto15_NA_NA_NA_NA_ER_NA	FALSE	0.362811	0.0149863
PRJNA415033	SRR6191039	45958493	1310419942	28	1334	SRX3301066		OTHER	other	TRANSCRIPTOMIC	SINGLE	0	0	ILLUMINA	Illumina HiSeq 3000	SRP120504	PRJNA415033	31160600		SRS2612411	SAMN07814394	simple	9606	Homo sapiens	GSM2824216	GEO	SRA621248	7	2019	Sauer	HEK293 cells	Wildtype Riboseq 3	RFP	3					kidney	HEK293			TRUE		auto	RFP_NA_3_NA_kidney_HEK293_NA_NA_NA_NA	FALSE	0.361748	0.119303
PRJNA871214	SRR21146246	111711842	8378388150	75	2297	SRX17157959	GSM6481500	OTHER	other	TRANSCRIPTOMIC	SINGLE	0	0	ILLUMINA	Illumina NovaSeq 6000	SRP393125	PRJNA871214	36306790		SRS14729647	SAMN30410514	simple	9606	Homo sapiens	GSM6481500	Guangzhou Laboratory	SRA1479839	11	2022	Weng	Human AML cell MonoMac6	MM6, shNS, ribo, rep1	RFP	1	infected				blood	MM6		shNS	TRUE		Hakon	RFP_NA_1_NA_blood_MM6_infected_NA_shNS_NA	FALSE	0.361148	0.0680062
PRJNA937159	SRR23563663	92797251	4639862550	50	2430	SRX19450598	GSM7054180	OTHER	other	TRANSCRIPTOMIC	SINGLE	0	0	ILLUMINA	Illumina HiSeq 2000	SRP423678	PRJNA937159	1		SRS16843372	SAMN33391480	simple	9606	Homo sapiens	GSM7054180	Kamini Singh, Molecular Pharmacology, Albert Einstein College of Medicine	SRA1593440	2	2023	Makar	PANC-1	PANC1 RAPA-2 RF	RFP	2	Rapamycin				pancreas	PANC1			TRUE		Michal	RFP_NA_2_NA_pancreas_PANC1_Rapamycin_NA_NA_NA	FALSE	0.36103	0.0205449
PRJNA540298	SRR11626655	71872112	3593605600	50	1458	SRX8190759		OTHER	other	TRANSCRIPTOMIC	SINGLE	0	0	ILLUMINA	Illumina HiSeq 2500	SRP194188	PRJNA540298	34244513		SRS6549549	SAMN14755290	simple	9606	Homo sapiens	GSM4504139	GEO	SRA880706	3	2021	Lim	Prostate cancer tissue	Lucap 78 Tumor sample, Ribosome bound RNA, replicate1	RFP	1					prostate				TRUE		auto	RFP_NA_1_NA_prostate_NA_NA_NA_NA_NA	FALSE	0.360982	0.184537
PRJNA714824	SRR13976756	108612707	5539248057	51	1866	SRX10354415		RNA-Seq	cDNA	TRANSCRIPTOMIC	SINGLE	0	0	ILLUMINA	NextSeq 550	SRP310845	PRJNA714824	34871442		SRS8472701	SAMN18318633	simple	9606	Homo sapiens	GSM5173413	GEO	SRA1206835	12	2021	Bohlen	HeLa Cells	Total ribosome fooprints from HeLa cells	RFP	1					ovary	HeLa		auto_2702	TRUE		auto	RFP_NA_1_NA_ovary_HeLa_NA_NA_auto_2702_NA	FALSE	0.360625	0.684866
PRJNA756018	SRR15513202	19284194	679627869	35	301	SRX11811996		RNA-Seq	cDNA	TRANSCRIPTOMIC	SINGLE	0	0	ILLUMINA	NextSeq 500	SRP333128	PRJNA756018	35841888		SRS9826515	SAMN20849896	simple	9606	Homo sapiens	GSM5527727	GEO	SRA1280330	7	2022	Chothani	untreated human aortic endothelial cells	HA_EC_6 (RiboSeq)	RFP	1								auto_3023	TRUE		auto	RFP_NA_1_NA_NA_NA_NA_NA_auto_3023_NA	FALSE	0.360427	0.0297091
PRJNA707431	SRR13884523	95481497	2988515523	31	1268	SRX10264884		OTHER	other	TRANSCRIPTOMIC	SINGLE	0	0	ILLUMINA	Illumina NovaSeq 6000	SRP309704	PRJNA707431	35137207		SRS8398511	SAMN18205337	simple	9606	Homo sapiens	GSM5140246	GEO	SRA1203922	7	2021	Luan	Cell line:A549	siL12.Riboseq	RFP	1					lung	A549		auto_2641	TRUE		auto	RFP_NA_1_NA_lung_A549_NA_NA_auto_2641_NA	FALSE	0.360414	0.291692
PRJNA707431	SRR13884551	91895451	2937326475	31	1248	SRX10264852		OTHER	other	TRANSCRIPTOMIC	SINGLE	0	0	ILLUMINA	Illumina NovaSeq 6000	SRP309704	PRJNA707431	35137207		SRS8398480	SAMN18205152	simple	9606	Homo sapiens	GSM5140274	GEO	SRA1203922	7	2021	Luan	Cell line:A549	siL36A.Riboseq	RFP	1					lung	A549		auto_2629	TRUE		auto	RFP_NA_1_NA_lung_A549_NA_NA_auto_2629_NA	FALSE	0.360312	0.696068
PRJNA667952	SRR12790141	36569410	1791901090	49	1142	SRX9259296		OTHER	other	TRANSCRIPTOMIC	SINGLE	0	0	ILLUMINA	Illumina HiSeq 2500	SRP286677	PRJNA667952	33597240		SRS7490389	SAMN16392792	simple	9606	Homo sapiens	GSM4822827	GEO	SRA1140064	12	2020	Dong	Human embryonic kidney cells	Ribo_seq_shScram_rep2	RFP	2					kidney			auto_2400	TRUE		auto	RFP_NA_2_NA_kidney_NA_NA_NA_auto_2400_NA	FALSE	0.359104	0.125085
PRJNA528026	SRR8752386					SRX5543312		RNA-Seq	cDNA		SINGLE			ILLUMINA		SRP188848	PRJNA528026	32040547	528026	SRS4508982	SAMN11166404			Homo sapiens	GSM3679625	GEO	SRA862154	2	2020	Haneke	RPEI cells	FP_DMSO_2	RFP	2		chx			eye	RPEI		dmso	TRUE		TESHOME	RFP_NA_2_NA_eye_RPEI_NA_NA_dmso_chx	FALSE	0.358966	0.0872856
PRJDB15060	DRR428605	10297020	514851000	50	246	DRX413780		OTHER	other	TRANSCRIPTOMIC	SINGLE	0	0	ILLUMINA	Illumina HiSeq 2500	DRP009580	PRJDB15060	1		DRS279343	SAMD00571140	simple	9606	Homo sapiens	SAMD00571140	KUMAMOTO	DRA015477	2	2023	Makar		K562 cells treated with DMSO, replicate 2	RFP	2	DMSO				bone	K562			TRUE		Michal	RFP_NA_2_NA_bone_K562_DMSO_NA_NA_NA	FALSE	0.358843	0.0517814
PRJNA453915	SRR7073138					SRX4003586		RNA-Seq	cDNA		SINGLE			ILLUMINA		SRP143452	PRJNA453915	30029003	453915	SRS3225388	SAMN08993031			Homo sapiens	GSM3118945	GEO	SRA696853	7	2018	Darnell	HEK293T cells, ATCC CRL-3216 + AAVS1:Flag-RagB-WT	293t_ragbwt_leu_3h	RFP		WT	chx		3h	kidney	HEK293		ragbwt_leu	TRUE		TESHOME	RFP_NA_NA_3h_kidney_HEK293_WT_NA_ragbwt_leu_chx	FALSE	0.357729	0.191966
PRJNA655835	SRR12407385	34552673	1245390716	36	867	SRX8905249		OTHER	other	TRANSCRIPTOMIC	SINGLE	0	0	ILLUMINA	Illumina HiSeq 3000	SRP276619	PRJNA655835	36473845		SRS7163073	SAMN15756317	simple	9606	Homo sapiens	GSM4713006	GEO	SRA1109746	11	2022	Weber	HEK293T	DAP5-2_Ribo: DAP5-null replicate 2 for Ribo-seq	RFP	2	KO				kidney	HEK293	DAP5		TRUE		Hakon	RFP_NA_2_NA_kidney_HEK293_KO_DAP5_NA_NA	FALSE	0.357721	0.368899
PRJNA756018	SRR15513156	85717131	3011980437	35	1233	SRX11811950		RNA-Seq	cDNA	TRANSCRIPTOMIC	SINGLE	0	0	ILLUMINA	NextSeq 500	SRP333128	PRJNA756018	35841888		SRS9826468	SAMN20849941	simple	9606	Homo sapiens	GSM5527681	GEO	SRA1280330	7	2022	Chothani	untreated human embryonic stem cells	ES_4 (RiboSeq)	RFP	1								auto_2977	TRUE		auto	RFP_NA_1_NA_NA_NA_NA_NA_auto_2977_NA	FALSE	0.357496	0.418505
PRJNA414611	SRR6181574					SRX3292098		OTHER	other		SINGLE			ILLUMINA		SRP120157	PRJNA414611	30591072	414611	SRS2601277	SAMN07795675			Homo sapiens	GSM2817689	GEO	SRA620345	4	2018	Murat	ATCC Cell Lines	RPF-DHX9-3	RFP	3		chx	2		ovary	HeLa		DHX9	TRUE		TESHOME	RFP_2_3_NA_ovary_HeLa_NA_NA_DHX9_chx	FALSE	0.357331	0.769268
PRJEB33244	ERR3403474					ERX3427234	C3RPF_s	RNA-Seq	size fractionation		SINGLE			ILLUMINA		ERP116020	PRJEB33244		706227	ERS3547452	SAMEA5744165			Homo sapiens	E-MTAB-8100:C3RPF	Earlham Institute	ERA2022066	3	2021	Lezina	non-small cell lung carcinoma	C3RPF	RFP	3	KO	chx	2		lung	H1299	p53		TRUE		PREETI	RFP_2_3_NA_lung_H1299_KO_p53_NA_chx	FALSE	0.356166	0.126611
PRJNA861947	SRR20613398	16919282	504399164	29	269	SRX16637170	GSM6381579	OTHER	other	TRANSCRIPTOMIC	SINGLE	0	0	ILLUMINA	Illumina HiSeq 2500	SRP387901	PRJNA861947	1		SRS14271732	SAMN29933671	simple	9606	Homo sapiens	GSM6381579	Waseda University	SRA1462202	7	2022	Makar	293T	Ribo-seq Scr1	RFP	1					kidney	HEK293			TRUE		auto	RFP_NA_1_NA_kidney_HEK293_NA_NA_NA_NA	FALSE	0.356077	0.11125
PRJNA755296	SRR15480788	47475015	1415398521	29	518	SRX11780885		OTHER	other	TRANSCRIPTOMIC	SINGLE	0	0	ILLUMINA	Illumina NovaSeq 6000	SRP332718	PRJNA755296	35869499		SRS9785569	SAMN20810602	simple	9606	Homo sapiens	GSM5520350	GEO	SRA1278709	8	2021	Chen	Control cells	Ribo-seq_C01	RFP	1									TRUE		auto	RFP_NA_1_NA_NA_NA_NA_NA_NA_NA	FALSE	0.354789	0.0169515
PRJNA272597	SRR1758407					SRX842657		RNA-Seq	cDNA		SINGLE			ILLUMINA		SRP052229	PRJNA272597	26729373	272597	SRS818831	SAMN03284287			Homo sapiens	GSM1585239	GEO	SRA231648	1	2016	Xu	Human fibroblast	6_corr l-leucine rep3 RPF	RFP	3	CORR	chx	1		fibroblast	NONE		lLeucine	TRUE		KORNEL	RFP_1_3_NA_fibroblast_NONE_CORR_NA_lLeucine_chx	FALSE	0.354399	0.646129
PRJNA532643	SRR8891632					SRX5676979		OTHER	other		SINGLE			ILLUMINA		SRP192442	PRJNA532643	32522993	532643	SRS4618356	SAMN11408177			Homo sapiens	GSM3721670	GEO	SRA873611	4	2020	Reich	LN308 cell line	LN308-6h-Thapsigargin-GCTCAT (Ribo-Seq)	RFP			chx		6h	brain	LN308		thaps	TRUE		TESHOME	RFP_NA_NA_6h_brain_LN308_NA_NA_thaps_chx	FALSE	0.354376	0.254221
PRJNA599422	SRR10846538					SRX7517159		OTHER	other		SINGLE			ILLUMINA		SRP239882	PRJNA599422		599422	SRS5956825	SAMN13750409			Homo sapiens	GSM4255701	GEO	SRA1021798	8	2020	Ouspenskaia	Hmel	Hmel_rep2	RFP	1		chx	2		breast	Hmel			TRUE		PREETI	RFP_2_1_NA_breast_Hmel_NA_NA_NA_chx	FALSE	0.353651	0.0992747
PRJNA774895	SRR16587388	60264346	2402942793	39	1013	SRX12788779	GSM5658199	OTHER	other	TRANSCRIPTOMIC	SINGLE	0	0	ILLUMINA	Illumina HiSeq 4000	SRP343302	PRJNA774895	1		SRS10734810	SAMN22590090	simple	9606	Homo sapiens	GSM5658199	Biochemistry and Biophysics, UCSF	SRA1322668	2	2023	Makar	breast cancer cell line	MDA-LM2_rpf_r1	RFP	1					breast	MDA		auto_3831	TRUE		auto	RFP_NA_1_NA_breast_MDA_NA_NA_auto_3831_NA	FALSE	0.353012	0.0643533
PRJNA244941	SRR1257237					SRX522469		OTHER	other		SINGLE			ILLUMINA		SRP041298	PRJNA244941	26338483	244941	SRS594824	SAMN02730059			Homo sapiens	GSM1371455	GEO	SRA158793	8	2015	Jang	U2-OS Cells	WT_ribo_profile_CT00_rep2	RFP	2	WT	chx			bone	U2OS		CT00	TRUE		HÃ…KON	RFP_NA_2_NA_bone_U2OS_WT_NA_CT00_chx	FALSE	0.35296	0.535062
PRJNA664116	SRR12660881	66720102	5070727752	76	1746	SRX9141933		OTHER	other	TRANSCRIPTOMIC	SINGLE	0	0	ILLUMINA	NextSeq 500	SRP282906	PRJNA664116	34615539		SRS7383245	SAMN16198222	simple	9606	Homo sapiens	GSM4793180	GEO	SRA1127134	8	2021	Gillen	HEK293 cells	Ribo-Seq RPF_Control_rep2	RFP	2	WT				kidney	HEK293			TRUE		auto	RFP_NA_2_NA_kidney_HEK293_WT_NA_NA_NA	FALSE	0.352673	0.70956
PRJNA515538	SRR8449577	64994325	3314710575	51	1190	SRX5256543		OTHER	other	TRANSCRIPTOMIC	SINGLE	0	0	ILLUMINA	Illumina HiSeq 2500	SRP179798	PRJNA515538	31819274		SRS4258049	SAMN10760872	simple	9606	Homo sapiens	GSM3566408	GEO	SRA835486	7	2019	Martinez	HeLa-S3 (Human Cervix Adenocarcinoma)	HeLa-S3_Ribo_HiRes_rep1	RFP	1					ovary	HeLa			TRUE		auto	RFP_NA_1_NA_ovary_HeLa_NA_NA_NA_NA	FALSE	0.35258	0.385152
PRJNA414611	SRR6181568					SRX3292097		OTHER	other		SINGLE			ILLUMINA		SRP120157	PRJNA414611	30591072	414611	SRS2601276	SAMN07795676			Homo sapiens	GSM2817688	GEO	SRA620345	4	2018	Murat	ATCC Cell Lines	RPF_DHX9_2	RFP	2		chx	1		ovary	HeLa		DHX9	TRUE		TESHOME	RFP_1_2_NA_ovary_HeLa_NA_NA_DHX9_chx	FALSE	0.352136	0.349219
GSE208041	SRR20106158	162014559	5712135165	35	1897	SRX16141485	GSM6333423	OTHER	other	TRANSCRIPTOMIC	SINGLE	0	0	ILLUMINA	Illumina NovaSeq 6000	SRP386079	PRJNA858047	36284713		SRS13803510	SAMN29660996	simple	9606	Homo sapiens	GSM6333423	AG Uhlenhaut, Institute for Diabetes and Endocrinology (IDE), Helmholz Zentrum MÃ¼nchen	SRA1453914	10	2022	Ansari	THP-1	THP-1 cells, Riboseq/LPSDex, 3h, rep1	RFP	1				3h	blood	THP1		LPSDex	TRUE		Michal	RFP_NA_1_3h_blood_THP1_NA_NA_LPSDex_NA	FALSE	0.351698	2.09985
PRJNA396698	SRR5886321	89601931	6809746756	76	2338	SRX3052238		OTHER	other	TRANSCRIPTOMIC	SINGLE	0	0	ILLUMINA	NextSeq 500	SRP114504	PRJNA396698	30449621		SRS2398666	SAMN07431143	simple	9606	Homo sapiens	GSM2724038	GEO	SRA595098	11	2018	Arango	HeLa cells, Ribosome Protected RNA	NAT10_KO_Ribo-seq_BioRep_1 (protected RNA)	RFP	2	KO				ovary	HeLa	NAT10_		TRUE		auto	RFP_NA_2_NA_ovary_HeLa_KO_NAT10__NA_NA	FALSE	0.349955	0.314254
PRJNA521751	SRR8558084					SRX5359744		OTHER	other		SINGLE			ILLUMINA		SRP185496	PRJNA521751	31619139	521751	SRS4350378	SAMN10910527			Homo sapiens	GSM3597566	GEO	SRA848188	10	2019	Aliouat	colon cancer cell line	RIBOSEQ-Upf1-KO-1	RFP	1	KO	chx			colon	HTC116		Upf1	TRUE		TESHOME	RFP_NA_1_NA_colon_HTC116_KO_NA_Upf1_chx	FALSE	0.349869	0.357491
GSE208041	SRR20106161	163268802	5764144838	35	1931	SRX16141482	GSM6333420	OTHER	other	TRANSCRIPTOMIC	SINGLE	0	0	ILLUMINA	Illumina NovaSeq 6000	SRP386079	PRJNA858047	36284713		SRS13803507	SAMN29660999	simple	9606	Homo sapiens	GSM6333420	AG Uhlenhaut, Institute for Diabetes and Endocrinology (IDE), Helmholz Zentrum MÃ¼nchen	SRA1453914	10	2022	Ansari	THP-1	THP-1 cells, Riboseq/LPS, 3h, rep3	RFP	3				3h	blood	THP1		LPS	TRUE		Michal	RFP_NA_3_3h_blood_THP1_NA_NA_LPS_NA	FALSE	0.349545	1.50597
PRJNA499096	SRR8130835					SRX4951956	RPF_6	OTHER	other		SINGLE			ILLUMINA		SRP167154	PRJNA499096	32699630	499096	SRS3993629	SAMN10343282			Homo sapiens	MCF7 control	INSTITUT PASTEUR DE MONTEVIDEO	SRA800308	11	2019	Fernandez-Calero	MCF7		RFP	6	WT	chx			breast	MCF7			TRUE		TESHOME	RFP_NA_6_NA_breast_MCF7_WT_NA_NA_chx	FALSE	0.349372	0.206272
PRJNA600267	SRR10859269	50805567	2540278350	50	1188	SRX7529366		OTHER	other	TRANSCRIPTOMIC	SINGLE	0	0	ILLUMINA	Illumina HiSeq 2500	SRP240955	PRJNA600267	35953468		SRS5968651	SAMN13810475	simple	9606	Homo sapiens	GSM4258232	GEO	SRA1023076	6	2022	Jungfleisch	whole cell	ER CHIKV-infected RPF, replicate 2	RFP	2								ER	TRUE		auto	RFP_NA_2_NA_NA_NA_NA_NA_ER_NA	FALSE	0.349268	0.132902
PRJNA521751	SRR8558083					SRX5359743		OTHER	other		SINGLE			ILLUMINA		SRP185496	PRJNA521751	31619139	521751	SRS4350377	SAMN10910528			Homo sapiens	GSM3597565	GEO	SRA848188	10	2019	Aliouat	colon cancer cell line	RIBOSEQ-eRF3-KO-2	RFP	2	KO	chx			colon	HTC116		eRF3	TRUE		TESHOME	RFP_NA_2_NA_colon_HTC116_KO_NA_eRF3_chx	FALSE	0.348799	0.478515
PRJNA532643	SRR8891629					SRX5676976		OTHER	other		SINGLE			ILLUMINA		SRP192442	PRJNA532643	32522993	532643	SRS4618352	SAMN11408158			Homo sapiens	GSM3721667	GEO	SRA873611	4	2020	Reich	LN308 cell line	LN308-6h-Tunicamycin-GAATGA-R2 (Ribo-Seq)	RFP	2		chx		6h	brain	LN308		Tuni	TRUE		TESHOME	RFP_NA_2_6h_brain_LN308_NA_NA_Tuni_chx	FALSE	0.348736	0.274163
PRJNA556704	SRR9839461					SRX6594278		OTHER	other		SINGLE			ILLUMINA		SRP216422	PRJNA556704	31791371	556704	SRS5159348	SAMN12365724			Homo sapiens	GSM3954921	GEO	SRA927081	10	2019	Wilczynska	HEK293 cells	RPF_Control_rep2	RFP	2	WT	chx			kidney	HEK293			TRUE		PREETI	RFP_NA_2_NA_kidney_HEK293_WT_NA_NA_chx	FALSE	0.34812	0.680291
PRJNA740301	SRR14890803	19492323	1481416548	76	516	SRX11206956		OTHER	other	TRANSCRIPTOMIC	SINGLE	0	0	ILLUMINA	NextSeq 500	SRP325334	PRJNA740301	1		SRS9261338	SAMN19838085	simple	9606	Homo sapiens	GSM5397171	GEO	SRA1249860	6	2021	Makar	MB135iDUX4 myoblasts	MB135iDUX4-Ribo_08h_rep1	RFP	1				8h					TRUE		auto	RFP_NA_1_8h_NA_NA_NA_NA_NA_NA	FALSE	0.348003	0.0651531
PRJNA740301	SRR14890804	62739718	4768218568	76	1680	SRX11206957		OTHER	other	TRANSCRIPTOMIC	SINGLE	0	0	ILLUMINA	NextSeq 500	SRP325334	PRJNA740301	1		SRS9261339	SAMN19838084	simple	9606	Homo sapiens	GSM5397172	GEO	SRA1249860	6	2021	Makar	MB135iDUX4 myoblasts	MB135iDUX4-Ribo_08h_rep2	RFP	2				8h					TRUE		auto	RFP_NA_2_8h_NA_NA_NA_NA_NA_NA	FALSE	0.348003	0.0144943
PRJNA723012	SRR14275238	32956496	1110753432	33	479	SRX10636532		OTHER	other	TRANSCRIPTOMIC	SINGLE	0	0	ILLUMINA	NextSeq 500	SRP315393	PRJNA723012	1		SRS8732448	SAMN18797404	simple	9606	Homo sapiens	GSM5253068	GEO	SRA1220379	4	2023	Makar	Xenograft Cell Line	RPF MDA CRISPRi eGFP OE Ile TAT R2	RFP	1								auto_2741	TRUE		auto	RFP_NA_1_NA_NA_NA_NA_NA_auto_2741_NA	FALSE	0.348003	0.00982829
PRJNA822939	SRR18592275	27983555	2378602175	85	806	SRX14720932	GSM6008621	OTHER	other	TRANSCRIPTOMIC	SINGLE	0	0	ILLUMINA	NextSeq 500	SRP367409	PRJNA822939	35858571		SRS12483092	SAMN27283812	simple	9606	Homo sapiens	GSM6008621	Department of Genetics and Genome Sciences, Case Western Reserve University	SRA1400321	4	2022	Krokowski	Corneal epithelial cells	1h 500 mOsm rep2 Ribosome profiling	RFP	2									TRUE		auto	RFP_NA_2_NA_NA_NA_NA_NA_NA_NA	FALSE	0.348003	0.0237638
PRJNA625261	SRR11542151					SRX8112249		OTHER	other		SINGLE			ILLUMINA		SRP256332	PRJNA625261	33296667	625261	SRS6477333	SAMN14596013			Homo sapiens	GSM4475946	GEO	SRA1065150	12	2020	Chen	Squamous Cell Carcinoma	520_RocA0.3um	RFP	1	0.3	chx			lung	NCIH520		Rocalgamide	TRUE		PREETI	RFP_NA_1_NA_lung_NCIH520_0.3_NA_Rocalgamide_chx	FALSE	0.348003	0.0118504
PRJNA523167	SRR8590759					SRX5391041		RNA-Seq	cDNA		SINGLE			ILLUMINA		SRP186252	PRJNA523167	31911279	523167	SRS4378982	SAMN10965475			Homo sapiens	GSM3611928	GEO	SRA850276	12	2019	Vaklavas	adult human female breast	HMECs Serum Deprived 24 hours ribosome protected fragments	RFP	2	deprived	chx		24h	breast	HMEC			TRUE		TESHOME	RFP_NA_2_24h_breast_HMEC_deprived_NA_NA_chx	FALSE	0.348003	0.00838256
PRJNA523167	SRR8590802					SRX5391060		RNA-Seq	cDNA		SINGLE			ILLUMINA		SRP186252	PRJNA523167	31911279	523167	SRS4379001	SAMN10965455			Homo sapiens	GSM3611947	GEO	SRA850276	12	2019	Vaklavas	Human triple negative breast cancer	SUM159PT Serum Deprived 24 hours ribosome protected fragments	RFP	1	deprived	chx		24h	breast	SUM159			TRUE		TESHOME	RFP_NA_1_24h_breast_SUM159_deprived_NA_NA_chx	FALSE	0.348003	0.00960932
PRJNA275305	SRR1802146					SRX876063		OTHER	other		SINGLE			ILLUMINA		SRP054971	PRJNA275305	26900662	275305	SRS844807	SAMN03342131			Homo sapiens	GSM1608285	GEO	SRA240809	11	2015	Ji	Fibroblast cell	EH_chx_rep1	RFP	1		chx			fibroblast	NONE		EH	TRUE		KORNEL	RFP_NA_1_NA_fibroblast_NONE_NA_NA_EH_chx	FALSE	0.348003	0.0545611
PRJNA523167	SRR8590766					SRX5391045		RNA-Seq	cDNA		SINGLE			ILLUMINA		SRP186252	PRJNA523167	31911279	523167	SRS4378986	SAMN10965470			Homo sapiens	GSM3611932	GEO	SRA850276	12	2019	Vaklavas	adult human female breast, fibrocystic disease	MCF10A Full Serum ribosome protected fragments	RFP	1	full	chx			breast	MCF10A			TRUE		TESHOME	RFP_NA_1_NA_breast_MCF10A_full_NA_NA_chx	FALSE	0.348003	0.0295639
PRJNA701894	SRR13711196	29643974	1808282414	61	728	SRX10100120		OTHER	other	TRANSCRIPTOMIC	SINGLE	0	0	ILLUMINA	Illumina HiSeq 2500	SRP306425	PRJNA701894	35857873		SRS8257258	SAMN17916071	simple	9606	Homo sapiens	GSM5082073	GEO	SRA1196361	7	2022	Sehrawat	HEK293T cells	i14G1-10_Ribo-seq_1	RFP	1					kidney	HEK293		auto_2549	TRUE		auto	RFP_NA_1_NA_kidney_HEK293_NA_NA_auto_2549_NA	FALSE	0.348003	0.0724219
PRJNA181016	SRR619089					SRX205666		RNA-Seq	size fractionation		SINGLE			ILLUMINA		SRP017263	PRJNA181016	23290916	181016	SRS376440	SAMN01816434			Homo sapiens	HEK293_DMSO	CORNELL	SRA061778	1	2013	Liu		HEK293_DMSO	RFP	2		chx			kidney	HEK293		dmso	TRUE		HÃ…KON	RFP_NA_2_NA_kidney_HEK293_NA_NA_dmso_chx	FALSE	0.348003	0.0379839
PRJNA406823	SRR6026774	2056196	56576564	27	13	SRX3177232		RNA-Seq	cDNA	TRANSCRIPTOMIC	SINGLE	0	0	ILLUMINA	NextSeq 500	SRP117282	PRJNA406823	30257221		SRS2506900	SAMN07629906	simple	9606	Homo sapiens	GSM2779670	GEO	SRA607220	1	2018	Woo	HEK293 cells	DMSO_Riboseq_rep2	RFP	2					kidney	HEK293		dmso	TRUE		auto	RFP_NA_2_NA_kidney_HEK293_NA_NA_dmso_NA	FALSE	0.348003	0.0361629
PRJNA406823	SRR6026779	1861626	51517593	27	13	SRX3177237		RNA-Seq	cDNA	TRANSCRIPTOMIC	SINGLE	0	0	ILLUMINA	NextSeq 500	SRP117282	PRJNA406823	30257221		SRS2506905	SAMN07629901	simple	9606	Homo sapiens	GSM2779675	GEO	SRA607220	1	2018	Woo	HEK293 cells	THAP_Riboseq_rep3	RFP	3					kidney	HEK293			TRUE		auto	RFP_NA_3_NA_kidney_HEK293_NA_NA_NA_NA	FALSE	0.348003	0.0346733
PRJNA287879	SRR2075928					SRX1070861		OTHER	other		SINGLE			ILLUMINA		SRP059825	PRJNA287879	27309803	287879	SRS969986	SAMN03788110			Homo sapiens	GSM1720806	GEO	SRA274158	6	2016	Iwasaki	HEK 293 T-Rex_ribo_RocA03	ribo_RocA03 [Sample 4]	RFP	1		chx			kidney	HEK293		RocA03	TRUE		KORNEL	RFP_NA_1_NA_kidney_HEK293_NA_NA_RocA03_chx	FALSE	0.348003	0.0123985
PRJNA576652	SRR10251306					SRX6969312		RNA-Seq	cDNA		SINGLE			ILLUMINA		SRP224955	PRJNA576652	31971508	576652	SRS5494878	SAMN13000235			Homo sapiens	GSM4114800	GEO	SRA975937	1	2020	Wangen	Untreated ribosome profiling A	RPF_26_G418rep3_1_Untr_A	RFP	3		chx	1		kidney	HEK293		untreated	TRUE		PREETI	RFP_1_3_NA_kidney_HEK293_NA_NA_untreated_chx	FALSE	0.348003	0.0202595
PRJNA515197	SRR8443311					SRX5250479		OTHER	other		SINGLE			ILLUMINA		SRP179458	PRJNA515197	31171704	515197	SRS4252127	SAMN10743993			Homo sapiens	GSM3562585	GEO	SRA834884	6	2019	Kearse	15 min-treated, HeLa cells	15 min-treated, replicate B footprints	RFP	2		chx		15m	ovary	HeLa			TRUE		TESHOME	RFP_NA_2_15m_ovary_HeLa_NA_NA_NA_chx	FALSE	0.348003	0.0170257
PRJNA285961	SRR2052917					SRX1050334		OTHER	other		SINGLE			ILLUMINA		SRP059187	PRJNA285961	29321322	285961	SRS954641	SAMN03763406			Homo sapiens	GSM1704509	GEO	SRA271639	9	2016	Reid	Huh7 cells	40 h infection cytosol ribosome profiling (Rep 1)	RFP	1	infected	chx		40hr	liver	Huh7		cyto	TRUE		KORNEL	RFP_NA_1_40hr_liver_Huh7_infected_NA_cyto_chx	FALSE	0.348003	0.0117693
PRJNA285961	SRR2052935					SRX1050352		OTHER	other		SINGLE			ILLUMINA		SRP059187	PRJNA285961	29321322	285961	SRS954621	SAMN03763426			Homo sapiens	GSM1704527	GEO	SRA271639	9	2016	Reid	Huh7 cells	6 h infection cytosol ribosome profiling (Rep 3)	RFP	3	infected	chx		6hr	liver	Huh7		cyto	TRUE		KORNEL	RFP_NA_3_6hr_liver_Huh7_infected_NA_cyto_chx	FALSE	0.348003	0.0121446
PRJNA667952	SRR12790153	31144095	1526060655	49	969	SRX9259308		OTHER	other	TRANSCRIPTOMIC	SINGLE	0	0	ILLUMINA	Illumina HiSeq 2500	SRP286677	PRJNA667952	33597240		SRS7490401	SAMN16392817	simple	9606	Homo sapiens	GSM4822839	GEO	SRA1140064	12	2020	Dong	Human embryonic kidney cells	Ribo_seq_shScram_rep3	RFP	3					kidney				TRUE		auto	RFP_NA_3_NA_kidney_NA_NA_NA_NA_NA	FALSE	0.348003	0.0428795
PRJNA275386	SRR1803195					SRX876772		OTHER	other		SINGLE			ILLUMINA		SRP055009	PRJNA275386	26297486	275386	SRS845375	SAMN03344000			Homo sapiens	GSM1609426	GEO	SRA241011	2	2015	Cenik	EBV-transformed lymphoblastoid cells	GM18507_Rep1	RFP	1		chx			bone	LCL		GM18507	TRUE		KORNEL	RFP_NA_1_NA_bone_LCL_NA_NA_GM18507_chx	FALSE	0.348003	0.0190776
PRJNA854905	SRR19918544	26186423	1309321150	50	634	SRX15961066	GSM6284786	OTHER	other	TRANSCRIPTOMIC	SINGLE	0	0	ILLUMINA	Illumina HiSeq 2500	SRP384536	PRJNA854905	35891396		SRS13647408	SAMN29472422	simple	9606	Homo sapiens	GSM6284786	Kamini Singh, Molecular Pharmacology, Albert Einstein College of Medicine	SRA1447869	7	2022	Singh	primary hNPC	A2_ribo	RFP	8					throat	NPC		auto_3457	TRUE		auto	RFP_NA_8_NA_throat_NPC_NA_NA_auto_3457_NA	FALSE	0.348003	0.0351052
PRJNA854905	SRR19918527	13442168	672108400	50	337	SRX15961067	GSM6284787	OTHER	other	TRANSCRIPTOMIC	SINGLE	0	0	ILLUMINA	Illumina HiSeq 2500	SRP384536	PRJNA854905	35891396		SRS13647409	SAMN29472421	simple	9606	Homo sapiens	GSM6284787	Kamini Singh, Molecular Pharmacology, Albert Einstein College of Medicine	SRA1447869	7	2022	Singh	primary hNPC	B2_ribo	RFP	1					throat	NPC		auto_3458	TRUE		auto	RFP_NA_1_NA_throat_NPC_NA_NA_auto_3458_NA	FALSE	0.348003	0.0165946
PRJNA854905	SRR19918530	13143775	657188750	50	331	SRX15961067	GSM6284787	OTHER	other	TRANSCRIPTOMIC	SINGLE	0	0	ILLUMINA	Illumina HiSeq 2500	SRP384536	PRJNA854905	35891396		SRS13647409	SAMN29472421	simple	9606	Homo sapiens	GSM6284787	Kamini Singh, Molecular Pharmacology, Albert Einstein College of Medicine	SRA1447869	7	2022	Singh	primary hNPC	B2_ribo	RFP	4					throat	NPC		auto_3461	TRUE		auto	RFP_NA_4_NA_throat_NPC_NA_NA_auto_3461_NA	FALSE	0.348003	0.0241698
PRJNA854905	SRR19918519	19309568	965478400	50	464	SRX15961068	GSM6284789	OTHER	other	TRANSCRIPTOMIC	SINGLE	0	0	ILLUMINA	Illumina HiSeq 2500	SRP384536	PRJNA854905	35891396		SRS13647410	SAMN29472419	simple	9606	Homo sapiens	GSM6284789	Kamini Singh, Molecular Pharmacology, Albert Einstein College of Medicine	SRA1447869	7	2022	Singh	primary hNPC	B3_ribo	RFP	1					throat	NPC		auto_3466	TRUE		auto	RFP_NA_1_NA_throat_NPC_NA_NA_auto_3466_NA	FALSE	0.348003	0.042958
PRJNA854905	SRR19918522	19130900	956545000	50	462	SRX15961068	GSM6284789	OTHER	other	TRANSCRIPTOMIC	SINGLE	0	0	ILLUMINA	Illumina HiSeq 2500	SRP384536	PRJNA854905	35891396		SRS13647410	SAMN29472419	simple	9606	Homo sapiens	GSM6284789	Kamini Singh, Molecular Pharmacology, Albert Einstein College of Medicine	SRA1447869	7	2022	Singh	primary hNPC	B3_ribo	RFP	4					throat	NPC		auto_3469	TRUE		auto	RFP_NA_4_NA_throat_NPC_NA_NA_auto_3469_NA	FALSE	0.348003	0.0378566
PRJNA854905	SRR19918556	16475473	823773650	50	418	SRX15961064	GSM6284784	OTHER	other	TRANSCRIPTOMIC	SINGLE	0	0	ILLUMINA	Illumina HiSeq 2500	SRP384536	PRJNA854905	35891396		SRS13647406	SAMN29472424	simple	9606	Homo sapiens	GSM6284784	Kamini Singh, Molecular Pharmacology, Albert Einstein College of Medicine	SRA1447869	7	2022	Singh	primary hNPC	A1_ribo	RFP	4					throat	NPC			TRUE		auto	RFP_NA_4_NA_throat_NPC_NA_NA_NA_NA	FALSE	0.348003	0.0119049
PRJNA854905	SRR19918559	16594031	829701550	50	420	SRX15961064	GSM6284784	OTHER	other	TRANSCRIPTOMIC	SINGLE	0	0	ILLUMINA	Illumina HiSeq 2500	SRP384536	PRJNA854905	35891396		SRS13647406	SAMN29472424	simple	9606	Homo sapiens	GSM6284784	Kamini Singh, Molecular Pharmacology, Albert Einstein College of Medicine	SRA1447869	7	2022	Singh	primary hNPC	A1_ribo	RFP	7					throat	NPC			TRUE		auto	RFP_NA_7_NA_throat_NPC_NA_NA_NA_NA	FALSE	0.348003	0.023739
PRJEB23298	ERR2189772					ERX2245887	PV1_4hpi.rep1_s	OTHER	other		SINGLE			ILLUMINA		ERP105038	PRJEB23298		497718	ERS1992224	SAMEA104367246			Homo sapiens	SAMEA104367246	Dr. Valeria Lulla	ERA1125282	10	2018	Dinan		E-MTAB-6180:PV1_4hpi.rep1	RFP	1	PV1	chx		4h	muscle	RD			TRUE		TESHOME	RFP_NA_1_4h_muscle_RD_PV1_NA_NA_chx	FALSE	0.348003	0.0100608
PRJNA152347	SRR403885					SRX118288	GSM869039: Footprint for rapamcyin treated PC3 cells, replicate #1.	RNA-Seq	cDNA		SINGLE			ILLUMINA		SRP010679	PRJNA152347	22367541	152347	SRS290857	SAMN00779920			Homo sapiens	GSM869039	GEO	SRA049772	2	2012	Hsieh	PC3 human prostate cancer cells	Footprint for rapamycin treated PC3 cells, replicate #1.	RFP	1	rapa	chx			prostate	PC3			TRUE		HÃ…KON	RFP_NA_1_NA_prostate_PC3_rapa_NA_NA_chx	FALSE	0.348003	0.0291966
PRJNA257365	SRR1535546					SRX668712		RNA-Seq	cDNA		SINGLE			ILLUMINA		SRP045214	PRJNA257365	25989971	257365	SRS673075	SAMN02950962			Homo sapiens	GSM1464105	GEO	SRA177782	7	2015	Rutkowski	Ribosome profiling	RP 6 h p.i. - Rep 2	RFP	1		chx	2	6h	skin	NONE			TRUE		HÃ…KON	RFP_2_1_6h_skin_NONE_NA_NA_NA_chx	FALSE	0.348003	0.130407
PRJEB30076	ERR2976736					ERX2979494	RPF_0h_n3_s	RNA-Seq	size fractionation		SINGLE			ILLUMINA		ERP112487	PRJEB30076	31300557	554433	ERS2955284	SAMEA5147538			Homo sapiens	SAMEA5147538	B.T. McDermott, University of Liverpool	ERA1674180	7	2019	McDermott	SW1353 chondrosarcoma cell line	E-MTAB-7466:RPF_0h_n3	RFP	3		chx		0h	cartilage	SW1353			TRUE		TESHOME	RFP_NA_3_0h_cartilage_SW1353_NA_NA_NA_chx	FALSE	0.348003	0.017113
PRJNA285961	SRR2052919					SRX1050336		OTHER	other		SINGLE			ILLUMINA		SRP059187	PRJNA285961	29321322	285961	SRS954639	SAMN03763408			Homo sapiens	GSM1704511	GEO	SRA271639	9	2016	Reid	Huh7 cells	Interferon treatment cytosol ribosome profiling (Rep 1)	RFP	1	treated	chx			liver	Huh7		cyto	TRUE		KORNEL	RFP_NA_1_NA_liver_Huh7_treated_NA_cyto_chx	FALSE	0.348003	0.0125209
PRJNA212323	SRR935455					SRX323411		OTHER	other		SINGLE			ILLUMINA		SRP027514	PRJNA212323	24301020	212323	SRS459818	SAMN02252769			Homo sapiens	GSM1187141	GEO	SRA093551	10	2013	Rooijers	Osteosarcoma	Cybrid_tRNA_Trp_5556GA_RP_rep2	RFP	2	Trp	chx			bone	cybrid			TRUE		HÃ…KON	RFP_NA_2_NA_bone_cybrid_Trp_NA_NA_chx	FALSE	0.348003	0.00701638
PRJNA593553	SRR11569083					SRX8138014		OTHER	other		SINGLE			ILLUMINA		SRP234715	PRJNA593553	32610081	593553	SRS6501160	SAMN14640548			Homo sapiens	GSM4485599	GEO	SRA1006582	8	2020	Wu	HelaUV	HelaUV2	RFP	2	UV	chx			ovary	HeLa			TRUE		PREETI	RFP_NA_2_NA_ovary_HeLa_UV_NA_NA_chx	FALSE	0.348003	0.0150537
PRJNA551033	SRR9602035					SRX6367325		OTHER	other		SINGLE			ILLUMINA		SRP212089	PRJNA551033	31396629	551033	SRS5028750	SAMN12137829			Homo sapiens	GSM3905622	GEO	SRA914270	8	2019	Gopalakrishna	Human Embryonic Kidney_Flp-Inâ„¢ 293 T-REx	C6orf203 wild-type cells	RFP	1	WT	chx			kidney	HEK293		mito	TRUE		TESHOME	RFP_NA_1_NA_kidney_HEK293_WT_NA_mito_chx	FALSE	0.348003	0.0127292
PRJNA289569	SRR2096967					SRX1092015		OTHER	other		SINGLE			ILLUMINA		SRP060676	PRJNA289569	27058758	289569	SRS987646	SAMN03855829			Homo sapiens	GSM1819220	GEO	SRA276791	4	2016	Oh	HEK293	Rluc control ribosome profiling with sodium arsenite rep1	RFP	1	WT	chx			kidney	HEK293		sodium arsenite	TRUE		KORNEL	RFP_NA_1_NA_kidney_HEK293_WT_NA_sodium arsenite_chx	FALSE	0.348003	0.0208521
PRJNA548784	SRR9295891					SRX6065271		OTHER	other		SINGLE			ILLUMINA		SRP201361	PRJNA548784	32094190	548784	SRS4966420	SAMN12050147			Homo sapiens	GSM3889079	GEO	SRA898897	2	2020	Philippe	HEK-293T	35YW: hek293_torin_RPF_rep1	RFP	1	WT	chx	1		kidney	HEK293		torin	TRUE		TESHOME	RFP_1_1_NA_kidney_HEK293_WT_NA_torin_chx	FALSE	0.348003	0.0252233
PRJNA599422	SRR10846533					SRX7517156		OTHER	other		SINGLE			ILLUMINA		SRP239882	PRJNA599422		599422	SRS5956822	SAMN13750412			Homo sapiens	GSM4255698	GEO	SRA1021798	8	2020	Ouspenskaia	HCT116	HCT116_CHX+	RFP			chx			colon	HCT116		p	TRUE		PREETI	RFP_NA_NA_NA_colon_HCT116_NA_NA_p_chx	FALSE	0.347829	0.449216
PRJNA453915	SRR7073123					SRX4003571		RNA-Seq	cDNA		SINGLE			ILLUMINA		SRP143452	PRJNA453915	30029003	453915	SRS3225405	SAMN08993038			Homo sapiens	GSM3118930	GEO	SRA696853	7	2018	Darnell	HEK293T cells, ATCC CRL-3216	293t_rpC_leu_3h	RFP			chx		3h	kidney	HEK293		rpC_leu	TRUE		TESHOME	RFP_NA_NA_3h_kidney_HEK293_NA_NA_rpC_leu_chx	FALSE	0.347801	0.225254
PRJNA541324	SRR9019696	19022702	970157802	51	658	SRX5797792		RNA-Seq	cDNA	TRANSCRIPTOMIC	SINGLE	0	0	ILLUMINA	Illumina HiSeq 2000	SRP195632	PRJNA541324	31944153		SRS4728936	SAMN11582992	simple	9606	Homo sapiens	GSM3753514	GEO	SRA883373	1	2020	Lyabin	Human embryonic kidney	Ribo-Seq deltaYB-1 (RP_del), run 1	RFP	1					kidney			auto_1365	TRUE		auto	RFP_NA_1_NA_kidney_NA_NA_NA_auto_1365_NA	FALSE	0.346781	0.0971485
PRJNA414611	SRR6181541					SRX3292089		OTHER	other		SINGLE			ILLUMINA		SRP120157	PRJNA414611	30591072	414611	SRS2601268	SAMN07795658			Homo sapiens	GSM2817680	GEO	SRA620345	4	2018	Murat	ATCC Cell Lines	RPF-NT-2	RFP	2		chx	2		ovary	HeLa		NT	TRUE		TESHOME	RFP_2_2_NA_ovary_HeLa_NA_NA_NT_chx	FALSE	0.346746	0.306815
PRJNA599943	SRR10850871					SRX7521414		RNA-Seq	cDNA		SINGLE			ILLUMINA		SRP240357	PRJNA599943	32807779	599943	SRS5961022	SAMN13762542			Homo sapiens	GSM4256665	GEO	SRA1022253	6	2020	Karousis	CTRL KD 01 - riboseq	SK1_M (L7)	RFP	1	WT	frozen			ovary	HeLa		L7	TRUE		PREETI	RFP_NA_1_NA_ovary_HeLa_WT_NA_L7_frozen	FALSE	0.34648	0.152393
PRJNA369756	SRR6327777					SRX3427420		OTHER	other		SINGLE			ILLUMINA		SRP098797	PRJNA369756	29170441	369756	SRS2718885	SAMN08106045			Homo sapiens	GSM2867900	GEO	SRA535328	1	2018	Zhang	HEK293 cells	HEK293 Harr	RFP	1	WT	harr			kidney	HEK293			TRUE		KORNEL	RFP_NA_1_NA_kidney_HEK293_WT_NA_NA_harr	FALSE	0.345576	0.181783
PRJNA415033	SRR6191041	53423144	1526048491	28	1553	SRX3301068		OTHER	other	TRANSCRIPTOMIC	SINGLE	0	0	ILLUMINA	Illumina HiSeq 3000	SRP120504	PRJNA415033	31160600		SRS2612414	SAMN07814392	simple	9606	Homo sapiens	GSM2824218	GEO	SRA621248	7	2019	Sauer	DHX36-KO-HEK293	DHX36-KO Riboseq 2	RFP	2	KO				kidney	HEK293	DHX36-		TRUE		auto	RFP_NA_2_NA_kidney_HEK293_KO_DHX36-_NA_NA	FALSE	0.345567	0.531437
PRJNA806946	SRR18017756	32164341	1160103328	36	451	SRX14171959	GSM5899101	RNA-Seq	cDNA	TRANSCRIPTOMIC	SINGLE	0	0	ILLUMINA	NextSeq 2000	SRP359785	PRJNA806946	36433934		SRS11995922	SAMN25941501	simple	9606	Homo sapiens	GSM5899101	van Heesch, Princess Maxima Center	SRA1372962	12	2022	Palomar-Siles	epithelial	Ribo-Seq H1299-EV-5	RFP	1								auto_3302	TRUE		auto	RFP_NA_1_NA_NA_NA_NA_NA_auto_3302_NA	FALSE	0.34519	0.107288
PRJNA707431	SRR13884579	68735516	2062701339	30	664	SRX10264864		OTHER	other	TRANSCRIPTOMIC	SINGLE	0	0	ILLUMINA	Illumina NovaSeq 6000	SRP309704	PRJNA707431	35137207		SRS8398492	SAMN18205129	simple	9606	Homo sapiens	GSM5140302	GEO	SRA1203922	7	2021	Luan	Cell line:A549	siS7_13_1.Riboseq	RFP	1					lung	A549		auto_2633	TRUE		auto	RFP_NA_1_NA_lung_A549_NA_NA_auto_2633_NA	FALSE	0.344206	0.876267
PRJNA453915	SRR7073134					SRX4003582		RNA-Seq	cDNA		SINGLE			ILLUMINA		SRP143452	PRJNA453915	30029003	453915	SRS3225384	SAMN08993041			Homo sapiens	GSM3118941	GEO	SRA696853	7	2018	Darnell	HEK293T cells, ATCC CRL-3216 + AAVS1:hrGFP	293t_hrgfp_leutorin1_3h	RFP			chx		3h	kidney	HEK293		hrgfp_leutorin1	TRUE		TESHOME	RFP_NA_NA_3h_kidney_HEK293_NA_NA_hrgfp_leutorin1_chx	FALSE	0.344178	0.0718605
PRJNA512837	SRR8392711	133535948	9067152644	67	3869	SRX5202422		RNA-Seq	cDNA	TRANSCRIPTOMIC	SINGLE	0	0	ILLUMINA	Illumina HiSeq 2000	SRP175158	PRJNA512837	33257563		SRS4207573	SAMN10689169	simple	9606	Homo sapiens	GSM3537596	GEO	SRA830119	12	2020	Sabath	WI38 cells	Senescent_HS1_Ribo_Seq	RFP	1								auto_1256	TRUE		auto	RFP_NA_1_NA_NA_NA_NA_NA_auto_1256_NA	FALSE	0.344032	0.263753
PRJNA509149	SRR8309253					SRX5123183		OTHER	other		SINGLE			ILLUMINA		SRP173217	PRJNA509149	30626644	509149	SRS4136498	SAMN10564032			Homo sapiens	GSM3506285	GEO	SRA822679	12	2018	Walczak	Membrane fraction from HEK293 cells	wt_memb_a	RFP	1	WT	chx			kidney	HEK293		memb	TRUE		TESHOME	RFP_NA_1_NA_kidney_HEK293_WT_NA_memb_chx	FALSE	0.343203	0.0529853
PRJNA379447	SRR5350744					SRX2647166		OTHER	other		SINGLE			ILLUMINA		SRP102021	PRJNA379447	28388414	379447	SRS2052447	SAMN06608452			Homo sapiens	GSM2538903	GEO	SRA546520	6	2017	Slobodin	PC9	PC9.C.ribo	RFP		WT	chx			lung	PC9			TRUE		HÃ…KON	RFP_NA_NA_NA_lung_PC9_WT_NA_NA_chx	FALSE	0.343195	0.353535
PRJNA223608	SRR1598971					SRX367006		RNA-Seq	cDNA		SINGLE			ILLUMINA		SRP031849	PRJNA223608	25070500	223608	SRS493132	SAMN02380977			Homo sapiens	GSM1248735	GEO	SRA107958	7	2015	Guo	U2OS cells	mock-transfected ribosome profiling	RFP	1	WT	chx			bone	U2OS			TRUE		HÃ…KON	RFP_NA_1_NA_bone_U2OS_WT_NA_NA_chx	FALSE	0.342896	0.0658921
PRJNA664116	SRR12660880	55274195	4200838820	76	1428	SRX9141932		OTHER	other	TRANSCRIPTOMIC	SINGLE	0	0	ILLUMINA	NextSeq 500	SRP282906	PRJNA664116	34615539		SRS7383244	SAMN16198223	simple	9606	Homo sapiens	GSM4793179	GEO	SRA1127134	8	2021	Gillen	HEK293 cells	Ribo-Seq RPF_Control_rep1	RFP	1	WT				kidney	HEK293			TRUE		auto	RFP_NA_1_NA_kidney_HEK293_WT_NA_NA_NA	FALSE	0.342787	0.733318
PRJNA414611	SRR6181550					SRX3292092		OTHER	other		SINGLE			ILLUMINA		SRP120157	PRJNA414611	30591072	414611	SRS2601271	SAMN07795663			Homo sapiens	GSM2817683	GEO	SRA620345	4	2018	Murat	ATCC Cell Lines	RPF-sc-4	RFP	4		chx	2		ovary	HeLa		sc	TRUE		TESHOME	RFP_2_4_NA_ovary_HeLa_NA_NA_sc_chx	FALSE	0.342755	0.252106
PRJNA275386	SRR1803160					SRX876737		OTHER	other		SINGLE			ILLUMINA		SRP055009	PRJNA275386	26297486	275386	SRS845410	SAMN03344051			Homo sapiens	GSM1609391	GEO	SRA241011	2	2015	Cenik	EBV-transformed lymphoblastoid cells	GM18502_Rep1	RFP	1		chx			bone	LCL		GM18502	TRUE		KORNEL	RFP_NA_1_NA_bone_LCL_NA_NA_GM18502_chx	FALSE	0.342678	0.105847
PRJNA655417	SRR12391530					SRX8889965		OTHER	other		SINGLE			ILLUMINA		SRP276055	PRJNA655417	32992958	655417	SRS7149444	SAMN15734841			Homo sapiens	GSM4711313	GEO	SRA1108561	9	2020	Kiltschewskij	SH-SY5Y cell line	depol 2 hours 2 [k2h2.ribo]	RFP	2	depol	chx		2h	brain	SHSY5Y			TRUE		PREETI	RFP_NA_2_2h_brain_SHSY5Y_depol_NA_NA_chx	FALSE	0.34258	0.102979
PRJNA556704	SRR9839460					SRX6594277		OTHER	other		SINGLE			ILLUMINA		SRP216422	PRJNA556704	31791371	556704	SRS5159347	SAMN12365725			Homo sapiens	GSM3954920	GEO	SRA927081	10	2019	Wilczynska	HEK293 cells	RPF_Control_rep1	RFP	1	WT	chx			kidney	HEK293			TRUE		PREETI	RFP_NA_1_NA_kidney_HEK293_WT_NA_NA_chx	FALSE	0.342553	0.723773
PRJNA613736	SRR11362461					SRX7963883		RNA-Seq	cDNA		SINGLE			ILLUMINA		SRP253534	PRJNA613736	32503920	613736	SRS6349901	SAMN14418996			Homo sapiens	GSM4426003	GEO	SRA1057647	3	2020	Zinshteyn	K562 cells	set3_qiagen_fastselect_2	RFP	2		chx	3		bone	K562		qiagen	TRUE		PREETI	RFP_3_2_NA_bone_K562_NA_NA_qiagen_chx	FALSE	0.342538	0.102683
PRJNA870413	SRR21102194	59843719	3052029669	51	1216	SRX17115760	GSM6470181	OTHER	other	TRANSCRIPTOMIC	SINGLE	0	0	ILLUMINA	NextSeq 550	SRP392653	PRJNA870413	1		SRS14689937	SAMN30370409	simple	9606	Homo sapiens	GSM6470181	AG Teleman, B140, DKFZ	SRA1519790	2	2023	Makar	HeLa	R2_80S_siABC	RFP	2	KO				ovary	HeLa	PRRC2		TRUE		HÃ¥kon	RFP_NA_2_NA_ovary_HeLa_KO_PRRC2_NA_NA	FALSE	0.342468	0.569286
PRJNA223608	SRR1598981					SRX367003		RNA-Seq	cDNA		SINGLE			ILLUMINA		SRP031849	PRJNA223608	25070500	223608	SRS493129	SAMN02380973			Homo sapiens	GSM1248732	GEO	SRA107958	7	2015	Guo	U2OS cells	miR-155-transfected ribosome profiling	RFP	1	mir155	chx			bone	U2OS			TRUE		HÃ…KON	RFP_NA_1_NA_bone_U2OS_mir155_NA_NA_chx	FALSE	0.342175	0.0546863
PRJNA472636	SRR7207283					SRX4116268		OTHER	other		SINGLE			ILLUMINA		SRP148767	PRJNA472636	30089253	472636	SRS3331556	SAMN09238858			Homo sapiens	GSM3150295	GEO	SRA709715	7	2018	Gameiro	Breast epithelial cell	TAM_NoG_04hr.3	RFP	3	NoG	chx		4h	breast	MCF10A		TAM	TRUE		TESHOME	RFP_NA_3_4h_breast_MCF10A_NoG_NA_TAM_chx	FALSE	0.341829	0.0441128
PRJNA667952	SRR12790129	44590822	2184950278	49	1386	SRX9259284		OTHER	other	TRANSCRIPTOMIC	SINGLE	0	0	ILLUMINA	Illumina HiSeq 2500	SRP286677	PRJNA667952	33597240		SRS7490377	SAMN16392804	simple	9606	Homo sapiens	GSM4822815	GEO	SRA1140064	12	2020	Dong	Human embryonic kidney cells	Ribo_seq_Control_rep1	RFP	1	WT				kidney				TRUE		auto	RFP_NA_1_NA_kidney_NA_WT_NA_NA_NA	FALSE	0.341285	0.14266
PRJNA244941	SRR1257226					SRX522458		OTHER	other		SINGLE			ILLUMINA		SRP041298	PRJNA244941	26338483	244941	SRS594813	SAMN02730053			Homo sapiens	GSM1371444	GEO	SRA158793	8	2015	Jang	U2-OS Cells	WT_ribo_profile_CT02_rep1	RFP	1	WT	chx			bone	U2OS		CT02	TRUE		HÃ…KON	RFP_NA_1_NA_bone_U2OS_WT_NA_CT02_chx	FALSE	0.341225	0.275501
PRJNA472015	SRR7182550					SRX4099349		OTHER	other		SINGLE			ILLUMINA		SRP148422	PRJNA472015	30673779	472015	SRS3315534	SAMN09223524			Homo sapiens	GSM3146279	GEO	SRA706809	5	2018	Machkovech	A549 cells	ribosome footprints_ltm_untr	RFP			ltm			lung	A549		ctrl	TRUE		TESHOME	RFP_NA_NA_NA_lung_A549_NA_NA_ctrl_ltm	FALSE	0.34104	0.0404443
PRJNA258219	SRR1551155					SRX680694		RNA-Seq	cDNA		SINGLE			ILLUMINA		SRP045501	PRJNA258219	25263593	258219	SRS684372	SAMN02990365			Homo sapiens	GSM1479588	GEO	SRA179319	7	2015	Eichhorn	U2OS cell line	mock-transfected U2OS RPF	RFP		WT	chx			bone	U2OS			TRUE		HÃ…KON	RFP_NA_NA_NA_bone_U2OS_WT_NA_NA_chx	FALSE	0.340695	0.0600591
PRJNA591625	SRR10530146					SRX7214148		OTHER	other		SINGLE			ILLUMINA		SRP233222	PRJNA591625	33330931	591625	SRS5716951	SAMN13385768			Homo sapiens	GSM4192123	GEO	SRA1002630	11	2020	Selmi	human embryonic stem cells	H9.WT.2.3_Ribo-seq	RFP	3	WT	chx	2		embryonic	H9		1	TRUE		PREETI	RFP_2_3_NA_embryonic_H9_WT_NA_1_chx	FALSE	0.339774	0.0340828
PRJNA285961	SRR2052938					SRX1050355		OTHER	other		SINGLE			ILLUMINA		SRP059187	PRJNA285961	29321322	285961	SRS954619	SAMN03763421			Homo sapiens	GSM1704530	GEO	SRA271639	9	2016	Reid	Huh7 cells	12 h infection ER ribosome profiling (Rep 3)	RFP	3	infected	chx		12hr	liver	Huh7		ER	TRUE		KORNEL	RFP_NA_3_12hr_liver_Huh7_infected_NA_ER_chx	FALSE	0.339378	0.0324582
PRJNA262009	SRR1585533					SRX709876		RNA-Seq	cDNA		SINGLE			ILLUMINA		SRP047476	PRJNA262009	25657249	262009	SRS708893	SAMN03079295			Homo sapiens	GSM1513234	GEO	SRA185822	12	2014	Battle	lymphoblastoid cell lines derived fromHapMap Yoruba individual	GM19141	RFP	48		frozen			bone	LCL		cyto	TRUE		HÃ…KON	RFP_NA_48_NA_bone_LCL_NA_NA_cyto_frozen	FALSE	0.339273	0.0218909
PRJNA861947	SRR20613394	22774043	670657494	29	363	SRX16637174	GSM6381583	OTHER	other	TRANSCRIPTOMIC	SINGLE	0	0	ILLUMINA	Illumina HiSeq 2500	SRP387901	PRJNA861947	1		SRS14271735	SAMN29933667	simple	9606	Homo sapiens	GSM6381583	Waseda University	SRA1462202	7	2022	Makar	293T	Ribo-seq NC control1	RFP	1	WT				kidney	HEK293			TRUE		auto	RFP_NA_1_NA_kidney_HEK293_WT_NA_NA_NA	FALSE	0.338298	0.149432
PRJNA707431	SRR13884601	114650456	3647598361	31	2083	SRX10264938		OTHER	other	TRANSCRIPTOMIC	SINGLE	0	0	ILLUMINA	Illumina NovaSeq 6000	SRP309704	PRJNA707431	35137207		SRS8398569	SAMN18205210	simple	9606	Homo sapiens	GSM5140324	GEO	SRA1203922	7	2021	Luan	Cell line:A549	siS18.Riboseq	RFP	1					lung	A549		auto_2679	TRUE		auto	RFP_NA_1_NA_lung_A549_NA_NA_auto_2679_NA	FALSE	0.338223	0.234623
PRJNA756018	SRR15513153	155854461	5483788970	35	2364	SRX11811947		RNA-Seq	cDNA	TRANSCRIPTOMIC	SINGLE	0	0	ILLUMINA	NextSeq 500	SRP333128	PRJNA756018	35841888		SRS9826465	SAMN20849938	simple	9606	Homo sapiens	GSM5527678	GEO	SRA1280330	7	2022	Chothani	untreated human embryonic stem cells	ES_1 (RiboSeq)	RFP	1									TRUE		auto	RFP_NA_1_NA_NA_NA_NA_NA_NA_NA	FALSE	0.338107	0.4507
PRJEB23298	ERR2189771					ERX2245886	EV_6hpi.rep2_s	OTHER	other		SINGLE			ILLUMINA		ERP105038	PRJEB23298		497718	ERS1992223	SAMEA104367245			Homo sapiens	SAMEA104367245	Dr. Valeria Lulla	ERA1125282	10	2018	Dinan		E-MTAB-6180:EV_6hpi.rep2	RFP	2	EV	chx		6h	muscle	RD			TRUE		TESHOME	RFP_NA_2_6h_muscle_RD_EV_NA_NA_chx	FALSE	0.337178	0.0254819
PRJNA414611	SRR6181573					SRX3292098		OTHER	other		SINGLE			ILLUMINA		SRP120157	PRJNA414611	30591072	414611	SRS2601277	SAMN07795675			Homo sapiens	GSM2817689	GEO	SRA620345	4	2018	Murat	ATCC Cell Lines	RPF-DHX9-3	RFP	3		chx	1		ovary	HeLa		DHX9	TRUE		TESHOME	RFP_1_3_NA_ovary_HeLa_NA_NA_DHX9_chx	FALSE	0.336837	0.344886
PRJNA854905	SRR19918542	25761804	1288090200	50	624	SRX15961066	GSM6284786	OTHER	other	TRANSCRIPTOMIC	SINGLE	0	0	ILLUMINA	Illumina HiSeq 2500	SRP384536	PRJNA854905	35891396		SRS13647408	SAMN29472422	simple	9606	Homo sapiens	GSM6284786	Kamini Singh, Molecular Pharmacology, Albert Einstein College of Medicine	SRA1447869	7	2022	Singh	primary hNPC	A2_ribo	RFP	6					throat	NPC		auto_3455	TRUE		auto	RFP_NA_6_NA_throat_NPC_NA_NA_auto_3455_NA	FALSE	0.336259	0.0925828
PRJNA870413	SRR21102202	130071279	6633635229	51	2887	SRX17115752	GSM6470173	OTHER	other	TRANSCRIPTOMIC	SINGLE	0	0	ILLUMINA	NextSeq 550	SRP392653	PRJNA870413	1		SRS14689929	SAMN30370417	simple	9606	Homo sapiens	GSM6470173	AG Teleman, B140, DKFZ	SRA1519790	2	2023	Makar	HeLa	R1_80S_siABC	RFP	1	KO				ovary	HeLa	PRRC2		TRUE		HÃ¥kon	RFP_NA_1_NA_ovary_HeLa_KO_PRRC2_NA_NA	FALSE	0.33618	1.16517
PRJNA599422	SRR10846526					SRX7517151		OTHER	other		SINGLE			ILLUMINA		SRP239882	PRJNA599422		599422	SRS5956817	SAMN13750417			Homo sapiens	GSM4255693	GEO	SRA1021798	8	2020	Ouspenskaia	B721.221	B721.221_A0101	RFP	2		chx	1		bone	LCL			TRUE		PREETI	RFP_1_2_NA_bone_LCL_NA_NA_NA_chx	FALSE	0.33572	0.231298
PRJNA589466	SRR10441366					SRX7136112		RNA-Seq	cDNA		SINGLE			ILLUMINA		SRP229759	PRJNA589466	32821933	589466	SRS5645030	SAMN13281629			Homo sapiens	GSM4160134	GEO	SRA995632	8	2020	Patel	miR-1 expressing cells	miR-1 expressing cells rep 1 [Ribo-seq]	RFP	1	OE	chx			kidney	HEK293		mir1	TRUE		PREETI	RFP_NA_1_NA_kidney_HEK293_OE_NA_mir1_chx	FALSE	0.335656	0.59325
PRJNA439265	SRR6869752					SRX3824007		RNA-Seq	cDNA		SINGLE			ILLUMINA		SRP136094	PRJNA439265	31174582	439265	SRS3073335	SAMN08743012			Homo sapiens	GSM3057209	GEO	SRA668547	5	2019	BornelÃ¶v	H9 cells	Riboseq self-renewing rep2	RFP	2		chx			blood	H9		renewal	TRUE		TESHOME	RFP_NA_2_NA_blood_H9_NA_NA_renewal_chx	FALSE	0.335626	0.0800517
PRJNA414611	SRR6181539					SRX3292088		OTHER	other		SINGLE			ILLUMINA		SRP120157	PRJNA414611	30591072	414611	SRS2601267	SAMN07795659			Homo sapiens	GSM2817679	GEO	SRA620345	4	2018	Murat	ATCC Cell Lines	RPF-NT-1	RFP	1		chx	2		ovary	HeLa		NT	TRUE		TESHOME	RFP_2_1_NA_ovary_HeLa_NA_NA_NT_chx	FALSE	0.335584	0.261516
PRJNA665035	SRR12693496					SRX9173294		OTHER	other		SINGLE			ILLUMINA		SRP284977	PRJNA665035	32995776	665035	SRS7410872	SAMN16238712			Homo sapiens	GSM4798523	GEO	SRA1129972	10	2020	Rao	HEK293	NSP2-HEK-2_ribo	RFP	2	OE	chx			kidney	HEK293	NSP2		TRUE		PREETI	RFP_NA_2_NA_kidney_HEK293_OE_NSP2_NA_chx	FALSE	0.335529	0.306086
PRJNA272597	SRR1758390					SRX842640		RNA-Seq	cDNA		SINGLE			ILLUMINA		SRP052229	PRJNA272597	26729373	272597	SRS818814	SAMN03284318			Homo sapiens	GSM1585222	GEO	SRA231648	1	2016	Xu	Human fibroblast	5_corr d-leucine rep2 RPF	RFP	2	CORR	chx	1	5h	fibroblast	NONE		dLeucine	TRUE		KORNEL	RFP_1_2_5h_fibroblast_NONE_CORR_NA_dLeucine_chx	FALSE	0.335024	0.234473
PRJNA353260	SRR5013258					SRX2343259	2197	RNA-Seq	cDNA		SINGLE			ILLUMINA		SRP093314	PRJNA353260	28003488	353260	SRS1795333	SAMN06013483			Homo sapiens	RPF mock 2h	SUN YAT-SEN UNIVERSITY	SRA492656	12	2016	Dai			RFP	1	WT	chx		2h	ovary	HeLa			TRUE		KORNEL	RFP_NA_1_2h_ovary_HeLa_WT_NA_NA_chx	FALSE	0.335001	3.03455
PRJNA707431	SRR13884541	89367858	2805922334	31	1625	SRX10264810		OTHER	other	TRANSCRIPTOMIC	SINGLE	0	0	ILLUMINA	Illumina NovaSeq 6000	SRP309704	PRJNA707431	35137207		SRS8398438	SAMN18205162	simple	9606	Homo sapiens	GSM5140264	GEO	SRA1203922	7	2021	Luan	Cell line:A549	siL28.Riboseq	RFP	1					lung	A549		auto_2611	TRUE		auto	RFP_NA_1_NA_lung_A549_NA_NA_auto_2611_NA	FALSE	0.334884	0.428156
PRJNA605114	SRR12879063	28283177	1009864800	35	705	SRX7685813		RNA-Seq	cDNA	TRANSCRIPTOMIC	SINGLE	0	0	ILLUMINA	Illumina HiSeq 3000	SRP247494	PRJNA605114	33053355		SRS6112316	SAMN14049756	simple	9606	Homo sapiens	GSM4299131	GEO	SRA1038955	10	2020	Weber	HEK293T	Wild-type replicate 1 for Ribo-seq	RFP	1					kidney	HEK293			TRUE		auto	RFP_NA_1_NA_kidney_HEK293_NA_NA_NA_NA	FALSE	0.33465	0.123031
PRJNA655835	SRR12407382	28283177	1009864800	35	705	SRX8905246		OTHER	other	TRANSCRIPTOMIC	SINGLE	0	0	ILLUMINA	Illumina HiSeq 3000	SRP276619	PRJNA655835	36473845		SRS7163070	SAMN15756320	simple	9606	Homo sapiens	GSM4713003	GEO	SRA1109746	11	2022	Weber	HEK293T	control-1_Ribo: Wild-type replicate 1 for Ribo-seq	RFP	1	WT				kidney	HEK293			TRUE		Hakon	RFP_NA_1_NA_kidney_HEK293_WT_NA_NA_NA	FALSE	0.334528	0.225464
PRJNA600267	SRR10859278	46816577	2340828850	50	1062	SRX7529375		OTHER	other	TRANSCRIPTOMIC	SINGLE	0	0	ILLUMINA	Illumina HiSeq 2500	SRP240955	PRJNA600267	35953468		SRS5968660	SAMN13810466	simple	9606	Homo sapiens	GSM4258241	GEO	SRA1023076	6	2022	Jungfleisch	whole cell	Cytosol CHIKV-infected RPF, replicate 4	RFP	4								cyto	TRUE		auto	RFP_NA_4_NA_NA_NA_NA_NA_cyto_NA	FALSE	0.333944	0.0701161
PRJNA414611	SRR6181549					SRX3292092		OTHER	other		SINGLE			ILLUMINA		SRP120157	PRJNA414611	30591072	414611	SRS2601271	SAMN07795663			Homo sapiens	GSM2817683	GEO	SRA620345	4	2018	Murat	ATCC Cell Lines	RPF-sc-4	RFP	4		chx	1		ovary	HeLa		sc	TRUE		TESHOME	RFP_1_4_NA_ovary_HeLa_NA_NA_sc_chx	FALSE	0.33387	0.194531
PRJNA756018	SRR15513221	38112173	1348185447	35	587	SRX11812015		RNA-Seq	cDNA	TRANSCRIPTOMIC	SINGLE	0	0	ILLUMINA	NextSeq 500	SRP333128	PRJNA756018	35841888		SRS9826533	SAMN20849920	simple	9606	Homo sapiens	GSM5527746	GEO	SRA1280330	7	2022	Chothani	untreated normal human vascular smooth muscle cells	VSMC_4 (RiboSeq)	RFP	1					muscle			auto_3041	TRUE		auto	RFP_NA_1_NA_muscle_NA_NA_NA_auto_3041_NA	FALSE	0.333863	0.0398088
PRJNA448763	SRR6939930					SRX3884282		OTHER	other		SINGLE			ILLUMINA		SRP137150	PRJNA448763	31281537	448763	SRS3123555	SAMN08864584			Homo sapiens	GSM3081742	GEO	SRA681490	6	2019	Zou	tumor_RPF	LC033_tumor_RPF	RFP	2		chx			liver	NONE		tumor	TRUE		TESHOME	RFP_NA_2_NA_liver_NONE_NA_NA_tumor_chx	FALSE	0.333715	0.437889
GSE208041	SRR20106163	167038519	5893665893	35	1959	SRX16141480	GSM6333418	OTHER	other	TRANSCRIPTOMIC	SINGLE	0	0	ILLUMINA	Illumina NovaSeq 6000	SRP386079	PRJNA858047	36284713		SRS13803505	SAMN29661001	simple	9606	Homo sapiens	GSM6333418	AG Uhlenhaut, Institute for Diabetes and Endocrinology (IDE), Helmholz Zentrum MÃ¼nchen	SRA1453914	10	2022	Ansari	THP-1	THP-1 cells, Riboseq/LPS, 3h, rep1	RFP	1				3h	blood	THP1		LPS	TRUE		Michal	RFP_NA_1_3h_blood_THP1_NA_NA_LPS_NA	FALSE	0.333697	2.04901
PRJNA806946	SRR18017743	27102506	988692779	36	392	SRX14171972	GSM5899114	RNA-Seq	cDNA	TRANSCRIPTOMIC	SINGLE	0	0	ILLUMINA	NextSeq 2000	SRP359785	PRJNA806946	36433934		SRS11995935	SAMN25941488	simple	9606	Homo sapiens	GSM5899114	van Heesch, Princess Maxima Center	SRA1372962	12	2022	Palomar-Siles	epithelial	Ribo-Seq H1299-R213XG418-1	RFP	1								auto_3315	TRUE		auto	RFP_NA_1_NA_NA_NA_NA_NA_auto_3315_NA	FALSE	0.333656	0.0897428
PRJNA512837	SRR8392705	91019238	6631519393	72	2755	SRX5202416		RNA-Seq	cDNA	TRANSCRIPTOMIC	SINGLE	0	0	ILLUMINA	Illumina HiSeq 2000	SRP175158	PRJNA512837	33257563		SRS4207567	SAMN10689175	simple	9606	Homo sapiens	GSM3537590	GEO	SRA830119	12	2020	Sabath	WI38 cells	Young1_Ribo_Seq	RFP	1									TRUE		auto	RFP_NA_1_NA_NA_NA_NA_NA_NA_NA	FALSE	0.333363	0.269743
PRJEB33244	ERR3403477					ERX3427236	M1RPF_s	RNA-Seq	size fractionation		SINGLE			ILLUMINA		ERP116020	PRJEB33244		706227	ERS3547454	SAMEA5744167			Homo sapiens	E-MTAB-8100:M1RPF	Earlham Institute	ERA2022066	3	2021	Lezina	non-small cell lung carcinoma	M1RPF	RFP	1	KO_mutant	chx	1		lung	H1299	p53		TRUE		PREETI	RFP_1_1_NA_lung_H1299_KO_mutant_p53_NA_chx	FALSE	0.333081	0.250776
PRJNA287112	SRR2064023					SRX1059599		RNA-Seq	cDNA		SINGLE			ILLUMINA		SRP059531	PRJNA287112	26599541	287112	SRS961858	SAMN03776555			Homo sapiens	GSM1712277	GEO	SRA273059	11	2015	Tirosh	footprints fibroblasts infected for 72hr	footprints fibroblasts infected for 72hr	RFP		infected	chx		72hr	fibroblast	NONE			TRUE		KORNEL	RFP_NA_NA_72hr_fibroblast_NONE_infected_NA_NA_chx	FALSE	0.332954	0.132081
PRJNA275386	SRR1803165					SRX876742		OTHER	other		SINGLE			ILLUMINA		SRP055009	PRJNA275386	26297486	275386	SRS845404	SAMN03344023			Homo sapiens	GSM1609396	GEO	SRA241011	2	2015	Cenik	EBV-transformed lymphoblastoid cells	GM18519_Rep1	RFP	1		chx			bone	LCL		GM18519	TRUE		KORNEL	RFP_NA_1_NA_bone_LCL_NA_NA_GM18519_chx	FALSE	0.332743	0.01841
GSE208041	SRR20106162	156585165	5535521326	35	1842	SRX16141481	GSM6333419	OTHER	other	TRANSCRIPTOMIC	SINGLE	0	0	ILLUMINA	Illumina NovaSeq 6000	SRP386079	PRJNA858047	36284713		SRS13803506	SAMN29661000	simple	9606	Homo sapiens	GSM6333419	AG Uhlenhaut, Institute for Diabetes and Endocrinology (IDE), Helmholz Zentrum MÃ¼nchen	SRA1453914	10	2022	Ansari	THP-1	THP-1 cells, Riboseq/LPS, 3h, rep2	RFP	2				3h	blood	THP1		LPS	TRUE		Michal	RFP_NA_2_3h_blood_THP1_NA_NA_LPS_NA	FALSE	0.332452	1.5466
PRJNA655417	SRR12391524					SRX8889959		OTHER	other		SINGLE			ILLUMINA		SRP276055	PRJNA655417	32992958	655417	SRS7149438	SAMN15734798			Homo sapiens	GSM4711307	GEO	SRA1108561	9	2020	Kiltschewskij	SH-SY5Y cell line	depol 0 hours 4 [k0h4.ribo]	RFP	4	depol	chx		0h	brain	SHSY5Y			TRUE		PREETI	RFP_NA_4_0h_brain_SHSY5Y_depol_NA_NA_chx	FALSE	0.332326	0.0485073
PRJNA530968	SRR8848243					SRX5635944		OTHER	other		SINGLE			ILLUMINA		SRP190851	PRJNA530968		530968	SRS4590081	SAMN11345373			Homo sapiens	GSM3704305	GEO	SRA869611	3	2021	ChhipiShrestha	HeLa S3 cells	ribo_MeOH_rep1	RFP	1		chx			ovary	HeLa		MeOH	TRUE		TESHOME	RFP_NA_1_NA_ovary_HeLa_NA_NA_MeOH_chx	FALSE	0.331728	0.119279
PRJEB28810	ERR2812346					ERX2819177	human_brain_ribo_1_s	RNA-Seq	other		SINGLE			ILLUMINA		ERP111066	PRJEB28810		575406	ERS2758368	SAMEA4939585			Homo sapiens	SAMEA4939585	Lausanne Genomic Technologies Facility, Lausanne, Switzerland	ERA1612101	10	2019	Wang		E-MTAB-7247:human_brain_ribo_1	RFP	1		chx			brain	NONE			TRUE		PREETI	RFP_NA_1_NA_brain_NONE_NA_NA_NA_chx	FALSE	0.331668	0.388814
PRJNA591625	SRR10530124					SRX7214135		OTHER	other		SINGLE			ILLUMINA		SRP233222	PRJNA591625	33330931	591625	SRS5716938	SAMN13385730			Homo sapiens	GSM4192110	GEO	SRA1002630	11	2020	Selmi	human embryonic stem cells	H9.KO2.2.3_Ribo-seq	RFP	3	KO	chx	2		embryonic	H9		1	TRUE		PREETI	RFP_2_3_NA_embryonic_H9_KO_NA_1_chx	FALSE	0.331607	0.0551336
PRJNA604580	SRR11005880	37123934	1893320634	51	723	SRX7666674		RNA-Seq	cDNA	TRANSCRIPTOMIC	SINGLE	0	0	ILLUMINA	Illumina HiSeq 4000	SRP246901	PRJNA604580	32744504		SRS6094904	SAMN13975848	simple	9606	Homo sapiens	GSM4293612	GEO	SRA1036472	8	2020	Gaertner	Unmodified hESCs were differentiated to the PP2 stage	Hs_H1_BG97_3D_d11_ctrl_Riboseq_replicate1_1	RFP	1								auto_2114	TRUE		auto	RFP_NA_1_NA_NA_NA_NA_NA_auto_2114_NA	FALSE	0.331592	0.642456
PRJNA727298	SRR14421812					SRX10773170		OTHER	other		SINGLE			ILLUMINA		SRP318452	PRJNA727298	34107246	727298	SRS8861853	SAMN19014963			Homo sapiens	GSM5281845	GEO	SRA1228234	6	2021	Wu	HEK293 cells	HEK293 si-Control Thapsigargin rep2	RFP	2	WT	chx			kidney	HEK293		thaps	TRUE		PREETI	RFP_NA_2_NA_kidney_HEK293_WT_NA_thaps_chx	FALSE	0.330921	0.153163
PRJNA223060	SRR1562541					SRX690808		OTHER	other		SINGLE			ILLUMINA		SRP031501	PRJNA223060	25122893	223060	SRS693282	SAMN03015187			Homo sapiens	GSM1495246	GEO	SRA107313	9	2014	Gonzalez	normal brain	NormalHumanRiboProfilingC	RFP	3	WT	chx			brain	NONE			TRUE		HÃ…KON	RFP_NA_3_NA_brain_NONE_WT_NA_NA_chx	FALSE	0.330643	0.110249
PRJNA152347	SRR403883					SRX118286	GSM869037: Footprint for vehicle treated PC3 cells, replicate #1.	RNA-Seq	cDNA		SINGLE			ILLUMINA		SRP010679	PRJNA152347	22367541	152347	SRS290855	SAMN00779918			Homo sapiens	GSM869037	GEO	SRA049772	2	2012	Hsieh	PC3 human prostate cancer cells	Footprint for vehicle treated PC3 cells, replicate #1.	RFP	1	WT	chx			prostate	PC3			TRUE		HÃ…KON	RFP_NA_1_NA_prostate_PC3_WT_NA_NA_chx	FALSE	0.330545	0.0160091
PRJNA541324	SRR9019698	25976617	3247077125	125	1751	SRX5797794		RNA-Seq	cDNA	TRANSCRIPTOMIC	SINGLE	0	0	ILLUMINA	Illumina HiSeq 2000	SRP195632	PRJNA541324	31944153		SRS4728938	SAMN11582990	simple	9606	Homo sapiens	GSM3753516	GEO	SRA883373	1	2020	Lyabin	Human embryonic kidney	Ribo-Seq deltaYB-1 (RP_del), run 3	RFP	3					kidney				TRUE		auto	RFP_NA_3_NA_kidney_NA_NA_NA_NA_NA	FALSE	0.330418	0.120759
PRJNA665035	SRR14667086					SRX11005664		OTHER	other		SINGLE			ILLUMINA		SRP284977	PRJNA665035	32995776	665035	SRS9079682	SAMN19367822			Homo sapiens	GSM5342776	GEO	SRA1129972	6	2021	Rao	non-small cell lung carcinoma	NSP1-H1299-2_ribo	RFP	2	OE	chx			lung	H1299	NSP1		TRUE		PREETI	RFP_NA_2_NA_lung_H1299_OE_NSP1_NA_chx	FALSE	0.330289	0.0757869
GSE184519	SRR15992489	10668539	399967660	37	182	SRX12280994		OTHER	other	TRANSCRIPTOMIC	SINGLE	0	0	ILLUMINA	Illumina MiSeq	SRP338054	PRJNA764910	34403584	764910	SRS10254943	SAMN21536501	simple	9606	Homo sapiens	GSM5591843	GEO	SRA1297865	9	2021	Koga	HEK293T	HEK293T_CHX_rep2	RFP	2		chx			kidney	HEK293			TRUE		Michal	RFP_NA_2_NA_kidney_HEK293_NA_NA_NA_chx	FALSE	0.329717	0.0152454
PRJNA533132	SRR8915517	34366912	2611885312	76	940	SRX5696971		OTHER	other	TRANSCRIPTOMIC	SINGLE	0	0	ILLUMINA	NextSeq 500	SRP192770	PRJNA533132	1		SRS4636180	SAMN11440433	simple	9606	Homo sapiens	GSM3725004	GEO	SRA875251	8	2022	Makar	ribosome profiling	#NAME?	RFP	1								auto_1351	TRUE		auto	RFP_NA_1_NA_NA_NA_NA_NA_auto_1351_NA	FALSE	0.32934	0.0830799
GSE208041	SRR20106159	182090437	6431046519	35	2133	SRX16141484	GSM6333422	OTHER	other	TRANSCRIPTOMIC	SINGLE	0	0	ILLUMINA	Illumina NovaSeq 6000	SRP386079	PRJNA858047	36284713		SRS13803509	SAMN29660997	simple	9606	Homo sapiens	GSM6333422	AG Uhlenhaut, Institute for Diabetes and Endocrinology (IDE), Helmholz Zentrum MÃ¼nchen	SRA1453914	10	2022	Ansari	THP-1	THP-1 cells, Riboseq/LPS, 3h, rep5	RFP	5				3h	blood	THP1		LPS	TRUE		Michal	RFP_NA_5_3h_blood_THP1_NA_NA_LPS_NA	FALSE	0.329254	2.09388
PRJNA720951	SRR14200574	130296280	4987455066	38	1996	SRX10567364		OTHER	other	TRANSCRIPTOMIC	SINGLE	0	0	ILLUMINA	Illumina HiSeq 4000	SRP314256	PRJNA720951	34166567		SRS8673641	SAMN18687191	simple	9606	Homo sapiens	GSM5234107	GEO	SRA1217043	4	2021	Sofiadis	Normal lung fibroblasts IMR90	Sen_rep1_rpf	RFP	1					lung			auto_3827	TRUE		auto	RFP_NA_1_NA_lung_NA_NA_NA_auto_3827_NA	FALSE	0.329098	0.0666545
PRJEB33244	ERR3403498					ERX3427246	W3RPF_s	RNA-Seq	size fractionation		SINGLE			ILLUMINA		ERP116020	PRJEB33244		706227	ERS3547464	SAMEA5744177			Homo sapiens	E-MTAB-8100:W3RPF	Earlham Institute	ERA2022066	3	2021	Lezina	non-small cell lung carcinoma	W3RPF	RFP	3	KO_rescue	chx	2		lung	H1299	p53		TRUE		PREETI	RFP_2_3_NA_lung_H1299_KO_rescue_p53_NA_chx	FALSE	0.328876	0.155242
PRJNA275305	SRR1802141					SRX876058		OTHER	other		SINGLE			ILLUMINA		SRP054971	PRJNA275305	26900662	275305	SRS844813	SAMN03342115			Homo sapiens	GSM1608280	GEO	SRA240809	11	2015	Ji	Breast epithelial cell	ERSrcTAM04hr_chx_rep2	RFP	2	KO	chx		4hr	breast	NONE		ER_SrcTAM	TRUE		KORNEL	RFP_NA_2_4hr_breast_NONE_KO_NA_ER_SrcTAM_chx	FALSE	0.328435	0.167905
PRJNA809587	SRR18113782	18779066	2816859900	150	1173	SRX14264388	GSM5911803	OTHER	other	TRANSCRIPTOMIC	SINGLE	0	0	ILLUMINA	Illumina NovaSeq 6000	SRP361145	PRJNA809587	36074823		SRS12083348	SAMN26199020	simple	9606	Homo sapiens	GSM5911803	Wei Xie, School of Life Sciences, Tsinghua University	SRA1376840	10	2022	Zou	Oocyte	h_MII_9_Ribo_rep1	RFP	1								auto_3346	TRUE		auto	RFP_NA_1_NA_NA_NA_NA_NA_auto_3346_NA	FALSE	0.327952	0.0138142
PRJNA870413	SRR21102195	68807252	3509169852	51	1413	SRX17115759	GSM6470180	OTHER	other	TRANSCRIPTOMIC	SINGLE	0	0	ILLUMINA	NextSeq 550	SRP392653	PRJNA870413	1		SRS14689936	SAMN30370410	simple	9606	Homo sapiens	GSM6470180	AG Teleman, B140, DKFZ	SRA1519790	2	2023	Makar	HeLa	R2_80S_IPC	RFP	2	WT				ovary	HeLa			TRUE		HÃ¥kon	RFP_NA_2_NA_ovary_HeLa_WT_NA_NA_NA	FALSE	0.327874	0.705723
PRJNA256321	SRR1528630					SRX663253		OTHER	other		SINGLE			ILLUMINA		SRP044932	PRJNA256321	26878238	256321	SRS668126	SAMN02943082			Homo sapiens	GSM1446832	GEO	SRA176903	2	2016	Loayza-Puch	SUM1315 control RP	SUM1315 control RP	RFP	1	WT	chx			breast	SUM1315			TRUE		HÃ…KON	RFP_NA_1_NA_breast_SUM1315_WT_NA_NA_chx	FALSE	0.327744	0.496862
GSE208041	SRR20106157	196564651	6932495506	35	2303	SRX16141486	GSM6333424	OTHER	other	TRANSCRIPTOMIC	SINGLE	0	0	ILLUMINA	Illumina NovaSeq 6000	SRP386079	PRJNA858047	36284713		SRS13803511	SAMN29660995	simple	9606	Homo sapiens	GSM6333424	AG Uhlenhaut, Institute for Diabetes and Endocrinology (IDE), Helmholz Zentrum MÃ¼nchen	SRA1453914	10	2022	Ansari	THP-1	THP-1 cells, Riboseq/LPSDex, 3h, rep2	RFP	2				3h	blood	THP1		LPSDex	TRUE		Michal	RFP_NA_2_3h_blood_THP1_NA_NA_LPSDex_NA	FALSE	0.327546	1.70576
PRJNA663848	SRR12651180					SRX9132404		OTHER	other		SINGLE			ILLUMINA		SRP282584	PRJNA663848	33556964	663848	SRS7374652	SAMN16179965			Homo sapiens	GSM4787159	GEO	SRA1126237	1	2021	Karasik	whole cell	AK002F: HeLa wt, 1 ÂµM trimer 2-5A, 4.5 h	RFP	2	WT	chx		4.5h	ovary	HeLa		2to5A_1	TRUE		PREETI	RFP_NA_2_4.5h_ovary_HeLa_WT_NA_2to5A_1_chx	FALSE	0.327482	0.129449
PRJNA701951	SRR13712434	16407974	836806674	51	275	SRX10101210		RNA-Seq	cDNA	TRANSCRIPTOMIC	SINGLE	0	0	ILLUMINA	NextSeq 500	SRP306464	PRJNA701951	35388737		SRS8258243	SAMN17918133	simple	9606	Homo sapiens	GSM5082448	GEO	SRA1196414	4	2022	Hisaoka	HCT116	TP53-KO_NCS_RPF_rep2	RFP	2	KO				colon	HCT116	TP53-	auto_2555	TRUE		auto	RFP_NA_2_NA_colon_HCT116_KO_TP53-_auto_2555_NA	FALSE	0.327305	0.178279
PRJNA414611	SRR6181565					SRX3292096		OTHER	other		SINGLE			ILLUMINA		SRP120157	PRJNA414611	30591072	414611	SRS2601275	SAMN07795677			Homo sapiens	GSM2817687	GEO	SRA620345	4	2018	Murat	ATCC Cell Lines	RPF_DHX9_1	RFP	1		chx	3		ovary	HeLa		DHX9	TRUE		TESHOME	RFP_3_1_NA_ovary_HeLa_NA_NA_DHX9_chx	FALSE	0.32726	0.518688
PRJNA818335	SRR18402614	123914429	6195721450	50	1809	SRX14536497	GSM5964230	OTHER	other	TRANSCRIPTOMIC	SINGLE	0	0	ILLUMINA	Illumina NovaSeq 6000	SRP365126	PRJNA818335	36653366		SRS12333595	SAMN26855353	simple	9606	Homo sapiens	GSM5964230	Adrian Whitehouse, Faculty of Biological Sciences, University of Leeds	SRA1390089	12	2022	Murphy	TREx BCBL1-Rta	Repeat 2: Scrambled shRNA - ribosome footprint RNA	RFP	1								auto_3360	TRUE		auto	RFP_NA_1_NA_NA_NA_NA_NA_auto_3360_NA	FALSE	0.327053	0.0669643
PRJNA163111	SRR493749					SRX145831	GSM926676: HEK293 high	OTHER	other		SINGLE			ILLUMINA		SRP012648	PRJNA163111	22836135	163111	SRS312027	SAMN00990792			Homo sapiens	GSM926676	GEO	SRA052308	7	2012	Ingolia	HEK293 high	HEK293 high	RFP		high	chx			kidney	HEK293			TRUE		HÃ…KON	RFP_NA_NA_NA_kidney_HEK293_high_NA_NA_chx	FALSE	0.32691	0.116061
PRJNA478455	SRR7451196					SRX4321692	D17-4825	OTHER	RT-PCR		SINGLE			ILLUMINA		SRP151602	PRJNA478455	30466063	478455	SRS3484159	SAMN09516442			Homo sapiens	RP30-2	MASSACHUSETTS INSTITUTE OF TECHNOLOGY	SRA730597	6	2018	Rothenberg		RFP_PBS_30_min_Rep_2	RFP	2		chx		30m	breast	MCF10A		PBS	TRUE		TESHOME	RFP_NA_2_30m_breast_MCF10A_NA_NA_PBS_chx	FALSE	0.326211	0.944006
PRJNA285961	SRR2052983					SRX1050400		OTHER	other		SINGLE			ILLUMINA		SRP059187	PRJNA285961	29321322	285961	SRS954581	SAMN03763467			Homo sapiens	GSM1704575	GEO	SRA271639	9	2016	Reid	Huh7 cells	12 h DENV1 infection Total cell lysate ribosome profiling (rep 1)	RFP	1	infected	chx		12hr	liver	Huh7		DENV1	TRUE		KORNEL	RFP_NA_1_12hr_liver_Huh7_infected_NA_DENV1_chx	FALSE	0.32609	0.0752333
PRJNA540298	SRR11626659	60962537	3048126850	50	1162	SRX8190763		OTHER	other	TRANSCRIPTOMIC	SINGLE	0	0	ILLUMINA	Illumina HiSeq 2500	SRP194188	PRJNA540298	34244513		SRS6549553	SAMN14755286	simple	9606	Homo sapiens	GSM4504143	GEO	SRA880706	3	2021	Lim	Prostate cancer tissue	Lucap 81 Tumor sample, Ribosome bound RNA, replicate1	RFP	1					prostate			auto_1355	TRUE		auto	RFP_NA_1_NA_prostate_NA_NA_NA_auto_1355_NA	FALSE	0.325679	0.448209
PRJNA414611	SRR6181542					SRX3292090		OTHER	other		SINGLE			ILLUMINA		SRP120157	PRJNA414611	30591072	414611	SRS2601269	SAMN07795657			Homo sapiens	GSM2817681	GEO	SRA620345	4	2018	Murat	ATCC Cell Lines	RPF_sc_2	RFP	2		chx	1		ovary	HeLa		sc	TRUE		TESHOME	RFP_1_2_NA_ovary_HeLa_NA_NA_sc_chx	FALSE	0.325566	0.225832
PRJNA665035	SRR14667087					SRX11005665		OTHER	other		SINGLE			ILLUMINA		SRP284977	PRJNA665035	32995776	665035	SRS9079685	SAMN19367821			Homo sapiens	GSM5342777	GEO	SRA1129972	6	2021	Rao	non-small cell lung carcinoma	NSP1-H1299-3_ribo	RFP	3	OE	chx			lung	H1299	NSP1		TRUE		PREETI	RFP_NA_3_NA_lung_H1299_OE_NSP1_NA_chx	FALSE	0.325464	0.0223722
PRJNA707431	SRR13884613	71538184	2287474449	31	1031	SRX10264950		OTHER	other	TRANSCRIPTOMIC	SINGLE	0	0	ILLUMINA	Illumina NovaSeq 6000	SRP309704	PRJNA707431	35137207		SRS8398580	SAMN18205178	simple	9606	Homo sapiens	GSM5140336	GEO	SRA1203922	7	2021	Luan	Cell line:A549	siSA.Riboseq	RFP	1					lung	A549		auto_2691	TRUE		auto	RFP_NA_1_NA_lung_A549_NA_NA_auto_2691_NA	FALSE	0.325238	0.354081
PRJNA414611	SRR6181556					SRX3292094		OTHER	other		SINGLE			ILLUMINA		SRP120157	PRJNA414611	30591072	414611	SRS2601273	SAMN07795665			Homo sapiens	GSM2817685	GEO	SRA620345	4	2018	Murat	ATCC Cell Lines	RPF_DHX36_2	RFP	2		chx	1		ovary	HeLa		DHX36	TRUE		TESHOME	RFP_1_2_NA_ovary_HeLa_NA_NA_DHX36_chx	FALSE	0.324948	0.364815
PRJNA256321	SRR1528631					SRX663254		OTHER	other		SINGLE			ILLUMINA		SRP044932	PRJNA256321	26878238	256321	SRS668127	SAMN02943083			Homo sapiens	GSM1446833	GEO	SRA176903	2	2016	Loayza-Puch	SUM1315 harringtonine RP	SUM1315 harringtonine RP	RFP	1		harr			breast	SUM1315			TRUE		HÃ…KON	RFP_NA_1_NA_breast_SUM1315_NA_NA_NA_harr	FALSE	0.324866	0.256772
PRJNA300627	SRR2873535					SRX1402245		OTHER	other		SINGLE			ILLUMINA		SRP065528	PRJNA300627	26878238	300627	SRS1141527	SAMN04226646			Homo sapiens	GSM1921991	GEO	SRA308231	2	2016	Loayza-Puch	PC3 cell line	PC3 control batch2 RP	RFP	2	WT	chx	2		prostate	PC3			TRUE		KORNEL	RFP_2_2_NA_prostate_PC3_WT_NA_NA_chx	FALSE	0.324429	1.6165
PRJNA701894	SRR13711194	35065912	2139020632	61	840	SRX10100118		OTHER	other	TRANSCRIPTOMIC	SINGLE	0	0	ILLUMINA	Illumina HiSeq 2500	SRP306425	PRJNA701894	35857873		SRS8257256	SAMN17916585	simple	9606	Homo sapiens	GSM5082071	GEO	SRA1196361	7	2022	Sehrawat	HEK293T cells	Control_Ribo-seq_1	RFP	1	WT				kidney	HEK293			TRUE		auto	RFP_NA_1_NA_kidney_HEK293_WT_NA_NA_NA	FALSE	0.324282	0.0611402
PRJNA256319	SRR1528655					SRX663272		OTHER	other		SINGLE			ILLUMINA		SRP044934	PRJNA256319	28274951	256319	SRS668146	SAMN02943073			Homo sapiens	GSM1446851	GEO	SRA176905	7	2017	Loayza-Puch	MCF10A TGFb 2 batch1 RP	MCF10A TGFb 2 batch1 RP	RFP	2		chx	1		breast	MCF10A		TGFb	TRUE		HÃ…KON	RFP_1_2_NA_breast_MCF10A_NA_NA_TGFb_chx	FALSE	0.324268	0.274776
PRJNA527127	SRR8730349					SRX5523337		OTHER	other		SINGLE			ILLUMINA		SRP188457	PRJNA527127	32341360	527127	SRS4490074	SAMN11128259			Homo sapiens	GSM3671389	GEO	SRA860229	4	2020	Whisnant		RP 2 h p.i. - Harringtonin - Rep 2	RFP	2		harr	1	2h	skin	HFF		infe	TRUE		TESHOME	RFP_1_2_2h_skin_HFF_NA_NA_infe_harr	FALSE	0.324106	0.0113662
GSE208041	SRR20106156	81323550	2863078537	35	938	SRX16141487	GSM6333425	OTHER	other	TRANSCRIPTOMIC	SINGLE	0	0	ILLUMINA	Illumina NovaSeq 6000	SRP386079	PRJNA858047	36284713		SRS13803512	SAMN29660994	simple	9606	Homo sapiens	GSM6333425	AG Uhlenhaut, Institute for Diabetes and Endocrinology (IDE), Helmholz Zentrum MÃ¼nchen	SRA1453914	10	2022	Ansari	THP-1	THP-1 cells, Riboseq/LPSDex, 3h, rep3	RFP	3				3h	blood	THP1		LPSDex	TRUE		Michal	RFP_NA_3_3h_blood_THP1_NA_NA_LPSDex_NA	FALSE	0.323471	1.5292
PRJNA667952	SRR12790154	85383885	4183810365	49	2749	SRX9259309		OTHER	other	TRANSCRIPTOMIC	SINGLE	0	0	ILLUMINA	Illumina HiSeq 2500	SRP286677	PRJNA667952	33597240		SRS7490402	SAMN16392816	simple	9606	Homo sapiens	GSM4822840	GEO	SRA1140064	12	2020	Dong	Human embryonic kidney cells	Ribo_seq_shFTO_rep3	RFP	3					kidney			auto_2404	TRUE		auto	RFP_NA_3_NA_kidney_NA_NA_NA_auto_2404_NA	FALSE	0.323419	0.165432
PRJNA533074	SRR8907197					SRX5693018		OTHER	other		SINGLE			ILLUMINA		SRP192707	PRJNA533074	31167946	533074	SRS4632503	SAMN11433230			Homo sapiens	GSM3723762	GEO	SRA874614	5	2019	Holmes	Human Foreskin Fibroblasts	Riboseq_subconfluentHFF_rep1	RFP	1		chx		24h	skin	SCRC1041		Ctrl	TRUE		TESHOME	RFP_NA_1_24h_skin_SCRC1041_NA_NA_Ctrl_chx	FALSE	0.323408	0.0239565
PRJNA600267	SRR10859271	53174056	2658702800	50	1159	SRX7529368		OTHER	other	TRANSCRIPTOMIC	SINGLE	0	0	ILLUMINA	Illumina HiSeq 2500	SRP240955	PRJNA600267	35953468		SRS5968653	SAMN13810473	simple	9606	Homo sapiens	GSM4258234	GEO	SRA1023076	6	2022	Jungfleisch	whole cell	ER CHIKV-infected RPF, replicate 4	RFP	4								ER	TRUE		auto	RFP_NA_4_NA_NA_NA_NA_NA_ER_NA	FALSE	0.32286	0.0518314
PRJNA287137	SRR2064450					SRX1059912		OTHER	other		SINGLE			ILLUMINA		SRP059548	PRJNA287137	26878238	287137	SRS962202	SAMN03776766			Homo sapiens	GSM1712844	GEO	SRA273145	2	2016	Loayza-Puch	T47D cell line	T47D control batch7 RP	RFP	2	WT	chx			breast	T47D			TRUE		KORNEL	RFP_NA_2_NA_breast_T47D_WT_NA_NA_chx	FALSE	0.322607	0.0691167
PRJNA477831	SRR7883750					SRX4721981		OTHER	other		SINGLE			ILLUMINA		SRP151279	PRJNA477831	30590705	477831	SRS3807066	SAMN10097086			Homo sapiens	GSM3396992	GEO	SRA728057	3	2019	Liu	iPSC	qc_sample_ipsc3_low_rnase	RFP	3	low	chx			embryonic	iPSC			TRUE		TESHOME	RFP_NA_3_NA_embryonic_iPSC_low_NA_NA_chx	FALSE	0.322586	0.0105817
PRJNA448763	SRR6939936					SRX3884288		OTHER	other		SINGLE			ILLUMINA		SRP137150	PRJNA448763	31281537	448763	SRS3123561	SAMN08864578			Homo sapiens	GSM3081748	GEO	SRA681490	6	2019	Zou	normal_RPF	LC501_normal_RPF	RFP	4		chx			liver	NONE		normal	TRUE		TESHOME	RFP_NA_4_NA_liver_NONE_NA_NA_normal_chx	FALSE	0.322432	0.246598
PRJNA527127	SRR8730357					SRX5523341		OTHER	other		SINGLE			ILLUMINA		SRP188457	PRJNA527127	32341360	527127	SRS4490078	SAMN11128255			Homo sapiens	GSM3671393	GEO	SRA860229	4	2020	Whisnant		RP 8 h p.i. - Lactimidomycin - Rep 2	RFP	2		ltm	2	8h	skin	HFF		infe	TRUE		TESHOME	RFP_2_2_8h_skin_HFF_NA_NA_infe_ltm	FALSE	0.322402	0.0744732
PRJNA613736	SRR11362456					SRX7963878		RNA-Seq	cDNA		SINGLE			ILLUMINA		SRP253534	PRJNA613736	32503920	613736	SRS6349896	SAMN14419001			Homo sapiens	GSM4425998	GEO	SRA1057647	3	2020	Zinshteyn	K562 cells	set2_NEBNext_20_34	RFP			chx	2		bone	K562		NEB	TRUE		PREETI	RFP_2_NA_NA_bone_K562_NA_NA_NEB_chx	FALSE	0.322057	0.0103277
PRJNA848829	SRR19641902	39095496	1993870296	51	1335	SRX15691921	GSM6239423	OTHER	other	TRANSCRIPTOMIC	SINGLE	0	0	ILLUMINA	Illumina HiSeq 2500	SRP379974	PRJNA848829	35881112		SRS13388322	SAMN29017459	simple	9606	Homo sapiens	GSM6239423	Radiation Oncology, The University of Texas MD Anderson Cancer Center	SRA1436965	6	2022	Miao	Plasma cell	U288 siBCMA 3 replicate [Ribo]	RFP	1								auto_3441	TRUE		auto	RFP_NA_1_NA_NA_NA_NA_NA_auto_3441_NA	FALSE	0.321778	0.0400843
PRJNA660002	SRR12540270					SRX9029929		OTHER	other		SINGLE			ILLUMINA		SRP279211	PRJNA660002	33905506	660002	SRS7281234	SAMN15932203			Homo sapiens	GSM4751858	GEO	SRA1118483	10	2020	Venkataramanan	Colonic carcinoma	HCT-116 cells with DDX3X degron, auxin treated, ribosome profiling, replicate 2	RFP	2	WT	chx			colon	HCT116		auxin	TRUE		PREETI	RFP_NA_2_NA_colon_HCT116_WT_NA_auxin_chx	FALSE	0.321778	0.063247
PRJNA674837	SRR12993026					SRX9444526		OTHER	other		SINGLE			ILLUMINA		SRP291315	PRJNA674837		674837	SRS7658450	SAMN16676320			Homo sapiens	GSM4886540	GEO	SRA1154694	1	2021	Sako	293T	NTC Ribosome profiling Rep1	RFP	1	WT	chx			kidney	HEK293			TRUE		PREETI	RFP_NA_1_NA_kidney_HEK293_WT_NA_NA_chx	FALSE	0.321778	0.0396054
PRJNA801861	SRR17818681	98873749	7415531175	75	2131	SRX13980544	GSM5848572	OTHER	other	TRANSCRIPTOMIC	SINGLE	0	0	ILLUMINA	Illumina NovaSeq 6000	SRP357375	PRJNA801861	1		SRS11817867	SAMN25408099	simple	9606	Homo sapiens	GSM5848572	????	SRA1364092	2	2022	Makar	cervical cancer	HeLa1014_1R for Ribo-seq	RFP	1					ovary	HeLa			TRUE		auto	RFP_NA_1_NA_ovary_HeLa_NA_NA_NA_NA	FALSE	0.321761	0.239368
PRJNA478455	SRR7451197					SRX4321691	D17-4826	OTHER	RT-PCR		SINGLE			ILLUMINA		SRP151602	PRJNA478455	30466063	478455	SRS3484158	SAMN09516443			Homo sapiens	RP60-2	MASSACHUSETTS INSTITUTE OF TECHNOLOGY	SRA730597	6	2018	Rothenberg		RFP_PBS_60_min_Rep_2	RFP	2		chx		60m	breast	MCF10A		PBS	TRUE		TESHOME	RFP_NA_2_60m_breast_MCF10A_NA_NA_PBS_chx	FALSE	0.321309	0.934642
PRJNA272597	SRR1758408					SRX842658		RNA-Seq	cDNA		SINGLE			ILLUMINA		SRP052229	PRJNA272597	26729373	272597	SRS818832	SAMN03284281			Homo sapiens	GSM1585240	GEO	SRA231648	1	2016	Xu	Human fibroblast	7_corr d-leucine rep3 RPF	RFP	3	CORR	chx	2		fibroblast	NONE		dLeucine	TRUE		KORNEL	RFP_2_3_NA_fibroblast_NONE_CORR_NA_dLeucine_chx	FALSE	0.320891	0.571139
PRJNA591767	SRR10533456	43737586	2230616886	51	841	SRX7217422		OTHER	other	TRANSCRIPTOMIC	SINGLE	0	0	ILLUMINA	Illumina HiSeq 2000	SRP233276	PRJNA591767	32488114		SRS5720070	SAMN13387520	simple	9606	Homo sapiens	GSM4192428	GEO	SRA1003111	11	2019	Choudhary	U251_Riboseq_T0	U251_Riboseq_T0_replicate_2 [U251_L2_0GY_T0_S4_L001]	RFP	1								auto_2041	TRUE		auto	RFP_NA_1_NA_NA_NA_NA_NA_auto_2041_NA	FALSE	0.320864	0.852141
PRJNA512837	SRR8392706	107467947	7943743061	73	3274	SRX5202417		RNA-Seq	cDNA	TRANSCRIPTOMIC	SINGLE	0	0	ILLUMINA	Illumina HiSeq 2000	SRP175158	PRJNA512837	33257563		SRS4207568	SAMN10689174	simple	9606	Homo sapiens	GSM3537591	GEO	SRA830119	12	2020	Sabath	WI38 cells	Young2_Ribo_Seq	RFP	1								auto_1251	TRUE		auto	RFP_NA_1_NA_NA_NA_NA_NA_auto_1251_NA	FALSE	0.320263	0.369355
PRJNA453686	SRR7067557					SRX3998358		RNA-Seq	cDNA		SINGLE			ILLUMINA		SRP142722	PRJNA453686	30305285	453686	SRS3222378	SAMN08985505			Homo sapiens	GSM3112196	GEO	SRA695700	1	2019	Krishnamoorthy	C643	C643-spl-rev_RP_1	RFP	1		chx			thyroid	C643		spl_rev	TRUE		TESHOME	RFP_NA_1_NA_thyroid_C643_NA_NA_spl_rev_chx	FALSE	0.31927	0.024695
PRJEB26593	ERR2603018					ERX2619674	Ribosome profiling (RiboSeq) of ribosome footprints from LoVo cells at time 0h (mock infection), replicate 3	RNA-Seq	size fractionation		SINGLE			ILLUMINA		ERP108595	PRJEB26593	32584699	635830	ERS2518597	SAMEA4698425			Homo sapiens	0h-r3	INSTITUT DE BIOLOGIE DE ECOLE NORMALE SUPERIEURE (	ERA1502185	5	2020	Besic	epithelial colon adenocarcinoma	Non-infected LoVo cells, Replicate 3	RFP	3	WT	chx			colon	LoVo			TRUE		PREETI	RFP_NA_3_NA_colon_LoVo_WT_NA_NA_chx	FALSE	0.318603	1.38595
PRJNA287136	SRR2064437					SRX1059905		OTHER	other		SINGLE			ILLUMINA		SRP059546	PRJNA287136	26878238	287136	SRS962190	SAMN03776753			Homo sapiens	GSM1712837	GEO	SRA273143	7	2017	Loayza-Puch	SUM159 cell line	SUM159 batch3d control RP	RFP	1	WT	chx	3	0h	breast	SUM159			TRUE		KORNEL	RFP_3_1_0h_breast_SUM159_WT_NA_NA_chx	FALSE	0.318287	0.306588
PRJNA453915	SRR7073142					SRX4003590		RNA-Seq	cDNA		SINGLE			ILLUMINA		SRP143452	PRJNA453915	30029003	453915	SRS3225392	SAMN08993027			Homo sapiens	GSM3118949	GEO	SRA696853	7	2018	Darnell	HEK293T cells, ATCC CRL-3216 + AAVS1:Flag-RagB-Q99L	293t_ragbq99l_rich_3h	RFP			chx		3h	kidney	HEK293		ragbq99l_rich	TRUE		TESHOME	RFP_NA_NA_3h_kidney_HEK293_NA_NA_ragbq99l_rich_chx	FALSE	0.317739	0.0647854
PRJNA453915	SRR7073149					SRX4003597		RNA-Seq	cDNA		SINGLE			ILLUMINA		SRP143452	PRJNA453915	30029003	453915	SRS3225399	SAMN08993020			Homo sapiens	GSM3118956	GEO	SRA696853	7	2018	Darnell	HEK293T cells, ATCC CRL-3216, GCN2 KO	gcn2ko_arg_6h	RFP			chx		6h	kidney	HEK293		gcn2ko_arg	TRUE		TESHOME	RFP_NA_NA_6h_kidney_HEK293_NA_NA_gcn2ko_arg_chx	FALSE	0.317539	0.0948198
PRJNA262009	SRR1585512					SRX709855		RNA-Seq	cDNA		SINGLE			ILLUMINA		SRP047476	PRJNA262009	25657249	262009	SRS708872	SAMN03079274			Homo sapiens	GSM1513213	GEO	SRA185822	7	2015	Battle	lymphoblastoid cell lines derived fromHapMap Yoruba individual	GM18909	RFP	27		frozen			bone	LCL		cyto	TRUE		HÃ…KON	RFP_NA_27_NA_bone_LCL_NA_NA_cyto_frozen	FALSE	0.316838	0.144648
PRJNA401882	SRR5990834					SRX3146522		OTHER	cDNA		SINGLE			ILLUMINA		SRP131318	PRJNA401882	29696588	401882	SRS2478480	SAMN07573555			Homo sapiens	GSM2760255	GEO	SRA604097	5	2018	Lin	muscle	Mock,6.25 h, RPF, rep1	RFP	1	mock	chx	5	6h	muscle	NONE			TRUE		TESHOME	RFP_5_1_6h_muscle_NONE_mock_NA_NA_chx	FALSE	0.316674	0.325712
GSE208041	SRR20106165	102449120	3603610226	35	1178	SRX16141478	GSM6333416	OTHER	other	TRANSCRIPTOMIC	SINGLE	0	0	ILLUMINA	Illumina NovaSeq 6000	SRP386079	PRJNA858047	36284713		SRS13803503	SAMN29661003	simple	9606	Homo sapiens	GSM6333416	AG Uhlenhaut, Institute for Diabetes and Endocrinology (IDE), Helmholz Zentrum MÃ¼nchen	SRA1453914	10	2022	Ansari	THP-1	THP-1 cells, Riboseq/Vehicle, 3h, rep4	RFP	4				3h	blood	THP1		Vehicle	TRUE		Michal	RFP_NA_4_3h_blood_THP1_NA_NA_Vehicle_NA	FALSE	0.316578	1.07076
PRJNA453915	SRR7073141					SRX4003589		RNA-Seq	cDNA		SINGLE			ILLUMINA		SRP143452	PRJNA453915	30029003	453915	SRS3225391	SAMN08993028			Homo sapiens	GSM3118948	GEO	SRA696853	7	2018	Darnell	HEK293T cells, ATCC CRL-3216 + AAVS1:Flag-RagB-Q99L	293t_ragbq99l_leu_3h	RFP			chx		3h	kidney	HEK293		ragbq99l_leu	TRUE		TESHOME	RFP_NA_NA_3h_kidney_HEK293_NA_NA_ragbq99l_leu_chx	FALSE	0.316303	0.148145
PRJNA707431	SRR13884552	76495170	2437247741	31	1348	SRX10264889		OTHER	other	TRANSCRIPTOMIC	SINGLE	0	0	ILLUMINA	Illumina NovaSeq 6000	SRP309704	PRJNA707431	35137207		SRS8398516	SAMN18205151	simple	9606	Homo sapiens	GSM5140275	GEO	SRA1203922	7	2021	Luan	Cell line:A549	siL37.Riboseq	RFP	1					lung	A549		auto_2646	TRUE		auto	RFP_NA_1_NA_lung_A549_NA_NA_auto_2646_NA	FALSE	0.315451	0.0859029
PRJNA806946	SRR18017749	29652731	1061525835	35	407	SRX14171966	GSM5899108	RNA-Seq	cDNA	TRANSCRIPTOMIC	SINGLE	0	0	ILLUMINA	NextSeq 2000	SRP359785	PRJNA806946	36433934		SRS11995929	SAMN25941494	simple	9606	Homo sapiens	GSM5899108	van Heesch, Princess Maxima Center	SRA1372962	12	2022	Palomar-Siles	epithelial	Ribo-Seq H1299-EV5FUR-3	RFP	1								auto_3309	TRUE		auto	RFP_NA_1_NA_NA_NA_NA_NA_auto_3309_NA	FALSE	0.315186	0.13847
PRJNA300627	SRR2873531					SRX1402243		OTHER	other		SINGLE			ILLUMINA		SRP065528	PRJNA300627	26878238	300627	SRS1141530	SAMN04226644			Homo sapiens	GSM1921989	GEO	SRA308231	2	2016	Loayza-Puch	PC3 cell line	PC3 control batch1 RP	RFP	2	WT	chx	1		prostate	PC3			TRUE		KORNEL	RFP_1_2_NA_prostate_PC3_WT_NA_NA_chx	FALSE	0.314372	0.981194
PRJNA729461	SRR14510025	52552922	1309694660	24	551	SRX10855838		OTHER	other	TRANSCRIPTOMIC	SINGLE	0	0	ILLUMINA	Illumina NovaSeq 6000	SRP319472	PRJNA729461	34226921		SRS8951469	SAMN19116480	simple	9606	Homo sapiens	GSM5291869	GEO	SRA1231346	7	2021	Ichihara	HEK293T cells	WT HEK293T CHX replicate 2	RFP	2	WT	chx			kidney	HEK293			TRUE		auto	RFP_NA_2_NA_kidney_HEK293_WT_NA_NA_chx	FALSE	0.314168	0.108392
PRJNA396698	SRR5886316	74275875	5644966500	76	2023	SRX3052236		OTHER	other	TRANSCRIPTOMIC	SINGLE	0	0	ILLUMINA	NextSeq 500	SRP114504	PRJNA396698	30449621		SRS2398664	SAMN07431145	simple	9606	Homo sapiens	GSM2724036	GEO	SRA595098	11	2018	Arango	HeLa cells, Ribosome Protected RNA	WT_Ribo-seq_BioRep_1 (protected RNA)	RFP	1	WT				ovary	HeLa			TRUE		auto	RFP_NA_1_NA_ovary_HeLa_WT_NA_NA_NA	FALSE	0.313909	0.268623
PRJNA472015	SRR7182553					SRX4099352		OTHER	other		SINGLE			ILLUMINA		SRP148422	PRJNA472015	30673779	472015	SRS3315537	SAMN09223521			Homo sapiens	GSM3146282	GEO	SRA706809	5	2018	Machkovech	A549 cells	ribosome footprints_ltm_ifn_vir	RFP			ltm			lung	A549		ifnvir	TRUE		TESHOME	RFP_NA_NA_NA_lung_A549_NA_NA_ifnvir_ltm	FALSE	0.313894	0.0568616
PRJNA523167	SRR8590797					SRX5391058		RNA-Seq	cDNA		SINGLE			ILLUMINA		SRP186252	PRJNA523167	31911279	523167	SRS4378999	SAMN10965457			Homo sapiens	GSM3611945	GEO	SRA850276	12	2019	Vaklavas	Human triple negative breast cancer	SUM159PT Full Serum 5 hours ribosome protected fragments	RFP	2	full	chx		5h	breast	SUM159			TRUE		TESHOME	RFP_NA_2_5h_breast_SUM159_full_NA_NA_chx	FALSE	0.313894	0.0494306
PRJNA731488	SRR14605918	16946552	434797062	25	210	SRX10949049		OTHER	other	TRANSCRIPTOMIC	SINGLE	0	0	ILLUMINA	Illumina HiSeq 4000	SRP320683	PRJNA731488	34876589		SRS9027922	SAMN19287234	simple	9606	Homo sapiens	GSM5326923	GEO	SRA1234845	11	2021	Kashiwagi	HEK293 T-REx	Ribo_vec_DMSO2	RFP	1				auto57	kidney	HEK293		dmso	TRUE		auto	RFP_NA_1_auto57_kidney_HEK293_NA_NA_dmso_NA	FALSE	0.313894	0.0442329
PRJNA665035	SRR14667085					SRX11005663		OTHER	other		SINGLE			ILLUMINA		SRP284977	PRJNA665035	32995776	665035	SRS9079683	SAMN19367823			Homo sapiens	GSM5342775	GEO	SRA1129972	6	2021	Rao	non-small cell lung carcinoma	NSP1-H1299-1_ribo	RFP	1	OE	chx			lung	H1299	NSP1		TRUE		PREETI	RFP_NA_1_NA_lung_H1299_OE_NSP1_NA_chx	FALSE	0.313894	0.0499283
PRJNA310107	SRR3131007					SRX1550668		RNA-Seq	cDNA		SINGLE			ILLUMINA		SRP069011	PRJNA310107	27259150	310107	SRS1267377	SAMN04446351			Homo sapiens	GSM2049900	GEO	SRA342556	6	2016	Goodarzi	MDA-parental	MDA-ctrl-RPF-rep2-readlane1	RFP	2	WT	chx			breast	MDA		lane1	TRUE		HÃ…KON	RFP_NA_2_NA_breast_MDA_WT_NA_lane1_chx	FALSE	0.313894	0.0910613
PRJNA275386	SRR1803176					SRX876753		OTHER	other		SINGLE			ILLUMINA		SRP055009	PRJNA275386	26297486	275386	SRS845392	SAMN03344055			Homo sapiens	GSM1609407	GEO	SRA241011	2	2015	Cenik	EBV-transformed lymphoblastoid cells	GM19098_Rep2	RFP	2		chx			bone	LCL		GM19098	TRUE		KORNEL	RFP_NA_2_NA_bone_LCL_NA_NA_GM19098_chx	FALSE	0.313701	0.0773453
PRJNA478455	SRR7451189					SRX4321699	D17-4828	OTHER	RT-PCR		SINGLE			ILLUMINA		SRP151602	PRJNA478455	30466063	478455	SRS3484166	SAMN09516445			Homo sapiens	RE30-2	MASSACHUSETTS INSTITUTE OF TECHNOLOGY	SRA730597	6	2018	Rothenberg		RFP_EGF_30_min_Rep_2	RFP	2		chx		30m	breast	MCF10A		EGF	TRUE		TESHOME	RFP_NA_2_30m_breast_MCF10A_NA_NA_EGF_chx	FALSE	0.313495	0.815012
PRJNA729461	SRR14510084	40011718	996499515	24	438	SRX10855897		OTHER	other	TRANSCRIPTOMIC	SINGLE	0	0	ILLUMINA	Illumina NovaSeq 6000	SRP319472	PRJNA729461	34226921		SRS8951528	SAMN19116433	simple	9606	Homo sapiens	GSM5291928	GEO	SRA1231346	7	2021	Ichihara	HEK293T cells	si control HEK293T Ribo-seq replicate 1	RFP	1	WT				kidney	HEK293		auto_2788	TRUE		auto	RFP_NA_1_NA_kidney_HEK293_WT_NA_auto_2788_NA	FALSE	0.313363	0.206723
PRJNA278390	SRR1916544					SRX957353		RNA-Seq	cDNA		SINGLE			ILLUMINA		SRP056200	PRJNA278390	26538417	278390	SRS874708	SAMN03418225			Homo sapiens	GSM1634445	GEO	SRA246838	11	2015	Elkon	U2OS, control	C.rp.rep2.lane1	RFP	2	WT	chx	1		bone	U2OS			TRUE		KORNEL	RFP_1_2_NA_bone_U2OS_WT_NA_NA_chx	FALSE	0.313003	0.449073
PRJNA414611	SRR6181571					SRX3292097		OTHER	other		SINGLE			ILLUMINA		SRP120157	PRJNA414611	30591072	414611	SRS2601276	SAMN07795676			Homo sapiens	GSM2817688	GEO	SRA620345	4	2018	Murat	ATCC Cell Lines	RPF_DHX9_2	RFP	2		chx	4		ovary	HeLa		DHX9	TRUE		TESHOME	RFP_4_2_NA_ovary_HeLa_NA_NA_DHX9_chx	FALSE	0.312919	0.571104
PRJNA414611	SRR6181543					SRX3292090		OTHER	other		SINGLE			ILLUMINA		SRP120157	PRJNA414611	30591072	414611	SRS2601269	SAMN07795657			Homo sapiens	GSM2817681	GEO	SRA620345	4	2018	Murat	ATCC Cell Lines	RPF_sc_2	RFP	2		chx	2		ovary	HeLa		sc	TRUE		TESHOME	RFP_2_2_NA_ovary_HeLa_NA_NA_sc_chx	FALSE	0.31278	0.230048
PRJNA512837	SRR8392712	122158001	8987133310	73	3862	SRX5202423		RNA-Seq	cDNA	TRANSCRIPTOMIC	SINGLE	0	0	ILLUMINA	Illumina HiSeq 2000	SRP175158	PRJNA512837	33257563		SRS4207574	SAMN10689168	simple	9606	Homo sapiens	GSM3537597	GEO	SRA830119	12	2020	Sabath	WI38 cells	Senescent_HS2_Ribo_Seq	RFP	1								auto_1257	TRUE		auto	RFP_NA_1_NA_NA_NA_NA_NA_auto_1257_NA	FALSE	0.31263	0.182747
PRJNA707431	SRR13884591	69696576	2228992868	31	973	SRX10264912		OTHER	other	TRANSCRIPTOMIC	SINGLE	0	0	ILLUMINA	Illumina NovaSeq 6000	SRP309704	PRJNA707431	35137207		SRS8398540	SAMN18205140	simple	9606	Homo sapiens	GSM5140314	GEO	SRA1203922	7	2021	Luan	Cell line:A549	siS13.Riboseq	RFP	1					lung	A549		auto_2661	TRUE		auto	RFP_NA_1_NA_lung_A549_NA_NA_auto_2661_NA	FALSE	0.312543	0.915405
PRJNA275386	SRR1803152					SRX876729		OTHER	other		SINGLE			ILLUMINA		SRP055009	PRJNA275386	26297486	275386	SRS845418	SAMN03344010			Homo sapiens	GSM1609383	GEO	SRA241011	2	2015	Cenik	EBV-transformed lymphoblastoid cells	GM12891_Rep2	RFP	2		chx			bone	LCL		GM12891	TRUE		KORNEL	RFP_NA_2_NA_bone_LCL_NA_NA_GM12891_chx	FALSE	0.312307	0.0500275
PRJNA727298	SRR14421811					SRX10773169		OTHER	other		SINGLE			ILLUMINA		SRP318452	PRJNA727298	34107246	727298	SRS8861851	SAMN19014964			Homo sapiens	GSM5281844	GEO	SRA1228234	6	2021	Wu	HEK293 cells	HEK293 si-Control Thapsigargin rep1	RFP	1	WT	chx			kidney	HEK293		thaps	TRUE		PREETI	RFP_NA_1_NA_kidney_HEK293_WT_NA_thaps_chx	FALSE	0.312268	0.118963
PRJNA272597	SRR1758413					SRX842663		RNA-Seq	cDNA		SINGLE			ILLUMINA		SRP052229	PRJNA272597	26729373	272597	SRS818837	SAMN03284294			Homo sapiens	GSM1585245	GEO	SRA231648	1	2016	Xu	Human fibroblast	12_mut l-leucine rep3 RPF	RFP	3	MUT	chx	2		fibroblast	NONE		lLeucine	TRUE		KORNEL	RFP_2_3_NA_fibroblast_NONE_MUT_NA_lLeucine_chx	FALSE	0.31223	0.0605369
PRJNA256317	SRR1528680					SRX663291		OTHER	other		SINGLE			ILLUMINA		SRP044936	PRJNA256317	28274951	256317	SRS668164	SAMN02943062			Homo sapiens	GSM1446870	GEO	SRA176907	7	2017	Loayza-Puch	U2OS control batch7 RP	U2OS control batch7 RP	RFP	1	WT	chx	7		bone	U2OS			TRUE		HÃ…KON	RFP_7_1_NA_bone_U2OS_WT_NA_NA_chx	FALSE	0.31189	0.374183
PRJNA630716	SRR12216754					SRX8727232		RNA-Seq	cDNA		SINGLE			ILLUMINA		SRP260279	PRJNA630716	32906143	630716	SRS7001898	SAMN15526204			Homo sapiens	GSM4670767	GEO	SRA1072683	9	2020	Finkel	Calu 3 cells, ATCC HTB-55	fp_harr_07hr_2	RFP	2		harr		7h	lung	Calu3			TRUE		PREETI	RFP_NA_2_7h_lung_Calu3_NA_NA_NA_harr	FALSE	0.311688	0.0888161
PRJNA664116	SRR12660874	64758701	1972761029	30	900	SRX9141926		OTHER	other	TRANSCRIPTOMIC	SINGLE	0	0	ILLUMINA	NextSeq 500	SRP282906	PRJNA664116	34615539		SRS7383238	SAMN16198229	simple	9606	Homo sapiens	GSM4793173	GEO	SRA1127134	8	2021	Gillen	HEK293 cells	Ribo-Seq siCNOT1 Replicate 3	RFP	3					kidney	HEK293			TRUE		auto	RFP_NA_3_NA_kidney_HEK293_NA_NA_NA_NA	FALSE	0.311441	0.338512
PRJNA731473	SRR14602122	120963907	6048195350	50	1937	SRX10947890		OTHER	other	TRANSCRIPTOMIC	SINGLE	0	0	ILLUMINA	Illumina NovaSeq 6000	SRP320668	PRJNA731473	34850942		SRS9026794	SAMN19285890	simple	9606	Homo sapiens	GSM5325965	GEO	SRA1234831	3	2022	Del	control HEK293T cells, Riboseq/ILMN	HEK_Hneg_ILMN	RFP	1					kidney	HEK293			TRUE		auto	RFP_NA_1_NA_kidney_HEK293_NA_NA_NA_NA	FALSE	0.310672	0.19276
PRJNA667952	SRR12790146	36632586	1794996714	49	1032	SRX9259301		OTHER	other	TRANSCRIPTOMIC	SINGLE	0	0	ILLUMINA	Illumina HiSeq 2500	SRP286677	PRJNA667952	33597240		SRS7490394	SAMN16392787	simple	9606	Homo sapiens	GSM4822832	GEO	SRA1140064	12	2020	Dong	Human embryonic kidney cells	Ribo_seq_OE_FTO_rep1	RFP	1	OE				kidney			auto_2402	TRUE		auto	RFP_NA_1_NA_kidney_NA_OE_NA_auto_2402_NA	FALSE	0.310624	0.159452
PRJNA275386	SRR1803159					SRX876736		OTHER	other		SINGLE			ILLUMINA		SRP055009	PRJNA275386	26297486	275386	SRS845413	SAMN03344030			Homo sapiens	GSM1609390	GEO	SRA241011	2	2015	Cenik	EBV-transformed lymphoblastoid cells	GM18501_Rep2	RFP	2		chx			bone	LCL		GM18501	TRUE		KORNEL	RFP_NA_2_NA_bone_LCL_NA_NA_GM18501_chx	FALSE	0.309415	0.0711559
PRJNA599943	SRR10850874					SRX7521417		RNA-Seq	cDNA		SINGLE			ILLUMINA		SRP240357	PRJNA599943	32807779	599943	SRS5961025	SAMN13762538			Homo sapiens	GSM4256668	GEO	SRA1022253	6	2020	Karousis	ABCE1 KD 01 - riboseq	AK1_M (L7)	RFP	1	KD	frozen			ovary	HeLa		L7	TRUE		PREETI	RFP_NA_1_NA_ovary_HeLa_KD_NA_L7_frozen	FALSE	0.309359	0.319638
PRJNA591625	SRR10530148					SRX7214149		OTHER	other		SINGLE			ILLUMINA		SRP233222	PRJNA591625	33330931	591625	SRS5716952	SAMN13385767			Homo sapiens	GSM4192124	GEO	SRA1002630	11	2020	Selmi	human embryonic stem cells	H9.WTc.3.1_Ribo-seq	RFP	1	WT	chx	3		embryonic	H9		1	TRUE		PREETI	RFP_3_1_NA_embryonic_H9_WT_NA_1_chx	FALSE	0.309301	0.0527698
PRJNA556704	SRR9839462					SRX6594279		OTHER	other		SINGLE			ILLUMINA		SRP216422	PRJNA556704	31791371	556704	SRS5159349	SAMN12365723			Homo sapiens	GSM3954922	GEO	SRA927081	10	2019	Wilczynska	HEK293 cells	RPF_Control_rep3	RFP	3	WT	chx			kidney	HEK293			TRUE		PREETI	RFP_NA_3_NA_kidney_HEK293_WT_NA_NA_chx	FALSE	0.309285	0.858956
PRJNA398585	SRR5937640					SRX3097574		OTHER	other		SINGLE			ILLUMINA		SRP115648	PRJNA398585	30595437	398585	SRS2437024	SAMN07513440			Homo sapiens	GSM2743733	GEO	SRA599668	1	2019	Iwasaki	HEK293T-REx	ribo_naive_DMSO_rep1	RFP	1	naive	chx			kidney	HEK293		dmso	TRUE		TESHOME	RFP_NA_1_NA_kidney_HEK293_naive_NA_dmso_chx	FALSE	0.309118	0.646122
PRJNA727298	SRR14421806					SRX10773164		OTHER	other		SINGLE			ILLUMINA		SRP318452	PRJNA727298	34107246	727298	SRS8861638	SAMN19014969			Homo sapiens	GSM5281839	GEO	SRA1228234	6	2021	Wu	HEK293 cells	HEK293 si-Hsp70L1 DMSO rep2	RFP	2	KD	chx			kidney	HEK293	HSP70	dmso	TRUE		PREETI	RFP_NA_2_NA_kidney_HEK293_KD_HSP70_dmso_chx	FALSE	0.308814	0.0770601
PRJNA756018	SRR15513158	68655478	2412619089	35	977	SRX11811952		RNA-Seq	cDNA	TRANSCRIPTOMIC	SINGLE	0	0	ILLUMINA	NextSeq 500	SRP333128	PRJNA756018	35841888		SRS9826470	SAMN20849943	simple	9606	Homo sapiens	GSM5527683	GEO	SRA1280330	7	2022	Chothani	untreated human embryonic stem cells	ES_6 (RiboSeq)	RFP	1								auto_2979	TRUE		auto	RFP_NA_1_NA_NA_NA_NA_NA_auto_2979_NA	FALSE	0.308755	0.16119
PRJNA664116	SRR12660882	84765053	6442144028	76	2199	SRX9141934		OTHER	other	TRANSCRIPTOMIC	SINGLE	0	0	ILLUMINA	NextSeq 500	SRP282906	PRJNA664116	34615539		SRS7383246	SAMN16198221	simple	9606	Homo sapiens	GSM4793181	GEO	SRA1127134	8	2021	Gillen	HEK293 cells	Ribo-Seq RPF_Control_rep3	RFP	3	WT				kidney	HEK293			TRUE		auto	RFP_NA_3_NA_kidney_HEK293_WT_NA_NA_NA	FALSE	0.308407	0.812774
PRJNA256319	SRR1528656					SRX663273		OTHER	other		SINGLE			ILLUMINA		SRP044934	PRJNA256319	28274951	256319	SRS668145	SAMN02943074			Homo sapiens	GSM1446852	GEO	SRA176905	7	2017	Loayza-Puch	MCF10A control 1 batch2 RP	MCF10A control 1 batch2 RP	RFP	1	WT	chx	2		breast	MCF10A			TRUE		HÃ…KON	RFP_2_1_NA_breast_MCF10A_WT_NA_NA_chx	FALSE	0.308348	0.31905
PRJNA556267	SRR9737077	32638895	2480556020	76	875	SRX6494023		OTHER	other	TRANSCRIPTOMIC	SINGLE	0	0	ILLUMINA	NextSeq 500	SRP216083	PRJNA556267	32348767		SRS5142592	SAMN12346079	simple	9606	Homo sapiens	GSM3966956	GEO	SRA925389	1	2020	Groenke	Transfected HEK 293T cells	Ribosome profiling from 27wt/72Lmax/27min (pilot experiment)	RFP		WT				kidney	HEK293			TRUE		auto	RFP_NA_NA_NA_kidney_HEK293_WT_NA_NA_NA	FALSE	0.307936	0.154963
PRJNA263582	SRR2086030					SRX1080129		OTHER	other		SINGLE			ILLUMINA		SRP048825	PRJNA263582	26399832	263582	SRS977991	SAMN03838481			Homo sapiens	GSM1782879	GEO	SRA189363	9	2015	Werner	hES cell, treated with sh targeting KBTBD8, ND 3d	ribo_ND3_shKBTBD8	RFP		KO	chx	5	3d	embryonic	H1		KBTBD8	TRUE		KORNEL	RFP_5_NA_3d_embryonic_H1_KO_NA_KBTBD8_chx	FALSE	0.307511	0.0440893
PRJNA513305	SRR8404140					SRX5213373		OTHER	other		SINGLE			ILLUMINA		SRP176433	PRJNA513305		513305	SRS4217445	SAMN10700557			Homo sapiens	GSM3544717	GEO	SRA831600	1	2020	Wu	HEK293T cells_-NAEK	HEK293T cells_-NAEK_rpt1 (Ribo-seq)	RFP	1	WT	chx			kidney	HEK293		low	TRUE		TESHOME	RFP_NA_1_NA_kidney_HEK293_WT_NA_low_chx	FALSE	0.30727	0.193865
PRJNA453915	SRR7073140					SRX4003588		RNA-Seq	cDNA		SINGLE			ILLUMINA		SRP143452	PRJNA453915	30029003	453915	SRS3225390	SAMN08993029			Homo sapiens	GSM3118947	GEO	SRA696853	7	2018	Darnell	HEK293T cells, ATCC CRL-3216 + AAVS1:Flag-RagB-Q99L	293t_ragbq99l_arg_3h	RFP			chx		3h	kidney	HEK293		ragbq99l_arg	TRUE		TESHOME	RFP_NA_NA_3h_kidney_HEK293_NA_NA_ragbq99l_arg_chx	FALSE	0.307246	0.0369692
PRJNA263582	SRR2086028					SRX1080127		OTHER	other		SINGLE			ILLUMINA		SRP048825	PRJNA263582	26399832	263582	SRS977993	SAMN03838479			Homo sapiens	GSM1782877	GEO	SRA189363	9	2015	Werner	hES cell, treated with sh targeting TCOF1	ribo_hES_shTCOF1	RFP		KO	chx	5		embryonic	H1		TCOF1	TRUE		KORNEL	RFP_5_NA_NA_embryonic_H1_KO_NA_TCOF1_chx	FALSE	0.306671	0.127404
PRJNA300627	SRR2873530					SRX1402243		OTHER	other		SINGLE			ILLUMINA		SRP065528	PRJNA300627	26878238	300627	SRS1141530	SAMN04226644			Homo sapiens	GSM1921989	GEO	SRA308231	2	2016	Loayza-Puch	PC3 cell line	PC3 control batch1 RP	RFP	1	WT	chx	1		prostate	PC3			TRUE		KORNEL	RFP_1_1_NA_prostate_PC3_WT_NA_NA_chx	FALSE	0.306352	0.845834
PRJNA749053	SRR15217946	22069557	1456590762	66	449	SRX11523897		OTHER	other	TRANSCRIPTOMIC	SINGLE	0	0	ILLUMINA	Illumina HiSeq 4000	SRP329509	PRJNA749053	34535544		SRS9561263	SAMN20351317	simple	9606	Homo sapiens	GSM5467444	GEO	SRA1263336	11	2021	Venkataramanan	HCT-116 with DDX3X degron, lentiDDX3X, auxin treated, ribosome profiling	HCT-116 cells with DDX3X degron, lentiDDX3X, auxin treated, ribosome profiling, replicate 2	RFP	2								auxin	TRUE		auto	RFP_NA_2_NA_NA_NA_NA_NA_auxin_NA	FALSE	0.306166	0.0230173
PRJNA513305	SRR8404139					SRX5213372		OTHER	other		SINGLE			ILLUMINA		SRP176433	PRJNA513305		513305	SRS4217443	SAMN10700558			Homo sapiens	GSM3544716	GEO	SRA831600	1	2020	Wu	HEK293T cells_+NAEK	HEK293T cells_+NAEK_rpt2 (Ribo-seq)	RFP	2	WT	chx			kidney	HEK293		high	TRUE		TESHOME	RFP_NA_2_NA_kidney_HEK293_WT_NA_high_chx	FALSE	0.305085	0.195823
PRJNA256319	SRR1528654					SRX663271		OTHER	other		SINGLE			ILLUMINA		SRP044934	PRJNA256319	28274951	256319	SRS668144	SAMN02943100			Homo sapiens	GSM1446850	GEO	SRA176905	7	2017	Loayza-Puch	MCF10A control 2 batch1 RP	MCF10A control 2 batch1 RP	RFP	2	WT	chx	1		breast	MCF10A			TRUE		HÃ…KON	RFP_1_2_NA_breast_MCF10A_WT_NA_NA_chx	FALSE	0.304859	0.237663
PRJNA599943	SRR10850873					SRX7521416		RNA-Seq	cDNA		SINGLE			ILLUMINA		SRP240357	PRJNA599943	32807779	599943	SRS5961023	SAMN13762539			Homo sapiens	GSM4256667	GEO	SRA1022253	6	2020	Karousis	CTRL KD 03 - riboseq	SK3_M (L7)	RFP	3	WT	frozen			ovary	HeLa		L7	TRUE		PREETI	RFP_NA_3_NA_ovary_HeLa_WT_NA_L7_frozen	FALSE	0.304618	0.202223
PRJNA472636	SRR7207252					SRX4116237		OTHER	other		SINGLE			ILLUMINA		SRP148767	PRJNA472636	30089253	472636	SRS3331525	SAMN09238845			Homo sapiens	GSM3150265	GEO	SRA709715	7	2018	Gameiro	Breast epithelial cell	EtOH_Ctrl_30min.1	RFP	1	WT	chx		30m	breast	MCF10A		EtOH	TRUE		TESHOME	RFP_NA_1_30m_breast_MCF10A_WT_NA_EtOH_chx	FALSE	0.304586	0.300322
PRJNA707431	SRR13884525	94817146	3024757238	31	1529	SRX10264886		OTHER	other	TRANSCRIPTOMIC	SINGLE	0	0	ILLUMINA	Illumina NovaSeq 6000	SRP309704	PRJNA707431	35137207		SRS8398514	SAMN18205333	simple	9606	Homo sapiens	GSM5140248	GEO	SRA1203922	7	2021	Luan	Cell line:A549	siL13A.Riboseq	RFP	1					lung	A549		auto_2643	TRUE		auto	RFP_NA_1_NA_lung_A549_NA_NA_auto_2643_NA	FALSE	0.304427	0.351363
PRJNA740301	SRR14890797	19839044	1507767344	76	527	SRX11206962		OTHER	other	TRANSCRIPTOMIC	SINGLE	0	0	ILLUMINA	NextSeq 500	SRP325334	PRJNA740301	1		SRS9261344	SAMN19838091	simple	9606	Homo sapiens	GSM5397165	GEO	SRA1249860	6	2021	Makar	MB135iDUX4 myoblasts	MB135iDUX4-Ribo_00h_rep1	RFP	1				0h					TRUE		auto	RFP_NA_1_0h_NA_NA_NA_NA_NA_NA	FALSE	0.304403	0.171564
PRJNA707431	SRR13884529	113373845	3560933456	31	1530	SRX10264930		OTHER	other	TRANSCRIPTOMIC	SINGLE	0	0	ILLUMINA	Illumina NovaSeq 6000	SRP309704	PRJNA707431	35137207		SRS8398561	SAMN18205329	simple	9606	Homo sapiens	GSM5140252	GEO	SRA1203922	7	2021	Luan	Cell line:A549	siL17.Riboseq	RFP	1					lung	A549		auto_2671	TRUE		auto	RFP_NA_1_NA_lung_A549_NA_NA_auto_2671_NA	FALSE	0.3043	0.156447
PRJNA591625	SRR10530149					SRX7214149		OTHER	other		SINGLE			ILLUMINA		SRP233222	PRJNA591625	33330931	591625	SRS5716952	SAMN13385767			Homo sapiens	GSM4192124	GEO	SRA1002630	11	2020	Selmi	human embryonic stem cells	H9.WTc.3.1_Ribo-seq	RFP	1	WT	chx	3		embryonic	H9		2	TRUE		PREETI	RFP_3_1_NA_embryonic_H9_WT_NA_2_chx	FALSE	0.304237	0.0466197
PRJNA795419	SRR17481807	36702743	1835137150	50	524	SRX13652319	GSM5776307	OTHER	other	TRANSCRIPTOMIC	SINGLE	0	0	ILLUMINA	Illumina NovaSeq 6000	SRP353938	PRJNA795419	1		SRS11538499	SAMN24719590	simple	9606	Homo sapiens	GSM5776307	school of medicine, sysu	SRA1353741	2	2023	Makar	HeLa cell	U1 Ribo-seq	RFP	1					ovary	HeLa			TRUE		auto	RFP_NA_1_NA_ovary_HeLa_NA_NA_NA_NA	FALSE	0.304227	0.0146849
PRJNA453915	SRR7073124					SRX4003572		RNA-Seq	cDNA		SINGLE			ILLUMINA		SRP143452	PRJNA453915	30029003	453915	SRS3225374	SAMN08993037			Homo sapiens	GSM3118931	GEO	SRA696853	7	2018	Darnell	HEK293T cells, ATCC CRL-3216	293t_rpC_rich_3h	RFP			chx		3h	kidney	HEK293		rpC_rich	TRUE		TESHOME	RFP_NA_NA_3h_kidney_HEK293_NA_NA_rpC_rich_chx	FALSE	0.304042	0.541016
PRJNA256319	SRR1528657					SRX663274		OTHER	other		SINGLE			ILLUMINA		SRP044934	PRJNA256319	28274951	256319	SRS668147	SAMN02943075			Homo sapiens	GSM1446853	GEO	SRA176905	7	2017	Loayza-Puch	MCF10A TGFb 1 batch2 RP	MCF10A TGFb 1 batch2 RP	RFP	1		chx	2		breast	MCF10A		TGFb	TRUE		HÃ…KON	RFP_2_1_NA_breast_MCF10A_NA_NA_TGFb_chx	FALSE	0.303996	0.356026
PRJNA472636	SRR7207274					SRX4116259		OTHER	other		SINGLE			ILLUMINA		SRP148767	PRJNA472636	30089253	472636	SRS3331547	SAMN09238868			Homo sapiens	GSM3150286	GEO	SRA709715	7	2018	Gameiro	Breast epithelial cell	TAM_NoG_04hr.2	RFP	2	NoG	chx		4h	breast	MCF10A		TAM	TRUE		TESHOME	RFP_NA_2_4h_breast_MCF10A_NoG_NA_TAM_chx	FALSE	0.303944	0.0931637
PRJNA244941	SRR1257240					SRX522472		OTHER	other		SINGLE			ILLUMINA		SRP041298	PRJNA244941	26338483	244941	SRS594827	SAMN02730007			Homo sapiens	GSM1371458	GEO	SRA158793	8	2015	Jang	U2-OS Cells	WT_ribo_profile_CT06_rep2	RFP	2	WT	chx			bone	U2OS		CT06	TRUE		HÃ…KON	RFP_NA_2_NA_bone_U2OS_WT_NA_CT06_chx	FALSE	0.30351	0.478303
PRJNA727298	SRR14421818					SRX10773176		OTHER	other		SINGLE			ILLUMINA		SRP318452	PRJNA727298	34107246	727298	SRS8861858	SAMN19014957			Homo sapiens	GSM5281851	GEO	SRA1228234	6	2021	Wu	HEK293 cells	HEK293 si-Hsp70L1_si-Pelo Thapsigargin rep2	RFP	2	KD	chx			kidney	HEK293	H_P	thaps	TRUE		PREETI	RFP_NA_2_NA_kidney_HEK293_KD_H_P_thaps_chx	FALSE	0.30351	0.114512
PRJNA701951	SRR13712443	34758899	1772703849	51	604	SRX10101219		RNA-Seq	cDNA	TRANSCRIPTOMIC	SINGLE	0	0	ILLUMINA	NextSeq 500	SRP306464	PRJNA701951	35388737		SRS8258252	SAMN17918004	simple	9606	Homo sapiens	GSM5082457	GEO	SRA1196414	4	2022	Hisaoka	HCT116	TP53-KO_Ctrl_RPF_rep3	RFP	3	KO				colon	HCT116	TP53-		TRUE		auto	RFP_NA_3_NA_colon_HCT116_KO_TP53-_NA_NA	FALSE	0.303507	0.26096
PRJNA515538	SRR8449572	132296016	6747096816	51	2204	SRX5256550		OTHER	other	TRANSCRIPTOMIC	SINGLE	0	0	ILLUMINA	Illumina HiSeq 2500	SRP179798	PRJNA515538	31819274		SRS4258056	SAMN10760877	simple	9606	Homo sapiens	GSM3566403	GEO	SRA835486	7	2019	Martinez	HEK293T (Human Embryonic Kidney)	293T_Ribo_TM_rep2	RFP	2					kidney	HEK293			TRUE		auto	RFP_NA_2_NA_kidney_HEK293_NA_NA_NA_NA	FALSE	0.303382	0.126679
PRJNA278390	SRR1916545					SRX957354		RNA-Seq	cDNA		SINGLE			ILLUMINA		SRP056200	PRJNA278390	26538417	278390	SRS874701	SAMN03418226			Homo sapiens	GSM1634446	GEO	SRA246838	11	2015	Elkon	U2OS, control	C.rp.rep2.lane2	RFP	2	WT	chx	2		bone	U2OS			TRUE		KORNEL	RFP_2_2_NA_bone_U2OS_WT_NA_NA_chx	FALSE	0.30325	0.307662
PRJNA854905	SRR19918535	13547325	677366250	50	334	SRX15961072	GSM6284788	OTHER	other	TRANSCRIPTOMIC	SINGLE	0	0	ILLUMINA	Illumina HiSeq 2500	SRP384536	PRJNA854905	35891396		SRS13647414	SAMN29472420	simple	9606	Homo sapiens	GSM6284788	Kamini Singh, Molecular Pharmacology, Albert Einstein College of Medicine	SRA1447869	7	2022	Singh	primary hNPC	A3_ribo	RFP	7					throat	NPC		auto_3480	TRUE		auto	RFP_NA_7_NA_throat_NPC_NA_NA_auto_3480_NA	FALSE	0.303076	0.0866503
PRJNA707431	SRR13884540	95442755	2976337416	31	1734	SRX10264809		OTHER	other	TRANSCRIPTOMIC	SINGLE	0	0	ILLUMINA	Illumina NovaSeq 6000	SRP309704	PRJNA707431	35137207		SRS8398436	SAMN18205136	simple	9606	Homo sapiens	GSM5140263	GEO	SRA1203922	7	2021	Luan	Cell line:A549	siL26.Riboseq	RFP	1					lung	A549		auto_2610	TRUE		auto	RFP_NA_1_NA_lung_A549_NA_NA_auto_2610_NA	FALSE	0.302747	0.532252
PRJNA420695	SRR6337303					SRX3436379		OTHER	other		SINGLE			ILLUMINA		SRP125941	PRJNA420695		420695	SRS2727331	SAMN08118011			Homo sapiens	GSM2871726	GEO	SRA635339	10	2019	Wu	Transgenic cells	Transgenic cells_Ribo-seq	RFP		transgenic	chx			kidney	HEK293			TRUE		TESHOME	RFP_NA_NA_NA_kidney_HEK293_transgenic_NA_NA_chx	FALSE	0.302374	0.239104
PRJNA542670	SRR9049053					SRX5825555		OTHER	other		SINGLE			ILLUMINA		SRP198270	PRJNA542670	31284728	542670	SRS4753609	SAMN11635146			Homo sapiens	GSM3763597	GEO	SRA885795	10	2019	Chothani	Left ventricle tissue of end-stage DCM patients	Left ventricle tissue of end-stage DCM patients (20CM01195)	RFP	2		chx			heart	NONE			TRUE		TESHOME	RFP_NA_2_NA_heart_NONE_NA_NA_NA_chx	FALSE	0.302305	0.0391208
PRJNA707431	SRR13884520	132605797	4241003309	31	1845	SRX10264881		OTHER	other	TRANSCRIPTOMIC	SINGLE	0	0	ILLUMINA	Illumina NovaSeq 6000	SRP309704	PRJNA707431	35137207		SRS8398509	SAMN18205342	simple	9606	Homo sapiens	GSM5140243	GEO	SRA1203922	7	2021	Luan	Cell line:A549	siL10.Riboseq	RFP	1					lung	A549		auto_2638	TRUE		auto	RFP_NA_1_NA_lung_A549_NA_NA_auto_2638_NA	FALSE	0.302181	0.411267
PRJNA256317	SRR1528681					SRX663291		OTHER	other		SINGLE			ILLUMINA		SRP044936	PRJNA256317	28274951	256317	SRS668164	SAMN02943062			Homo sapiens	GSM1446870	GEO	SRA176907	7	2017	Loayza-Puch	U2OS control batch7 RP	U2OS control batch7 RP	RFP	2	WT	chx	7		bone	U2OS			TRUE		HÃ…KON	RFP_7_2_NA_bone_U2OS_WT_NA_NA_chx	FALSE	0.301864	0.230133
PRJNA527127	SRR8730356					SRX5523340		OTHER	other		SINGLE			ILLUMINA		SRP188457	PRJNA527127	32341360	527127	SRS4490077	SAMN11128256			Homo sapiens	GSM3671392	GEO	SRA860229	4	2020	Whisnant		RP 4 h p.i. - Lactimidomycin - Rep 2	RFP	2		ltm	2	4h	skin	HFF		infe	TRUE		TESHOME	RFP_2_2_4h_skin_HFF_NA_NA_infe_ltm	FALSE	0.301524	0.194184
PRJNA478455	SRR7451185					SRX4321703	D17-4830	OTHER	RT-PCR		SINGLE			ILLUMINA		SRP151602	PRJNA478455	30466063	478455	SRS3484170	SAMN09516447			Homo sapiens	RE90-2	MASSACHUSETTS INSTITUTE OF TECHNOLOGY	SRA730597	6	2018	Rothenberg		RFP_EGF_90_min_Rep_2	RFP	2		chx		90m	breast	MCF10A		EGF	TRUE		TESHOME	RFP_NA_2_90m_breast_MCF10A_NA_NA_EGF_chx	FALSE	0.301334	0.923256
PRJNA541324	SRR9019685	52411879	6551484875	125	3628	SRX5797781		RNA-Seq	cDNA	TRANSCRIPTOMIC	SINGLE	0	0	ILLUMINA	Illumina HiSeq 2000	SRP195632	PRJNA541324	31944153		SRS4728925	SAMN11583004	simple	9606	Homo sapiens	GSM3753503	GEO	SRA883373	1	2020	Lyabin	Human embryonic kidney	Ribo-Seq wt (RP_wt), run 3	RFP	3	WT				kidney				TRUE		auto	RFP_NA_3_NA_kidney_NA_WT_NA_NA_NA	FALSE	0.301086	0.230378
PRJNA501880	SRR8136739					SRX4957714		OTHER	other		SINGLE			ILLUMINA		SRP167245	PRJNA501880	30875366	501880	SRS3997744	SAMN10348614			Homo sapiens	GSM3452612	GEO	SRA800863	1	2019	Liaud	Huh7_1.5 ÂµM PF-067446846for 1 hr	1.5 ÂµM PF-067446846, 1 hr, rep 3	RFP	3	PF846	chx			liver	Huh7			TRUE		TESHOME	RFP_NA_3_NA_liver_Huh7_PF846_NA_NA_chx	FALSE	0.30098	0.178454
PRJNA701951	SRR13712441	34916690	1780751190	51	607	SRX10101217		RNA-Seq	cDNA	TRANSCRIPTOMIC	SINGLE	0	0	ILLUMINA	NextSeq 500	SRP306464	PRJNA701951	35388737		SRS8258249	SAMN17918006	simple	9606	Homo sapiens	GSM5082455	GEO	SRA1196414	4	2022	Hisaoka	HCT116	WT_NCS_RPF_rep3	RFP	3	WT				colon	HCT116		auto_2556	TRUE		auto	RFP_NA_3_NA_colon_HCT116_WT_NA_auto_2556_NA	FALSE	0.300831	0.139787
PRJNA870413	SRR21102201	112414841	5733156891	51	2509	SRX17115753	GSM6470174	OTHER	other	TRANSCRIPTOMIC	SINGLE	0	0	ILLUMINA	NextSeq 550	SRP392653	PRJNA870413	1		SRS14689930	SAMN30370416	simple	9606	Homo sapiens	GSM6470174	AG Teleman, B140, DKFZ	SRA1519790	2	2023	Makar	HeLa	R1_80S_siGFP	RFP	1	KO				ovary	HeLa	GFP		TRUE		HÃ¥kon	RFP_NA_1_NA_ovary_HeLa_KO_GFP_NA_NA	FALSE	0.300686	0.654248
PRJNA707431	SRR13884571	69435350	2242241685	32	1064	SRX10264816		OTHER	other	TRANSCRIPTOMIC	SINGLE	0	0	ILLUMINA	Illumina NovaSeq 6000	SRP309704	PRJNA707431	35137207		SRS8398444	SAMN18205095	simple	9606	Homo sapiens	GSM5140294	GEO	SRA1203922	7	2021	Luan	Cell line:A549	siS2.Riboseq	RFP	1					lung	A549		auto_2617	TRUE		auto	RFP_NA_1_NA_lung_A549_NA_NA_auto_2617_NA	FALSE	0.300638	0.494438
PRJNA599943	SRR10850868					SRX7521411		RNA-Seq	cDNA		SINGLE			ILLUMINA		SRP240357	PRJNA599943	32807779	599943	SRS5961019	SAMN13762549			Homo sapiens	GSM4256662	GEO	SRA1022253	6	2020	Karousis	ABCE1 KD 01 - riboseq	AK1_M (L6)	RFP	1	KD	frozen			ovary	HeLa		L6	TRUE		PREETI	RFP_NA_1_NA_ovary_HeLa_KD_NA_L6_frozen	FALSE	0.299885	0.352477
PRJNA727298	SRR14421808					SRX10773166		OTHER	other		SINGLE			ILLUMINA		SRP318452	PRJNA727298	34107246	727298	SRS8861639	SAMN19014967			Homo sapiens	GSM5281841	GEO	SRA1228234	6	2021	Wu	HEK293 cells	HEK293 si-Pelo DMSO rep2	RFP	2	KD	chx			kidney	HEK293	PELO	dmso	TRUE		PREETI	RFP_NA_2_NA_kidney_HEK293_KD_PELO_dmso_chx	FALSE	0.299625	0.144145
PRJNA740301	SRR14890801	9447570	718015320	76	256	SRX11206954		OTHER	other	TRANSCRIPTOMIC	SINGLE	0	0	ILLUMINA	NextSeq 500	SRP325334	PRJNA740301	1		SRS9261336	SAMN19838087	simple	9606	Homo sapiens	GSM5397169	GEO	SRA1249860	6	2021	Makar	MB135iDUX4 myoblasts	MB135iDUX4-Ribo_04h_rep2	RFP	2				4h					TRUE		auto	RFP_NA_2_4h_NA_NA_NA_NA_NA_NA	FALSE	0.299229	0.0338543
PRJNA667051	SRR15324715	37838340	1132151758	29	504	SRX11629094		OTHER	other	TRANSCRIPTOMIC	SINGLE	0	0	ILLUMINA	NextSeq 500	SRP286182	PRJNA667051	35604092		SRS9662995	SAMN20521104	simple	9606	Homo sapiens	GSM5494615	GEO	SRA1137052	8	2021	Puray-Chavez	Primary human bronchial epithelial cells	Ribo-seq-HBEC-mock-4hp-rep2	RFP	2								auto_2376	TRUE		auto	RFP_NA_2_NA_NA_NA_NA_NA_auto_2376_NA	FALSE	0.299229	0.0205159
PRJNA171327	SRR964946					SRX344414	HEK293_Harringtonine	RNA-Seq	size fractionation		SINGLE			ILLUMINA		SRP014629	PRJNA171327	23290916	171327	SRS476344	SAMN02343838			Homo sapiens	HEK293_Harringtonine	CORNELL	SRA056377	9	2013	Liu		HEK293_Harringtonine	RFP			harr			kidney	HEK293			TRUE		HÃ…KON	RFP_NA_NA_NA_kidney_HEK293_NA_NA_NA_harr	FALSE	0.299229	0.029221
PRJNA275386	SRR1803164					SRX876741		OTHER	other		SINGLE			ILLUMINA		SRP055009	PRJNA275386	26297486	275386	SRS845405	SAMN03344042			Homo sapiens	GSM1609395	GEO	SRA241011	2	2015	Cenik	EBV-transformed lymphoblastoid cells	GM18511_Rep1	RFP	1		chx			bone	LCL		GM18511	TRUE		KORNEL	RFP_NA_1_NA_bone_LCL_NA_NA_GM18511_chx	FALSE	0.299229	0.0482831
PRJNA477831	SRR7883753					SRX4721984		OTHER	other		SINGLE			ILLUMINA		SRP151279	PRJNA477831	30590705	477831	SRS3807069	SAMN10097083			Homo sapiens	GSM3396995	GEO	SRA728057	3	2019	Liu	iPSC	qc_sample_ipsc6_low_rnase	RFP	6	low	chx			embryonic	iPSC			TRUE		TESHOME	RFP_NA_6_NA_embryonic_iPSC_low_NA_NA_chx	FALSE	0.299229	0.0152868
PRJNA854905	SRR19918540	25732327	1286616350	50	619	SRX15961066	GSM6284786	OTHER	other	TRANSCRIPTOMIC	SINGLE	0	0	ILLUMINA	Illumina HiSeq 2500	SRP384536	PRJNA854905	35891396		SRS13647408	SAMN29472422	simple	9606	Homo sapiens	GSM6284786	Kamini Singh, Molecular Pharmacology, Albert Einstein College of Medicine	SRA1447869	7	2022	Singh	primary hNPC	A2_ribo	RFP	4					throat	NPC		auto_3453	TRUE		auto	RFP_NA_4_NA_throat_NPC_NA_NA_auto_3453_NA	FALSE	0.299229	0.0318097
PRJNA601135	SRR10883798					SRX7552799		OTHER	other		SINGLE			ILLUMINA		SRP241899	PRJNA601135	32029688	601135	SRS5990223	SAMN13842334			Homo sapiens	GSM4263929	GEO	SRA1026011	2	2020	Ebright	circulating tumor cell - derived cell line	RPL15_overexpressing_BRx142_batch2	RFP	3	OE	chx	2		blood	CTC			TRUE		PREETI	RFP_2_3_NA_blood_CTC_OE_NA_NA_chx	FALSE	0.299229	0.0292385
PRJNA660002	SRR12540275					SRX9029934		OTHER	other		SINGLE			ILLUMINA		SRP279211	PRJNA660002	33905506	660002	SRS7281239	SAMN15932198			Homo sapiens	GSM4751863	GEO	SRA1118483	10	2020	Venkataramanan	Colonic carcinoma	HCT-116 cells with DDX3X degron, auxin treated, DDX3Y transfected, ribosome profiling, replicate 1	RFP	1	OE_DDX3Y	chx			colon	HCT116		auxin	TRUE		PREETI	RFP_NA_1_NA_colon_HCT116_OE_DDX3Y_NA_auxin_chx	FALSE	0.299229	0.0220351
PRJNA256316	SRR1528689					SRX663296		OTHER	other		SINGLE			ILLUMINA		SRP044937	PRJNA256316	26878238	256316	SRS668169	SAMN02943068			Homo sapiens	GSM1446875	GEO	SRA176910	2	2016	Loayza-Puch	Kidney normal tissue 2 RP	Kidney normal tissue 2 RP	RFP	2	WT	chx	2		kidney	NONE			TRUE		HÃ…KON	RFP_2_2_NA_kidney_NONE_WT_NA_NA_chx	FALSE	0.299229	0.0617394
PRJNA310107	SRR3131008					SRX1550669		RNA-Seq	cDNA		SINGLE			ILLUMINA		SRP069011	PRJNA310107	27259150	310107	SRS1267376	SAMN04446352			Homo sapiens	GSM2049902	GEO	SRA342556	6	2016	Goodarzi	MDA-parental	MDA-ctrl-RPF-rep2-readlane2	RFP	2	WT	chx			breast	MDA		lane2	TRUE		HÃ…KON	RFP_NA_2_NA_breast_MDA_WT_NA_lane2_chx	FALSE	0.299229	0.127736
PRJNA257365	SRR1535534					SRX668708		RNA-Seq	cDNA		SINGLE			ILLUMINA		SRP045214	PRJNA257365	25989971	257365	SRS673071	SAMN02950958			Homo sapiens	GSM1464101	GEO	SRA177782	7	2015	Rutkowski	Ribosome profiling	RP mock - Rep 2	RFP	1	WT	chx	2		skin	NONE			TRUE		HÃ…KON	RFP_2_1_NA_skin_NONE_WT_NA_NA_chx	FALSE	0.299229	0.0343394
PRJNA223060	SRR1562540					SRX690807		OTHER	other		SINGLE			ILLUMINA		SRP031501	PRJNA223060	25122893	223060	SRS693280	SAMN03015186			Homo sapiens	GSM1495245	GEO	SRA107313	9	2014	Gonzalez	normal brain	NormalHumanRiboProfilingB	RFP	2	WT	chx			brain	NONE			TRUE		HÃ…KON	RFP_NA_2_NA_brain_NONE_WT_NA_NA_chx	FALSE	0.298996	0.211898
PRJNA218051	SRR970588					SRX345310		RNA-Seq	size fractionation		SINGLE			ILLUMINA		SRP029589	PRJNA218051	24120665	218051	SRS476849	SAMN02344702			Homo sapiens	Hela Mitosis RP CS11	UNIVERSITY OF CALIFORNIA SAN FRANCISCO	SRA099816	7	2015	Stumpf		Mitotic hela RP 2	RFP	2	miotic	chx			ovary	HeLa			TRUE		HÃ…KON	RFP_NA_2_NA_ovary_HeLa_miotic_NA_NA_chx	FALSE	0.298977	0.574292
PRJNA287137	SRR2064453					SRX1059915		OTHER	other		SINGLE			ILLUMINA		SRP059548	PRJNA287137	26878238	287137	SRS962194	SAMN03776758			Homo sapiens	GSM1712847	GEO	SRA273145	2	2016	Loayza-Puch	MCF7 cell line	MCF7 Glutamine starvation batch7 RP	RFP	1	starvation	chx			breast	MCF7			TRUE		KORNEL	RFP_NA_1_NA_breast_MCF7_starvation_NA_NA_chx	FALSE	0.29894	0.316451
PRJNA182756	SRR627627					SRX207952		OTHER	other		SINGLE			ILLUMINA		SRP017378	PRJNA182756	23594524	182756	SRS377853	SAMN01821863			Homo sapiens	GSM1047591	GEO	SRA062117	3	2013	Loayza-Puch	Immortalized primary fibroblasts	Tr.rp	RFP		Tr	chx			skin	BJ		RASG12V	TRUE		HÃ…KON	RFP_NA_NA_NA_skin_BJ_Tr_NA_RASG12V_chx	FALSE	0.298282	0.145816
PRJNA532643	SRR8891627					SRX5676974		OTHER	other		SINGLE			ILLUMINA		SRP192442	PRJNA532643	32522993	532643	SRS4618351	SAMN11408160			Homo sapiens	GSM3721665	GEO	SRA873611	4	2020	Reich	LN308 cell line	LN308-2h-Tunicamycin-AGGAAT-R3 (Ribo-Seq)	RFP	3		chx		2h	brain	LN308		Tuni	TRUE		TESHOME	RFP_NA_3_2h_brain_LN308_NA_NA_Tuni_chx	FALSE	0.298136	0.177122
PRJNA275305	SRR1802137					SRX876054		OTHER	other		SINGLE			ILLUMINA		SRP054971	PRJNA275305	26900662	275305	SRS844815	SAMN03342122			Homo sapiens	GSM1608276	GEO	SRA240809	11	2015	Ji	Breast epithelial cell	ERSrcEtOH01hr_chx_rep2	RFP	2	KO	chx		1hr	breast	NONE		ER_SrcEtOH	TRUE		KORNEL	RFP_NA_2_1hr_breast_NONE_KO_NA_ER_SrcEtOH_chx	FALSE	0.297583	0.146195
PRJNA707431	SRR13884602	61958046	1955778764	31	936	SRX10264939		OTHER	other	TRANSCRIPTOMIC	SINGLE	0	0	ILLUMINA	Illumina NovaSeq 6000	SRP309704	PRJNA707431	35137207		SRS8398571	SAMN18205209	simple	9606	Homo sapiens	GSM5140325	GEO	SRA1203922	7	2021	Luan	Cell line:A549	siS19.Riboseq	RFP	1					lung	A549		auto_2680	TRUE		auto	RFP_NA_1_NA_lung_A549_NA_NA_auto_2680_NA	FALSE	0.296951	0.469212
PRJNA453915	SRR7073137					SRX4003585		RNA-Seq	cDNA		SINGLE			ILLUMINA		SRP143452	PRJNA453915	30029003	453915	SRS3225387	SAMN08993032			Homo sapiens	GSM3118944	GEO	SRA696853	7	2018	Darnell	HEK293T cells, ATCC CRL-3216 + AAVS1:Flag-RagB-WT	293t_ragbwt_arg_3h	RFP		WT	chx		3h	kidney	HEK293		ragbwt_arg	TRUE		TESHOME	RFP_NA_NA_3h_kidney_HEK293_WT_NA_ragbwt_arg_chx	FALSE	0.296859	0.0890756
PRJNA707431	SRR13884611	54534167	1718320647	31	845	SRX10264948		OTHER	other	TRANSCRIPTOMIC	SINGLE	0	0	ILLUMINA	Illumina NovaSeq 6000	SRP309704	PRJNA707431	35137207		SRS8398579	SAMN18205180	simple	9606	Homo sapiens	GSM5140334	GEO	SRA1203922	7	2021	Luan	Cell line:A549	siS28.Riboseq	RFP	1					lung	A549		auto_2689	TRUE		auto	RFP_NA_1_NA_lung_A549_NA_NA_auto_2689_NA	FALSE	0.296744	0.354179
PRJNA532532	SRR8887172	54304688	2715234400	50	1547	SRX5672899		OTHER	other	TRANSCRIPTOMIC	SINGLE	0	0	ILLUMINA	Illumina HiSeq 2500	SRP192310	PRJNA532532	32320655		SRS4615542	SAMN11403215	simple	9606	Homo sapiens	GSM3720427	GEO	SRA873063	4	2020	Ma	Ribosome_profiling_A2780cis_vehicle	Ribosome_profiling_A2780cis_vehicle	RFP	1					ovary	A2780		auto_1341	TRUE		auto	RFP_NA_1_NA_ovary_A2780_NA_NA_auto_1341_NA	FALSE	0.296729	0.131349
PRJNA707431	SRR13884597	82893355	2664977110	32	1219	SRX10264926		OTHER	other	TRANSCRIPTOMIC	SINGLE	0	0	ILLUMINA	Illumina NovaSeq 6000	SRP309704	PRJNA707431	35137207		SRS8398557	SAMN18205139	simple	9606	Homo sapiens	GSM5140320	GEO	SRA1203922	7	2021	Luan	Cell line:A549	siS16_1.Riboseq	RFP	1					lung	A549		auto_2667	TRUE		auto	RFP_NA_1_NA_lung_A549_NA_NA_auto_2667_NA	FALSE	0.296649	0.710587
PRJNA475675	SRR7293731					SRX4196393		OTHER	other		SINGLE			ILLUMINA		SRP150308	PRJNA475675	30068703	475675	SRS3407028	SAMN09399054			Homo sapiens	GSM3186650	GEO	SRA719937	12	2018	Chatterji	SW480 cell lines	LIN-OE + âˆ†IMP1 RPF	RFP		KO	chx			colon	SW480		IMP1	TRUE		TESHOME	RFP_NA_NA_NA_colon_SW480_KO_NA_IMP1_chx	FALSE	0.296532	0.0471834
PRJNA414611	SRR6181540					SRX3292089		OTHER	other		SINGLE			ILLUMINA		SRP120157	PRJNA414611	30591072	414611	SRS2601268	SAMN07795658			Homo sapiens	GSM2817680	GEO	SRA620345	4	2018	Murat	ATCC Cell Lines	RPF-NT-2	RFP	2		chx	1		ovary	HeLa		NT	TRUE		TESHOME	RFP_1_2_NA_ovary_HeLa_NA_NA_NT_chx	FALSE	0.296276	0.324892
PRJNA257463	SRR1536304					SRX669417		RNA-Seq	cDNA		SINGLE			ILLUMINA		SRP045257	PRJNA257463	25159147	257463	SRS674034	SAMN02951944			Homo sapiens	GSM1464904	GEO	SRA177955	8	2014	Ingolia	HEK cell	bound_HEK	RFP	1	bound	chx			kidney	HEK293			TRUE		HÃ…KON	RFP_NA_1_NA_kidney_HEK293_bound_NA_NA_chx	FALSE	0.295954	0.0077118
PRJNA731488	SRR14605928	23876136	648087755	27	288	SRX10949059		OTHER	other	TRANSCRIPTOMIC	SINGLE	0	0	ILLUMINA	Illumina HiSeq 4000	SRP320683	PRJNA731488	34876589		SRS9027931	SAMN19287274	simple	9606	Homo sapiens	GSM5326933	GEO	SRA1234845	11	2021	Kashiwagi	HEK293 T-REx	Ribo_mut_Tg500	RFP	1					kidney	HEK293		auto_2803	TRUE		auto	RFP_NA_1_NA_kidney_HEK293_NA_NA_auto_2803_NA	FALSE	0.295862	0.0188038
PRJNA401882	SRR5990816					SRX3146516		OTHER	cDNA		SINGLE			ILLUMINA		SRP131318	PRJNA401882	29696588	401882	SRS2478475	SAMN07573561			Homo sapiens	GSM2760249	GEO	SRA604097	5	2018	Lin	muscle and virus	Infect,1.75 h, RPF	RFP	5	infected	chx		1h	muscle	NONE			TRUE		TESHOME	RFP_NA_5_1h_muscle_NONE_infected_NA_NA_chx	FALSE	0.295347	0.208421
PRJNA809587	SRR18113779	39588364	5938254600	150	2091	SRX14264390	GSM5911805	OTHER	other	TRANSCRIPTOMIC	SINGLE	0	0	ILLUMINA	Illumina NovaSeq 6000	SRP361145	PRJNA809587	36074823		SRS12083350	SAMN26199018	simple	9606	Homo sapiens	GSM5911805	Wei Xie, School of Life Sciences, Tsinghua University	SRA1376840	10	2022	Zou	Preimplantation embryo	h_zygote_3PN_25_Ribo_rep2	RFP	2								auto_3351	TRUE		auto	RFP_NA_2_NA_NA_NA_NA_NA_auto_3351_NA	FALSE	0.295295	0.0617093
PRJNA540298	SRR14578812	44339059	2216952950	50	898	SRX10921846		OTHER	other	TRANSCRIPTOMIC	SINGLE	0	0	ILLUMINA	Illumina HiSeq 2500	SRP194188	PRJNA540298	34244513		SRS9011432	SAMN19243569	simple	9606	Homo sapiens	GSM5321288	GEO	SRA880706	1	2022	Lim	Prostate cancer tissue	Lucap 147 Tumor sample, Ribosome bound RNA, replicate1	RFP	1					prostate			auto_1361	TRUE		auto	RFP_NA_1_NA_prostate_NA_NA_NA_auto_1361_NA	FALSE	0.295291	0.099818
PRJNA262009	SRR1585548					SRX709891		RNA-Seq	cDNA		SINGLE			ILLUMINA		SRP047476	PRJNA262009	25657249	262009	SRS708908	SAMN03079310			Homo sapiens	GSM1513249	GEO	SRA185822	7	2015	Battle	lymphoblastoid cell lines derived fromHapMap Yoruba individual	GM19204	RFP	63		frozen			bone	LCL		cyto	TRUE		HÃ…KON	RFP_NA_63_NA_bone_LCL_NA_NA_cyto_frozen	FALSE	0.294945	0.102597
PRJNA707431	SRR13884566	108424779	3427338195	31	2034	SRX10264959		OTHER	other	TRANSCRIPTOMIC	SINGLE	0	0	ILLUMINA	Illumina NovaSeq 6000	SRP309704	PRJNA707431	35137207		SRS8398590	SAMN18205164	simple	9606	Homo sapiens	GSM5140289	GEO	SRA1203922	7	2021	Luan	Cell line:A549	siNC7.Riboseq	RFP	1					lung	A549		auto_2698	TRUE		auto	RFP_NA_1_NA_lung_A549_NA_NA_auto_2698_NA	FALSE	0.294917	0.318974
PRJNA822939	SRR18592266	41506810	3528078850	85	1237	SRX14720941	GSM6008630	OTHER	other	TRANSCRIPTOMIC	SINGLE	0	0	ILLUMINA	NextSeq 500	SRP367409	PRJNA822939	35858571		SRS12483101	SAMN27283803	simple	9606	Homo sapiens	GSM6008630	Department of Genetics and Genome Sciences, Case Western Reserve University	SRA1400321	4	2022	Krokowski	Corneal epithelial cells	6h 500 mOsm + Torin1 rep3 Ribosome profiling	RFP	3	high								TRUE		auto	RFP_NA_3_NA_NA_NA_high_NA_NA_NA	FALSE	0.294412	0.0993516
PRJNA300627	SRR2873534					SRX1402245		OTHER	other		SINGLE			ILLUMINA		SRP065528	PRJNA300627	26878238	300627	SRS1141527	SAMN04226646			Homo sapiens	GSM1921991	GEO	SRA308231	2	2016	Loayza-Puch	PC3 cell line	PC3 control batch2 RP	RFP	1	WT	chx	2		prostate	PC3			TRUE		KORNEL	RFP_2_1_NA_prostate_PC3_WT_NA_NA_chx	FALSE	0.294047	1.63382
PRJNA414611	SRR6181567					SRX3292096		OTHER	other		SINGLE			ILLUMINA		SRP120157	PRJNA414611	30591072	414611	SRS2601275	SAMN07795677			Homo sapiens	GSM2817687	GEO	SRA620345	4	2018	Murat	ATCC Cell Lines	RPF_DHX9_1	RFP	1		chx	5		ovary	HeLa		DHX9	TRUE		TESHOME	RFP_5_1_NA_ovary_HeLa_NA_NA_DHX9_chx	FALSE	0.293833	0.494584
PRJNA268354	SRR2075419					SRX1070448		OTHER	other		SINGLE			ILLUMINA		SRP050213	PRJNA268354	26046440	268354	SRS969575	SAMN03787324			Homo sapiens	GSM1717892	GEO	SRA204377	9	2015	Wang	HeLa cell	Ribosome profiling SiMETTL3-RPF	RFP		KD	chx			ovary	HeLa		METTL3	TRUE		HÃ…KON	RFP_NA_NA_NA_ovary_HeLa_KD_NA_METTL3_chx	FALSE	0.293567	0.145255
PRJNA822939	SRR18592263	33609424	2856801040	85	1013	SRX14720944	GSM6008633	OTHER	other	TRANSCRIPTOMIC	SINGLE	0	0	ILLUMINA	NextSeq 500	SRP367409	PRJNA822939	35858571		SRS12483104	SAMN27283800	simple	9606	Homo sapiens	GSM6008633	Department of Genetics and Genome Sciences, Case Western Reserve University	SRA1400321	4	2022	Krokowski	Corneal epithelial cells	6h 500 mOsm + MeAIB rep2 Ribosome profiling	RFP	2	high							auto_3403	TRUE		auto	RFP_NA_2_NA_NA_NA_high_NA_auto_3403_NA	FALSE	0.293472	0.154081
PRJNA667051	SRR15324722	27031867	850492268	31	373	SRX11629101		OTHER	other	TRANSCRIPTOMIC	SINGLE	0	0	ILLUMINA	NextSeq 500	SRP286182	PRJNA667051	35604092		SRS9665681	SAMN20521087	simple	9606	Homo sapiens	GSM5494622	GEO	SRA1137052	8	2021	Puray-Chavez	Primary human bronchial epithelial cells	Ribo-seq-HBEC-SARS2-4hpi-rep3	RFP	3								auto_2382	TRUE		auto	RFP_NA_3_NA_NA_NA_NA_NA_auto_2382_NA	FALSE	0.29344	0.02037
PRJNA729461	SRR14510060	28183206	660969920	23	290	SRX10855873		OTHER	other	TRANSCRIPTOMIC	SINGLE	0	0	ILLUMINA	Illumina NovaSeq 6000	SRP319472	PRJNA729461	34226921		SRS8951504	SAMN19116416	simple	9606	Homo sapiens	GSM5291904	GEO	SRA1231346	7	2021	Ichihara	HEK293T cells	eIF2A KO HEK293T #1 arsenite Ribo-seq replicate 1	RFP	1	KO				kidney	HEK293	eIF2A	auto_2776	TRUE		auto	RFP_NA_1_NA_kidney_HEK293_KO_eIF2A_auto_2776_NA	FALSE	0.293434	0.0324359
PRJNA940173	SRR23678240	71587924	2092834520	29	838	SRX19541056	GSM7074847	OTHER	other	TRANSCRIPTOMIC	SINGLE	0	0	ILLUMINA	Illumina NovaSeq 6000	SRP425191	PRJNA940173	1		SRS16926827	SAMN33556622	simple	9606	Homo sapiens	GSM7074847	Molecular and Cell Biology, University of California, Berkeley	SRA1597937	3	2023	Makar	K562	K562 CEBPA reporter cell line, PELO sgRNA ribo RNAseI, biol rep 2	RFP	2					bone	K562	PELO	RNAseI	TRUE		Michal	RFP_NA_2_NA_bone_K562_NA_PELO_RNAseI_NA	FALSE	0.293388	0.0353372
PRJNA274997	SRR1795433					SRX870808		RNA-Seq	cDNA		SINGLE			ILLUMINA		SRP053402	PRJNA274997	25719440	274997	SRS841575	SAMN03334811			Homo sapiens	GSM1606111	GEO	SRA237056	2	2015	Sidrauski	HEK293T	ribo_tm_a	RFP	1	treated	chx			kidney	HEK293		tm	TRUE		KORNEL	RFP_NA_1_NA_kidney_HEK293_treated_NA_tm_chx	FALSE	0.293221	0.0813566
PRJNA278390	SRR1916549					SRX957358		RNA-Seq	cDNA		SINGLE			ILLUMINA		SRP056200	PRJNA278390	26538417	278390	SRS874704	SAMN03418222			Homo sapiens	GSM1634450	GEO	SRA246838	11	2015	Elkon	U2OS, Torin-1	Torin.rp.lane2	RFP	1	treated	chx	2		bone	U2OS		Torin	TRUE		KORNEL	RFP_2_1_NA_bone_U2OS_treated_NA_Torin_chx	FALSE	0.292418	0.0981345
PRJNA396698	SRR5886320	90616093	6886823068	76	2470	SRX3052238		OTHER	other	TRANSCRIPTOMIC	SINGLE	0	0	ILLUMINA	NextSeq 500	SRP114504	PRJNA396698	30449621		SRS2398666	SAMN07431143	simple	9606	Homo sapiens	GSM2724038	GEO	SRA595098	11	2018	Arango	HeLa cells, Ribosome Protected RNA	NAT10_KO_Ribo-seq_BioRep_1 (protected RNA)	RFP	1	KO				ovary	HeLa	NAT10_		TRUE		auto	RFP_NA_1_NA_ovary_HeLa_KO_NAT10__NA_NA	FALSE	0.292157	0.307068
PRJNA861947	SRR20613392	18511253	553725095	29	300	SRX16637176	GSM6381585	OTHER	other	TRANSCRIPTOMIC	SINGLE	0	0	ILLUMINA	Illumina HiSeq 2500	SRP387901	PRJNA861947	1		SRS14271737	SAMN29933665	simple	9606	Homo sapiens	GSM6381585	Waseda University	SRA1462202	7	2022	Makar	293T	Ribo-seq miRNA inhibitors_1	RFP	1					kidney	HEK293		auto_3487	TRUE		auto	RFP_NA_1_NA_kidney_HEK293_NA_NA_auto_3487_NA	FALSE	0.291923	0.205327
PRJNA542670	SRR9049065					SRX5825537		OTHER	other		SINGLE			ILLUMINA		SRP198270	PRJNA542670	31284728	542670	SRS4753591	SAMN11635164			Homo sapiens	GSM3763609	GEO	SRA885795	10	2019	Chothani	Left ventricle tissue of end-stage DCM patients	Left ventricle tissue of end-stage DCM patients (20LB01727)	RFP	14		chx			heart	NONE			TRUE		TESHOME	RFP_NA_14_NA_heart_NONE_NA_NA_NA_chx	FALSE	0.291849	0.0520849
PRJNA729461	SRR14510080	57490004	1435384011	24	615	SRX10855893		OTHER	other	TRANSCRIPTOMIC	SINGLE	0	0	ILLUMINA	Illumina NovaSeq 6000	SRP319472	PRJNA729461	34226921		SRS8951524	SAMN19116437	simple	9606	Homo sapiens	GSM5291924	GEO	SRA1231346	7	2021	Ichihara	HEK293T cells	eIF2A, eIF2D DKO HEK293T #2 arsenite Ribo-seq replicate 1	RFP	1	KO				kidney	HEK293	eIF2A, eIF2D D	auto_2786	TRUE		auto	RFP_NA_1_NA_kidney_HEK293_KO_eIF2A, eIF2D D_auto_2786_NA	FALSE	0.291803	0.152821
PRJNA503400	SRR8145458					SRX4966064		OTHER	other		SINGLE			ILLUMINA		SRP167457	PRJNA503400	30467178	503400	SRS4005574	SAMN10359358			Homo sapiens	GSM3454277	GEO	SRA802561	11	2018	Akichika	ribo KO2	ribo_KO2_rep1	RFP	1	KO	chx	2		kidney	HEK293			TRUE		TESHOME	RFP_2_1_NA_kidney_HEK293_KO_NA_NA_chx	FALSE	0.291689	0.0660826
PRJNA707431	SRR13884548	84601862	2728165971	32	1272	SRX10264849		OTHER	other	TRANSCRIPTOMIC	SINGLE	0	0	ILLUMINA	Illumina NovaSeq 6000	SRP309704	PRJNA707431	35137207		SRS8398478	SAMN18205155	simple	9606	Homo sapiens	GSM5140271	GEO	SRA1203922	7	2021	Luan	Cell line:A549	siL35.Riboseq	RFP	1					lung	A549		auto_2626	TRUE		auto	RFP_NA_1_NA_lung_A549_NA_NA_auto_2626_NA	FALSE	0.291285	0.424214
PRJNA701951	SRR13712430	16759814	854750514	51	283	SRX10101206		RNA-Seq	cDNA	TRANSCRIPTOMIC	SINGLE	0	0	ILLUMINA	NextSeq 500	SRP306464	PRJNA701951	35388737		SRS8258239	SAMN17918137	simple	9606	Homo sapiens	GSM5082444	GEO	SRA1196414	4	2022	Hisaoka	HCT116	WT_NCS_RPF_rep2	RFP	2	WT				colon	HCT116		auto_2554	TRUE		auto	RFP_NA_2_NA_colon_HCT116_WT_NA_auto_2554_NA	FALSE	0.29107	0.0729279
PRJNA472636	SRR7207282					SRX4116267		OTHER	other		SINGLE			ILLUMINA		SRP148767	PRJNA472636	30089253	472636	SRS3331555	SAMN09238859			Homo sapiens	GSM3150294	GEO	SRA709715	7	2018	Gameiro	Breast epithelial cell	TAM_NoCys_04hr.3	RFP	3	NoCys	chx		4h	breast	MCF10A		TAM	TRUE		TESHOME	RFP_NA_3_4h_breast_MCF10A_NoCys_NA_TAM_chx	FALSE	0.29085	0.0718627
PRJNA707431	SRR13884603	94705297	2996489804	31	1443	SRX10264940		OTHER	other	TRANSCRIPTOMIC	SINGLE	0	0	ILLUMINA	Illumina NovaSeq 6000	SRP309704	PRJNA707431	35137207		SRS8398570	SAMN18205188	simple	9606	Homo sapiens	GSM5140326	GEO	SRA1203922	7	2021	Luan	Cell line:A549	siS21.Riboseq	RFP	1					lung	A549		auto_2681	TRUE		auto	RFP_NA_1_NA_lung_A549_NA_NA_auto_2681_NA	FALSE	0.290614	1.24624
PRJNA415390	SRR6202819					SRX3312741		OTHER	other		SINGLE			ILLUMINA		SRP120964	PRJNA415390	31601799	415390	SRS2618697	SAMN07822281			Homo sapiens	GSM2828171	GEO	SRA622650	8	2019	Kuppers	Ribosome protected RNA library from WTAP sgRNA HEL cells	WTAPribo_1	RFP	1	WT	chx			blood	HEL			TRUE		TESHOME	RFP_NA_1_NA_blood_HEL_WT_NA_NA_chx	FALSE	0.29048	0.0268664
PRJNA213675	SRR944655					SRX329061		OTHER	other		SINGLE			ILLUMINA		SRP028325	PRJNA213675	23453015	213675	SRS465171	SAMN02297661			Homo sapiens	GSM1197614	GEO	SRA096240	7	2015	Niu	HeLa cell	Ribosome profiling rep1-SiYTHDF2-RPF C3	RFP	1	KD	chx			ovary	HeLa			TRUE		HÃ…KON	RFP_NA_1_NA_ovary_HeLa_KD_NA_NA_chx	FALSE	0.289426	0.143531
PRJNA729461	SRR14510045	53280058	1401909457	26	575	SRX10855858		OTHER	other	TRANSCRIPTOMIC	SINGLE	0	0	ILLUMINA	Illumina NovaSeq 6000	SRP319472	PRJNA729461	34226921		SRS8951489	SAMN19116460	simple	9606	Homo sapiens	GSM5291889	GEO	SRA1231346	7	2021	Ichihara	HEK293T cells	eIF2D KO HEK293T #2 Ribo-seq replicate 2	RFP	2	KO				kidney	HEK293	eIF2D	auto_2773	TRUE		auto	RFP_NA_2_NA_kidney_HEK293_KO_eIF2D_auto_2773_NA	FALSE	0.289386	0.294716
PRJNA268222	SRR1660330					SRX765941		RNA-Seq	cDNA		SINGLE			ILLUMINA		SRP050147	PRJNA268222	25896322	268222	SRS750218	SAMN03216854			Homo sapiens	GSM1552807	GEO	SRA204209	4	2015	Grow	Rec-OE-NCCIT hECC	Rec-OE NCCIT Ribosome profiling (RPF)	RFP	3	OE	chx			mediastinum	NCCIT		Rec	TRUE		KORNEL	RFP_NA_3_NA_mediastinum_NCCIT_OE_NA_Rec_chx	FALSE	0.289033	0.48048
PRJNA415033	SRR6191040	36355684	1109777133	30	1108	SRX3301067		OTHER	other	TRANSCRIPTOMIC	SINGLE	0	0	ILLUMINA	Illumina HiSeq 3000	SRP120504	PRJNA415033	31160600		SRS2612415	SAMN07814393	simple	9606	Homo sapiens	GSM2824217	GEO	SRA621248	7	2019	Sauer	DHX36-KO-HEK293	DHX36-KO Riboseq 1	RFP	1	KO				kidney	HEK293	DHX36-		TRUE		auto	RFP_NA_1_NA_kidney_HEK293_KO_DHX36-_NA_NA	FALSE	0.289015	0.289145
PRJNA681523	SRR13165891					SRX9604752		OTHER	other		SINGLE			ILLUMINA		SRP295094	PRJNA681523		681523	SRS7808353	SAMN16955151			Homo sapiens	GSM4949730	GEO	SRA1165019	4	2021	Waldron	Calu 3 cells, ATCC HTB-49	Calu3_fp_uninf_1	RFP	1	WT	chx			lung	Calu3			TRUE		PREETI	RFP_NA_1_NA_lung_Calu3_WT_NA_NA_chx	FALSE	0.28895	0.0957096
PRJNA501880	SRR8136743					SRX4957718		OTHER	other		SINGLE			ILLUMINA		SRP167245	PRJNA501880	30875366	501880	SRS3997748	SAMN10348605			Homo sapiens	GSM3452616	GEO	SRA800863	1	2019	Liaud	Huh7_0.5% DMSOfor 1 hr	0.5% DMSO, 1 hr, rep 1	RFP	1	WT	chx			liver	Huh7		dmso	TRUE		TESHOME	RFP_NA_1_NA_liver_Huh7_WT_NA_dmso_chx	FALSE	0.288785	0.410804
PRJNA861947	SRR20613397	13818135	410657901	29	220	SRX16637171	GSM6381580	OTHER	other	TRANSCRIPTOMIC	SINGLE	0	0	ILLUMINA	Illumina HiSeq 2500	SRP387901	PRJNA861947	1		SRS14271731	SAMN29933670	simple	9606	Homo sapiens	GSM6381580	Waseda University	SRA1462202	7	2022	Makar	293T	Ribo-seq Scr2	RFP	1					kidney	HEK293		auto_3483	TRUE		auto	RFP_NA_1_NA_kidney_HEK293_NA_NA_auto_3483_NA	FALSE	0.288546	0.113598
PRJNA314507	SRR3208909					SRX1617592		RNA-Seq	cDNA		SINGLE			ILLUMINA		SRP071235	PRJNA314507	27655340	314507	SRS1326968	SAMN04536326			Homo sapiens	GSM2082561	GEO	SRA379362	7	2016	Grabole	TSC2-/- cells (number 19) treated with DMSO, RPF	Ribosome protected fragments (RPF) of TSC2-/- cells (number 19) treated with DMSO, Biological Replicate 1	RFP	1	m_m	chx	19		skin	TSC2		dmso	TRUE		KORNEL	RFP_19_1_NA_skin_TSC2_m_m_NA_dmso_chx	FALSE	0.288207	0.592039
PRJNA707431	SRR13884575	67168471	2141574921	31	979	SRX10264820		OTHER	other	TRANSCRIPTOMIC	SINGLE	0	0	ILLUMINA	Illumina NovaSeq 6000	SRP309704	PRJNA707431	35137207		SRS8398448	SAMN18205133	simple	9606	Homo sapiens	GSM5140298	GEO	SRA1203922	7	2021	Luan	Cell line:A549	siS4X.Riboseq	RFP	1					lung	A549		auto_2621	TRUE		auto	RFP_NA_1_NA_lung_A549_NA_NA_auto_2621_NA	FALSE	0.287458	0.337492
PRJNA453915	SRR7073151					SRX4003599		RNA-Seq	cDNA		SINGLE			ILLUMINA		SRP143452	PRJNA453915	30029003	453915	SRS3225401	SAMN08993018			Homo sapiens	GSM3118958	GEO	SRA696853	7	2018	Darnell	HEK293T cells, ATCC CRL-3216, GCN2 KO	gcn2ko_rich_6h	RFP			chx		6h	kidney	HEK293		gcn2ko_rich	TRUE		TESHOME	RFP_NA_NA_6h_kidney_HEK293_NA_NA_gcn2ko_rich_chx	FALSE	0.287225	0.0696383
PRJNA414611	SRR6181544					SRX3292090		OTHER	other		SINGLE			ILLUMINA		SRP120157	PRJNA414611	30591072	414611	SRS2601269	SAMN07795657			Homo sapiens	GSM2817681	GEO	SRA620345	4	2018	Murat	ATCC Cell Lines	RPF_sc_2	RFP	2		chx	3		ovary	HeLa		sc	TRUE		TESHOME	RFP_3_2_NA_ovary_HeLa_NA_NA_sc_chx	FALSE	0.287006	0.276574
PRJNA478455	SRR7451192					SRX4321696	D17-4821	OTHER	RT-PCR		SINGLE			ILLUMINA		SRP151602	PRJNA478455	30466063	478455	SRS3484163	SAMN09516438			Homo sapiens	RP90-1	MASSACHUSETTS INSTITUTE OF TECHNOLOGY	SRA730597	6	2018	Rothenberg		RFP_PBS_90_min_Rep_1	RFP	1		chx		90m	breast	MCF10A		PBS	TRUE		TESHOME	RFP_NA_1_90m_breast_MCF10A_NA_NA_PBS_chx	FALSE	0.287	0.865601
PRJNA707431	SRR13884513	44074383	1384453930	31	1136	SRX10264790		OTHER	other	TRANSCRIPTOMIC	SINGLE	0	0	ILLUMINA	Illumina NovaSeq 6000	SRP309704	PRJNA707431	35137207		SRS8398418	SAMN18205310	simple	9606	Homo sapiens	GSM5140236	GEO	SRA1203922	7	2021	Luan	Cell line:A549	siL4.Riboseq	RFP	1					lung	A549		auto_2599	TRUE		auto	RFP_NA_1_NA_lung_A549_NA_NA_auto_2599_NA	FALSE	0.286791	0.267598
PRJNA300627	SRR2873537					SRX1402246		OTHER	other		SINGLE			ILLUMINA		SRP065528	PRJNA300627	26878238	300627	SRS1141528	SAMN04226647			Homo sapiens	GSM1921992	GEO	SRA308231	2	2016	Loayza-Puch	PC3 cell line	PC3 ASNase 1 batch2 RP	RFP	2	ASNase	chx	2		prostate	PC3		ASNase	TRUE		KORNEL	RFP_2_2_NA_prostate_PC3_ASNase_NA_ASNase_chx	FALSE	0.286777	1.23533
PRJNA257365	SRR1535522					SRX668704		RNA-Seq	cDNA		SINGLE			ILLUMINA		SRP045214	PRJNA257365	25989971	257365	SRS673067	SAMN02950954			Homo sapiens	GSM1464097	GEO	SRA177782	7	2015	Rutkowski	Ribosome profiling	RP 2 h p.i. - Rep 1	RFP	1		chx	1	2h	skin	NONE			TRUE		HÃ…KON	RFP_1_1_2h_skin_NONE_NA_NA_NA_chx	FALSE	0.286665	0.0882788
PRJNA512837	SRR8392710	38962857	2449686160	62	978	SRX5202421		RNA-Seq	cDNA	TRANSCRIPTOMIC	SINGLE	0	0	ILLUMINA	Illumina HiSeq 2000	SRP175158	PRJNA512837	33257563		SRS4207572	SAMN10689170	simple	9606	Homo sapiens	GSM3537595	GEO	SRA830119	12	2020	Sabath	WI38 cells	Senescent2_Ribo_Seq	RFP	1								auto_1255	TRUE		auto	RFP_NA_1_NA_NA_NA_NA_NA_auto_1255_NA	FALSE	0.286212	0.297185
PRJNA309995	SRR3129149					SRX1549422		RNA-Seq	cDNA		SINGLE			ILLUMINA		SRP068967	PRJNA309995	27259150	309995	SRS1266217	SAMN04444428			Homo sapiens	GSM2048205	GEO	SRA342069	6	2016	Goodarzi	CN34-parental	CN34-RPF-rep2	RFP	2	WT	chx			breast	CN34		parental	TRUE		HÃ…KON	RFP_NA_2_NA_breast_CN34_WT_NA_parental_chx	FALSE	0.2861	0.0424698
PRJNA275386	SRR1803155					SRX876732		OTHER	other		SINGLE			ILLUMINA		SRP055009	PRJNA275386	26297486	275386	SRS845415	SAMN03344056			Homo sapiens	GSM1609386	GEO	SRA241011	2	2015	Cenik	EBV-transformed lymphoblastoid cells	GM18489_Rep1	RFP	1		chx			bone	LCL		GM18489	TRUE		KORNEL	RFP_NA_1_NA_bone_LCL_NA_NA_GM18489_chx	FALSE	0.286025	0.0959712
PRJNA129385	SRR057522					SRX021970	GSM546924: Footprint_miR-1_32hr_runs1-2	RNA-Seq	cDNA		SINGLE			ILLUMINA		SRP002605	PRJNA129385	20703300	129385	SRS079389	SAMN00014834			Homo sapiens	GSM546924	GEO	SRA020150	8	2010	Guo	HeLa	Footprint_miR-1_32hr_runs1-2	RFP	2	mir1	chx		32h	ovary	HeLa			TRUE		HÃ…KON	RFP_NA_2_32h_ovary_HeLa_mir1_NA_NA_chx	FALSE	0.285901	0.20471
PRJNA822939	SRR18592274	29481343	2505914155	85	843	SRX14720933	GSM6008622	OTHER	other	TRANSCRIPTOMIC	SINGLE	0	0	ILLUMINA	NextSeq 500	SRP367409	PRJNA822939	35858571		SRS12483093	SAMN27283811	simple	9606	Homo sapiens	GSM6008622	Department of Genetics and Genome Sciences, Case Western Reserve University	SRA1400321	4	2022	Krokowski	Corneal epithelial cells	1h 500 mOsm rep3 Ribosome profiling	RFP	3									TRUE		auto	RFP_NA_3_NA_NA_NA_NA_NA_NA_NA	FALSE	0.285874	0.0398444
PRJNA701894	SRR13711199	46483039	2835465379	61	1143	SRX10100111		OTHER	other	TRANSCRIPTOMIC	SINGLE	0	0	ILLUMINA	Illumina HiSeq 2500	SRP306425	PRJNA701894	35857873		SRS8257249	SAMN17916068	simple	9606	Homo sapiens	GSM5082076	GEO	SRA1196361	7	2022	Sehrawat	HEK293T cells	i14G1-12_Ribo-seq_2	RFP	1					kidney	HEK293		auto_2547	TRUE		auto	RFP_NA_1_NA_kidney_HEK293_NA_NA_auto_2547_NA	FALSE	0.285874	0.0713441
PRJNA275305	SRR1802130					SRX876047		OTHER	other		SINGLE			ILLUMINA		SRP054971	PRJNA275305	26900662	275305	SRS844823	SAMN03342110			Homo sapiens	GSM1608269	GEO	SRA240809	11	2015	Ji	Breast epithelial cell	ERSrcTAM01hr_chx_rep1	RFP	1	KO	chx		1hr	breast	NONE		ER_SrcTAM	TRUE		KORNEL	RFP_NA_1_1hr_breast_NONE_KO_NA_ER_SrcTAM_chx	FALSE	0.285874	0.0575321
PRJNA680364	SRR13120324	15756528	787826400	50	311	SRX9562387		OTHER	other	TRANSCRIPTOMIC	SINGLE	0	0	ILLUMINA	Illumina HiSeq 2000	SRP293929	PRJNA680364	35292784		SRS7776224	SAMN16878456	simple	9606	Homo sapiens	GSM4932278	GEO	SRA1162979	12	2021	Guzzi	H9 cells	H9 PUS7KO RPF replicate 2	RFP	2	KO						H9 PUS7		TRUE		auto	RFP_NA_2_NA_NA_NA_KO_H9 PUS7_NA_NA	FALSE	0.285874	0.0388147
PRJNA274997	SRR1795437					SRX870810		RNA-Seq	cDNA		SINGLE			ILLUMINA		SRP053402	PRJNA274997	25719440	274997	SRS841573	SAMN03334808			Homo sapiens	GSM1606113	GEO	SRA237056	2	2015	Sidrauski	HEK293T	ribo_tmisrib_a	RFP	1	treated	chx			kidney	HEK293		tmisrib	TRUE		KORNEL	RFP_NA_1_NA_kidney_HEK293_treated_NA_tmisrib_chx	FALSE	0.285874	0.0535145
PRJNA729461	SRR14510027	26330536	634932980	24	279	SRX10855840		OTHER	other	TRANSCRIPTOMIC	SINGLE	0	0	ILLUMINA	Illumina NovaSeq 6000	SRP319472	PRJNA729461	34226921		SRS8951471	SAMN19116478	simple	9606	Homo sapiens	GSM5291871	GEO	SRA1231346	7	2021	Ichihara	HEK293T cells	WT HEK293T LTM replicate 2	RFP	2	WT	ltm			kidney	HEK293			TRUE		auto	RFP_NA_2_NA_kidney_HEK293_WT_NA_NA_ltm	FALSE	0.285874	0.043969
PRJNA275305	SRR1802136					SRX876053		OTHER	other		SINGLE			ILLUMINA		SRP054971	PRJNA275305	26900662	275305	SRS844818	SAMN03342121			Homo sapiens	GSM1608275	GEO	SRA240809	11	2015	Ji	Breast epithelial cell	ERSrcTAM24hr_harr_rep1	RFP	1	KO	harr		24hr	breast	NONE		ER_SrcTAM	TRUE		KORNEL	RFP_NA_1_24hr_breast_NONE_KO_NA_ER_SrcTAM_harr	FALSE	0.285818	0.0279828
PRJNA703954	SRR13762833					SRX10149506		OTHER	other		SINGLE			ILLUMINA		SRP307513	PRJNA703954		703954	SRS8301823	SAMN18025991			Homo sapiens	GSM5099834	GEO	SRA1198815	2	2021	Thomaidou	Human fetal pancreatic bulbs	ENDOC-Î²H1 cells non treated rep 2 -ribosome profiling [NT1]	RFP	1	WT	chx	2		pancreas	ENDOC			TRUE		PREETI	RFP_2_1_NA_pancreas_ENDOC_WT_NA_NA_chx	FALSE	0.285746	0.053957
PRJNA613736	SRR11362460					SRX7963882		RNA-Seq	cDNA		SINGLE			ILLUMINA		SRP253534	PRJNA613736	32503920	613736	SRS6349900	SAMN14418997			Homo sapiens	GSM4426002	GEO	SRA1057647	3	2020	Zinshteyn	K562 cells	set3_qiagen_fastselect_1	RFP	1		chx	3		bone	K562		qiagen	TRUE		PREETI	RFP_3_1_NA_bone_K562_NA_NA_qiagen_chx	FALSE	0.285688	0.13775
PRJNA281177	SRR1976447					SRX997415		OTHER	other		SINGLE			ILLUMINA		SRP057253	PRJNA281177	26305499	281177	SRS911639	SAMN03485791			Homo sapiens	GSM1657724	GEO	SRA259601	9	2015	Tanenbaum	Human Retinal pigment epithelial cells immortalized with hTERT	Ribosome footprints from M cells, pretreated with cycloheximide_1	RFP	1		chx		M	retina	hTERT_RPE			TRUE		KORNEL	RFP_NA_1_M_retina_hTERT_RPE_NA_NA_NA_chx	FALSE	0.285409	0.325645
PRJNA605114	SRR12879066	31375917	1123778168	35	784	SRX7685816		RNA-Seq	cDNA	TRANSCRIPTOMIC	SINGLE	0	0	ILLUMINA	Illumina HiSeq 3000	SRP247494	PRJNA605114	33053355		SRS6112319	SAMN14049753	simple	9606	Homo sapiens	GSM4299134	GEO	SRA1038955	10	2020	Weber	HEK293T	4EHP-null replicate 2 for Ribo-seq	RFP	1					kidney	HEK293		auto_2141	TRUE		auto	RFP_NA_1_NA_kidney_HEK293_NA_NA_auto_2141_NA	FALSE	0.284915	0.167194
PRJNA656190	SRR12415946	53044980	3978373500	75	1138	SRX8912037		OTHER	other	TRANSCRIPTOMIC	SINGLE	0	0	ILLUMINA	Illumina HiSeq 2000	SRP276951	PRJNA656190	1		SRS7168900	SAMN15767707	simple	9606	Homo sapiens	GSM4715689	GEO	SRA1110388	12	2021	Makar	CAG NAT10 OE	OE: Human multiple myeloma cells with NAT10 overexpression for Ribo-seq	RFP	1									TRUE		auto	RFP_NA_1_NA_NA_NA_NA_NA_NA_NA	FALSE	0.284573	0.062689
GSE208041	SRR20106167	165751250	5854454271	35	1967	SRX16141476	GSM6333414	OTHER	other	TRANSCRIPTOMIC	SINGLE	0	0	ILLUMINA	Illumina NovaSeq 6000	SRP386079	PRJNA858047	36284713		SRS13803501	SAMN29661005	simple	9606	Homo sapiens	GSM6333414	AG Uhlenhaut, Institute for Diabetes and Endocrinology (IDE), Helmholz Zentrum MÃ¼nchen	SRA1453914	10	2022	Ansari	THP-1	THP-1 cells, Riboseq/Vehicle, 3h, rep2	RFP	2				3h	blood	THP1		Vehicle	TRUE		Michal	RFP_NA_2_3h_blood_THP1_NA_NA_Vehicle_NA	FALSE	0.284559	1.11961
PRJNA822939	SRR18592280	36268835	3082850975	85	1036	SRX14720927	GSM6008616	OTHER	other	TRANSCRIPTOMIC	SINGLE	0	0	ILLUMINA	NextSeq 500	SRP367409	PRJNA822939	35858571		SRS12483087	SAMN27283817	simple	9606	Homo sapiens	GSM6008616	Department of Genetics and Genome Sciences, Case Western Reserve University	SRA1400321	4	2022	Krokowski	Corneal epithelial cells	Control rep1 Ribosome profiling	RFP	1	WT								TRUE		auto	RFP_NA_1_NA_NA_NA_WT_NA_NA_NA	FALSE	0.284557	0.476709
PRJNA492921	SRR7896326	391946788	29787955888	76	10643	SRX4733767		OTHER	other	TRANSCRIPTOMIC	SINGLE	0	0	ILLUMINA	NextSeq 500	SRP162475	PRJNA492921	1		SRS3815894	SAMN10118479	simple	9606	Homo sapiens	GSM3399570	GEO	SRA782997	9	2019	Makar	MCF10A cells	RPF: All RPF reads for the samples (multiplexed)	RFP	1					breast	MCF10A			TRUE		auto	RFP_NA_1_NA_breast_MCF10A_NA_NA_NA_NA	FALSE	0.284339	0.656053
PRJNA707431	SRR13884576	58665986	1881481886	32	908	SRX10264861		OTHER	other	TRANSCRIPTOMIC	SINGLE	0	0	ILLUMINA	Illumina NovaSeq 6000	SRP309704	PRJNA707431	35137207		SRS8398489	SAMN18205132	simple	9606	Homo sapiens	GSM5140299	GEO	SRA1203922	7	2021	Luan	Cell line:A549	siS4Y.Riboseq	RFP	1					lung	A549		auto_2630	TRUE		auto	RFP_NA_1_NA_lung_A549_NA_NA_auto_2630_NA	FALSE	0.284252	0.425707
PRJNA599422	SRR10846525					SRX7517151		OTHER	other		SINGLE			ILLUMINA		SRP239882	PRJNA599422		599422	SRS5956817	SAMN13750417			Homo sapiens	GSM4255693	GEO	SRA1021798	8	2020	Ouspenskaia	B721.221	B721.221_A0101	RFP	1		chx	1		bone	LCL			TRUE		PREETI	RFP_1_1_NA_bone_LCL_NA_NA_NA_chx	FALSE	0.284168	0.0948357
PRJNA401882	SRR5990833					SRX3146522		OTHER	cDNA		SINGLE			ILLUMINA		SRP131318	PRJNA401882	29696588	401882	SRS2478480	SAMN07573555			Homo sapiens	GSM2760255	GEO	SRA604097	5	2018	Lin	muscle	Mock,6.25 h, RPF, rep1	RFP	1	mock	chx	4	6h	muscle	NONE			TRUE		TESHOME	RFP_4_1_6h_muscle_NONE_mock_NA_NA_chx	FALSE	0.283894	0.302945
PRJNA182756	SRR627622					SRX207947		OTHER	other		SINGLE			ILLUMINA		SRP017378	PRJNA182756	23594524	182756	SRS377848	SAMN01821858			Homo sapiens	GSM1047586	GEO	SRA062117	3	2013	Loayza-Puch	Immortalized primary fibroblasts	Q1.rp	RFP	1	Q	chx			skin	BJ		RASG12V	TRUE		HÃ…KON	RFP_NA_1_NA_skin_BJ_Q_NA_RASG12V_chx	FALSE	0.283825	0.175169
PRJNA707431	SRR13884606	53003665	1609268483	30	878	SRX10264943		OTHER	other	TRANSCRIPTOMIC	SINGLE	0	0	ILLUMINA	Illumina NovaSeq 6000	SRP309704	PRJNA707431	35137207		SRS8398574	SAMN18205185	simple	9606	Homo sapiens	GSM5140329	GEO	SRA1203922	7	2021	Luan	Cell line:A549	siS25.Riboseq	RFP	1					lung	A549		auto_2684	TRUE		auto	RFP_NA_1_NA_lung_A549_NA_NA_auto_2684_NA	FALSE	0.283419	0.17153
PRJNA599422	SRR10846536					SRX7517158		OTHER	other		SINGLE			ILLUMINA		SRP239882	PRJNA599422		599422	SRS5956824	SAMN13750410			Homo sapiens	GSM4255700	GEO	SRA1021798	8	2020	Ouspenskaia	Hmel	Hmel_rep1	RFP	2		chx	1		breast	Hmel			TRUE		PREETI	RFP_1_2_NA_breast_Hmel_NA_NA_NA_chx	FALSE	0.283384	0.146382
PRJNA549955	SRR9332879					SRX6099388		OTHER	other		SINGLE			ILLUMINA		SRP202033	PRJNA549955	32890404	549955	SRS4999918	SAMN12100527			Homo sapiens	GSM3900209	GEO	SRA901599	6	2019	Campos	RPLP1 and RPLP2 depleted A549 cells infected with DENV.	Ribo_NSC_2	RFP	2	WT	chx			lung	A549			TRUE		TESHOME	RFP_NA_2_NA_lung_A549_WT_NA_NA_chx	FALSE	0.282929	0.135804
PRJNA542670	SRR9049070					SRX5825542		OTHER	other		SINGLE			ILLUMINA		SRP198270	PRJNA542670	31284728	542670	SRS4753596	SAMN11635158			Homo sapiens	GSM3763614	GEO	SRA885795	10	2019	Chothani	Left ventricle tissue of end-stage DCM patients	Left ventricle tissue of end-stage DCM patients (20ML01902)	RFP	19		chx			heart	NONE			TRUE		TESHOME	RFP_NA_19_NA_heart_NONE_NA_NA_NA_chx	FALSE	0.282898	0.0205451
PRJNA655417	SRR12391506					SRX8889941		OTHER	other		SINGLE			ILLUMINA		SRP276055	PRJNA655417	32992958	655417	SRS7149420	SAMN15734827			Homo sapiens	GSM4711289	GEO	SRA1108561	9	2020	Kiltschewskij	SH-SY5Y cell line	resting 2 [r2.ribo]	RFP	2	WT	chx			brain	SHSY5Y			TRUE		PREETI	RFP_NA_2_NA_brain_SHSY5Y_WT_NA_NA_chx	FALSE	0.282893	0.104931
PRJNA743042	SRR15014906	34124958	2729996640	80	883	SRX11326838		OTHER	other	TRANSCRIPTOMIC	SINGLE	0	0	ILLUMINA	NextSeq 500	SRP326500	PRJNA743042	35322228		SRS9360264	SAMN19989672	simple	9606	Homo sapiens	GSM5412819	GEO	SRA1253510	7	2021	Wang	Patient fibroblasts (PFB)	Ribo_PFB_Lib5_Tyr_rep2	RFP	2								auto_2836	TRUE		auto	RFP_NA_2_NA_NA_NA_NA_NA_auto_2836_NA	FALSE	0.282741	0.0363305
PRJNA472015	SRR7182551					SRX4099350		OTHER	other		SINGLE			ILLUMINA		SRP148422	PRJNA472015	30673779	472015	SRS3315535	SAMN09223523			Homo sapiens	GSM3146280	GEO	SRA706809	5	2018	Machkovech	A549 cells	ribosome footprints_ltm_ifn	RFP			ltm			lung	A549		ifn	TRUE		TESHOME	RFP_NA_NA_NA_lung_A549_NA_NA_ifn_ltm	FALSE	0.282592	0.0704499
PRJNA213675	SRR944662					SRX329068		OTHER	other		SINGLE			ILLUMINA		SRP028325	PRJNA213675	23453015	213675	SRS465178	SAMN02297669			Homo sapiens	GSM1197621	GEO	SRA096240	7	2015	Niu	HeLa cell	Ribosome profiling rep2-SiYTHDF2-RPF C8	RFP	2	KD	chx			ovary	HeLa			TRUE		HÃ…KON	RFP_NA_2_NA_ovary_HeLa_KD_NA_NA_chx	FALSE	0.282468	0.144034
GSE208041	SRR20106154	207768316	7371842802	35	2447	SRX16141489	GSM6333427	OTHER	other	TRANSCRIPTOMIC	SINGLE	0	0	ILLUMINA	Illumina NovaSeq 6000	SRP386079	PRJNA858047	36284713		SRS13803514	SAMN29660992	simple	9606	Homo sapiens	GSM6333427	AG Uhlenhaut, Institute for Diabetes and Endocrinology (IDE), Helmholz Zentrum MÃ¼nchen	SRA1453914	10	2022	Ansari	THP-1	THP-1 cells, Riboseq/LPSDex, 3h, rep5	RFP	5				3h	blood	THP1		LPSDex	TRUE		Michal	RFP_NA_5_3h_blood_THP1_NA_NA_LPSDex_NA	FALSE	0.282449	1.49072
PRJNA789542	SRR17920633	288830667	14730364017	51	5489	SRX13427209	GSM5737989	OTHER	other	TRANSCRIPTOMIC	SINGLE	0	0	ILLUMINA	Illumina HiSeq 4000	SRP351123	PRJNA789542	1		SRS11328242	SAMN24126113	simple	9606	Homo sapiens	GSM5737989	Universitaet Hamburg	SRA1615553	4	2023	Makar	WT CFTR	RPF_CFBE_WT_CFTR	RFP		WT								TRUE		auto	RFP_NA_NA_NA_NA_NA_WT_NA_NA_NA	FALSE	0.282316	0.125686
PRJEB26593	ERR2603016					ERX2619672	Ribosome profiling (RiboSeq) of ribosome footprints from LoVo cells at time 0h (mock infection), replicate 1	RNA-Seq	size fractionation		SINGLE			ILLUMINA		ERP108595	PRJEB26593	32584699	635830	ERS2518595	SAMEA4698423			Homo sapiens	0h-r1	INSTITUT DE BIOLOGIE DE ECOLE NORMALE SUPERIEURE (	ERA1502185	5	2020	Besic	epithelial colon adenocarcinoma	Non-infected LoVo cells, Replicate 1	RFP	1	WT	chx			colon	LoVo			TRUE		PREETI	RFP_NA_1_NA_colon_LoVo_WT_NA_NA_chx	FALSE	0.282178	1.7282
PRJNA251587	SRR1333394					SRX569215		RNA-Seq	cDNA		SINGLE			ILLUMINA		SRP042937	PRJNA251587	25510491	251587	SRS627193	SAMN02837521			Homo sapiens	GSM1403308	GEO	SRA169092	12	2014	CrappÃ©	Colorectal carcinoma cell line	Lactimidomycin treated HCT116	RFP	1		ltm			colon	HCT116			TRUE		HÃ…KON	RFP_NA_1_NA_colon_HCT116_NA_NA_NA_ltm	FALSE	0.282062	0.55428
PRJNA287136	SRR2064438					SRX1059905		OTHER	other		SINGLE			ILLUMINA		SRP059546	PRJNA287136	26878238	287136	SRS962190	SAMN03776753			Homo sapiens	GSM1712837	GEO	SRA273143	7	2017	Loayza-Puch	SUM159 cell line	SUM159 batch3d control RP	RFP	2	WT	chx	3	0h	breast	SUM159			TRUE		KORNEL	RFP_3_2_0h_breast_SUM159_WT_NA_NA_chx	FALSE	0.282021	0.260853
PRJNA287137	SRR2064449					SRX1059911		OTHER	other		SINGLE			ILLUMINA		SRP059548	PRJNA287137	26878238	287137	SRS962197	SAMN03776765			Homo sapiens	GSM1712843	GEO	SRA273145	2	2016	Loayza-Puch	MCF7 cell line	MCF7 control batch7 RP	RFP	1	WT	chx			breast	MCF7			TRUE		KORNEL	RFP_NA_1_NA_breast_MCF7_WT_NA_NA_chx	FALSE	0.280302	0.254402
PRJNA625261	SRR11542147					SRX8112245		OTHER	other		SINGLE			ILLUMINA		SRP256332	PRJNA625261	33296667	625261	SRS6477331	SAMN14596017			Homo sapiens	GSM4475942	GEO	SRA1065150	12	2020	Chen	Malignant Melanoma	375_DMSO1	RFP	1		chx			skin	A375		dmso	TRUE		PREETI	RFP_NA_1_NA_skin_A375_NA_NA_dmso_chx	FALSE	0.280059	0.206652
PRJNA414611	SRR6181572					SRX3292097		OTHER	other		SINGLE			ILLUMINA		SRP120157	PRJNA414611	30591072	414611	SRS2601276	SAMN07795676			Homo sapiens	GSM2817688	GEO	SRA620345	4	2018	Murat	ATCC Cell Lines	RPF_DHX9_2	RFP	2		chx	5		ovary	HeLa		DHX9	TRUE		TESHOME	RFP_5_2_NA_ovary_HeLa_NA_NA_DHX9_chx	FALSE	0.279835	0.947747
PRJNA171327	SRR618773					SRX172392	HEK293_LTM_Rep2	RNA-Seq	size fractionation		SINGLE			ILLUMINA		SRP014629	PRJNA171327	23290916	171327	SRS351808	SAMN01093934			Homo sapiens	HEK293_LTM_Rep2	CORNELL	SRA056377	11	2012	Liu		Ribosome profiling of HEK293 cells treated with lactimidomycin, technical replicate #2	RFP	2		ltm			kidney	HEK293			TRUE		HÃ…KON	RFP_NA_2_NA_kidney_HEK293_NA_NA_NA_ltm	FALSE	0.279633	0.0947317
PRJNA633047	SRR11794843					SRX8346812	KO rep1 mock RPF	OTHER	other		SINGLE			ILLUMINA		SRP261790	PRJNA633047	32839537	633047	SRS6663543	SAMN14931311			Homo sapiens	KO_rep1_mock_ribpro	UNIVERSITY OF WISCONSIN MADISON	SRA1075839	7	2020	Mehle		KO_rep1_mock_ribpro	RFP	1	KO	frozen			lung	A549			TRUE		PREETI	RFP_NA_1_NA_lung_A549_KO_NA_NA_frozen	FALSE	0.279633	0.061128
PRJNA701951	SRR13712428	16231618	827812518	51	275	SRX10101204		RNA-Seq	cDNA	TRANSCRIPTOMIC	SINGLE	0	0	ILLUMINA	NextSeq 500	SRP306464	PRJNA701951	35388737		SRS8258236	SAMN17918139	simple	9606	Homo sapiens	GSM5082442	GEO	SRA1196414	4	2022	Hisaoka	HCT116	WT_Ctrl_RPF_rep2	RFP	2	WT				colon	HCT116			TRUE		auto	RFP_NA_2_NA_colon_HCT116_WT_NA_NA_NA	FALSE	0.279633	0.0929947
PRJNA300627	SRR2873536					SRX1402246		OTHER	other		SINGLE			ILLUMINA		SRP065528	PRJNA300627	26878238	300627	SRS1141528	SAMN04226647			Homo sapiens	GSM1921992	GEO	SRA308231	2	2016	Loayza-Puch	PC3 cell line	PC3 ASNase 1 batch2 RP	RFP	1	ASNase	chx	2		prostate	PC3		ASNase	TRUE		KORNEL	RFP_2_1_NA_prostate_PC3_ASNase_NA_ASNase_chx	FALSE	0.279414	0.718442
PRJNA605114	SRR12879068	28849247	1046036463	36	728	SRX7685818		RNA-Seq	cDNA	TRANSCRIPTOMIC	SINGLE	0	0	ILLUMINA	Illumina HiSeq 3000	SRP247494	PRJNA605114	33053355		SRS6112321	SAMN14049751	simple	9606	Homo sapiens	GSM4299136	GEO	SRA1038955	10	2020	Weber	HEK293T	GIGYF1/2-null replicate 2 for Ribo-seq	RFP	1					kidney	HEK293		auto_2143	TRUE		auto	RFP_NA_1_NA_kidney_HEK293_NA_NA_auto_2143_NA	FALSE	0.279412	0.255263
PRJNA528026	SRR8752388					SRX5543314		RNA-Seq	cDNA		SINGLE			ILLUMINA		SRP188848	PRJNA528026	32040547	528026	SRS4508984	SAMN11166402			Homo sapiens	GSM3679627	GEO	SRA862154	2	2020	Haneke	RPEI cells	FP_DMSO_3	RFP	3		chx			eye	RPEI		dmso	TRUE		TESHOME	RFP_NA_3_NA_eye_RPEI_NA_NA_dmso_chx	FALSE	0.279391	0.238984
PRJNA680364	SRR13120323	18915948	945797400	50	370	SRX9562386		OTHER	other	TRANSCRIPTOMIC	SINGLE	0	0	ILLUMINA	Illumina HiSeq 2000	SRP293929	PRJNA680364	35292784		SRS7766629	SAMN16878457	simple	9606	Homo sapiens	GSM4932277	GEO	SRA1162979	12	2021	Guzzi	H9 cells	H9 PUS7KO RPF replicate 1	RFP	1	KO						H9 PUS7		TRUE		auto	RFP_NA_1_NA_NA_NA_KO_H9 PUS7_NA_NA	FALSE	0.279376	0.0670958
PRJNA756018	SRR15513196	30979840	1095860084	35	429	SRX11811990		RNA-Seq	cDNA	TRANSCRIPTOMIC	SINGLE	0	0	ILLUMINA	NextSeq 500	SRP333128	PRJNA756018	35841888		SRS9826507	SAMN20849890	simple	9606	Homo sapiens	GSM5527721	GEO	SRA1280330	7	2022	Chothani	IL11 treated normal human fibroblast	Fibroblast_52 (RiboSeq)	RFP	1								auto_3017	TRUE		auto	RFP_NA_1_NA_NA_NA_NA_NA_auto_3017_NA	FALSE	0.279138	0.145071
GSE208041	SRR20106166	175658401	6177548746	35	2036	SRX16141477	GSM6333415	OTHER	other	TRANSCRIPTOMIC	SINGLE	0	0	ILLUMINA	Illumina NovaSeq 6000	SRP386079	PRJNA858047	36284713		SRS13803502	SAMN29661004	simple	9606	Homo sapiens	GSM6333415	AG Uhlenhaut, Institute for Diabetes and Endocrinology (IDE), Helmholz Zentrum MÃ¼nchen	SRA1453914	10	2022	Ansari	THP-1	THP-1 cells, Riboseq/Vehicle, 3h, rep3	RFP	3				3h	blood	THP1		Vehicle	TRUE		Michal	RFP_NA_3_3h_blood_THP1_NA_NA_Vehicle_NA	FALSE	0.279079	1.2754
PRJNA589466	SRR10441369					SRX7136115		RNA-Seq	cDNA		SINGLE			ILLUMINA		SRP229759	PRJNA589466	32821933	589466	SRS5645033	SAMN13281626			Homo sapiens	GSM4160137	GEO	SRA995632	8	2020	Patel	miR-122 expressing cells	miR-122 expressing cells rep 2 [Ribo-seq]	RFP	2	OE	chx			kidney	HEK293		mi122	TRUE		PREETI	RFP_NA_2_NA_kidney_HEK293_OE_NA_mi122_chx	FALSE	0.278221	0.429824
PRJEB26593	ERR2603017					ERX2619673	Ribosome profiling (RiboSeq) of ribosome footprints from LoVo cells at time 0h (mock infection), replicate 2	RNA-Seq	size fractionation		SINGLE			ILLUMINA		ERP108595	PRJEB26593	32584699	635830	ERS2518596	SAMEA4698424			Homo sapiens	0h-r2	INSTITUT DE BIOLOGIE DE ECOLE NORMALE SUPERIEURE (	ERA1502185	5	2020	Besic	epithelial colon adenocarcinoma	Non-infected LoVo cells, Replicate 2	RFP	2	WT	chx			colon	LoVo			TRUE		PREETI	RFP_NA_2_NA_colon_LoVo_WT_NA_NA_chx	FALSE	0.27821	1.99846
PRJNA523167	SRR8590758					SRX5391041		RNA-Seq	cDNA		SINGLE			ILLUMINA		SRP186252	PRJNA523167	31911279	523167	SRS4378982	SAMN10965475			Homo sapiens	GSM3611928	GEO	SRA850276	12	2019	Vaklavas	adult human female breast	HMECs Serum Deprived 24 hours ribosome protected fragments	RFP	1	deprived	chx		24h	breast	HMEC			TRUE		TESHOME	RFP_NA_1_24h_breast_HMEC_deprived_NA_NA_chx	FALSE	0.278207	0.04054
PRJNA701951	SRR13712449	34454451	1757177001	51	595	SRX10101225		RNA-Seq	cDNA	TRANSCRIPTOMIC	SINGLE	0	0	ILLUMINA	NextSeq 500	SRP306464	PRJNA701951	35388737		SRS8258258	SAMN17917998	simple	9606	Homo sapiens	GSM5082463	GEO	SRA1196414	4	2022	Hisaoka	HCT116	WT_NCS_RPF_rep4	RFP	4	WT				colon	HCT116		auto_2558	TRUE		auto	RFP_NA_4_NA_colon_HCT116_WT_NA_auto_2558_NA	FALSE	0.278151	0.110743
PRJNA147613	SRR648669					SRX217030		RNA-Seq	other		SINGLE			ILLUMINA		SRP017942	PRJNA147613	23290915	147613	SRS385797	SAMN01886425			Homo sapiens	GSM1063577	GEO	SRA064749	7	2015	Shalgi	293T cells	293T_Hspa1a	RFP			chx			kidney	HEK293		HSPA1A	TRUE		HÃ…KON	RFP_NA_NA_NA_kidney_HEK293_NA_NA_HSPA1A_chx	FALSE	0.278083	0.169639
PRJNA262009	SRR1585490					SRX709833		RNA-Seq	cDNA		SINGLE			ILLUMINA		SRP047476	PRJNA262009	25657249	262009	SRS708850	SAMN03079252			Homo sapiens	GSM1513191	GEO	SRA185822	7	2015	Battle	lymphoblastoid cell lines derived fromHapMap Yoruba individual	GM18502	RFP	5		frozen			bone	LCL		cyto	TRUE		HÃ…KON	RFP_NA_5_NA_bone_LCL_NA_NA_cyto_frozen	FALSE	0.277709	0.163551
PRJNA396698	SRR5886317	73508643	5586656868	76	1922	SRX3052236		OTHER	other	TRANSCRIPTOMIC	SINGLE	0	0	ILLUMINA	NextSeq 500	SRP114504	PRJNA396698	30449621		SRS2398664	SAMN07431145	simple	9606	Homo sapiens	GSM2724036	GEO	SRA595098	11	2018	Arango	HeLa cells, Ribosome Protected RNA	WT_Ribo-seq_BioRep_1 (protected RNA)	RFP	2	WT				ovary	HeLa			TRUE		auto	RFP_NA_2_NA_ovary_HeLa_WT_NA_NA_NA	FALSE	0.277687	0.241019
PRJNA707431	SRR13884550	73036534	2310479369	31	1309	SRX10264851		OTHER	other	TRANSCRIPTOMIC	SINGLE	0	0	ILLUMINA	Illumina NovaSeq 6000	SRP309704	PRJNA707431	35137207		SRS8398479	SAMN18205153	simple	9606	Homo sapiens	GSM5140273	GEO	SRA1203922	7	2021	Luan	Cell line:A549	siL36.Riboseq	RFP	1					lung	A549		auto_2628	TRUE		auto	RFP_NA_1_NA_lung_A549_NA_NA_auto_2628_NA	FALSE	0.277603	0.112938
PRJNA257365	SRR1535545					SRX668711		RNA-Seq	cDNA		SINGLE			ILLUMINA		SRP045214	PRJNA257365	25989971	257365	SRS673074	SAMN02950961			Homo sapiens	GSM1464104	GEO	SRA177782	7	2015	Rutkowski	Ribosome profiling	RP 4 h p.i. - Rep 2	RFP	3		chx	2	4h	skin	NONE			TRUE		HÃ…KON	RFP_2_3_4h_skin_NONE_NA_NA_NA_chx	FALSE	0.277307	0.0234834
PRJNA300627	SRR2873539					SRX1402247		OTHER	other		SINGLE			ILLUMINA		SRP065528	PRJNA300627	26878238	300627	SRS1141526	SAMN04226648			Homo sapiens	GSM1921993	GEO	SRA308231	2	2016	Loayza-Puch	PC3 cell line	PC3 ASNase 2 batch2 RP	RFP	4	ASNase	chx	2		prostate	PC3		ASNase	TRUE		KORNEL	RFP_2_4_NA_prostate_PC3_ASNase_NA_ASNase_chx	FALSE	0.277296	0.807936
PRJNA251587	SRR1333393					SRX569214		RNA-Seq	cDNA		SINGLE			ILLUMINA		SRP042937	PRJNA251587	25510491	251587	SRS627192	SAMN02837522			Homo sapiens	GSM1403307	GEO	SRA169092	12	2014	CrappÃ©	Colorectal carcinoma cell line	Cycloheximide treated HCT116	RFP	1		chx			colon	HCT116			TRUE		HÃ…KON	RFP_NA_1_NA_colon_HCT116_NA_NA_NA_chx	FALSE	0.276969	0.581691
PRJNA453686	SRR7067556					SRX3998357		RNA-Seq	cDNA		SINGLE			ILLUMINA		SRP142722	PRJNA453686	30305285	453686	SRS3222377	SAMN08985506			Homo sapiens	GSM3112195	GEO	SRA695700	1	2019	Krishnamoorthy	C643	C643_RP_3	RFP	3		chx			thyroid	C643			TRUE		TESHOME	RFP_NA_3_NA_thyroid_C643_NA_NA_NA_chx	FALSE	0.276845	0.146454
PRJNA314248	SRR3398188					SRX1704873		OTHER	other		SINGLE			ILLUMINA		SRP071216	PRJNA314248	31549036	314248	SRS1396985	SAMN04625644			Homo sapiens	Ribosome Profiling (HEK293T, Methionine Starvation)	CORNELL UNIVERSITY	SRA378655	3	2016	Wan		HEK293T cells for Ribosome profiling (Methionine Starvation)	RFP		starved	chx			kidney	HEK293		methio	TRUE		HÃ…KON	RFP_NA_NA_NA_kidney_HEK293_starved_NA_methio_chx	FALSE	0.276277	0.0316659
PRJNA497255	SRR8070866					SRX4898857		OTHER	other		SINGLE			ILLUMINA		SRP165989	PRJNA497255		497255	SRS3945343	SAMN10251877			Homo sapiens	GSM3434470	GEO	SRA795385	6	2019	Choi	U2OS cells	U2OS_siCtl_A_RPF	RFP	1	ctrl	chx			bone	U2OS			TRUE		TESHOME	RFP_NA_1_NA_bone_U2OS_ctrl_NA_NA_chx	FALSE	0.276179	0.261659
PRJNA314508	SRR3208865					SRX1617546		RNA-Seq	cDNA		SINGLE			ILLUMINA		SRP071232	PRJNA314508	27655340	314508	SRS1326924	SAMN04536273			Homo sapiens	GSM2082522	GEO	SRA379359	7	2016	Grabole	TSC2+/+ control generated from hESC cell line 2, RPF	Ribosome protected fragments (RPF) of TSC2+/+ control generated from hESC cell line 2, Biological Replicate 2	RFP	2	p_p	chx	2		skin	TSC2			TRUE		KORNEL	RFP_2_2_NA_skin_TSC2_p_p_NA_NA_chx	FALSE	0.275967	0.968012
PRJNA602917	SRR10959087					SRX7625186		OTHER	other		SINGLE			ILLUMINA		SRP244436	PRJNA602917	32668236	602917	SRS6057079	SAMN13910616			Homo sapiens	GSM4282352	GEO	SRA1030824	7	2020	Zhu	HCT116 colon cancer cell line	Ribosome profiling_sgABCE1-1	RFP	1	KO	chx			colon	HCT116			TRUE		PREETI	RFP_NA_1_NA_colon_HCT116_KO_NA_NA_chx	FALSE	0.27555	0.0734663
PRJNA318051	SRR3356528					SRX1690319		RNA-Seq	cDNA		SINGLE			ILLUMINA		SRP073116	PRJNA318051	31549036	318051	SRS1384311	SAMN04632618			Homo sapiens	GSM2113585	GEO	SRA409072	4	2016	Wan	Human Embryonic Kidney Cells	Ribo-Seq (HEK393T, Methionine Starvation)	RFP	1	MS	chx			kidney	HEK293		methionine_starvation	TRUE		KORNEL	RFP_NA_1_NA_kidney_HEK293_MS_NA_methionine_starvation_chx	FALSE	0.275392	0.0338487
PRJNA707431	SRR13884532	85543916	2697474720	31	1183	SRX10264933		OTHER	other	TRANSCRIPTOMIC	SINGLE	0	0	ILLUMINA	Illumina NovaSeq 6000	SRP309704	PRJNA707431	35137207		SRS8398565	SAMN18205364	simple	9606	Homo sapiens	GSM5140255	GEO	SRA1203922	7	2021	Luan	Cell line:A549	siL19.Riboseq	RFP	1					lung	A549		auto_2674	TRUE		auto	RFP_NA_1_NA_lung_A549_NA_NA_auto_2674_NA	FALSE	0.275262	0.244884
PRJNA634332	SRR11825728					SRX8376256	1R1	RNA-Seq	PCR		SINGLE			ILLUMINA		SRP262616	PRJNA634332	30920299	634332	SRS6691022	SAMN14988431			Homo sapiens	1R_S5_L001_R1_001	FOOD AND DRUG ADMINISTRATION	SRA1078014	5	2020	Hettiarachchi	primary Hepatocytes	1R1	RFP	1	WT	frozen		0min	liver	hepato			TRUE		PREETI	RFP_NA_1_0min_liver_hepato_WT_NA_NA_frozen	FALSE	0.275188	0.244876
PRJNA576651	SRR10251304					SRX6969310		RNA-Seq	cDNA		SINGLE			ILLUMINA		SRP224954	PRJNA576651	31971508	576651	SRS5494876	SAMN13000239			Homo sapiens	GSM4114798	GEO	SRA975936	1	2020	Wangen	Untreated ribosome profiling B	RPF_24_G418rep2_2_Untr_B	RFP	2		chx	2		kidney	HEK293		untreated	TRUE		PREETI	RFP_2_2_NA_kidney_HEK293_NA_NA_untreated_chx	FALSE	0.27511	0.0988548
PRJNA439265	SRR6869754					SRX3824009		RNA-Seq	cDNA		SINGLE			ILLUMINA		SRP136094	PRJNA439265	31174582	439265	SRS3073337	SAMN08743010			Homo sapiens	GSM3057211	GEO	SRA668547	5	2019	BornelÃ¶v	H9 cells	Riboseq self-renewing rep4	RFP	4		chx			blood	H9		renewal	TRUE		TESHOME	RFP_NA_4_NA_blood_H9_NA_NA_renewal_chx	FALSE	0.274718	0.0596287
PRJNA707431	SRR13884582	33062967	994398320	30	336	SRX10264867		OTHER	other	TRANSCRIPTOMIC	SINGLE	0	0	ILLUMINA	Illumina NovaSeq 6000	SRP309704	PRJNA707431	35137207		SRS8398494	SAMN18205125	simple	9606	Homo sapiens	GSM5140305	GEO	SRA1203922	7	2021	Luan	Cell line:A549	siS8_14_2.Riboseq	RFP	1					lung	A549		auto_2636	TRUE		auto	RFP_NA_1_NA_lung_A549_NA_NA_auto_2636_NA	FALSE	0.274546	0.200978
PRJNA600267	SRR10859272	101623059	5081152950	50	2355	SRX7529369		OTHER	other	TRANSCRIPTOMIC	SINGLE	0	0	ILLUMINA	Illumina HiSeq 2500	SRP240955	PRJNA600267	35953468		SRS5968654	SAMN13810472	simple	9606	Homo sapiens	GSM4258235	GEO	SRA1023076	6	2022	Jungfleisch	whole cell	ER non-infected RPF, replicate 1	RFP	1				auto14				ER	TRUE		auto	RFP_NA_1_auto14_NA_NA_NA_NA_ER_NA	FALSE	0.274504	0.101751
PRJNA731488	SRR14605925	22509524	583330066	25	282	SRX10949056		OTHER	other	TRANSCRIPTOMIC	SINGLE	0	0	ILLUMINA	Illumina HiSeq 4000	SRP320683	PRJNA731488	34876589		SRS9027928	SAMN19287231	simple	9606	Homo sapiens	GSM5326930	GEO	SRA1234845	11	2021	Kashiwagi	HEK293 T-REx	Ribo_mut_DMSO1	RFP	1				auto60	kidney	HEK293		dmso	TRUE		auto	RFP_NA_1_auto60_kidney_HEK293_NA_NA_dmso_NA	FALSE	0.274284	0.0772782
PRJNA182756	SRR627626					SRX207951		OTHER	other		SINGLE			ILLUMINA		SRP017378	PRJNA182756	23594524	182756	SRS377852	SAMN01821862			Homo sapiens	GSM1047590	GEO	SRA062117	3	2013	Loayza-Puch	Immortalized primary fibroblasts	C3.rp	RFP	3	S	chx			skin	BJ		RASG12V	TRUE		HÃ…KON	RFP_NA_3_NA_skin_BJ_S_NA_RASG12V_chx	FALSE	0.273999	0.12663
PRJNA414611	SRR6181564					SRX3292096		OTHER	other		SINGLE			ILLUMINA		SRP120157	PRJNA414611	30591072	414611	SRS2601275	SAMN07795677			Homo sapiens	GSM2817687	GEO	SRA620345	4	2018	Murat	ATCC Cell Lines	RPF_DHX9_1	RFP	1		chx	2		ovary	HeLa		DHX9	TRUE		TESHOME	RFP_2_1_NA_ovary_HeLa_NA_NA_DHX9_chx	FALSE	0.273626	0.526666
PRJNA278009	SRR1910735					SRX952425		RNA-Seq	cDNA		SINGLE			ILLUMINA		SRP056098	PRJNA278009	26147685	278009	SRS872583	SAMN03401169			Homo sapiens	GSM1632598	GEO	SRA246404	6	2015	Su	human primary macrophages	Mock RPF replicate 2	RFP	2	mock	chx			blood	macrophage			TRUE		KORNEL	RFP_NA_2_NA_blood_macrophage_mock_NA_NA_chx	FALSE	0.273227	0.0263593
PRJNA576260	SRR10240646					SRX6959648		OTHER	other		SINGLE			ILLUMINA		SRP224660	PRJNA576260	32066800	576260	SRS5486441	SAMN12985341			Homo sapiens	GSM4110760	GEO	SRA974338	1	2020	Haas	hTERT-RPE-1	RPF_control_rep3	RFP	3	WT	chx			eye	hTERT_RPE1			TRUE		PREETI	RFP_NA_3_NA_eye_hTERT_RPE1_WT_NA_NA_chx	FALSE	0.273149	0.25952
PRJNA707431	SRR13884604	54986199	1711477113	31	883	SRX10264941		OTHER	other	TRANSCRIPTOMIC	SINGLE	0	0	ILLUMINA	Illumina NovaSeq 6000	SRP309704	PRJNA707431	35137207		SRS8398572	SAMN18205187	simple	9606	Homo sapiens	GSM5140327	GEO	SRA1203922	7	2021	Luan	Cell line:A549	siS23.Riboseq	RFP	1					lung	A549		auto_2682	TRUE		auto	RFP_NA_1_NA_lung_A549_NA_NA_auto_2682_NA	FALSE	0.273054	0.733029
PRJNA292112	SRR5512737					SRX2786688		OTHER	other		SINGLE			ILLUMINA		SRP062129	PRJNA292112	29950183	292112	SRS2168668	SAMN06894526			Homo sapiens	GSM2601311	GEO	SRA282463	5	2018	Wang	HapMap	GM19144 ribosome protected fragments	RFP			frozen			blood	lymphoblastoid		GM19144	TRUE		KORNEL	RFP_NA_NA_NA_blood_lymphoblastoid_NA_NA_GM19144_frozen	FALSE	0.272835	0.213204
PRJNA275386	SRR1803191					SRX876768		OTHER	other		SINGLE			ILLUMINA		SRP055009	PRJNA275386	26297486	275386	SRS845382	SAMN03343995			Homo sapiens	GSM1609422	GEO	SRA241011	2	2015	Cenik	EBV-transformed lymphoblastoid cells	GM19240_Rep2	RFP	2		chx			bone	LCL		GM19240	TRUE		KORNEL	RFP_NA_2_NA_bone_LCL_NA_NA_GM19240_chx	FALSE	0.27275	0.0759435
PRJNA602876	SRR10957155					SRX7623309		RNA-Seq	cDNA		SINGLE			ILLUMINA		SRP244347	PRJNA602876	34272367	602876	SRS6055240	SAMN13909716			Homo sapiens	GSM4282037	GEO	SRA1030642	12	2020	Green	HEK293T_G418 500 ug/mL ribosome profiling	G418 500 ug/mL ribosome profiling C	RFP	3		chx			kidney	HEK293		NMDinhibitor	TRUE		PREETI	RFP_NA_3_NA_kidney_HEK293_NA_NA_NMDinhibitor_chx	FALSE	0.272687	0.256988
PRJEB28810	ERR2812347					ERX2819178	human_brain_ribo_2_s	RNA-Seq	other		SINGLE			ILLUMINA		ERP111066	PRJEB28810		575406	ERS2758369	SAMEA4939586			Homo sapiens	SAMEA4939586	Lausanne Genomic Technologies Facility, Lausanne, Switzerland	ERA1612101	10	2019	Wang		E-MTAB-7247:human_brain_ribo_2	RFP	2		chx			brain	NONE			TRUE		PREETI	RFP_NA_2_NA_brain_NONE_NA_NA_NA_chx	FALSE	0.272355	0.536196
PRJNA533132	SRR8915509	36501237	2774094012	76	993	SRX5696963		OTHER	other	TRANSCRIPTOMIC	SINGLE	0	0	ILLUMINA	NextSeq 500	SRP192770	PRJNA533132	1		SRS4636171	SAMN11440441	simple	9606	Homo sapiens	GSM3724996	GEO	SRA875251	8	2022	Makar	ribosome profiling	LogPhase_polysome_rep.1	RFP	1								auto_1343	TRUE		auto	RFP_NA_1_NA_NA_NA_NA_NA_auto_1343_NA	FALSE	0.272264	0.133744
PRJNA344393	SRR4293696					SRX2189159		OTHER	other		SINGLE			ILLUMINA		SRP090415	PRJNA344393	28541577	344393	SRS1711881	SAMN05821923			Homo sapiens	GSM2327828	GEO	SRA478929	1	2017	Fijalkowska	colorectal carcinoma cell line	Ribosome profiling of control HCT116 cells treated with cycloheximide	RFP	1	WT	chx			colon	HCT116			TRUE		KORNEL	RFP_NA_1_NA_colon_HCT116_WT_NA_NA_chx	FALSE	0.272039	0.420687
PRJNA729866	SRR14525704	119650833	14980817417	125	4326	SRX10870518		OTHER	other	TRANSCRIPTOMIC	SINGLE	0	0	ILLUMINA	Illumina NovaSeq 6000	SRP319885	PRJNA729866	35033535		SRS8967539	SAMN19163266	simple	9606	Homo sapiens	GSM5310248	GEO	SRA1232026	5	2021	Sepich-Poore	HepG2	WT1 RPF	RFP	1	WT				liver	HepG2			TRUE		auto	RFP_NA_1_NA_liver_HepG2_WT_NA_NA_NA	FALSE	0.272005	0.269116
PRJNA213675	SRR944653					SRX329059		OTHER	other		SINGLE			ILLUMINA		SRP028325	PRJNA213675	23453015	213675	SRS465169	SAMN02297657			Homo sapiens	GSM1197612	GEO	SRA096240	7	2015	Niu	HeLa cell	Ribosome profiling rep1-SiControl-RPF C1	RFP	1	WT	chx			ovary	HeLa			TRUE		HÃ…KON	RFP_NA_1_NA_ovary_HeLa_WT_NA_NA_chx	FALSE	0.271676	0.08604
PRJNA438445	SRR6838651					SRX3794516		OTHER	other		SINGLE			ILLUMINA		SRP135757	PRJNA438445	30102689	438445	SRS3047464	SAMN08716641			Homo sapiens	GSM3042964	GEO	SRA666737	7	2018	Lauria	MCF-7 cells, ribosome profiling (RIBO_seq)	MCF7_RIBOseq	RFP			chx			breast	MCF7			TRUE		TESHOME	RFP_NA_NA_NA_breast_MCF7_NA_NA_NA_chx	FALSE	0.271675	0.0458402
PRJNA548813	SRR9300369					SRX6069662		OTHER	other		SINGLE			ILLUMINA		SRP201395	PRJNA548813	31340047	548813	SRS4971937	SAMN12056125			Homo sapiens	GSM3890771	GEO	SRA899165	7	2019	Chang	HEK293T	XRN1-null replicate 2 for Ribo-seq	RFP	2	KO	chx			kidney	HEK293			TRUE		TESHOME	RFP_NA_2_NA_kidney_HEK293_KO_NA_NA_chx	FALSE	0.271656	0.134018
PRJNA809587	SRR18113797	17920317	2688047550	150	972	SRX14264381	GSM5911796	OTHER	other	TRANSCRIPTOMIC	SINGLE	0	0	ILLUMINA	Illumina NovaSeq 6000	SRP361145	PRJNA809587	36074823		SRS12083341	SAMN26199027	simple	9606	Homo sapiens	GSM5911796	Wei Xie, School of Life Sciences, Tsinghua University	SRA1376840	10	2022	Zou	Embryonic stem cell	h_H1_hESC_1000_Ribo_rep2	RFP	1								auto_3332	TRUE		auto	RFP_NA_1_NA_NA_NA_NA_NA_auto_3332_NA	FALSE	0.271582	0.0699127
PRJNA272597	SRR1758409					SRX842659		RNA-Seq	cDNA		SINGLE			ILLUMINA		SRP052229	PRJNA272597	26729373	272597	SRS818833	SAMN03284282			Homo sapiens	GSM1585241	GEO	SRA231648	1	2016	Xu	Human fibroblast	8_corr l-leucine rep3 RPF	RFP	3	CORR	chx	2		fibroblast	NONE		lLeucine	TRUE		KORNEL	RFP_2_3_NA_fibroblast_NONE_CORR_NA_lLeucine_chx	FALSE	0.271515	0.725748
PRJNA257365	SRR1535517					SRX668702		RNA-Seq	cDNA		SINGLE			ILLUMINA		SRP045214	PRJNA257365	25989971	257365	SRS673065	SAMN02950952			Homo sapiens	GSM1464095	GEO	SRA177782	7	2015	Rutkowski	Ribosome profiling	RP mock - Rep 1	RFP	2	WT	chx	1		skin	NONE			TRUE		HÃ…KON	RFP_1_2_NA_skin_NONE_WT_NA_NA_chx	FALSE	0.271506	0.0536305
PRJNA556267	SRR9737070	46938088	2393842488	51	728	SRX6494016		OTHER	other	TRANSCRIPTOMIC	SINGLE	0	0	ILLUMINA	Illumina HiSeq 4000	SRP216083	PRJNA556267	32348767		SRS5142585	SAMN12346086	simple	9606	Homo sapiens	GSM3966949	GEO	SRA925389	1	2020	Groenke	Transfected HEK 293T cells	Ribosome profiling from 27wt/72Lmax/27min Replicate 1	RFP	1	WT				kidney	HEK293			TRUE		auto	RFP_NA_1_NA_kidney_HEK293_WT_NA_NA_NA	FALSE	0.271319	0.131524
PRJNA453915	SRR7073146					SRX4003594		RNA-Seq	cDNA		SINGLE			ILLUMINA		SRP143452	PRJNA453915	30029003	453915	SRS3225396	SAMN08993023			Homo sapiens	GSM3118953	GEO	SRA696853	7	2018	Darnell	HEK293T cells, ATCC CRL-3216 + AAVS1:Flag-RagB-Q99L	ragbq99l_arg_6h	RFP			chx		6h	kidney	HEK293		ragbq99l_arg	TRUE		TESHOME	RFP_NA_NA_6h_kidney_HEK293_NA_NA_ragbq99l_arg_chx	FALSE	0.271184	0.0519449
PRJNA472636	SRR7207270					SRX4116254		OTHER	other		SINGLE			ILLUMINA		SRP148767	PRJNA472636	30089253	472636	SRS3331542	SAMN09238873			Homo sapiens	GSM3150282	GEO	SRA709715	7	2018	Gameiro	Breast epithelial cell	EtOH_NoBCAA_04hr.2	RFP	2	NoBCAA	chx		4h	breast	MCF10A		EtOH	TRUE		TESHOME	RFP_NA_2_4h_breast_MCF10A_NoBCAA_NA_EtOH_chx	FALSE	0.270748	0.0545884
GSE208041	SRR20106164	164056434	5789863066	35	1890	SRX16141479	GSM6333417	OTHER	other	TRANSCRIPTOMIC	SINGLE	0	0	ILLUMINA	Illumina NovaSeq 6000	SRP386079	PRJNA858047	36284713		SRS13803504	SAMN29661002	simple	9606	Homo sapiens	GSM6333417	AG Uhlenhaut, Institute for Diabetes and Endocrinology (IDE), Helmholz Zentrum MÃ¼nchen	SRA1453914	10	2022	Ansari	THP-1	THP-1 cells, Riboseq/Vehicle, 3h, rep5	RFP	5				3h	blood	THP1		Vehicle	TRUE		Michal	RFP_NA_5_3h_blood_THP1_NA_NA_Vehicle_NA	FALSE	0.269991	1.84823
PRJNA360112	SRR5144788					SRX2463230		RNA-Seq	cDNA		SINGLE			ILLUMINA		SRP096025	PRJNA360112	28108655	360112	SRS1895792	SAMN06203158			Homo sapiens	GSM2445297	GEO	SRA519510	1	2017	Malecki	Flp-In T-REx-293	METTL21B-2	RFP	2	KO	chx			kidney	HEK293			TRUE		KORNEL	RFP_NA_2_NA_kidney_HEK293_KO_NA_NA_chx	FALSE	0.269612	0.141272
PRJNA344393	SRR4293693					SRX2189156		OTHER	other		SINGLE			ILLUMINA		SRP090415	PRJNA344393	28541577	344393	SRS1711882	SAMN05821926			Homo sapiens	GSM2327825	GEO	SRA478929	1	2017	Fijalkowska	colorectal carcinoma cell line	Ribosome profiling of HCT116 cells upon eIF1 knockdown treated with lactimidomycin	RFP	1	KD	ltm			colon	HCT116			TRUE		KORNEL	RFP_NA_1_NA_colon_HCT116_KD_NA_NA_ltm	FALSE	0.269508	0.1535
PRJNA913269	SRR22767486	10632411	438753690	41	162	SRX18727925	GSM6846862	OTHER	other	TRANSCRIPTOMIC	SINGLE	0	0	ILLUMINA	Illumina NovaSeq 6000	SRP413563	PRJNA913269	1		SRS16168994	SAMN32275893	simple	9606	Homo sapiens	GSM6846862	Boston Children's Hospital	SRA1561149	2	2023	Makar	CD34+CD45RA-CD90+ cells, MYSM1 edited, day 5 post-nucleofection	MYSM1_ribosome_profiling_rep2	RFP	2								auto_3509	TRUE		auto	RFP_NA_2_NA_NA_NA_NA_NA_auto_3509_NA	FALSE	0.269485	0.0280254
PRJNA544411	SRR9113062					SRX5887326		OTHER	other		SINGLE			ILLUMINA		SRP199285	PRJNA544411	32139545	544411	SRS4809549	SAMN11835522			Homo sapiens	GSM3791723	GEO	SRA889795	3	2020	Chen	cell lysate	iPSC ribosome profiling, harringtonine-treated	RFP		WT	harr			skin	WTC11			TRUE		TESHOME	RFP_NA_NA_NA_skin_WTC11_WT_NA_NA_harr	FALSE	0.269348	0.377626
PRJNA275305	SRR1802139					SRX876056		OTHER	other		SINGLE			ILLUMINA		SRP054971	PRJNA275305	26900662	275305	SRS844816	SAMN03342126			Homo sapiens	GSM1608278	GEO	SRA240809	11	2015	Ji	Breast epithelial cell	ERSrcEtOH24hr_chx_rep2	RFP	2	KO	chx		24hr	breast	NONE		ER_SrcEtOH	TRUE		KORNEL	RFP_NA_2_24hr_breast_NONE_KO_NA_ER_SrcEtOH_chx	FALSE	0.269197	0.137399
PRJNA244941	SRR1257265					SRX522497		OTHER	other		SINGLE			ILLUMINA		SRP041298	PRJNA244941	26338483	244941	SRS594852	SAMN02730000			Homo sapiens	GSM1371483	GEO	SRA158793	8	2015	Jang	U2-OS Cells	Bmal1_kd_ribo_profile_CT08_rep2	RFP	2	KD	chx			bone	U2OS		CT08	TRUE		HÃ…KON	RFP_NA_2_NA_bone_U2OS_KD_NA_CT08_chx	FALSE	0.268549	0.170571
PRJNA439265	SRR6869753					SRX3824008		RNA-Seq	cDNA		SINGLE			ILLUMINA		SRP136094	PRJNA439265	31174582	439265	SRS3073336	SAMN08743011			Homo sapiens	GSM3057210	GEO	SRA668547	5	2019	BornelÃ¶v	H9 cells	Riboseq self-renewing rep3	RFP	3		chx			blood	H9		renewal	TRUE		TESHOME	RFP_NA_3_NA_blood_H9_NA_NA_renewal_chx	FALSE	0.268542	0.0935079
PRJNA701951	SRR13712447	31778436	1620700236	51	553	SRX10101223		RNA-Seq	cDNA	TRANSCRIPTOMIC	SINGLE	0	0	ILLUMINA	NextSeq 500	SRP306464	PRJNA701951	35388737		SRS8258256	SAMN17918000	simple	9606	Homo sapiens	GSM5082461	GEO	SRA1196414	4	2022	Hisaoka	HCT116	WT_Ctrl_RPF_rep4	RFP	4	WT				colon	HCT116			TRUE		auto	RFP_NA_4_NA_colon_HCT116_WT_NA_NA_NA	FALSE	0.268528	0.154751
PRJNA244941	SRR1257247					SRX522479		OTHER	other		SINGLE			ILLUMINA		SRP041298	PRJNA244941	26338483	244941	SRS594834	SAMN02730018			Homo sapiens	GSM1371465	GEO	SRA158793	8	2015	Jang	U2-OS Cells	WT_ribo_profile_CT20_rep2	RFP	2	WT	chx			bone	U2OS		CT20	TRUE		HÃ…KON	RFP_NA_2_NA_bone_U2OS_WT_NA_CT20_chx	FALSE	0.268501	0.10702
PRJNA625261	SRR11542155					SRX8112253		OTHER	other		SINGLE			ILLUMINA		SRP256332	PRJNA625261	33296667	625261	SRS6477338	SAMN14596009			Homo sapiens	GSM4475950	GEO	SRA1065150	12	2020	Chen	Malignant Melanoma	375_RocA0.3uM	RFP	1	0.3	chx			skin	A375		Rocalgamide	TRUE		PREETI	RFP_NA_1_NA_skin_A375_0.3_NA_Rocalgamide_chx	FALSE	0.268122	0.0367873
PRJNA314507	SRR3208921					SRX1617604		RNA-Seq	cDNA		SINGLE			ILLUMINA		SRP071235	PRJNA314507	27655340	314507	SRS1326957	SAMN04536294			Homo sapiens	GSM2082573	GEO	SRA379362	7	2016	Grabole	TSC2-/- cells (number 20) treated with DMSO, RPF	Ribosome protected fragments (RPF) of TSC2-/- cells (number 20) treated with DMSO, Biological Replicate 1	RFP	1	m_m	chx	20		skin	TSC2		dmso	TRUE		KORNEL	RFP_20_1_NA_skin_TSC2_m_m_NA_dmso_chx	FALSE	0.268098	1.04459
PRJNA870413	SRR21102193	60211969	3070810419	51	1227	SRX17115761	GSM6470182	OTHER	other	TRANSCRIPTOMIC	SINGLE	0	0	ILLUMINA	NextSeq 550	SRP392653	PRJNA870413	1		SRS14689938	SAMN30370408	simple	9606	Homo sapiens	GSM6470182	AG Teleman, B140, DKFZ	SRA1519790	2	2023	Makar	HeLa	R2_80S_siGFP	RFP	2	KO				ovary	HeLa	GFP		TRUE		HÃ¥kon	RFP_NA_2_NA_ovary_HeLa_KO_GFP_NA_NA	FALSE	0.268095	0.846068
PRJNA244941	SRR1257228					SRX522460		OTHER	other		SINGLE			ILLUMINA		SRP041298	PRJNA244941	26338483	244941	SRS594815	SAMN02730057			Homo sapiens	GSM1371446	GEO	SRA158793	8	2015	Jang	U2-OS Cells	WT_ribo_profile_CT06_rep1	RFP	1	WT	chx			bone	U2OS		CT06	TRUE		HÃ…KON	RFP_NA_1_NA_bone_U2OS_WT_NA_CT06_chx	FALSE	0.268016	0.326336
PRJNA414611	SRR6181560					SRX3292094		OTHER	other		SINGLE			ILLUMINA		SRP120157	PRJNA414611	30591072	414611	SRS2601273	SAMN07795665			Homo sapiens	GSM2817685	GEO	SRA620345	4	2018	Murat	ATCC Cell Lines	RPF_DHX36_2	RFP	2		chx	5		ovary	HeLa		DHX36	TRUE		TESHOME	RFP_5_2_NA_ovary_HeLa_NA_NA_DHX36_chx	FALSE	0.267008	0.157042
PRJNA707431	SRR13884562	78731407	2526729003	32	1124	SRX10264955		OTHER	other	TRANSCRIPTOMIC	SINGLE	0	0	ILLUMINA	Illumina NovaSeq 6000	SRP309704	PRJNA707431	35137207		SRS8398587	SAMN18205167	simple	9606	Homo sapiens	GSM5140285	GEO	SRA1203922	7	2021	Luan	Cell line:A549	siNC_22.Riboseq	RFP	1					lung	A549		auto_2694	TRUE		auto	RFP_NA_1_NA_lung_A549_NA_NA_auto_2694_NA	FALSE	0.266895	0.847322
PRJNA484941	SRR7655582					SRX4517982		OTHER	other		SINGLE			ILLUMINA		SRP156569	PRJNA484941		484941	SRS3636497	SAMN09779020			Homo sapiens	GSM3323390	GEO	SRA755020	9	2018	Volegova	HEK293T cells	HLH RP	RFP	3		chx			kidney	HEK293		HLHrp	TRUE		TESHOME	RFP_NA_3_NA_kidney_HEK293_NA_NA_HLHrp_chx	FALSE	0.266728	0.562506
PRJNA541324	SRR9019697	19152152	976759752	51	660	SRX5797793		RNA-Seq	cDNA	TRANSCRIPTOMIC	SINGLE	0	0	ILLUMINA	Illumina HiSeq 2000	SRP195632	PRJNA541324	31944153		SRS4728937	SAMN11582991	simple	9606	Homo sapiens	GSM3753515	GEO	SRA883373	1	2020	Lyabin	Human embryonic kidney	Ribo-Seq deltaYB-1 (RP_del), run 2	RFP	2					kidney			auto_1366	TRUE		auto	RFP_NA_2_NA_kidney_NA_NA_NA_auto_1366_NA	FALSE	0.266451	0.0814666
PRJNA256319	SRR1528651					SRX663268		OTHER	other		SINGLE			ILLUMINA		SRP044934	PRJNA256319	28274951	256319	SRS668142	SAMN02943097			Homo sapiens	GSM1446847	GEO	SRA176905	7	2017	Loayza-Puch	MCF10A TGFb 1 batch1 RP	MCF10A TGFb 1 batch1 RP	RFP	1		chx	1		breast	MCF10A		TGFb	TRUE		HÃ…KON	RFP_1_1_NA_breast_MCF10A_NA_NA_TGFb_chx	FALSE	0.26631	0.30543
PRJNA707431	SRR13884549	118089230	3773161945	31	1864	SRX10264850		OTHER	other	TRANSCRIPTOMIC	SINGLE	0	0	ILLUMINA	Illumina NovaSeq 6000	SRP309704	PRJNA707431	35137207		SRS8398477	SAMN18205154	simple	9606	Homo sapiens	GSM5140272	GEO	SRA1203922	7	2021	Luan	Cell line:A549	siL35A.Riboseq	RFP	1					lung	A549		auto_2627	TRUE		auto	RFP_NA_1_NA_lung_A549_NA_NA_auto_2627_NA	FALSE	0.266153	0.736311
PRJNA707431	SRR13884574	47203911	1513895037	32	698	SRX10264819		OTHER	other	TRANSCRIPTOMIC	SINGLE	0	0	ILLUMINA	Illumina NovaSeq 6000	SRP309704	PRJNA707431	35137207		SRS8398447	SAMN18205134	simple	9606	Homo sapiens	GSM5140297	GEO	SRA1203922	7	2021	Luan	Cell line:A549	siS3A.Riboseq	RFP	1					lung	A549		auto_2620	TRUE		auto	RFP_NA_1_NA_lung_A549_NA_NA_auto_2620_NA	FALSE	0.265739	0.385478
PRJNA300627	SRR2873538					SRX1402247		OTHER	other		SINGLE			ILLUMINA		SRP065528	PRJNA300627	26878238	300627	SRS1141526	SAMN04226648			Homo sapiens	GSM1921993	GEO	SRA308231	2	2016	Loayza-Puch	PC3 cell line	PC3 ASNase 2 batch2 RP	RFP	3	ASNase	chx	2		prostate	PC3		ASNase	TRUE		KORNEL	RFP_2_3_NA_prostate_PC3_ASNase_NA_ASNase_chx	FALSE	0.265422	0.940881
PRJNA806946	SRR18017746	34276147	1226823073	35	477	SRX14171969	GSM5899111	RNA-Seq	cDNA	TRANSCRIPTOMIC	SINGLE	0	0	ILLUMINA	NextSeq 2000	SRP359785	PRJNA806946	36433934		SRS11995932	SAMN25941491	simple	9606	Homo sapiens	GSM5899111	van Heesch, Princess Maxima Center	SRA1372962	12	2022	Palomar-Siles	epithelial	Ribo-Seq H1299-R213X-2	RFP	1								auto_3312	TRUE		auto	RFP_NA_1_NA_NA_NA_NA_NA_auto_3312_NA	FALSE	0.265228	0.16718
PRJNA414611	SRR6181546					SRX3292090		OTHER	other		SINGLE			ILLUMINA		SRP120157	PRJNA414611	30591072	414611	SRS2601269	SAMN07795657			Homo sapiens	GSM2817681	GEO	SRA620345	4	2018	Murat	ATCC Cell Lines	RPF_sc_2	RFP	2		chx	5		ovary	HeLa		sc	TRUE		TESHOME	RFP_5_2_NA_ovary_HeLa_NA_NA_sc_chx	FALSE	0.265103	0.194581
PRJEB5938	ERR466125					ERX432360	Extract 1	OTHER	other		SINGLE			ILLUMINA		ERP005378	PRJEB5938	25550424	272022	ERS426769	SAMEA2421581			Homo sapiens	SAMEA2421581	female	ERA295459	1	2015	Dundee		E-MTAB-2421:U2OS_RNaseI	RFP			chx			bone	U2OS		RNase1	TRUE		HÃ…KON	RFP_NA_NA_NA_bone_U2OS_NA_NA_RNase1_chx	FALSE	0.265	0.0338111
PRJNA604580	SRR11005885	35367218	1803728118	51	689	SRX7666679		RNA-Seq	cDNA	TRANSCRIPTOMIC	SINGLE	0	0	ILLUMINA	Illumina HiSeq 4000	SRP246901	PRJNA604580	32744504		SRS6094909	SAMN13975849	simple	9606	Homo sapiens	GSM4293617	GEO	SRA1036472	8	2020	Gaertner	Unmodified hESCs were differentiated to the PP2 stage	Hs_H1_BG98_3D_d11_ctrl_Riboseq_replicate1_1	RFP	1								auto_2119	TRUE		auto	RFP_NA_1_NA_NA_NA_NA_NA_auto_2119_NA	FALSE	0.264977	0.49578
PRJNA806946	SRR18017750	30839652	1109049666	35	434	SRX14171965	GSM5899107	RNA-Seq	cDNA	TRANSCRIPTOMIC	SINGLE	0	0	ILLUMINA	NextSeq 2000	SRP359785	PRJNA806946	36433934		SRS11995928	SAMN25941495	simple	9606	Homo sapiens	GSM5899107	van Heesch, Princess Maxima Center	SRA1372962	12	2022	Palomar-Siles	epithelial	Ribo-Seq H1299-EV5FUR-2	RFP	1								auto_3308	TRUE		auto	RFP_NA_1_NA_NA_NA_NA_NA_auto_3308_NA	FALSE	0.264957	0.18114
PRJEB33244	ERR3403481					ERX3427238	M2RPF_s	RNA-Seq	size fractionation		SINGLE			ILLUMINA		ERP116020	PRJEB33244		706227	ERS3547456	SAMEA5744169			Homo sapiens	E-MTAB-8100:M2RPF	Earlham Institute	ERA2022066	3	2021	Lezina	non-small cell lung carcinoma	M2RPF	RFP	2	KO_mutant	chx	1		lung	H1299	p53		TRUE		PREETI	RFP_1_2_NA_lung_H1299_KO_mutant_p53_NA_chx	FALSE	0.264828	0.246685
PRJNA501880	SRR8136737					SRX4957712		OTHER	other		SINGLE			ILLUMINA		SRP167245	PRJNA501880	30875366	501880	SRS3997742	SAMN10348613			Homo sapiens	GSM3452610	GEO	SRA800863	1	2019	Liaud	Huh7_1.5 ÂµM PF-067446846for 1 hr	1.5 ÂµM PF-067446846, 1 hr, rep 1	RFP	1	PF846	chx			liver	Huh7			TRUE		TESHOME	RFP_NA_1_NA_liver_Huh7_PF846_NA_NA_chx	FALSE	0.264656	0.248781
PRJNA448763	SRR6939948					SRX3884300		OTHER	other		SINGLE			ILLUMINA		SRP137150	PRJNA448763	31281537	448763	SRS3123572	SAMN08864566			Homo sapiens	GSM3081760	GEO	SRA681490	6	2019	Zou	normal_RPF	LC506_normal_RPF	RFP	7		chx			liver	NONE		normal	TRUE		TESHOME	RFP_NA_7_NA_liver_NONE_NA_NA_normal_chx	FALSE	0.26465	0.0983799
PRJNA287112	SRR2064020					SRX1059596		RNA-Seq	cDNA		SINGLE			ILLUMINA		SRP059531	PRJNA287112	26599541	287112	SRS961861	SAMN03776552			Homo sapiens	GSM1712274	GEO	SRA273059	11	2015	Tirosh	footprints fibroblasts infected for 5hr	footprints fibroblasts infected for 5hr	RFP		infected	chx		5hr	fibroblast	NONE			TRUE		KORNEL	RFP_NA_NA_5hr_fibroblast_NONE_infected_NA_NA_chx	FALSE	0.264455	0.44674
PRJNA707431	SRR13884564	60965656	1905393006	31	846	SRX10264957		OTHER	other	TRANSCRIPTOMIC	SINGLE	0	0	ILLUMINA	Illumina NovaSeq 6000	SRP309704	PRJNA707431	35137207		SRS8398588	SAMN18205166	simple	9606	Homo sapiens	GSM5140287	GEO	SRA1203922	7	2021	Luan	Cell line:A549	siNC3.Riboseq	RFP	1					lung	A549		auto_2696	TRUE		auto	RFP_NA_1_NA_lung_A549_NA_NA_auto_2696_NA	FALSE	0.264454	0.20666
PRJNA297338	SRR2536857					SRX1295655		OTHER	other		SINGLE			ILLUMINA		SRP064313	PRJNA297338	26898226	297338	SRS1094439	SAMN04122436			Homo sapiens	GSM1898019	GEO	SRA302029	9	2016	Zur	HeLa S3_G1_Ribo-Seq Exp1	G1 Ribo-Seq Exp1 Rep2	RFP	1	G1	chx	1		ovary	HeLa		Rep2	TRUE		KORNEL	RFP_1_1_NA_ovary_HeLa_G1_NA_Rep2_chx	FALSE	0.264419	2.14627
PRJNA667952	SRR12790142	145464686	7127769614	49	4534	SRX9259297		OTHER	other	TRANSCRIPTOMIC	SINGLE	0	0	ILLUMINA	Illumina HiSeq 2500	SRP286677	PRJNA667952	33597240		SRS7490390	SAMN16392791	simple	9606	Homo sapiens	GSM4822828	GEO	SRA1140064	12	2020	Dong	Human embryonic kidney cells	Ribo_seq_shFTO_rep2	RFP	2					kidney			auto_2401	TRUE		auto	RFP_NA_2_NA_kidney_NA_NA_NA_auto_2401_NA	FALSE	0.264413	0.386201
PRJNA244941	SRR1257266					SRX522498		OTHER	other		SINGLE			ILLUMINA		SRP041298	PRJNA244941	26338483	244941	SRS594853	SAMN02730003			Homo sapiens	GSM1371484	GEO	SRA158793	8	2015	Jang	U2-OS Cells	Bmal1_kd_ribo_profile_CT10_rep2	RFP	2	KD	chx			bone	U2OS		CT10	TRUE		HÃ…KON	RFP_NA_2_NA_bone_U2OS_KD_NA_CT10_chx	FALSE	0.264375	0.211395
PRJNA515538	SRR8449578	115337841	5882229891	51	1981	SRX5256555		OTHER	other	TRANSCRIPTOMIC	SINGLE	0	0	ILLUMINA	Illumina HiSeq 2500	SRP179798	PRJNA515538	31819274		SRS4258061	SAMN10760871	simple	9606	Homo sapiens	GSM3566409	GEO	SRA835486	7	2019	Martinez	HeLa-S3 (Human Cervix Adenocarcinoma)	HeLa-S3_Ribo_HiRes_rep2	RFP	2					ovary	HeLa		auto_1263	TRUE		auto	RFP_NA_2_NA_ovary_HeLa_NA_NA_auto_1263_NA	FALSE	0.264307	0.962119
PRJNA396698	SRR5886319	77904165	5920716540	76	2020	SRX3052237		OTHER	other	TRANSCRIPTOMIC	SINGLE	0	0	ILLUMINA	NextSeq 500	SRP114504	PRJNA396698	30449621		SRS2398665	SAMN07431144	simple	9606	Homo sapiens	GSM2724037	GEO	SRA595098	11	2018	Arango	HeLa cells, Ribosome Protected RNA	WT_Ribo-seq_BioRep_2 (protected RNA)	RFP	2	WT				ovary	HeLa		auto_961	TRUE		auto	RFP_NA_2_NA_ovary_HeLa_WT_NA_auto_961_NA	FALSE	0.264284	0.225658
PRJNA576651	SRR10251303					SRX6969309		RNA-Seq	cDNA		SINGLE			ILLUMINA		SRP224954	PRJNA576651	31971508	576651	SRS5494875	SAMN13000240			Homo sapiens	GSM4114797	GEO	SRA975936	1	2020	Wangen	Untreated ribosome profiling A	RPF_23_G418rep2_1_Untr_A	RFP	2		chx	1		kidney	HEK293		untreated	TRUE		PREETI	RFP_1_2_NA_kidney_HEK293_NA_NA_untreated_chx	FALSE	0.264128	0.0785724
PRJNA707431	SRR13884584	79917441	2338468538	29	1065	SRX10264905		OTHER	other	TRANSCRIPTOMIC	SINGLE	0	0	ILLUMINA	Illumina NovaSeq 6000	SRP309704	PRJNA707431	35137207		SRS8398533	SAMN18205123	simple	9606	Homo sapiens	GSM5140307	GEO	SRA1203922	7	2021	Luan	Cell line:A549	siS9_2_2.Riboseq	RFP	1					lung	A549		auto_2654	TRUE		auto	RFP_NA_1_NA_lung_A549_NA_NA_auto_2654_NA	FALSE	0.264113	0.774491
PRJNA667952	SRR12790138	103846246	5088466054	49	2712	SRX9259293		OTHER	other	TRANSCRIPTOMIC	SINGLE	0	0	ILLUMINA	Illumina HiSeq 2500	SRP286677	PRJNA667952	33597240		SRS7490386	SAMN16392795	simple	9606	Homo sapiens	GSM4822824	GEO	SRA1140064	12	2020	Dong	Human embryonic kidney cells	Ribo_seq_shFTO_rep1	RFP	1					kidney			auto_2399	TRUE		auto	RFP_NA_1_NA_kidney_NA_NA_NA_auto_2399_NA	FALSE	0.264092	0.215248
PRJNA414611	SRR6181559					SRX3292094		OTHER	other		SINGLE			ILLUMINA		SRP120157	PRJNA414611	30591072	414611	SRS2601273	SAMN07795665			Homo sapiens	GSM2817685	GEO	SRA620345	4	2018	Murat	ATCC Cell Lines	RPF_DHX36_2	RFP	2		chx	4		ovary	HeLa		DHX36	TRUE		TESHOME	RFP_4_2_NA_ovary_HeLa_NA_NA_DHX36_chx	FALSE	0.263937	0.203622
PRJNA663848	SRR12651181					SRX9132405		OTHER	other		SINGLE			ILLUMINA		SRP282584	PRJNA663848	33556964	663848	SRS7374653	SAMN16179961			Homo sapiens	GSM4787160	GEO	SRA1126237	1	2021	Karasik	whole cell	AK004F: HeLa wt, 1 ÂµM tetramer 2-5A. 4.5 h	RFP	1	WT	chx		4.5h	ovary	HeLa		2to5A_1	TRUE		PREETI	RFP_NA_1_4.5h_ovary_HeLa_WT_NA_2to5A_1_chx	FALSE	0.263734	0.408032
PRJNA729461	SRR14510024	51445285	1269538088	24	536	SRX10855837		OTHER	other	TRANSCRIPTOMIC	SINGLE	0	0	ILLUMINA	Illumina NovaSeq 6000	SRP319472	PRJNA729461	34226921		SRS8951468	SAMN19116481	simple	9606	Homo sapiens	GSM5291868	GEO	SRA1231346	7	2021	Ichihara	HEK293T cells	WT HEK293T CHX replicate 1	RFP	1	WT	chx			kidney	HEK293			TRUE		auto	RFP_NA_1_NA_kidney_HEK293_WT_NA_NA_chx	FALSE	0.263592	0.113413
PRJNA263582	SRR1610257					SRX730878		OTHER	other		SINGLE			ILLUMINA		SRP048825	PRJNA263582	26399832	263582	SRS720055	SAMN03104431			Homo sapiens	GSM1523637	GEO	SRA189363	9	2015	Werner	hES cell, treated with sh targeting KBTBD8, ND 1d	ribo_ND1_shKBTBD8_replicate2	RFP	2	KO	chx	2	1d	embryonic	H1		KBTBD8	TRUE		KORNEL	RFP_2_2_1d_embryonic_H1_KO_NA_KBTBD8_chx	FALSE	0.263432	0.0347651
PRJNA275386	SRR1803182					SRX876759		OTHER	other		SINGLE			ILLUMINA		SRP055009	PRJNA275386	26297486	275386	SRS845388	SAMN03344006			Homo sapiens	GSM1609413	GEO	SRA241011	2	2015	Cenik	EBV-transformed lymphoblastoid cells	GM19139_Rep2	RFP	2		chx			bone	LCL		GM19139	TRUE		KORNEL	RFP_NA_2_NA_bone_LCL_NA_NA_GM19139_chx	FALSE	0.263186	0.0895362
PRJNA723012	SRR14275242	42786882	1402878791	32	606	SRX10636536		OTHER	other	TRANSCRIPTOMIC	SINGLE	0	0	ILLUMINA	NextSeq 500	SRP315393	PRJNA723012	1		SRS8732452	SAMN18797400	simple	9606	Homo sapiens	GSM5253072	GEO	SRA1220379	4	2023	Makar	Xenograft Cell Line	RPF MDA CRISPRi Ile GAT OE Ile TAT R2	RFP	1								auto_2745	TRUE		auto	RFP_NA_1_NA_NA_NA_NA_NA_auto_2745_NA	FALSE	0.262446	0.00873956
PRJNA472015	SRR7182552					SRX4099351		OTHER	other		SINGLE			ILLUMINA		SRP148422	PRJNA472015	30673779	472015	SRS3315536	SAMN09223522			Homo sapiens	GSM3146281	GEO	SRA706809	5	2018	Machkovech	A549 cells	ribosome footprints_ltm_vir	RFP			ltm			lung	A549		vir	TRUE		TESHOME	RFP_NA_NA_NA_lung_A549_NA_NA_vir_ltm	FALSE	0.262446	0.0239096
PRJNA591214	SRR10513634					SRX7201735	6R	RNA-Seq	PCR		SINGLE			ILLUMINA		SRP231304	PRJNA591214	33014344	591214	SRS5706996	SAMN13354210			Homo sapiens	6R_CTTGTA	FOOD AND DRUG ADMINISTRATION	SRA1001027	11	2019	Alexaki		Ribo-Seq CO3	RFP	3	CO	frozen			kidney	HEK293		F9	TRUE		PREETI	RFP_NA_3_NA_kidney_HEK293_CO_NA_F9_frozen	FALSE	0.262446	0.0114765
PRJNA523167	SRR8590757					SRX5391040		RNA-Seq	cDNA		SINGLE			ILLUMINA		SRP186252	PRJNA523167	31911279	523167	SRS4378980	SAMN10965476			Homo sapiens	GSM3611927	GEO	SRA850276	12	2019	Vaklavas	adult human female breast	HMECs Serum Deprived 1 hour ribosome protected fragments	RFP	2	deprived	chx		1h	breast	HMEC			TRUE		TESHOME	RFP_NA_2_1h_breast_HMEC_deprived_NA_NA_chx	FALSE	0.262446	0.0391552
PRJEB23298	ERR2189770					ERX2245885	EV_6hpi.rep1_s	OTHER	other		SINGLE			ILLUMINA		ERP105038	PRJEB23298		497718	ERS1992222	SAMEA104367244			Homo sapiens	SAMEA104367244	Dr. Valeria Lulla	ERA1125282	10	2018	Dinan		E-MTAB-6180:EV_6hpi.rep1	RFP	1	EV	chx		6h	muscle	RD			TRUE		TESHOME	RFP_NA_1_6h_muscle_RD_EV_NA_NA_chx	FALSE	0.262446	0.0246266
PRJNA701262	SRR13679814	15993724	799686200	50	309	SRX10069202		OTHER	other	TRANSCRIPTOMIC	SINGLE	0	0	ILLUMINA	Illumina HiSeq 2500	SRP305686	PRJNA701262	34213414		SRS8230930	SAMN17860373	simple	9606	Homo sapiens	GSM5074368	GEO	SRA1194491	7	2021	Xiang	HCT116 cells, OsTIR1 knock-in, AID-tagged PABPC1	HCT116_OsTIR1_PABPC1_AID_plus_IAA_1h_ribo_seq	RFP	1				1h	colon	HCT116			TRUE		auto	RFP_NA_1_1h_colon_HCT116_NA_NA_NA_NA	FALSE	0.262446	0.0123045
PRJNA605114	SRR12879067	24435464	891556355	36	623	SRX7685817		RNA-Seq	cDNA	TRANSCRIPTOMIC	SINGLE	0	0	ILLUMINA	Illumina HiSeq 3000	SRP247494	PRJNA605114	33053355		SRS6112320	SAMN14049752	simple	9606	Homo sapiens	GSM4299135	GEO	SRA1038955	10	2020	Weber	HEK293T	GIGYF1/2-null replicate 1 for Ribo-seq	RFP	1					kidney	HEK293		auto_2142	TRUE		auto	RFP_NA_1_NA_kidney_HEK293_NA_NA_auto_2142_NA	FALSE	0.262446	0.261085
PRJNA181016	SRR619088					SRX205666		RNA-Seq	size fractionation		SINGLE			ILLUMINA		SRP017263	PRJNA181016	23290916	181016	SRS376440	SAMN01816434			Homo sapiens	HEK293_DMSO	CORNELL	SRA061778	1	2013	Liu		HEK293_DMSO	RFP	1		chx			kidney	HEK293		dmso	TRUE		HÃ…KON	RFP_NA_1_NA_kidney_HEK293_NA_NA_dmso_chx	FALSE	0.262446	0.0196535
PRJNA576649	SRR10251274					SRX6969280		RNA-Seq	cDNA		SINGLE			ILLUMINA		SRP224952	PRJNA576649	31971508	576649	SRS5494846	SAMN13000202			Homo sapiens	GSM4114768	GEO	SRA975922	1	2020	Wangen	Untreated ribosome profiling B	RPF_2_allAG_2_Untr_B	RFP	2		chx			kidney	HEK293		untreated	TRUE		PREETI	RFP_NA_2_NA_kidney_HEK293_NA_NA_untreated_chx	FALSE	0.262446	0.0168172
PRJNA770962	SRR16312995	29535492	2215161900	75	817	SRX12591532	GSM5624311	RNA-Seq	cDNA	TRANSCRIPTOMIC	SINGLE	0	0	ILLUMINA	NextSeq 500	SRP341191	PRJNA770962	36302897		SRS10547167	SAMN22245325	simple	9606	Homo sapiens	GSM5624311	Meyerson Group, Cancer Program, Broad Institute of MIT and Harvard	SRA1489111	9	2022	Lee	Hela cell line	Hela_DMSO_RPF_Rep2	RFP	2					ovary	HeLa		dmso	TRUE		auto	RFP_NA_2_NA_ovary_HeLa_NA_NA_dmso_NA	FALSE	0.262446	0.0341295
PRJNA634332	SRR11825718					SRX8376266	2R1	RNA-Seq	PCR		SINGLE			ILLUMINA		SRP262616	PRJNA634332	30920299	634332	SRS6691032	SAMN14988435			Homo sapiens	2R_S6_L001_R1_001	FOOD AND DRUG ADMINISTRATION	SRA1078014	5	2020	Hettiarachchi	primary Hepatocytes	2R1	RFP	1		frozen		30min	liver	hepato			TRUE		PREETI	RFP_NA_1_30min_liver_hepato_NA_NA_NA_frozen	FALSE	0.262446	0.0141955
PRJNA285961	SRR2052937					SRX1050354		OTHER	other		SINGLE			ILLUMINA		SRP059187	PRJNA285961	29321322	285961	SRS954623	SAMN03763428			Homo sapiens	GSM1704529	GEO	SRA271639	9	2016	Reid	Huh7 cells	12 h infection cytosol ribosome profiling (Rep 3)	RFP	3	infected	chx		12hr	liver	Huh7		cyto	TRUE		KORNEL	RFP_NA_3_12hr_liver_Huh7_infected_NA_cyto_chx	FALSE	0.262446	0.014887
PRJNA515538	SRR8449580	39566395	2017886145	51	635	SRX5256557		OTHER	other	TRANSCRIPTOMIC	SINGLE	0	0	ILLUMINA	Illumina HiSeq 2500	SRP179798	PRJNA515538	31819274		SRS4258063	SAMN10760869	simple	9606	Homo sapiens	GSM3566411	GEO	SRA835486	7	2019	Martinez	K562 (Human Chronic Myelogenous Leukemia)	K562_Ribo_HiRes_rep2	RFP	2					bone	K562			TRUE		auto	RFP_NA_2_NA_bone_K562_NA_NA_NA_NA	FALSE	0.262446	0.0239787
PRJNA633047	SRR11794841					SRX8346814	KO rep2 mock RPF	OTHER	other		SINGLE			ILLUMINA		SRP261790	PRJNA633047	32839537	633047	SRS6663544	SAMN14931312			Homo sapiens	KO_rep2_mock_ribopro	UNIVERSITY OF WISCONSIN MADISON	SRA1075839	7	2020	Mehle		KO_rep2_mock_ribopro	RFP	2	KO	frozen			lung	A549			TRUE		PREETI	RFP_NA_2_NA_lung_A549_KO_NA_NA_frozen	FALSE	0.262446	0.151546
PRJNA659066	SRR12511459					SRX9002220	JR_SP2_RPI_5_mtIF3_KO.fq.gz	RNA-Seq	RT-PCR		SINGLE			ILLUMINA		SRP278682	PRJNA659066		659066	SRS5028751	SAMN12137828			Homo sapiens	GSM3905623	KI (KAROLINSKA INSTITUTET)	SRA1116651	8	2020	Rorbach	Human Embryonic Kidney_Flp-Inâ„¢ 293 T-REx	C6orf203 KO cells	RFP	2	KO	chx			kidney	HEK293		mitochondrial	TRUE		PREETI	RFP_NA_2_NA_kidney_HEK293_KO_NA_mitochondrial_chx	FALSE	0.262446	0.0254495
PRJNA477831	SRR7883755					SRX4721986		OTHER	other		SINGLE			ILLUMINA		SRP151279	PRJNA477831	30590705	477831	SRS3807070	SAMN10097081			Homo sapiens	GSM3396997	GEO	SRA728057	3	2019	Liu	iPSC	qc_sample_ipsc8_low_rnase	RFP	8	low	chx			embryonic	iPSC			TRUE		TESHOME	RFP_NA_8_NA_embryonic_iPSC_low_NA_NA_chx	FALSE	0.262446	0.0246375
PRJNA854905	SRR19918539	25663871	1283193550	50	617	SRX15961066	GSM6284786	OTHER	other	TRANSCRIPTOMIC	SINGLE	0	0	ILLUMINA	Illumina HiSeq 2500	SRP384536	PRJNA854905	35891396		SRS13647408	SAMN29472422	simple	9606	Homo sapiens	GSM6284786	Kamini Singh, Molecular Pharmacology, Albert Einstein College of Medicine	SRA1447869	7	2022	Singh	primary hNPC	A2_ribo	RFP	3					throat	NPC		auto_3452	TRUE		auto	RFP_NA_3_NA_throat_NPC_NA_NA_auto_3452_NA	FALSE	0.262446	0.0672028
PRJNA854905	SRR19918520	18891214	944560700	50	452	SRX15961068	GSM6284789	OTHER	other	TRANSCRIPTOMIC	SINGLE	0	0	ILLUMINA	Illumina HiSeq 2500	SRP384536	PRJNA854905	35891396		SRS13647410	SAMN29472419	simple	9606	Homo sapiens	GSM6284789	Kamini Singh, Molecular Pharmacology, Albert Einstein College of Medicine	SRA1447869	7	2022	Singh	primary hNPC	B3_ribo	RFP	2					throat	NPC		auto_3467	TRUE		auto	RFP_NA_2_NA_throat_NPC_NA_NA_auto_3467_NA	FALSE	0.262446	0.0345174
PRJNA854905	SRR19918489	13314087	665704350	50	328	SRX15961072	GSM6284788	OTHER	other	TRANSCRIPTOMIC	SINGLE	0	0	ILLUMINA	Illumina HiSeq 2500	SRP384536	PRJNA854905	35891396		SRS13647414	SAMN29472420	simple	9606	Homo sapiens	GSM6284788	Kamini Singh, Molecular Pharmacology, Albert Einstein College of Medicine	SRA1447869	7	2022	Singh	primary hNPC	A3_ribo	RFP	3					throat	NPC		auto_3476	TRUE		auto	RFP_NA_3_NA_throat_NPC_NA_NA_auto_3476_NA	FALSE	0.262446	0.0917859
PRJNA289569	SRR2096969					SRX1092017		OTHER	other		SINGLE			ILLUMINA		SRP060676	PRJNA289569	27058758	289569	SRS987644	SAMN03855831			Homo sapiens	GSM1819222	GEO	SRA276791	4	2016	Oh	HEK293	DDX3 R534H ribosome profiling with sodium arsenite rep1	RFP	1	OV	chx			kidney	HEK293		DDX3andR534H_arsenite	TRUE		KORNEL	RFP_NA_1_NA_kidney_HEK293_OV_NA_DDX3andR534H_arsenite_chx	FALSE	0.262446	0.0176429
PRJNA257365	SRR1535550					SRX668713		RNA-Seq	cDNA		SINGLE			ILLUMINA		SRP045214	PRJNA257365	25989971	257365	SRS673076	SAMN02950963			Homo sapiens	GSM1464106	GEO	SRA177782	7	2015	Rutkowski	Ribosome profiling	RP 8 h p.i. - Rep 2	RFP	2		chx	2	8h	skin	NONE			TRUE		HÃ…KON	RFP_2_2_8h_skin_NONE_NA_NA_NA_chx	FALSE	0.262446	0.0285884
PRJNA256320	SRR2064566					SRX663259		OTHER	other		SINGLE			ILLUMINA		SRP044933	PRJNA256320	26878238	256320	SRS668132	SAMN02943088			Homo sapiens	GSM1446838	GEO	SRA176904	2	2016	Loayza-Puch	MCF10A torin RP	MCF10A torin RP	RFP	1	torin	chx			breast	MCF10A			TRUE		HÃ…KON	RFP_NA_1_NA_breast_MCF10A_torin_NA_NA_chx	FALSE	0.262446	0.121343
PRJNA256316	SRR2064432					SRX1059900		OTHER	other		SINGLE			ILLUMINA		SRP044937	PRJNA256316	26878238	256316	SRS962178	SAMN03776749			Homo sapiens	GSM1712833	GEO	SRA176910	2	2016	Loayza-Puch	Kidney tissue	Kidney tumor tissue 1 tumor 2 RP	RFP	1	tumor_tumor	chx	2		kidney	NONE			TRUE		HÃ…KON	RFP_2_1_NA_kidney_NONE_tumor_tumor_NA_NA_chx	FALSE	0.262446	0.00794575
PRJNA275305	SRR1802129					SRX876046		OTHER	other		SINGLE			ILLUMINA		SRP054971	PRJNA275305	26900662	275305	SRS844825	SAMN03342113			Homo sapiens	GSM1608268	GEO	SRA240809	11	2015	Ji	Breast epithelial cell	ERSrcTAM00hr_chx_rep1	RFP	1	WT	chx		0hr	breast	NONE		ER_SrcTAM	TRUE		KORNEL	RFP_NA_1_0hr_breast_NONE_WT_NA_ER_SrcTAM_chx	FALSE	0.262446	0.00711482
PRJNA381596	SRR5413155					SRX2705106		RNA-Seq	cDNA		SINGLE			ILLUMINA		SRP103009	PRJNA381596	28494858	381596	SRS2098810	SAMN06681236			Homo sapiens	GSM2563629	GEO	SRA551465	4	2017	Park	HEK293T cells	RPF, 293T control-treated Rep1	RFP	1	WT	chx			kidney	HEK293		dmso	TRUE		KORNEL	RFP_NA_1_NA_kidney_HEK293_WT_NA_dmso_chx	FALSE	0.262446	0.0296094
PRJNA285961	SRR2052945					SRX1050362		OTHER	other		SINGLE			ILLUMINA		SRP059187	PRJNA285961	29321322	285961	SRS954614	SAMN03763374			Homo sapiens	GSM1704537	GEO	SRA271639	9	2016	Reid	Huh7 cells	Uninfected cytosol ribosome profiling (Rep 3)	RFP	3	WT	chx			liver	Huh7		cyto	TRUE		KORNEL	RFP_NA_3_NA_liver_Huh7_WT_NA_cyto_chx	FALSE	0.262446	0.0208016
PRJNA256316	SRR1528686					SRX663295		OTHER	other		SINGLE			ILLUMINA		SRP044937	PRJNA256316	26878238	256316	SRS668168	SAMN02943066			Homo sapiens	GSM1446874	GEO	SRA176910	2	2016	Loayza-Puch	Kidney normal tissue 1 RP	Kidney normal tissue 1 RP	RFP	1	WT	chx	1		kidney	NONE			TRUE		HÃ…KON	RFP_1_1_NA_kidney_NONE_WT_NA_NA_chx	FALSE	0.262446	0.0222203
PRJNA256316	SRR1528688					SRX663296		OTHER	other		SINGLE			ILLUMINA		SRP044937	PRJNA256316	26878238	256316	SRS668169	SAMN02943068			Homo sapiens	GSM1446875	GEO	SRA176910	2	2016	Loayza-Puch	Kidney normal tissue 2 RP	Kidney normal tissue 2 RP	RFP	1	WT	chx	2		kidney	NONE			TRUE		HÃ…KON	RFP_2_1_NA_kidney_NONE_WT_NA_NA_chx	FALSE	0.262446	0.0538179
PRJNA272597	SRR1758406					SRX842656		RNA-Seq	cDNA		SINGLE			ILLUMINA		SRP052229	PRJNA272597	26729373	272597	SRS818830	SAMN03284284			Homo sapiens	GSM1585238	GEO	SRA231648	1	2016	Xu	Human fibroblast	5_corr d-leucine rep3 RPF	RFP	3	CORR	chx	1	5h	fibroblast	NONE		dLeucine	TRUE		KORNEL	RFP_1_3_5h_fibroblast_NONE_CORR_NA_dLeucine_chx	FALSE	0.261801	0.582791
PRJNA625261	SRR11542141					SRX8112239		OTHER	other		SINGLE			ILLUMINA		SRP256332	PRJNA625261	33296667	625261	SRS6477326	SAMN14596023			Homo sapiens	GSM4475936	GEO	SRA1065150	12	2020	Chen	Adenocarcinoma	1650_DMSO1	RFP	1		chx			lung	NCIH1650		dmso	TRUE		PREETI	RFP_NA_1_NA_lung_NCIH1650_NA_NA_dmso_chx	FALSE	0.26133	0.155133
PRJNA472636	SRR7207263					SRX4116248		OTHER	other		SINGLE			ILLUMINA		SRP148767	PRJNA472636	30089253	472636	SRS3331536	SAMN09238879			Homo sapiens	GSM3150276	GEO	SRA709715	7	2018	Gameiro	Breast epithelial cell	TAM_Ctrl_04hr.1	RFP	1	WT	chx		4h	breast	MCF10A		TAM	TRUE		TESHOME	RFP_NA_1_4h_breast_MCF10A_WT_NA_TAM_chx	FALSE	0.261211	0.172376
PRJNA515289	SRR8445003					SRX5252136		OTHER	other		SINGLE			ILLUMINA		SRP179636	PRJNA515289	33905506	515289	SRS4253843	SAMN10752244			Homo sapiens	GSM3563714	GEO	SRA835182	3	2019	Calviello	HEK 293 FlpIn Trex	HEK 293 cells, ribosome profiling, siDDX3, Replicate 2	RFP	2	KD	chx			kidney	HEK293			TRUE		TESHOME	RFP_NA_2_NA_kidney_HEK293_KD_NA_NA_chx	FALSE	0.260781	0.1494
PRJNA655835	SRR12407384	30280470	1095099474	36	770	SRX8905248		OTHER	other	TRANSCRIPTOMIC	SINGLE	0	0	ILLUMINA	Illumina HiSeq 3000	SRP276619	PRJNA655835	36473845		SRS7163072	SAMN15756318	simple	9606	Homo sapiens	GSM4713005	GEO	SRA1109746	11	2022	Weber	HEK293T	DAP5-1_Ribo: DAP5-null replicate 1 for Ribo-seq	RFP	1	KO				kidney	HEK293	DAP5		TRUE		Hakon	RFP_NA_1_NA_kidney_HEK293_KO_DAP5_NA_NA	FALSE	0.260755	0.251748
PRJNA707431	SRR13884543	63567021	1909446544	30	609	SRX10264812		OTHER	other	TRANSCRIPTOMIC	SINGLE	0	0	ILLUMINA	Illumina NovaSeq 6000	SRP309704	PRJNA707431	35137207		SRS8398441	SAMN18205160	simple	9606	Homo sapiens	GSM5140266	GEO	SRA1203922	7	2021	Luan	Cell line:A549	siL29_10_2.Riboseq	RFP	1					lung	A549		auto_2613	TRUE		auto	RFP_NA_1_NA_lung_A549_NA_NA_auto_2613_NA	FALSE	0.260659	0.441077
PRJNA310107	SRR3131003					SRX1550664		RNA-Seq	cDNA		SINGLE			ILLUMINA		SRP069011	PRJNA310107	27259150	310107	SRS1267381	SAMN04446347			Homo sapiens	GSM2049892	GEO	SRA342556	6	2016	Goodarzi	MDA-parental	MDA-ctrl-RPF-rep1-readlane1	RFP	1	WT	chx			breast	MDA		lane1	TRUE		HÃ…KON	RFP_NA_1_NA_breast_MDA_WT_NA_lane1_chx	FALSE	0.260512	0.110072
PRJNA707431	SRR13884592	68974934	2194090574	31	957	SRX10264921		OTHER	other	TRANSCRIPTOMIC	SINGLE	0	0	ILLUMINA	Illumina NovaSeq 6000	SRP309704	PRJNA707431	35137207		SRS8398552	SAMN18205147	simple	9606	Homo sapiens	GSM5140315	GEO	SRA1203922	7	2021	Luan	Cell line:A549	siS14.Riboseq	RFP	1					lung	A549		auto_2662	TRUE		auto	RFP_NA_1_NA_lung_A549_NA_NA_auto_2662_NA	FALSE	0.260378	0.770824
PRJEB28810	ERR2812360					ERX2819191	human_testis_ribo_3_s	RNA-Seq	other		SINGLE			ILLUMINA		ERP111066	PRJEB28810		575406	ERS2758382	SAMEA4939599			Homo sapiens	SAMEA4939599	Lausanne Genomic Technologies Facility, Lausanne, Switzerland	ERA1612101	10	2019	Wang		E-MTAB-7247:human_testis_ribo_3	RFP	3		chx			testis	NONE			TRUE		PREETI	RFP_NA_3_NA_testis_NONE_NA_NA_NA_chx	FALSE	0.260313	0.301726
PRJNA244941	SRR1257225					SRX522457		OTHER	other		SINGLE			ILLUMINA		SRP041298	PRJNA244941	26338483	244941	SRS594812	SAMN02730056			Homo sapiens	GSM1371443	GEO	SRA158793	8	2015	Jang	U2-OS Cells	WT_ribo_profile_CT00_rep1	RFP	1	WT	chx			bone	U2OS		CT00	TRUE		HÃ…KON	RFP_NA_1_NA_bone_U2OS_WT_NA_CT00_chx	FALSE	0.260256	0.217583
PRJNA940173	SRR23678230	135527534	4698107009	34	1674	SRX19541065	GSM7074856	OTHER	other	TRANSCRIPTOMIC	SINGLE	0	0	ILLUMINA	Illumina NovaSeq 6000	SRP425191	PRJNA940173	1		SRS16926836	SAMN33556613	simple	9606	Homo sapiens	GSM7074856	Molecular and Cell Biology, University of California, Berkeley	SRA1597937	3	2023	Makar	K562	K562 CEBPA reporter cell line, nontargeting sgRNA ribo PI, biol rep 2	RFP	2					bone	K562		PI	TRUE		Michal	RFP_NA_2_NA_bone_K562_NA_NA_PI_NA	FALSE	0.259948	0.061353
PRJNA591625	SRR10530120					SRX7214133		OTHER	other		SINGLE			ILLUMINA		SRP233222	PRJNA591625	33330931	591625	SRS5716936	SAMN13385781			Homo sapiens	GSM4192108	GEO	SRA1002630	11	2020	Selmi	human embryonic stem cells	H9.KO2.2.1_Ribo-seq	RFP	1	KO	chx	2		embryonic	H9		1	TRUE		PREETI	RFP_2_1_NA_embryonic_H9_KO_NA_1_chx	FALSE	0.259902	0.0476566
PRJNA453686	SRR7067558					SRX3998359		RNA-Seq	cDNA		SINGLE			ILLUMINA		SRP142722	PRJNA453686	30305285	453686	SRS3222379	SAMN08985504			Homo sapiens	GSM3112197	GEO	SRA695700	1	2019	Krishnamoorthy	C643	C643-spl-rev_RP_2	RFP	2		chx			thyroid	C643		spl_rev	TRUE		TESHOME	RFP_NA_2_NA_thyroid_C643_NA_NA_spl_rev_chx	FALSE	0.259654	0.073687
PRJNA244941	SRR1257231					SRX522463		OTHER	other		SINGLE			ILLUMINA		SRP041298	PRJNA244941	26338483	244941	SRS594818	SAMN02730058			Homo sapiens	GSM1371449	GEO	SRA158793	8	2015	Jang	U2-OS Cells	WT_ribo_profile_CT12_rep1	RFP	1	WT	chx			bone	U2OS		CT12	TRUE		HÃ…KON	RFP_NA_1_NA_bone_U2OS_WT_NA_CT12_chx	FALSE	0.259608	0.307758
PRJNA414611	SRR6181557					SRX3292094		OTHER	other		SINGLE			ILLUMINA		SRP120157	PRJNA414611	30591072	414611	SRS2601273	SAMN07795665			Homo sapiens	GSM2817685	GEO	SRA620345	4	2018	Murat	ATCC Cell Lines	RPF_DHX36_2	RFP	2		chx	2		ovary	HeLa		DHX36	TRUE		TESHOME	RFP_2_2_NA_ovary_HeLa_NA_NA_DHX36_chx	FALSE	0.259591	0.230126
PRJNA350543	SRR4450328					SRX2268405		OTHER	other		SINGLE			ILLUMINA		SRP092068	PRJNA350543	29551269	350543	SRS1759611	SAMN05941858			Homo sapiens	GSM2360176	GEO	SRA486943	2	2018	Khajuria	CD34+ hematopoietic cells	CD34_shRPL5_RPF_2	RFP	2	KD	frozen			blood	CD34	RPL5		TRUE		KORNEL	RFP_NA_2_NA_blood_CD34_KD_RPL5_NA_frozen	FALSE	0.259567	0.0725192
PRJNA556267	SRR9737073	46666037	2379967887	51	732	SRX6494019		OTHER	other	TRANSCRIPTOMIC	SINGLE	0	0	ILLUMINA	Illumina HiSeq 4000	SRP216083	PRJNA556267	32348767		SRS5142588	SAMN12346083	simple	9606	Homo sapiens	GSM3966952	GEO	SRA925389	1	2020	Groenke	Transfected HEK 293T cells	Ribosome profiling from 72Hmax/46med Replicate 2	RFP	2					kidney	HEK293			TRUE		auto	RFP_NA_2_NA_kidney_HEK293_NA_NA_NA_NA	FALSE	0.258904	0.0759378
PRJNA591625	SRR10530126					SRX7214136		OTHER	other		SINGLE			ILLUMINA		SRP233222	PRJNA591625	33330931	591625	SRS5716939	SAMN13385785			Homo sapiens	GSM4192111	GEO	SRA1002630	11	2020	Selmi	human embryonic stem cells	H9.KO2.2.4_Ribo-seq	RFP	4	KO	chx	2		embryonic	H9		1	TRUE		PREETI	RFP_2_4_NA_embryonic_H9_KO_NA_1_chx	FALSE	0.258732	0.0619989
PRJNA528026	SRR8752384					SRX5543310		RNA-Seq	cDNA		SINGLE			ILLUMINA		SRP188848	PRJNA528026	32040547	528026	SRS4508980	SAMN11166406			Homo sapiens	GSM3679623	GEO	SRA862154	2	2020	Haneke	RPEI cells	FP_DMSO_1	RFP	1		chx			eye	RPEI		dmso	TRUE		TESHOME	RFP_NA_1_NA_eye_RPEI_NA_NA_dmso_chx	FALSE	0.258678	0.0888215
PRJNA636959	SRR11915240					SRX8461797		OTHER	other		SINGLE			ILLUMINA		SRP265763	PRJNA636959	32766783	636959	SRS6763040	SAMN15091033			Homo sapiens	GSM4588295	GEO	SRA1082706	8	2020	Steinberger	HAP1 cells	Hipp_Ribo-Seq_Rep2	RFP	2	Haploid	chx			blood	HAP1		hipp	TRUE		PREETI	RFP_NA_2_NA_blood_HAP1_Haploid_NA_hipp_chx	FALSE	0.258532	0.110496
PRJNA439265	SRR6869756					SRX3824011		RNA-Seq	cDNA		SINGLE			ILLUMINA		SRP136094	PRJNA439265	31174582	439265	SRS3073339	SAMN08743008			Homo sapiens	GSM3057213	GEO	SRA668547	5	2019	BornelÃ¶v	H9 cells	Riboseq differentiating rep2	RFP	2		chx			blood	H9		diff	TRUE		TESHOME	RFP_NA_2_NA_blood_H9_NA_NA_diff_chx	FALSE	0.25853	0.140344
PRJNA707431	SRR13884554	86987199	2742674664	31	1631	SRX10264891		OTHER	other	TRANSCRIPTOMIC	SINGLE	0	0	ILLUMINA	Illumina NovaSeq 6000	SRP309704	PRJNA707431	35137207		SRS8398520	SAMN18205149	simple	9606	Homo sapiens	GSM5140277	GEO	SRA1203922	7	2021	Luan	Cell line:A549	siL38.Riboseq	RFP	1					lung	A549		auto_2648	TRUE		auto	RFP_NA_1_NA_lung_A549_NA_NA_auto_2648_NA	FALSE	0.258452	0.205396
PRJNA822939	SRR18592273	23060798	1960167830	85	663	SRX14720934	GSM6008623	OTHER	other	TRANSCRIPTOMIC	SINGLE	0	0	ILLUMINA	NextSeq 500	SRP367409	PRJNA822939	35858571		SRS12483094	SAMN27283810	simple	9606	Homo sapiens	GSM6008623	Department of Genetics and Genome Sciences, Case Western Reserve University	SRA1400321	4	2022	Krokowski	Corneal epithelial cells	1h 500 mOsm rep4 Ribosome profiling	RFP	4									TRUE		auto	RFP_NA_4_NA_NA_NA_NA_NA_NA_NA	FALSE	0.258404	0.0516107
PRJNA262009	SRR1585500					SRX709843		RNA-Seq	cDNA		SINGLE			ILLUMINA		SRP047476	PRJNA262009	25657249	262009	SRS708860	SAMN03079262			Homo sapiens	GSM1513201	GEO	SRA185822	12	2014	Battle	lymphoblastoid cell lines derived fromHapMap Yoruba individual	GM18520	RFP	15		frozen			bone	LCL		cyto	TRUE		HÃ…KON	RFP_NA_15_NA_bone_LCL_NA_NA_cyto_frozen	FALSE	0.258246	0.0801825
PRJNA681523	SRR13165892					SRX9604753		OTHER	other		SINGLE			ILLUMINA		SRP295094	PRJNA681523		681523	SRS7808354	SAMN16955150			Homo sapiens	GSM4949731	GEO	SRA1165019	4	2021	Waldron	Calu 3 cells, ATCC HTB-50	Calu3_fp_uninf_2	RFP	2	WT	chx			lung	Calu3			TRUE		PREETI	RFP_NA_2_NA_lung_Calu3_WT_NA_NA_chx	FALSE	0.258058	0.149413
PRJNA314507	SRR3208882					SRX1617565		RNA-Seq	cDNA		SINGLE			ILLUMINA		SRP071235	PRJNA314507	27655340	314507	SRS1326995	SAMN04536285			Homo sapiens	GSM2082534	GEO	SRA379362	7	2016	Grabole	TSC2+/+ cells (number 15) treated with AZD-8055, RPF	Ribosome protected fragments (RPF) of TSC2+/+ cells (number 15) treated with AZD-8055, Biological Replicate 2	RFP	2	p_p	chx	15		skin	TSC2		AZD	TRUE		KORNEL	RFP_15_2_NA_skin_TSC2_p_p_NA_AZD_chx	FALSE	0.257917	0.844052
PRJNA729461	SRR14510033	59673248	1600976723	26	683	SRX10855846		OTHER	other	TRANSCRIPTOMIC	SINGLE	0	0	ILLUMINA	Illumina NovaSeq 6000	SRP319472	PRJNA729461	34226921		SRS8951477	SAMN19116472	simple	9606	Homo sapiens	GSM5291877	GEO	SRA1231346	7	2021	Ichihara	HEK293T cells	eIF2A KO HEK293T #1 Ribo-seq replicate 2	RFP	2	KO				kidney	HEK293	eIF2A		TRUE		auto	RFP_NA_2_NA_kidney_HEK293_KO_eIF2A_NA_NA	FALSE	0.257898	0.324608
PRJNA707431	SRR13884565	69831874	2220581437	31	1378	SRX10264958		OTHER	other	TRANSCRIPTOMIC	SINGLE	0	0	ILLUMINA	Illumina NovaSeq 6000	SRP309704	PRJNA707431	35137207		SRS8398589	SAMN18205165	simple	9606	Homo sapiens	GSM5140288	GEO	SRA1203922	7	2021	Luan	Cell line:A549	siNC5.Riboseq	RFP	1					lung	A549		auto_2697	TRUE		auto	RFP_NA_1_NA_lung_A549_NA_NA_auto_2697_NA	FALSE	0.257809	0.28075
PRJNA244941	SRR1257235					SRX522467		OTHER	other		SINGLE			ILLUMINA		SRP041298	PRJNA244941	26338483	244941	SRS594822	SAMN02730008			Homo sapiens	GSM1371453	GEO	SRA158793	8	2015	Jang	U2-OS Cells	WT_ribo_profile_CT20_rep1	RFP	1	WT	chx			bone	U2OS		CT20	TRUE		HÃ…KON	RFP_NA_1_NA_bone_U2OS_WT_NA_CT20_chx	FALSE	0.257594	0.292837
PRJNA806946	SRR18017741	29999790	1121359606	37	445	SRX14171974	GSM5899116	RNA-Seq	cDNA	TRANSCRIPTOMIC	SINGLE	0	0	ILLUMINA	NextSeq 2000	SRP359785	PRJNA806946	36433934		SRS11995937	SAMN25941486	simple	9606	Homo sapiens	GSM5899116	van Heesch, Princess Maxima Center	SRA1372962	12	2022	Palomar-Siles	epithelial	Ribo-Seq H1299-R213XG418-3	RFP	1								auto_3317	TRUE		auto	RFP_NA_1_NA_NA_NA_NA_NA_auto_3317_NA	FALSE	0.257338	0.0485972
PRJNA401882	SRR5990835					SRX3146522		OTHER	cDNA		SINGLE			ILLUMINA		SRP131318	PRJNA401882	29696588	401882	SRS2478480	SAMN07573555			Homo sapiens	GSM2760255	GEO	SRA604097	5	2018	Lin	muscle	Mock,6.25 h, RPF, rep1	RFP	1	mock	chx	6	6h	muscle	NONE			TRUE		TESHOME	RFP_6_1_6h_muscle_NONE_mock_NA_NA_chx	FALSE	0.25718	0.369797
PRJNA401882	SRR5990829					SRX3146520		OTHER	cDNA		SINGLE			ILLUMINA		SRP131318	PRJNA401882	29696588	401882	SRS2478479	SAMN07573557			Homo sapiens	GSM2760253	GEO	SRA604097	5	2018	Lin	muscle and virus	Infect, 3.5 h, RPF, rep1	RFP	1	infected	chx	6	3h	muscle	NONE			TRUE		TESHOME	RFP_6_1_3h_muscle_NONE_infected_NA_NA_chx	FALSE	0.256966	0.30101
PRJNA854905	SRR19918523	19143383	957169150	50	462	SRX15961068	GSM6284789	OTHER	other	TRANSCRIPTOMIC	SINGLE	0	0	ILLUMINA	Illumina HiSeq 2500	SRP384536	PRJNA854905	35891396		SRS13647410	SAMN29472419	simple	9606	Homo sapiens	GSM6284789	Kamini Singh, Molecular Pharmacology, Albert Einstein College of Medicine	SRA1447869	7	2022	Singh	primary hNPC	B3_ribo	RFP	5					throat	NPC		auto_3470	TRUE		auto	RFP_NA_5_NA_throat_NPC_NA_NA_auto_3470_NA	FALSE	0.256761	0.0368521
PRJNA473925	SRR7240724	65450321	3796118618	58	1246	SRX4146505		OTHER	other	TRANSCRIPTOMIC	SINGLE	0	0	ILLUMINA	Illumina HiSeq 2500	SRP149426	PRJNA473925	30297778		SRS3360122	SAMN09288574	simple	9606	Homo sapiens	GSM3168235	GEO	SRA713134	8	2018	Zhang	OE Riboseq	OE Riboseq rep1	RFP	1									TRUE		auto	RFP_NA_1_NA_NA_NA_NA_NA_NA_NA	FALSE	0.256456	0.916399
PRJNA171327	SRR618772					SRX172360	HEK293_LTM_Rep1	RNA-Seq	size fractionation		SINGLE			ILLUMINA		SRP014629	PRJNA171327	23290916	171327	SRS351807	SAMN01093933			Homo sapiens	HEK293_LTM_Rep1	CORNELL	SRA056377	11	2012	Liu		Ribosome profiling of HEK293 cells treated with lactimidomycin, technical replicate #1	RFP	1		ltm			kidney	HEK293			TRUE		HÃ…KON	RFP_NA_1_NA_kidney_HEK293_NA_NA_NA_ltm	FALSE	0.256303	0.0338921
PRJNA660002	SRR12540272					SRX9029931		OTHER	other		SINGLE			ILLUMINA		SRP279211	PRJNA660002	33905506	660002	SRS7281236	SAMN15932201			Homo sapiens	GSM4751860	GEO	SRA1118483	10	2020	Venkataramanan	Colonic carcinoma	HCT-116 cells with DDX3X degron, auxin treated, DDX3X WT transfected, ribosome profiling, replicate 2	RFP	2	OE_DDX3X WT	chx			colon	HCT116		auxin	TRUE		PREETI	RFP_NA_2_NA_colon_HCT116_OE_DDX3X WT_NA_auxin_chx	FALSE	0.25616	0.0330493
PRJNA707431	SRR13884577	87289287	2807269417	32	1239	SRX10264862		OTHER	other	TRANSCRIPTOMIC	SINGLE	0	0	ILLUMINA	Illumina NovaSeq 6000	SRP309704	PRJNA707431	35137207		SRS8398491	SAMN18205131	simple	9606	Homo sapiens	GSM5140300	GEO	SRA1203922	7	2021	Luan	Cell line:A549	siS5.Riboseq	RFP	1					lung	A549		auto_2631	TRUE		auto	RFP_NA_1_NA_lung_A549_NA_NA_auto_2631_NA	FALSE	0.255916	0.447133
PRJNA369756	SRR5227449					SRX2536564		OTHER	other		SINGLE			ILLUMINA		SRP098797	PRJNA369756	29170441	369756	SRS1956504	SAMN06293633			Homo sapiens	GSM2476122	GEO	SRA535328	1	2018	Zhang	Human embryonic kidney cell line	HEK293 RPF Rep2	RFP	2	WT	chx			kidney	HEK293			TRUE		KORNEL	RFP_NA_2_NA_kidney_HEK293_WT_NA_NA_chx	FALSE	0.255531	0.463623
PRJNA257365	SRR1535530					SRX668706		RNA-Seq	cDNA		SINGLE			ILLUMINA		SRP045214	PRJNA257365	25989971	257365	SRS673070	SAMN02950956			Homo sapiens	GSM1464099	GEO	SRA177782	7	2015	Rutkowski	Ribosome profiling	RP 6 h p.i. - Rep 1	RFP	3		chx	1	6h	skin	NONE			TRUE		HÃ…KON	RFP_1_3_6h_skin_NONE_NA_NA_NA_chx	FALSE	0.2548	0.0555777
PRJNA634332	SRR11825723					SRX8376261	4R2	RNA-Seq	PCR		SINGLE			ILLUMINA		SRP262616	PRJNA634332	30920299	634332	SRS6691027	SAMN14988444			Homo sapiens	4R_S8_L002_R1_001	FOOD AND DRUG ADMINISTRATION	SRA1078014	5	2020	Hettiarachchi	primary Hepatocytes	4R2	RFP	2		frozen		240min	liver	hepato			TRUE		PREETI	RFP_NA_2_240min_liver_hepato_NA_NA_NA_frozen	FALSE	0.254777	0.0263922
PRJNA655417	SRR12391515					SRX8889950		OTHER	other		SINGLE			ILLUMINA		SRP276055	PRJNA655417	32992958	655417	SRS7149429	SAMN15734812			Homo sapiens	GSM4711298	GEO	SRA1108561	9	2020	Kiltschewskij	SH-SY5Y cell line	depol 0 hours 1 [k0h1.ribo]	RFP	1	depol	chx		0h	brain	SHSY5Y			TRUE		PREETI	RFP_NA_1_0h_brain_SHSY5Y_depol_NA_NA_chx	FALSE	0.254669	0.313179
PRJNA396698	SRR5886318	78424335	5960249460	76	2119	SRX3052237		OTHER	other	TRANSCRIPTOMIC	SINGLE	0	0	ILLUMINA	NextSeq 500	SRP114504	PRJNA396698	30449621		SRS2398665	SAMN07431144	simple	9606	Homo sapiens	GSM2724037	GEO	SRA595098	11	2018	Arango	HeLa cells, Ribosome Protected RNA	WT_Ribo-seq_BioRep_2 (protected RNA)	RFP	1	WT				ovary	HeLa		auto_960	TRUE		auto	RFP_NA_1_NA_ovary_HeLa_WT_NA_auto_960_NA	FALSE	0.254612	0.209039
PRJNA472636	SRR7207272					SRX4116256		OTHER	other		SINGLE			ILLUMINA		SRP148767	PRJNA472636	30089253	472636	SRS3331544	SAMN09238870			Homo sapiens	GSM3150284	GEO	SRA709715	7	2018	Gameiro	Breast epithelial cell	TAM_Ctrl_04hr.2	RFP	2	WT	chx		4h	breast	MCF10A		TAM	TRUE		TESHOME	RFP_NA_2_4h_breast_MCF10A_WT_NA_TAM_chx	FALSE	0.254217	0.252393
PRJNA379448	SRR5350741					SRX2647163		OTHER	other		SINGLE			ILLUMINA		SRP102020	PRJNA379448	28388414	379448	SRS2052443	SAMN06608455			Homo sapiens	GSM2538886	GEO	SRA546519	6	2017	Slobodin	MCF7	MCF7.Nutlin.ribo	RFP		Nutlin	chx			breast	MCF7			TRUE		HÃ…KON	RFP_NA_NA_NA_breast_MCF7_Nutlin_NA_NA_chx	FALSE	0.253825	0.096415
PRJNA541324	SRR9019683	8343048	425495448	51	289	SRX5797779		RNA-Seq	cDNA	TRANSCRIPTOMIC	SINGLE	0	0	ILLUMINA	Illumina HiSeq 2000	SRP195632	PRJNA541324	31944153		SRS4728923	SAMN11583009	simple	9606	Homo sapiens	GSM3753501	GEO	SRA883373	1	2020	Lyabin	Human embryonic kidney	Ribo-Seq wt (RP_wt), run 1	RFP	1	WT				kidney				TRUE		auto	RFP_NA_1_NA_kidney_NA_WT_NA_NA_NA	FALSE	0.253746	0.0720729
PRJNA299254	SRR2732970					SRX1356474	ribosome profiling custom library	RNA-Seq	other		SINGLE			ILLUMINA		SRP065022	PRJNA299254	24623590	299254	SRS1122385	SAMN04195657			Homo sapiens	Lactimidomycin treated Jurkat cells	VIB	SRA306243	10	2015	Gawron		Lactimidomycin treated Jurkat cells	RFP	1		ltm			blood	Jurkat			TRUE		KORNEL	RFP_NA_1_NA_blood_Jurkat_NA_NA_NA_ltm	FALSE	0.25372	0.518295
PRJNA478455	SRR7451193					SRX4321695	D17-4822	OTHER	RT-PCR		SINGLE			ILLUMINA		SRP151602	PRJNA478455	30466063	478455	SRS3484162	SAMN09516439			Homo sapiens	RE30-1	MASSACHUSETTS INSTITUTE OF TECHNOLOGY	SRA730597	6	2018	Rothenberg		RFP_EGF_30_min_Rep_1	RFP	1		chx		30m	breast	MCF10A		EGF	TRUE		TESHOME	RFP_NA_1_30m_breast_MCF10A_NA_NA_EGF_chx	FALSE	0.253383	0.704844
PRJNA707431	SRR13884578	76313065	2447602303	32	1090	SRX10264863		OTHER	other	TRANSCRIPTOMIC	SINGLE	0	0	ILLUMINA	Illumina NovaSeq 6000	SRP309704	PRJNA707431	35137207		SRS8398490	SAMN18205130	simple	9606	Homo sapiens	GSM5140301	GEO	SRA1203922	7	2021	Luan	Cell line:A549	siS6.Riboseq	RFP	1					lung	A549		auto_2632	TRUE		auto	RFP_NA_1_NA_lung_A549_NA_NA_auto_2632_NA	FALSE	0.253189	0.444621
PRJNA729461	SRR14510028	55523279	1446346407	26	611	SRX10855841		RNA-Seq	cDNA	TRANSCRIPTOMIC	SINGLE	0	0	ILLUMINA	Illumina NovaSeq 6000	SRP319472	PRJNA729461	34226921		SRS8951472	SAMN19116477	simple	9606	Homo sapiens	GSM5291872	GEO	SRA1231346	7	2021	Ichihara	HEK293T cells	WT HEK293T Ribo-seq replicate 1	RFP	1	WT	frozen			kidney	HEK293			TRUE		auto	RFP_NA_1_NA_kidney_HEK293_WT_NA_NA_frozen	FALSE	0.252998	0.279117
PRJNA391171	SRR5720009	35932206	1777360004	49	686	SRX2937089		OTHER	other	TRANSCRIPTOMIC	SINGLE	0	0	ILLUMINA	Illumina HiSeq 2500	SRP109827	PRJNA391171	29129909		SRS2298879	SAMN07258457	simple	9606	Homo sapiens	GSM2676364	GEO	SRA577294	6	2017	Solomon	KD_Riboseq	ADAR_KD_Riboseq_replicate2	RFP	2	KD								TRUE		auto	RFP_NA_2_NA_NA_NA_KD_NA_NA_NA	FALSE	0.2528	0.108023
PRJNA923627	SRR23073612	224347874	11217393700	50	3747	SRX19026763	GSM6932805	OTHER	other	TRANSCRIPTOMIC	SINGLE	0	0	ILLUMINA	Illumina HiSeq 4000	SRP417361	PRJNA923627	1		SRS16445613	SAMN32727555	simple	9606	Homo sapiens	GSM6932805	Arc Institute	SRA1574205	1	2023	Makar	HL-60	HL-60 RPF, pooled	RFP	1									TRUE		auto	RFP_NA_1_NA_NA_NA_NA_NA_NA_NA	FALSE	0.252659	0.0952438
PRJNA591625	SRR10530118					SRX7214131		OTHER	other		SINGLE			ILLUMINA		SRP233222	PRJNA591625	33330931	591625	SRS5716934	SAMN13385783			Homo sapiens	GSM4192106	GEO	SRA1002630	11	2020	Selmi	human embryonic stem cells	H9.KO1.1.3_Ribo-seq	RFP	3	KO	chx	1		embryonic	H9			TRUE		PREETI	RFP_1_3_NA_embryonic_H9_KO_NA_NA_chx	FALSE	0.252458	0.0145488
PRJNA533132	SRR8915510	39415979	2995614404	76	1132	SRX5696964		OTHER	other	TRANSCRIPTOMIC	SINGLE	0	0	ILLUMINA	NextSeq 500	SRP192770	PRJNA533132	1		SRS4636172	SAMN11440440	simple	9606	Homo sapiens	GSM3724997	GEO	SRA875251	8	2022	Makar	ribosome profiling	LogPhase_polysome_rep.2	RFP	2								auto_1344	TRUE		auto	RFP_NA_2_NA_NA_NA_NA_NA_auto_1344_NA	FALSE	0.252433	0.123183
PRJNA453686	SRR7067554					SRX3998355		RNA-Seq	cDNA		SINGLE			ILLUMINA		SRP142722	PRJNA453686	30305285	453686	SRS3222375	SAMN08985508			Homo sapiens	GSM3112193	GEO	SRA695700	1	2019	Krishnamoorthy	C643	C643_RP_1	RFP	1		chx			thyroid	C643			TRUE		TESHOME	RFP_NA_1_NA_thyroid_C643_NA_NA_NA_chx	FALSE	0.252368	0.061315
PRJNA556267	SRR9737075	78930390	4025449890	51	1246	SRX6494021		OTHER	other	TRANSCRIPTOMIC	SINGLE	0	0	ILLUMINA	Illumina HiSeq 4000	SRP216083	PRJNA556267	32348767		SRS5142590	SAMN12346081	simple	9606	Homo sapiens	GSM3966954	GEO	SRA925389	1	2020	Groenke	Transfected HEK 293T cells	Ribosome profiling from 72min Replicate 2	RFP	2					kidney	HEK293		auto_1763	TRUE		auto	RFP_NA_2_NA_kidney_HEK293_NA_NA_auto_1763_NA	FALSE	0.252343	0.142602
PRJNA310015	SRR3129940					SRX1550088		RNA-Seq	cDNA		SINGLE			ILLUMINA		SRP068977	PRJNA310015	27259150	310015	SRS1266867	SAMN04445131			Homo sapiens	GSM2049161	GEO	SRA342122	6	2016	Goodarzi	MDA-LM2	MDA-LM2-RPF-rep1	RFP	1	WT	chx			breast	MDA		LM1a	TRUE		HÃ…KON	RFP_NA_1_NA_breast_MDA_WT_NA_LM1a_chx	FALSE	0.251737	0.0397729
PRJNA275386	SRR1803177					SRX876754		OTHER	other		SINGLE			ILLUMINA		SRP055009	PRJNA275386	26297486	275386	SRS845391	SAMN03344041			Homo sapiens	GSM1609408	GEO	SRA241011	2	2015	Cenik	EBV-transformed lymphoblastoid cells	GM19099_Rep1	RFP	1		chx			bone	LCL		GM19099	TRUE		KORNEL	RFP_NA_1_NA_bone_LCL_NA_NA_GM19099_chx	FALSE	0.251727	0.0195928
PRJNA369756	SRR5227448					SRX2536563		OTHER	other		SINGLE			ILLUMINA		SRP098797	PRJNA369756	29170441	369756	SRS1956503	SAMN06293621			Homo sapiens	GSM2476121	GEO	SRA535328	1	2018	Zhang	Human embryonic kidney cell line	HEK293 RPF Rep1	RFP	1	WT	chx			kidney	HEK293			TRUE		KORNEL	RFP_NA_1_NA_kidney_HEK293_WT_NA_NA_chx	FALSE	0.25165	0.570491
PRJNA244865	SRR1248255					SRX520315		RNA-Seq	cDNA		SINGLE			ILLUMINA		SRP041255	PRJNA244865	25079319	244865	SRS593889	SAMN02729303			Homo sapiens	GSM1370698	GEO	SRA158276	7	2014	Wolfe	KOPT-K1 cell line	Silvestrol (25 nM) treated 2_RF	RFP	2		chx			blood	KOPT		silvestrol	TRUE		HÃ…KON	RFP_NA_2_NA_blood_KOPT_NA_NA_silvestrol_chx	FALSE	0.251345	0.0607092
PRJNA292020	SRR2146889					SRX1134550		OTHER	other		SINGLE			ILLUMINA		SRP062074	PRJNA292020	26595770	292020	SRS1024442	SAMN03959892			Homo sapiens	GSM1844755	GEO	SRA282320	11	2015	Siprashvili	CHL-1 melanoma cells	CHL-1 + CRISPR	RFP		KD	chx			skin	CHL1		CRISPR	TRUE		KORNEL	RFP_NA_NA_NA_skin_CHL1_KD_NA_CRISPR_chx	FALSE	0.251131	0.0737562
PRJNA604580	SRR11005881	40161501	2048236551	51	787	SRX7666675		RNA-Seq	cDNA	TRANSCRIPTOMIC	SINGLE	0	0	ILLUMINA	Illumina HiSeq 4000	SRP246901	PRJNA604580	32744504		SRS6094905	SAMN13975847	simple	9606	Homo sapiens	GSM4293613	GEO	SRA1036472	8	2020	Gaertner	Unmodified hESCs were differentiated to the PP2 stage	Hs_H1_BG97_3D_d11_ctrl_Riboseq_replicate1_2	RFP	1								auto_2115	TRUE		auto	RFP_NA_1_NA_NA_NA_NA_NA_auto_2115_NA	FALSE	0.251079	0.658397
PRJNA625261	SRR11542148					SRX8112246		OTHER	other		SINGLE			ILLUMINA		SRP256332	PRJNA625261	33296667	625261	SRS6477332	SAMN14596016			Homo sapiens	GSM4475943	GEO	SRA1065150	12	2020	Chen	Malignant Melanoma	375_DMSO2	RFP	2		chx			skin	A375		dmso	TRUE		PREETI	RFP_NA_2_NA_skin_A375_NA_NA_dmso_chx	FALSE	0.250913	0.278424
PRJNA556267	SRR9737071	51467562	2624845662	51	795	SRX6494017		OTHER	other	TRANSCRIPTOMIC	SINGLE	0	0	ILLUMINA	Illumina HiSeq 4000	SRP216083	PRJNA556267	32348767		SRS5142586	SAMN12346085	simple	9606	Homo sapiens	GSM3966950	GEO	SRA925389	1	2020	Groenke	Transfected HEK 293T cells	Ribosome profiling from 27wt/72Lmax/27min Replicate 2	RFP	2	WT				kidney	HEK293			TRUE		auto	RFP_NA_2_NA_kidney_HEK293_WT_NA_NA_NA	FALSE	0.25088	0.354519
PRJNA472636	SRR7207260					SRX4116245		OTHER	other		SINGLE			ILLUMINA		SRP148767	PRJNA472636	30089253	472636	SRS3331533	SAMN09238882			Homo sapiens	GSM3150273	GEO	SRA709715	7	2018	Gameiro	Breast epithelial cell	EtOH_Ctrl_04hr.1	RFP	1	WT	chx		4h	breast	MCF10A		EtOH	TRUE		TESHOME	RFP_NA_1_4h_breast_MCF10A_WT_NA_EtOH_chx	FALSE	0.24943	0.105808
PRJNA591625	SRR10530140					SRX7214144		OTHER	other		SINGLE			ILLUMINA		SRP233222	PRJNA591625	33330931	591625	SRS5716947	SAMN13385772			Homo sapiens	GSM4192119	GEO	SRA1002630	11	2020	Selmi	human embryonic stem cells	H9.WT.1.3_Ribo-seq	RFP	3	WT	chx	1		embryonic	H9			TRUE		PREETI	RFP_1_3_NA_embryonic_H9_WT_NA_NA_chx	FALSE	0.248884	0.156935
PRJNA808115	SRR18063241	129227244	4715700602	36	1980	SRX14214943	GSM5906249	OTHER	other	TRANSCRIPTOMIC	SINGLE	0	0	ILLUMINA	NextSeq 500	SRP360420	PRJNA808115	35358571		SRS12036859	SAMN26029174	simple	9606	Homo sapiens	GSM5906249	Cancer Immunology and Virology, DFCI	SRA1376648	8	2022	Farache	SW480 WT	Ribosome profiling, SW480 WT, replicate 2	RFP	2	WT								TRUE		auto	RFP_NA_2_NA_NA_NA_WT_NA_NA_NA	FALSE	0.248589	1.59172
PRJNA707431	SRR13884530	50843857	1598460381	31	815	SRX10264931		OTHER	other	TRANSCRIPTOMIC	SINGLE	0	0	ILLUMINA	Illumina NovaSeq 6000	SRP309704	PRJNA707431	35137207		SRS8398562	SAMN18205328	simple	9606	Homo sapiens	GSM5140253	GEO	SRA1203922	7	2021	Luan	Cell line:A549	siL18.Riboseq	RFP	1					lung	A549		auto_2672	TRUE		auto	RFP_NA_1_NA_lung_A549_NA_NA_auto_2672_NA	FALSE	0.248553	0.128259
PRJNA415033	SRR6191042	30414241	870999789	28	890	SRX3301069		OTHER	other	TRANSCRIPTOMIC	SINGLE	0	0	ILLUMINA	Illumina HiSeq 3000	SRP120504	PRJNA415033	31160600		SRS2612416	SAMN07814391	simple	9606	Homo sapiens	GSM2824219	GEO	SRA621248	7	2019	Sauer	DHX36-KO-HEK293	DHX36-KO Riboseq 3	RFP	3	KO				kidney	HEK293	DHX36-		TRUE		auto	RFP_NA_3_NA_kidney_HEK293_KO_DHX36-_NA_NA	FALSE	0.248477	0.151727
PRJNA448763	SRR6939946					SRX3884298		OTHER	other		SINGLE			ILLUMINA		SRP137150	PRJNA448763	31281537	448763	SRS3123570	SAMN08864568			Homo sapiens	GSM3081758	GEO	SRA681490	6	2019	Zou	tumor_RPF	LC505_tumor_RPF	RFP	6		chx			liver	NONE		tumor	TRUE		TESHOME	RFP_NA_6_NA_liver_NONE_NA_NA_tumor_chx	FALSE	0.248469	0.244696
PRJNA674837	SRR12993029					SRX9444529		OTHER	other		SINGLE			ILLUMINA		SRP291315	PRJNA674837		674837	SRS7658454	SAMN16676459			Homo sapiens	GSM4886543	GEO	SRA1154694	1	2021	Sako	293T	sgDROSHA Ribosome profiling Rep2	RFP	2	KO	chx			kidney	HEK293		DROSHA	TRUE		PREETI	RFP_NA_2_NA_kidney_HEK293_KO_NA_DROSHA_chx	FALSE	0.248248	0.135746
PRJNA591625	SRR10530142					SRX7214146		OTHER	other		SINGLE			ILLUMINA		SRP233222	PRJNA591625	33330931	591625	SRS5716949	SAMN13385770			Homo sapiens	GSM4192121	GEO	SRA1002630	11	2020	Selmi	human embryonic stem cells	H9.WT.2.1_Ribo-seq	RFP	1	WT	chx	2		embryonic	H9		1	TRUE		PREETI	RFP_2_1_NA_embryonic_H9_WT_NA_1_chx	FALSE	0.248062	0.0233323
PRJNA314508	SRR3208869					SRX1617550		RNA-Seq	cDNA		SINGLE			ILLUMINA		SRP071232	PRJNA314508	27655340	314508	SRS1326921	SAMN04536277			Homo sapiens	GSM2082526	GEO	SRA379359	7	2016	Grabole	TSC2-/- cell line generated from hESC cell line 2, RPF	Ribosome protected fragments (RPF) of TSC2-/- cell line generated from hESC cell line 2, Biological Replicate 2	RFP	2	m_m	chx	2		skin	TSC2			TRUE		KORNEL	RFP_2_2_NA_skin_TSC2_m_m_NA_NA_chx	FALSE	0.247845	1.4148
PRJNA262009	SRR1585535					SRX709878		RNA-Seq	cDNA		SINGLE			ILLUMINA		SRP047476	PRJNA262009	25657249	262009	SRS708895	SAMN03079297			Homo sapiens	GSM1513236	GEO	SRA185822	7	2015	Battle	lymphoblastoid cell lines derived fromHapMap Yoruba individual	GM19144	RFP	50		frozen			bone	LCL		cyto	TRUE		HÃ…KON	RFP_NA_50_NA_bone_LCL_NA_NA_cyto_frozen	FALSE	0.247827	0.145064
PRJNA861947	SRR20613396	16409385	488081096	29	263	SRX16637172	GSM6381581	OTHER	other	TRANSCRIPTOMIC	SINGLE	0	0	ILLUMINA	Illumina HiSeq 2500	SRP387901	PRJNA861947	1		SRS14271734	SAMN29933669	simple	9606	Homo sapiens	GSM6381581	Waseda University	SRA1462202	7	2022	Makar	293T	Ribo-seq non-cleaving shNBD1_1	RFP	1					kidney	HEK293		auto_3484	TRUE		auto	RFP_NA_1_NA_kidney_HEK293_NA_NA_auto_3484_NA	FALSE	0.247651	0.123771
PRJNA703954	SRR13762820					SRX10149502		OTHER	other		SINGLE			ILLUMINA		SRP307513	PRJNA703954		703954	SRS8301819	SAMN18025995			Homo sapiens	GSM5099830	GEO	SRA1198815	2	2021	Thomaidou	Human fetal pancreatic bulbs	ENDOC-Î²H1 cells treated with cytokines rep 1 -ribosome profiling [CYT1]	RFP	4	cytokines	chx	1		pancreas	ENDOC			TRUE		PREETI	RFP_1_4_NA_pancreas_ENDOC_cytokines_NA_NA_chx	FALSE	0.247581	0.0121676
PRJNA756018	SRR15513212	72124139	2107713720	29	935	SRX11812006		RNA-Seq	cDNA	TRANSCRIPTOMIC	SINGLE	0	0	ILLUMINA	NextSeq 500	SRP333128	PRJNA756018	35841888		SRS9826523	SAMN20849929	simple	9606	Homo sapiens	GSM5527737	GEO	SRA1280330	7	2022	Chothani	untreated normal human hepatocytes	Hepatocytes_5 (RiboSeq)	RFP	1								auto_3033	TRUE		auto	RFP_NA_1_NA_NA_NA_NA_NA_auto_3033_NA	FALSE	0.247554	0.290982
PRJEB33244	ERR3403485					ERX3427240	M3RPF_s	RNA-Seq	size fractionation		SINGLE			ILLUMINA		ERP116020	PRJEB33244		706227	ERS3547458	SAMEA5744171			Homo sapiens	E-MTAB-8100:M3RPF	Earlham Institute	ERA2022066	3	2021	Lezina	non-small cell lung carcinoma	M3RPF	RFP	3	KO_mutant	chx	1		lung	H1299	p53		TRUE		PREETI	RFP_1_3_NA_lung_H1299_KO_mutant_p53_NA_chx	FALSE	0.247466	0.209484
PRJNA707431	SRR13884521	41158664	1282097305	31	669	SRX10264882		OTHER	other	TRANSCRIPTOMIC	SINGLE	0	0	ILLUMINA	Illumina NovaSeq 6000	SRP309704	PRJNA707431	35137207		SRS8398513	SAMN18205340	simple	9606	Homo sapiens	GSM5140244	GEO	SRA1203922	7	2021	Luan	Cell line:A549	siL10A.Riboseq	RFP	1					lung	A549		auto_2639	TRUE		auto	RFP_NA_1_NA_lung_A549_NA_NA_auto_2639_NA	FALSE	0.247455	0.174467
PRJNA756018	SRR15513161	90457571	3183263050	35	1325	SRX11811955		RNA-Seq	cDNA	TRANSCRIPTOMIC	SINGLE	0	0	ILLUMINA	NextSeq 500	SRP333128	PRJNA756018	35841888		SRS9826473	SAMN20849946	simple	9606	Homo sapiens	GSM5527686	GEO	SRA1280330	7	2022	Chothani	untreated normal human fat tissue	Fat_3 (RiboSeq)	RFP	1								auto_2982	TRUE		auto	RFP_NA_1_NA_NA_NA_NA_NA_auto_2982_NA	FALSE	0.247417	0.0505813
PRJNA523167	SRR8590790					SRX5391053		RNA-Seq	cDNA		SINGLE			ILLUMINA		SRP186252	PRJNA523167	31911279	523167	SRS4378994	SAMN10965462			Homo sapiens	GSM3611940	GEO	SRA850276	12	2019	Vaklavas	Human ER(+) breast cancer	ZR75-1 Full Serum ribosome protected fragments	RFP	1	full	chx			breast	ZR75			TRUE		TESHOME	RFP_NA_1_NA_breast_ZR75_full_NA_NA_chx	FALSE	0.247416	0.0892975
PRJNA548784	SRR9295900					SRX6065280		OTHER	other		SINGLE			ILLUMINA		SRP201361	PRJNA548784	32094190	548784	SRS4966429	SAMN12050138			Homo sapiens	GSM3889088	GEO	SRA898897	2	2020	Philippe	HEK-293T, sgLARP1	93C: larp1sko_torin_RPF_rep2	RFP	2	KO	chx	2		kidney	HEK293		torin	TRUE		TESHOME	RFP_2_2_NA_kidney_HEK293_KO_NA_torin_chx	FALSE	0.24725	0.0991
PRJNA244941	SRR1257248					SRX522480		OTHER	other		SINGLE			ILLUMINA		SRP041298	PRJNA244941	26338483	244941	SRS594835	SAMN02730013			Homo sapiens	GSM1371466	GEO	SRA158793	8	2015	Jang	U2-OS Cells	WT_ribo_profile_CT22_rep2	RFP	2	WT	chx			bone	U2OS		CT22	TRUE		HÃ…KON	RFP_NA_2_NA_bone_U2OS_WT_NA_CT22_chx	FALSE	0.247189	0.0822355
PRJNA542670	SRR9049063					SRX5825535		OTHER	other		SINGLE			ILLUMINA		SRP198270	PRJNA542670	31284728	542670	SRS4753589	SAMN11635166			Homo sapiens	GSM3763607	GEO	SRA885795	10	2019	Chothani	Left ventricle tissue of end-stage DCM patients	Left ventricle tissue of end-stage DCM patients (20JH01781)	RFP	12		chx			heart	NONE			TRUE		TESHOME	RFP_NA_12_NA_heart_NONE_NA_NA_NA_chx	FALSE	0.247118	0.117896
PRJNA707431	SRR13884612	36874833	1188012817	32	545	SRX10264949		OTHER	other	TRANSCRIPTOMIC	SINGLE	0	0	ILLUMINA	Illumina NovaSeq 6000	SRP309704	PRJNA707431	35137207		SRS8398581	SAMN18205179	simple	9606	Homo sapiens	GSM5140335	GEO	SRA1203922	7	2021	Luan	Cell line:A549	siS29.Riboseq	RFP	1					lung	A549		auto_2690	TRUE		auto	RFP_NA_1_NA_lung_A549_NA_NA_auto_2690_NA	FALSE	0.246176	0.306474
PRJNA540298	SRR11626667	61630143	3081507150	50	1144	SRX8190771		OTHER	other	TRANSCRIPTOMIC	SINGLE	0	0	ILLUMINA	Illumina HiSeq 2500	SRP194188	PRJNA540298	34244513		SRS6549561	SAMN14755273	simple	9606	Homo sapiens	GSM4504151	GEO	SRA880706	3	2021	Lim	Prostate cancer tissue	Lucap 145 Tumor sample, Ribosome bound RNA, replicate1	RFP	1					prostate			auto_1359	TRUE		auto	RFP_NA_1_NA_prostate_NA_NA_NA_auto_1359_NA	FALSE	0.245813	0.315047
PRJNA181016	SRR619097					SRX205671		RNA-Seq	size fractionation		SINGLE			ILLUMINA		SRP017263	PRJNA181016	23290916	181016	SRS376445	SAMN01816439			Homo sapiens	FRB-FKBP+Rapalog	CORNELL	SRA061778	7	2015	Liu		FRB-FKBP+Rapalog	RFP		p	chx			kidney	HEK293		Rapalog	TRUE		HÃ…KON	RFP_NA_NA_NA_kidney_HEK293_p_NA_Rapalog_chx	FALSE	0.24577	0.0118554
PRJNA523167	SRR8590769					SRX5391046		RNA-Seq	cDNA		SINGLE			ILLUMINA		SRP186252	PRJNA523167	31911279	523167	SRS4378987	SAMN10965469			Homo sapiens	GSM3611933	GEO	SRA850276	12	2019	Vaklavas	adult human female breast, fibrocystic disease	MCF10A Serum Deprived ribosome protected fragments	RFP	2	deprived	chx			breast	MCF10A			TRUE		TESHOME	RFP_NA_2_NA_breast_MCF10A_deprived_NA_NA_chx	FALSE	0.245765	0.0118511
PRJNA756018	SRR15513223	43881354	1549337969	35	673	SRX11812017		RNA-Seq	cDNA	TRANSCRIPTOMIC	SINGLE	0	0	ILLUMINA	NextSeq 500	SRP333128	PRJNA756018	35841888		SRS9826535	SAMN20849922	simple	9606	Homo sapiens	GSM5527748	GEO	SRA1280330	7	2022	Chothani	untreated normal human vascular smooth muscle cells	VSMC_6 (RiboSeq)	RFP	1					muscle			auto_3043	TRUE		auto	RFP_NA_1_NA_muscle_NA_NA_NA_auto_3043_NA	FALSE	0.245745	0.0822678
PRJNA401882	SRR5990810					SRX3146514		OTHER	cDNA		SINGLE			ILLUMINA		SRP131318	PRJNA401882	29696588	401882	SRS2478473	SAMN07573543			Homo sapiens	GSM2760247	GEO	SRA604097	5	2018	Lin	muscle	Mock,1.75 h, RPF	RFP	5	mock	chx		1h	muscle	NONE			TRUE		TESHOME	RFP_NA_5_1h_muscle_NONE_mock_NA_NA_chx	FALSE	0.245242	0.0979401
PRJNA707431	SRR13884608	70247278	2112466317	30	928	SRX10264945		OTHER	other	TRANSCRIPTOMIC	SINGLE	0	0	ILLUMINA	Illumina NovaSeq 6000	SRP309704	PRJNA707431	35137207		SRS8398577	SAMN18205183	simple	9606	Homo sapiens	GSM5140331	GEO	SRA1203922	7	2021	Luan	Cell line:A549	siS26_5_2.Riboseq	RFP	1					lung	A549		auto_2686	TRUE		auto	RFP_NA_1_NA_lung_A549_NA_NA_auto_2686_NA	FALSE	0.245007	0.691492
PRJNA591625	SRR10530151					SRX7214150		OTHER	other		SINGLE			ILLUMINA		SRP233222	PRJNA591625	33330931	591625	SRS5716953	SAMN13385766			Homo sapiens	GSM4192125	GEO	SRA1002630	11	2020	Selmi	human embryonic stem cells	H9.WTc.3.2_Ribo-seq	RFP	2	WT	chx	3		embryonic	H9		2	TRUE		PREETI	RFP_3_2_NA_embryonic_H9_WT_NA_2_chx	FALSE	0.2448	0.0542453
PRJNA604580	SRR11005883	42527836	2168919636	51	835	SRX7666677		RNA-Seq	cDNA	TRANSCRIPTOMIC	SINGLE	0	0	ILLUMINA	Illumina HiSeq 4000	SRP246901	PRJNA604580	32744504		SRS6094907	SAMN13975845	simple	9606	Homo sapiens	GSM4293615	GEO	SRA1036472	8	2020	Gaertner	Unmodified hESCs were differentiated to the PP2 stage	Hs_H1_BG97_3D_d11_ctrl_Riboseq_replicate1_4	RFP	1								auto_2117	TRUE		auto	RFP_NA_1_NA_NA_NA_NA_NA_auto_2117_NA	FALSE	0.2447	0.486013
PRJNA391171	SRR5720008	29822088	1481280014	49	607	SRX2937088		OTHER	other	TRANSCRIPTOMIC	SINGLE	0	0	ILLUMINA	Illumina HiSeq 2500	SRP109827	PRJNA391171	29129909		SRS2298877	SAMN07258458	simple	9606	Homo sapiens	GSM2676363	GEO	SRA577294	6	2017	Solomon	control_Riboseq	control_Riboseq_replicate2	RFP	2	WT								TRUE		auto	RFP_NA_2_NA_NA_NA_WT_NA_NA_NA	FALSE	0.244698	0.16341
PRJNA599943	SRR10850872					SRX7521415		RNA-Seq	cDNA		SINGLE			ILLUMINA		SRP240357	PRJNA599943	32807779	599943	SRS5961024	SAMN13762540			Homo sapiens	GSM4256666	GEO	SRA1022253	6	2020	Karousis	CTRL KD 02 - riboseq	SK2_M (L7)	RFP	2	WT	frozen			ovary	HeLa		L7	TRUE		PREETI	RFP_NA_2_NA_ovary_HeLa_WT_NA_L7_frozen	FALSE	0.244552	0.37422
PRJNA129385	SRR057526					SRX021972	GSM546926: Footprint_mock_12hr_run1	RNA-Seq	cDNA		SINGLE			ILLUMINA		SRP002605	PRJNA129385	20703300	129385	SRS079391	SAMN00014836			Homo sapiens	GSM546926	GEO	SRA020150	8	2010	Guo	HeLa	Footprint_mock_12hr_run1	RFP	1	WT	chx		12h	ovary	HeLa			TRUE		HÃ…KON	RFP_NA_1_12h_ovary_HeLa_WT_NA_NA_chx	FALSE	0.244257	0.129181
PRJNA268222	SRR1660331					SRX765941		RNA-Seq	cDNA		SINGLE			ILLUMINA		SRP050147	PRJNA268222	25896322	268222	SRS750218	SAMN03216854			Homo sapiens	GSM1552807	GEO	SRA204209	4	2015	Grow	Rec-OE-NCCIT hECC	Rec-OE NCCIT Ribosome profiling (RPF)	RFP	4	OE	chx			mediastinum	NCCIT		Rec	TRUE		KORNEL	RFP_NA_4_NA_mediastinum_NCCIT_OE_NA_Rec_chx	FALSE	0.243741	0.35883
PRJNA591767	SRR10533462	42924997	2189174847	51	756	SRX7217428		OTHER	other	TRANSCRIPTOMIC	SINGLE	0	0	ILLUMINA	Illumina HiSeq 2000	SRP233276	PRJNA591767	32488114		SRS5720076	SAMN13387514	simple	9606	Homo sapiens	GSM4192434	GEO	SRA1003111	11	2019	Choudhary	U343_Riboseq_T1	U343_Riboseq_T1_replicate_1 [U343_L1_5GY_T1_S11_L002]	RFP	1								auto_2047	TRUE		auto	RFP_NA_1_NA_NA_NA_NA_NA_auto_2047_NA	FALSE	0.243637	0.447704
PRJNA756018	SRR15513211	126244399	4438520320	35	1861	SRX11812005		RNA-Seq	cDNA	TRANSCRIPTOMIC	SINGLE	0	0	ILLUMINA	NextSeq 500	SRP333128	PRJNA756018	35841888		SRS9826522	SAMN20849928	simple	9606	Homo sapiens	GSM5527736	GEO	SRA1280330	7	2022	Chothani	untreated normal human hepatocytes	Hepatocytes_4 (RiboSeq)	RFP	1								auto_3032	TRUE		auto	RFP_NA_1_NA_NA_NA_NA_NA_auto_3032_NA	FALSE	0.243257	0.38312
PRJNA257365	SRR1535524					SRX668704		RNA-Seq	cDNA		SINGLE			ILLUMINA		SRP045214	PRJNA257365	25989971	257365	SRS673067	SAMN02950954			Homo sapiens	GSM1464097	GEO	SRA177782	7	2015	Rutkowski	Ribosome profiling	RP 2 h p.i. - Rep 1	RFP	3		chx	1	2h	skin	NONE			TRUE		HÃ…KON	RFP_1_3_2h_skin_NONE_NA_NA_NA_chx	FALSE	0.242873	0.081134
PRJNA779461	SRR16913153	39484812	1974240600	50	603	SRX13105581		OTHER	other	TRANSCRIPTOMIC	SINGLE	0	0	ILLUMINA	Illumina HiSeq 2000	SRP345494	PRJNA779461	35748872		SRS11041827	SAMN23039086	simple	9606	Homo sapiens	GSM5685759	GEO	SRA1327447	6	2022	Su	human colorectal carcinoma cell line	set24.TOP3B-KO2.Ribo-seq.rep2	RFP	2			b2					auto_3249	TRUE		auto	RFP_b2_2_NA_NA_NA_NA_NA_auto_3249_NA	FALSE	0.242841	0.1988
PRJNA533132	SRR8915513	40471795	3075856420	76	1095	SRX5696967		OTHER	other	TRANSCRIPTOMIC	SINGLE	0	0	ILLUMINA	NextSeq 500	SRP192770	PRJNA533132	1		SRS4636175	SAMN11440437	simple	9606	Homo sapiens	GSM3725000	GEO	SRA875251	8	2022	Makar	ribosome profiling	#NAME?	RFP	1								auto_1347	TRUE		auto	RFP_NA_1_NA_NA_NA_NA_NA_auto_1347_NA	FALSE	0.242753	0.238934
PRJNA505780	SRR8197274	23155532	601462990	25	273	SRX5016651		OTHER	other	TRANSCRIPTOMIC	SINGLE	0	0	ILLUMINA	Illumina HiSeq 4000	SRP169066	PRJNA505780	34914197		SRS4049918	SAMN10434877	simple	9606	Homo sapiens	GSM3476301	GEO	SRA810852	11	2021	Riepe	HEK293 cell line	ribo_72_rcas9_e	RFP	1	cas9				kidney	HEK293		auto_1218	TRUE		auto	RFP_NA_1_NA_kidney_HEK293_cas9_NA_auto_1218_NA	FALSE	0.242736	0.0946814
PRJNA523167	SRR8590796					SRX5391058		RNA-Seq	cDNA		SINGLE			ILLUMINA		SRP186252	PRJNA523167	31911279	523167	SRS4378999	SAMN10965457			Homo sapiens	GSM3611945	GEO	SRA850276	12	2019	Vaklavas	Human triple negative breast cancer	SUM159PT Full Serum 5 hours ribosome protected fragments	RFP	1	full	chx		5h	breast	SUM159			TRUE		TESHOME	RFP_NA_1_5h_breast_SUM159_full_NA_NA_chx	FALSE	0.242657	0.0864388
PRJNA707431	SRR13884534	93627439	2848301967	30	922	SRX10264935		OTHER	other	TRANSCRIPTOMIC	SINGLE	0	0	ILLUMINA	Illumina NovaSeq 6000	SRP309704	PRJNA707431	35137207		SRS8398566	SAMN18205361	simple	9606	Homo sapiens	GSM5140257	GEO	SRA1203922	7	2021	Luan	Cell line:A549	siL21_8_2.Riboseq	RFP	1					lung	A549		auto_2676	TRUE		auto	RFP_NA_1_NA_lung_A549_NA_NA_auto_2676_NA	FALSE	0.242443	0.6575
PRJNA515289	SRR8445000					SRX5252133		OTHER	other		SINGLE			ILLUMINA		SRP179636	PRJNA515289	33905506	515289	SRS4253838	SAMN10752247			Homo sapiens	GSM3563711	GEO	SRA835182	3	2019	Calviello	HEK 293 FlpIn Trex	HEK 293 cells, ribosome profiling, ctrl, Replicate 1	RFP	1	WT	chx			kidney	HEK293			TRUE		TESHOME	RFP_NA_1_NA_kidney_HEK293_WT_NA_NA_chx	FALSE	0.242436	0.160078
PRJNA244941	SRR1257232					SRX522464		OTHER	other		SINGLE			ILLUMINA		SRP041298	PRJNA244941	26338483	244941	SRS594819	SAMN02730055			Homo sapiens	GSM1371450	GEO	SRA158793	8	2015	Jang	U2-OS Cells	WT_ribo_profile_CT14_rep1	RFP	1	WT	chx			bone	U2OS		CT14	TRUE		HÃ…KON	RFP_NA_1_NA_bone_U2OS_WT_NA_CT14_chx	FALSE	0.242394	0.293977
PRJNA591767	SRR10533458	45522297	2321637147	51	873	SRX7217424		OTHER	other	TRANSCRIPTOMIC	SINGLE	0	0	ILLUMINA	Illumina HiSeq 2000	SRP233276	PRJNA591767	32488114		SRS5720072	SAMN13387518	simple	9606	Homo sapiens	GSM4192430	GEO	SRA1003111	11	2019	Choudhary	U251_Riboseq_T24	U251_Riboseq_T24_replicate_2 [U251_L2_5GY_T24_S6_L001]	RFP	1								auto_2043	TRUE		auto	RFP_NA_1_NA_NA_NA_NA_NA_auto_2043_NA	FALSE	0.242371	0.710472
PRJNA604580	SRR11005877	33851179	1726410129	51	670	SRX7666671		RNA-Seq	cDNA	TRANSCRIPTOMIC	SINGLE	0	0	ILLUMINA	Illumina HiSeq 4000	SRP246901	PRJNA604580	32744504		SRS6094901	SAMN13975852	simple	9606	Homo sapiens	GSM4293609	GEO	SRA1036472	8	2020	Gaertner	Unmodified hESCs were differentiated to the PP2 stage	Hs_H1_BG96_3D_d11_ctrl_Riboseq_replicate1_3	RFP	1								auto_2111	TRUE		auto	RFP_NA_1_NA_NA_NA_NA_NA_auto_2111_NA	FALSE	0.242235	0.653118
PRJNA263582	SRR2086031					SRX1080130		OTHER	other		SINGLE			ILLUMINA		SRP048825	PRJNA263582	26399832	263582	SRS977990	SAMN03838482			Homo sapiens	GSM1782880	GEO	SRA189363	9	2015	Werner	hES cell, treated with sh targeting TCOF1, ND 3d	ribo_ND3_shTCOF1	RFP		KO	chx	5	3d	embryonic	H1		TCOF1	TRUE		KORNEL	RFP_5_NA_3d_embryonic_H1_KO_NA_TCOF1_chx	FALSE	0.242177	0.176813
PRJNA542670	SRR9049072					SRX5825544		OTHER	other		SINGLE			ILLUMINA		SRP198270	PRJNA542670	31284728	542670	SRS4753598	SAMN11635156			Homo sapiens	GSM3763616	GEO	SRA885795	10	2019	Chothani	Left ventricle tissue of end-stage DCM patients	Left ventricle tissue of end-stage DCM patients (20NB01855)	RFP	21		chx			heart	NONE			TRUE		TESHOME	RFP_NA_21_NA_heart_NONE_NA_NA_NA_chx	FALSE	0.241986	0.0851041
PRJNA541324	SRR9019693	16032682	817666782	51	549	SRX5797789		RNA-Seq	cDNA	TRANSCRIPTOMIC	SINGLE	0	0	ILLUMINA	Illumina HiSeq 2000	SRP195632	PRJNA541324	31944153		SRS4728933	SAMN11582995	simple	9606	Homo sapiens	GSM3753511	GEO	SRA883373	1	2020	Lyabin	Human embryonic kidney	Ribo-Seq wt+HA-YB-1 (RP_wt_YB1), run 2	RFP	2					kidney			auto_1364	TRUE		auto	RFP_NA_2_NA_kidney_NA_NA_NA_auto_1364_NA	FALSE	0.241786	0.0935432
PRJNA806946	SRR18017759	39737979	1410249673	35	553	SRX14171956	GSM5899098	RNA-Seq	cDNA	TRANSCRIPTOMIC	SINGLE	0	0	ILLUMINA	NextSeq 2000	SRP359785	PRJNA806946	36433934		SRS11995919	SAMN25941504	simple	9606	Homo sapiens	GSM5899098	van Heesch, Princess Maxima Center	SRA1372962	12	2022	Palomar-Siles	epithelial	Ribo-Seq H1299-EV-1	RFP	1									TRUE		auto	RFP_NA_1_NA_NA_NA_NA_NA_NA_NA	FALSE	0.241697	0.27931
PRJNA707431	SRR13884563	75725478	2338424494	30	1121	SRX10264956		OTHER	other	TRANSCRIPTOMIC	SINGLE	0	0	ILLUMINA	Illumina NovaSeq 6000	SRP309704	PRJNA707431	35137207		SRS8398586	SAMN18205174	simple	9606	Homo sapiens	GSM5140286	GEO	SRA1203922	7	2021	Luan	Cell line:A549	siNC1.Riboseq	RFP	1					lung	A549		auto_2695	TRUE		auto	RFP_NA_1_NA_lung_A549_NA_NA_auto_2695_NA	FALSE	0.241696	1.05118
[truncated: 1,724 more rows]
[truncated: 3 more columns]

## Sheet: sortZscore
study_accession	Run	spots	bases	avgLength	size_MB	Experiment	LibraryName	LibraryStrategy	LibrarySelection	LibrarySource	LibraryLayout	InsertSize	InsertDev	Platform	Model	SRAStudy	BioProject	Study_Pubmed_id	ProjectID	Sample	BioSample	SampleType	TaxID	ScientificName	SampleName	CenterName	Submission	MONTH	YEAR	AUTHOR	sample_source	sample_title	LIBRARYTYPE	REPLICATE	CONDITION	INHIBITOR	BATCH	TIMEPOINT	TISSUE	CELL_LINE	GENE	FRACTION	KEEP	UNIQUE	CHECKED	name	not_unique	ratio	mean_tpm
[truncated: 2,783 more rows]
[truncated: 3 more columns]

[truncated: 3 more sheets: Sheet2, Sheet3, Sheet4]
