# Supplementary material for: Triple coding in human SRD5A1 mRNA
Source: Research Square preprint supplement (doi:10.21203/rs.3.rs-5390104/v1), 2024-12-19
Supplement: Supplementary file 4 [file 7bf3fb81b0f9bdfc702c9a41.xlsx]

## Sheet: Sheet1
Primers for IVA cloning	n°	T°	Sequence
ATG3 to AAG F	p1461	72,8°C	CCAGCCCTGGCGAAGGCAACGGCGACGGG
ATG3 to AAG R	p1462	56°C	CGCCAGGGCTGGGCAG
ATG2 to AAG F	p1463	72,8°C	GCGGCCTCTGGGGCAAGGAGCACGCTGCC
ATG2 to AAG R	p1464	53°C	TGCCCCAGAGGCCGC
ATG1 to AAG F	p1465	67,5°C	GCCGCCCTATAAGTTGCCCGCCGCG
ATG1 to AAG R	p1525	53°C	T ATA GGG CGG CGG CGC G
ATG1 Perfect F	p1467	78,5°C	GCGCCGCCGCCCAACATGGTGCCCGCCGCGGC
ATG1 Perfect R	p1468	63,9°C	GGGCGGCGGCGCGGGG
primers for pcr from gDNA
SRD5A1_F_60C	p1442		ctggGAGCTCCCTTTCTGCAGAGTCCCGGCAGTG
SRD5A1_R1	p1446		ctggaccggtCAGGCGCTCCTCCGCCAC
SRD5A1_R2	p1447		ctggaccggtgCAGGCGCTCCTCCGCCAC
SRD5A1_R3	p1448		ctggaccggtagCAGGCGCTCCTCCGCCAC

## Sheet: Sheet2
	gBlock SNAP-P2A-Nluc
	aaaatctagaGACAAAGACTGCGAAAAGAAGCGCACCACCCTGGATAGCCCTCTGGGCAAGCTGGAACTGTCTGGGTGCGAACAGGGCCTGCACCGTATCATCTTCCTGGGCAAAGGAACATCTGCCGCCGACGCCGTGGAAGTGCCTGCCCCAGCCGCCGTGCTGGGCGGACCAGAGCCACTGATGCAGGCCACCGCCTGGCTCAACGCCTACTTTCACCAGCCTGAGGCCATCGAGGAGTTCCCTGTGCCAGCCCTGCACCACCCAGTGTTCCAGCAGGAGAGCTTTACCCGCCAGGTGCTGTGGAAACTGCTGAAAGTGGTGAAGTTCGGAGAGGTCATCAGCTACAGCCACCTGGCCGCCCTGGCCGGCAATCCCGCCGCCACCGCCGCCGTGAA…
